# Supplementary material for: Microhydration of small protonated polyaromatic hydrocarbons: a first principles study
Source: Royal Society of Chemistry journal article supplement (doi:10.1039/d3cp06000d), 2024-01-01
Supplement: d3cp06000d1.pdf [file d3cp06000d1.pdf]

## Electronic Supplementary Material

### Microhydration of Small Protonated Polyaromatic Hydrocarbons: A First Principles Study

**Muthuramalingam Prakash,<sup>\*,†</sup> K. Rudharachari Maiyelvaganan,<sup>†,#</sup> N. Giri Lakshman,<sup>†,#</sup>,  
C. Gopalakrishnan,<sup>†,#</sup>, Majdi Hochlaf<sup>\*,‡</sup>**

<sup>†</sup> Computational Chemistry Research Laboratory (CCRL), Department of Chemistry, SRM Institute of Science and Technology, Kattankulathur-603203, Chengalpattu District, Tamil Nadu, India.

<sup>‡</sup> Université Gustave Eiffel, COSYS/IMSE, 5 Bd Descartes, 77454, Champs Sur Marne, France.

<sup>#</sup> *These authors contributed equally to this work.*

---

\* Authors for correspondence

M. P.: Phone: +91 44 2741 6230. Email: M.P.: [prakashspm@gmail.com](mailto:prakashspm@gmail.com) & [prakashm4@srmist.edu.in](mailto:prakashm4@srmist.edu.in);

ORCID: [orcid.org/0000-0002-1886-7708](https://orcid.org/0000-0002-1886-7708);

M. H.: email: [majdi.hochlaf@univ-eiffel.fr](mailto:majdi.hochlaf@univ-eiffel.fr); ORCID: [orcid.org/0000-0002-4714737-7978](https://orcid.org/0000-0002-4714737-7978)

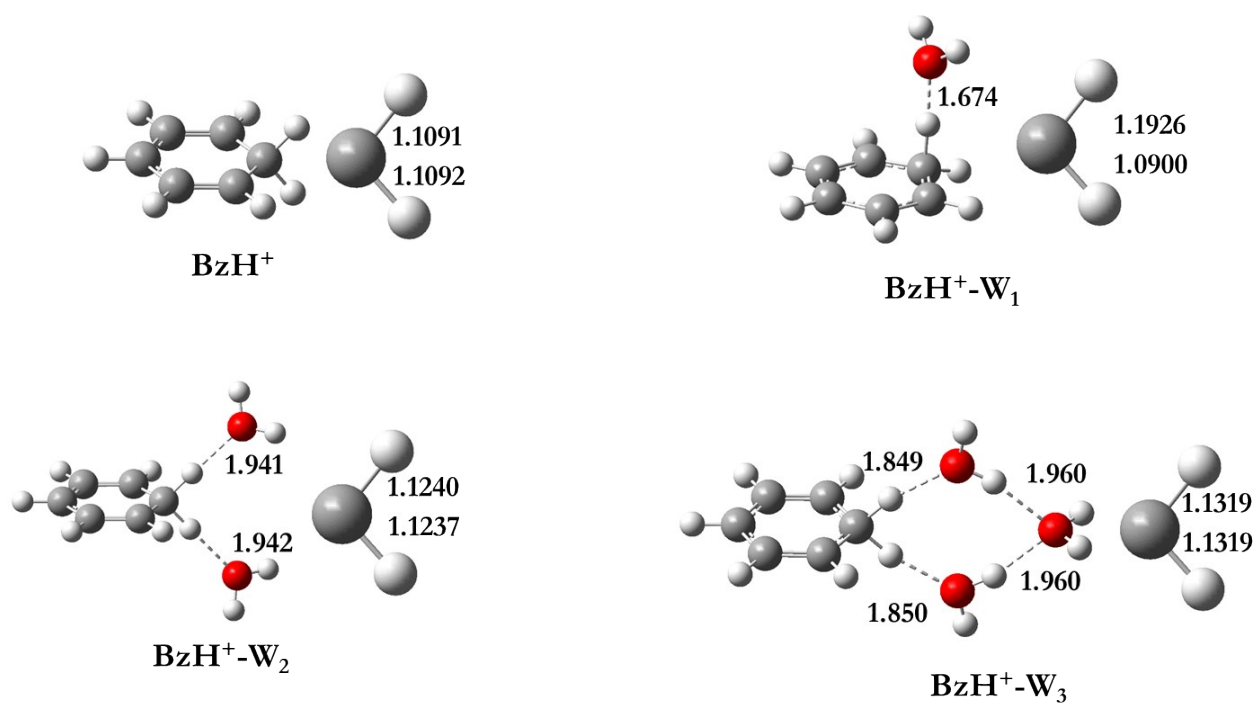

**Figure S1:** Optimized structures of BzH<sup>+</sup>, and BzH<sup>+</sup>-W<sub>*n*</sub>, (*n* = 1 – 3) clusters at MP2/6-311++G<sup>\*\*</sup>. Close view of the sp<sup>3</sup> C-H bond distances (before and after hydration) and the intermonomer distances (in Å) are given.

**Table S1:** Optimized equilibrium structures of protonated  $\text{BzH}^+-\text{W}_n$  ( $n = 1 - 3$ ) clusters and their different isomers at MP2/6-311++G\*\* level. The calculated total energy ( $E_T$ ) and their relative energies ( $E_R$ ) are provided. Most stable isomers are in bold letter. These isoemers are given based on the mode of interaction

| $\text{BzH}^+-\text{W}_n$                                                               | $E_T$ (a.u)       | $E_R$ (a.u) | $E_R$ (kcal/mol) |
|-----------------------------------------------------------------------------------------|-------------------|-------------|------------------|
| $\text{BzH}^+-\text{W}_{1a}$ (C-H $\cdots$ O)                                           | -308.16771        | 0.009847    | 6.17             |
| <b><math>\text{BzH}^+-\text{W}_{1b}</math> (O-H<math>\cdots</math><math>\pi</math>)</b> | <b>-308.17756</b> | <b>0</b>    | <b>0</b>         |
| $\text{BzH}^+-\text{W}_{1c}$ (O-H $\cdots$ $\pi$ )                                      | -308.17599        | 0.00157     | 0.98             |
| $\text{BzH}^+-\text{W}_{2a}$ (C-H $\cdots$ O)                                           | -384.45717        | 0.0389441   | 24.43            |
| <b><math>\text{BzH}^+-\text{W}_{2b}</math> (O-H<math>\cdots</math><math>\pi</math>)</b> | <b>-384.49611</b> | <b>0</b>    | <b>0</b>         |
| $\text{BzH}^+-\text{W}_{3a}$ (C-H $\cdots$ O)                                           | -460.75523        | 0.0506862   | 31.80            |
| <b><math>\text{BzH}^+-\text{W}_{3b}</math> (O-H<math>\cdots</math><math>\pi</math>)</b> | <b>-460.80591</b> | <b>0</b>    | <b>0</b>         |
| $\text{BzH}^+-\text{W}_{3c}$ (O-H $\cdots$ $\pi$ )                                      | -460.79994        | 0.0059776   | 3.75             |

of atoms within  $\text{BzH}^+-\text{W}_n$  ( $n = 1 - 3$ ) clusters

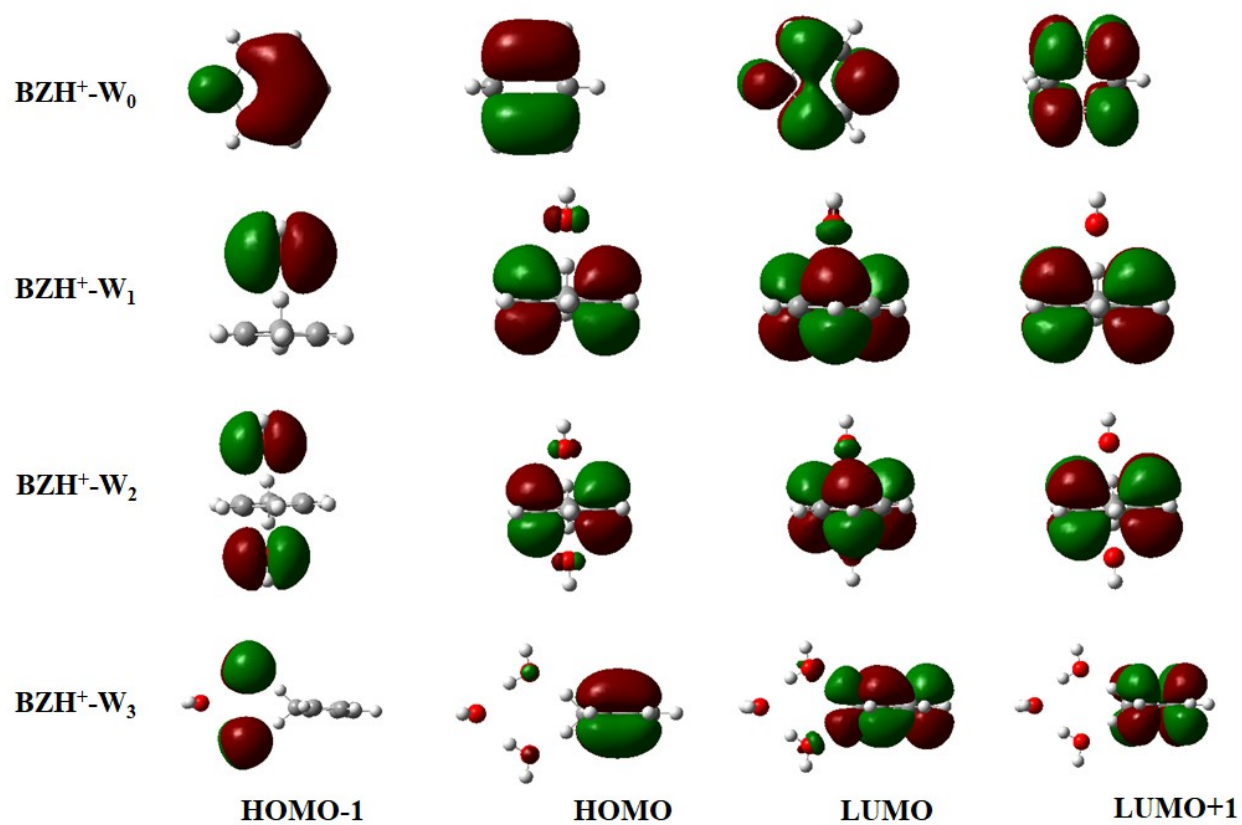

**Figure S2:** Molecular Orbital diagram of BzH<sup>+</sup>-W<sub>n</sub> (n=0-3) clusters.

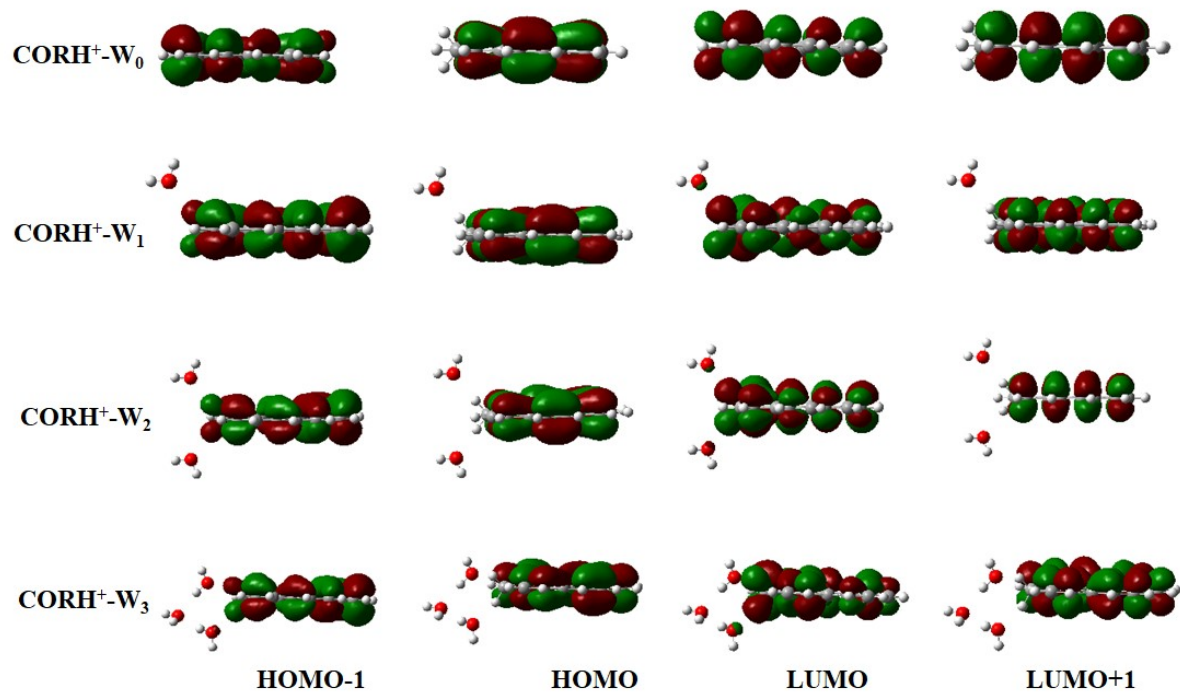

**Figure S3:** Molecular Orbital diagram of  $\text{CorH}^+-\text{W}_n$  ( $n=0-3$ ) clusters.

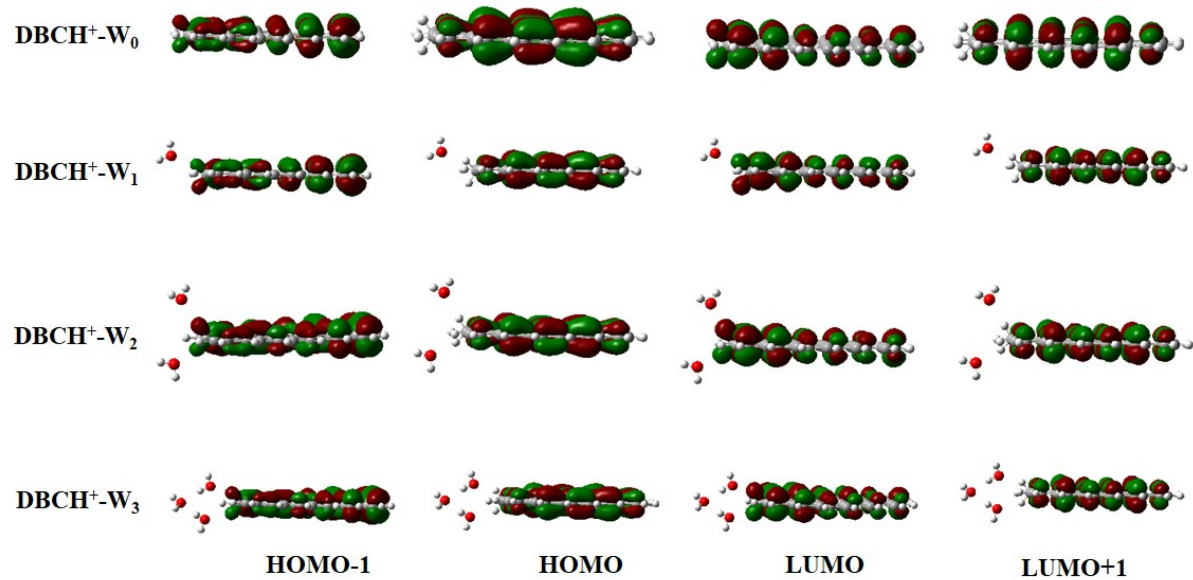

**Figure S4:** Molecular Orbital diagram of DbcH<sup>+</sup>-W<sub>n</sub> (n=0-3) clusters.

**Table S2:** Optimized equilibrium structures of  $\text{BzH}^+-\text{W}_n$ ,  $\text{CorH}^+-\text{W}_n$  and  $\text{DbcH}^+-\text{W}_n$  ( $n = 1, 2, 3$ ) clusters regenerated from PBE0/6-311++G\*\* optimized geometries using CREST approach. C1, C2 and C3 represents the different minimum energy confirmations. These conformers are generated from CREST algorithm using tight-binding semi-empirical method. The total conformational relative energies are provided in kcal/mol.

|                                                                                                                                                                                   |                                                                                                                                                                                                                                                                                                                                                                                                                                                                                                                                                                                                                                                                                                                                                                                                                                                                                                                                                                                                                                                                                                                                                                                                                                                                                                                                                                                                      |              |              |              |             |   |             |              |             |   |              |             |             |   |             |              |             |   |              |             |             |   |             |              |              |   |             |             |              |   |              |              |              |   |              |             |              |   |             |              |              |   |              |              |              |   |              |              |             |   |             |             |             |   |              |              |              |   |              |              |              |   |              |              |              |
|-----------------------------------------------------------------------------------------------------------------------------------------------------------------------------------|------------------------------------------------------------------------------------------------------------------------------------------------------------------------------------------------------------------------------------------------------------------------------------------------------------------------------------------------------------------------------------------------------------------------------------------------------------------------------------------------------------------------------------------------------------------------------------------------------------------------------------------------------------------------------------------------------------------------------------------------------------------------------------------------------------------------------------------------------------------------------------------------------------------------------------------------------------------------------------------------------------------------------------------------------------------------------------------------------------------------------------------------------------------------------------------------------------------------------------------------------------------------------------------------------------------------------------------------------------------------------------------------------|--------------|--------------|--------------|-------------|---|-------------|--------------|-------------|---|--------------|-------------|-------------|---|-------------|--------------|-------------|---|--------------|-------------|-------------|---|-------------|--------------|--------------|---|-------------|-------------|--------------|---|--------------|--------------|--------------|---|--------------|-------------|--------------|---|-------------|--------------|--------------|---|--------------|--------------|--------------|---|--------------|--------------|-------------|---|-------------|-------------|-------------|---|--------------|--------------|--------------|---|--------------|--------------|--------------|---|--------------|--------------|--------------|
| 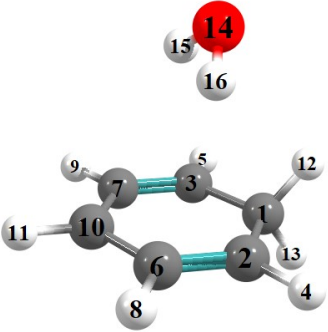 <p style="text-align: center;"><b>C1-BzH<sup>+</sup>-W<sub>1</sub></b><br/>[-21.40866996]</p>   | <table border="1"> <tbody> <tr><td>C</td><td>0.226212830</td><td>0.215386678</td><td>1.491105670</td></tr> <tr><td>C</td><td>0.409117635</td><td>-1.130449820</td><td>0.877787890</td></tr> <tr><td>C</td><td>0.427836551</td><td>1.329616984</td><td>0.522271877</td></tr> <tr><td>H</td><td>0.285969244</td><td>-1.983554975</td><td>1.528242177</td></tr> <tr><td>H</td><td>0.318849174</td><td>2.333699523</td><td>0.904372418</td></tr> <tr><td>C</td><td>0.717623548</td><td>-1.292593486</td><td>-0.433601781</td></tr> <tr><td>C</td><td>0.735851420</td><td>1.109318185</td><td>-0.780652297</td></tr> <tr><td>H</td><td>0.841637462</td><td>-2.288430397</td><td>-0.836487155</td></tr> <tr><td>H</td><td>0.873862786</td><td>1.948414963</td><td>-1.448684330</td></tr> <tr><td>C</td><td>0.885409373</td><td>-0.191468773</td><td>-1.289746133</td></tr> <tr><td>H</td><td>1.134271572</td><td>-0.343262960</td><td>-2.327061526</td></tr> <tr><td>H</td><td>-0.780072317</td><td>0.287382577</td><td>1.936328307</td></tr> <tr><td>H</td><td>0.913831844</td><td>0.333448457</td><td>2.344231227</td></tr> <tr><td>O</td><td>-2.531814986</td><td>-0.041294105</td><td>-0.361281169</td></tr> <tr><td>H</td><td>-1.980525704</td><td>0.705934835</td><td>-0.605978334</td></tr> <tr><td>H</td><td>-1.959563479</td><td>-0.812536895</td><td>-0.373779728</td></tr> </tbody> </table>    | C            | 0.226212830  | 0.215386678  | 1.491105670 | C | 0.409117635 | -1.130449820 | 0.877787890 | C | 0.427836551  | 1.329616984 | 0.522271877 | H | 0.285969244 | -1.983554975 | 1.528242177 | H | 0.318849174  | 2.333699523 | 0.904372418 | C | 0.717623548 | -1.292593486 | -0.433601781 | C | 0.735851420 | 1.109318185 | -0.780652297 | H | 0.841637462  | -2.288430397 | -0.836487155 | H | 0.873862786  | 1.948414963 | -1.448684330 | C | 0.885409373 | -0.191468773 | -1.289746133 | H | 1.134271572  | -0.343262960 | -2.327061526 | H | -0.780072317 | 0.287382577  | 1.936328307 | H | 0.913831844 | 0.333448457 | 2.344231227 | O | -2.531814986 | -0.041294105 | -0.361281169 | H | -1.980525704 | 0.705934835  | -0.605978334 | H | -1.959563479 | -0.812536895 | -0.373779728 |
| C                                                                                                                                                                                 | 0.226212830                                                                                                                                                                                                                                                                                                                                                                                                                                                                                                                                                                                                                                                                                                                                                                                                                                                                                                                                                                                                                                                                                                                                                                                                                                                                                                                                                                                          | 0.215386678  | 1.491105670  |              |             |   |             |              |             |   |              |             |             |   |             |              |             |   |              |             |             |   |             |              |              |   |             |             |              |   |              |              |              |   |              |             |              |   |             |              |              |   |              |              |              |   |              |              |             |   |             |             |             |   |              |              |              |   |              |              |              |   |              |              |              |
| C                                                                                                                                                                                 | 0.409117635                                                                                                                                                                                                                                                                                                                                                                                                                                                                                                                                                                                                                                                                                                                                                                                                                                                                                                                                                                                                                                                                                                                                                                                                                                                                                                                                                                                          | -1.130449820 | 0.877787890  |              |             |   |             |              |             |   |              |             |             |   |             |              |             |   |              |             |             |   |             |              |              |   |             |             |              |   |              |              |              |   |              |             |              |   |             |              |              |   |              |              |              |   |              |              |             |   |             |             |             |   |              |              |              |   |              |              |              |   |              |              |              |
| C                                                                                                                                                                                 | 0.427836551                                                                                                                                                                                                                                                                                                                                                                                                                                                                                                                                                                                                                                                                                                                                                                                                                                                                                                                                                                                                                                                                                                                                                                                                                                                                                                                                                                                          | 1.329616984  | 0.522271877  |              |             |   |             |              |             |   |              |             |             |   |             |              |             |   |              |             |             |   |             |              |              |   |             |             |              |   |              |              |              |   |              |             |              |   |             |              |              |   |              |              |              |   |              |              |             |   |             |             |             |   |              |              |              |   |              |              |              |   |              |              |              |
| H                                                                                                                                                                                 | 0.285969244                                                                                                                                                                                                                                                                                                                                                                                                                                                                                                                                                                                                                                                                                                                                                                                                                                                                                                                                                                                                                                                                                                                                                                                                                                                                                                                                                                                          | -1.983554975 | 1.528242177  |              |             |   |             |              |             |   |              |             |             |   |             |              |             |   |              |             |             |   |             |              |              |   |             |             |              |   |              |              |              |   |              |             |              |   |             |              |              |   |              |              |              |   |              |              |             |   |             |             |             |   |              |              |              |   |              |              |              |   |              |              |              |
| H                                                                                                                                                                                 | 0.318849174                                                                                                                                                                                                                                                                                                                                                                                                                                                                                                                                                                                                                                                                                                                                                                                                                                                                                                                                                                                                                                                                                                                                                                                                                                                                                                                                                                                          | 2.333699523  | 0.904372418  |              |             |   |             |              |             |   |              |             |             |   |             |              |             |   |              |             |             |   |             |              |              |   |             |             |              |   |              |              |              |   |              |             |              |   |             |              |              |   |              |              |              |   |              |              |             |   |             |             |             |   |              |              |              |   |              |              |              |   |              |              |              |
| C                                                                                                                                                                                 | 0.717623548                                                                                                                                                                                                                                                                                                                                                                                                                                                                                                                                                                                                                                                                                                                                                                                                                                                                                                                                                                                                                                                                                                                                                                                                                                                                                                                                                                                          | -1.292593486 | -0.433601781 |              |             |   |             |              |             |   |              |             |             |   |             |              |             |   |              |             |             |   |             |              |              |   |             |             |              |   |              |              |              |   |              |             |              |   |             |              |              |   |              |              |              |   |              |              |             |   |             |             |             |   |              |              |              |   |              |              |              |   |              |              |              |
| C                                                                                                                                                                                 | 0.735851420                                                                                                                                                                                                                                                                                                                                                                                                                                                                                                                                                                                                                                                                                                                                                                                                                                                                                                                                                                                                                                                                                                                                                                                                                                                                                                                                                                                          | 1.109318185  | -0.780652297 |              |             |   |             |              |             |   |              |             |             |   |             |              |             |   |              |             |             |   |             |              |              |   |             |             |              |   |              |              |              |   |              |             |              |   |             |              |              |   |              |              |              |   |              |              |             |   |             |             |             |   |              |              |              |   |              |              |              |   |              |              |              |
| H                                                                                                                                                                                 | 0.841637462                                                                                                                                                                                                                                                                                                                                                                                                                                                                                                                                                                                                                                                                                                                                                                                                                                                                                                                                                                                                                                                                                                                                                                                                                                                                                                                                                                                          | -2.288430397 | -0.836487155 |              |             |   |             |              |             |   |              |             |             |   |             |              |             |   |              |             |             |   |             |              |              |   |             |             |              |   |              |              |              |   |              |             |              |   |             |              |              |   |              |              |              |   |              |              |             |   |             |             |             |   |              |              |              |   |              |              |              |   |              |              |              |
| H                                                                                                                                                                                 | 0.873862786                                                                                                                                                                                                                                                                                                                                                                                                                                                                                                                                                                                                                                                                                                                                                                                                                                                                                                                                                                                                                                                                                                                                                                                                                                                                                                                                                                                          | 1.948414963  | -1.448684330 |              |             |   |             |              |             |   |              |             |             |   |             |              |             |   |              |             |             |   |             |              |              |   |             |             |              |   |              |              |              |   |              |             |              |   |             |              |              |   |              |              |              |   |              |              |             |   |             |             |             |   |              |              |              |   |              |              |              |   |              |              |              |
| C                                                                                                                                                                                 | 0.885409373                                                                                                                                                                                                                                                                                                                                                                                                                                                                                                                                                                                                                                                                                                                                                                                                                                                                                                                                                                                                                                                                                                                                                                                                                                                                                                                                                                                          | -0.191468773 | -1.289746133 |              |             |   |             |              |             |   |              |             |             |   |             |              |             |   |              |             |             |   |             |              |              |   |             |             |              |   |              |              |              |   |              |             |              |   |             |              |              |   |              |              |              |   |              |              |             |   |             |             |             |   |              |              |              |   |              |              |              |   |              |              |              |
| H                                                                                                                                                                                 | 1.134271572                                                                                                                                                                                                                                                                                                                                                                                                                                                                                                                                                                                                                                                                                                                                                                                                                                                                                                                                                                                                                                                                                                                                                                                                                                                                                                                                                                                          | -0.343262960 | -2.327061526 |              |             |   |             |              |             |   |              |             |             |   |             |              |             |   |              |             |             |   |             |              |              |   |             |             |              |   |              |              |              |   |              |             |              |   |             |              |              |   |              |              |              |   |              |              |             |   |             |             |             |   |              |              |              |   |              |              |              |   |              |              |              |
| H                                                                                                                                                                                 | -0.780072317                                                                                                                                                                                                                                                                                                                                                                                                                                                                                                                                                                                                                                                                                                                                                                                                                                                                                                                                                                                                                                                                                                                                                                                                                                                                                                                                                                                         | 0.287382577  | 1.936328307  |              |             |   |             |              |             |   |              |             |             |   |             |              |             |   |              |             |             |   |             |              |              |   |             |             |              |   |              |              |              |   |              |             |              |   |             |              |              |   |              |              |              |   |              |              |             |   |             |             |             |   |              |              |              |   |              |              |              |   |              |              |              |
| H                                                                                                                                                                                 | 0.913831844                                                                                                                                                                                                                                                                                                                                                                                                                                                                                                                                                                                                                                                                                                                                                                                                                                                                                                                                                                                                                                                                                                                                                                                                                                                                                                                                                                                          | 0.333448457  | 2.344231227  |              |             |   |             |              |             |   |              |             |             |   |             |              |             |   |              |             |             |   |             |              |              |   |             |             |              |   |              |              |              |   |              |             |              |   |             |              |              |   |              |              |              |   |              |              |             |   |             |             |             |   |              |              |              |   |              |              |              |   |              |              |              |
| O                                                                                                                                                                                 | -2.531814986                                                                                                                                                                                                                                                                                                                                                                                                                                                                                                                                                                                                                                                                                                                                                                                                                                                                                                                                                                                                                                                                                                                                                                                                                                                                                                                                                                                         | -0.041294105 | -0.361281169 |              |             |   |             |              |             |   |              |             |             |   |             |              |             |   |              |             |             |   |             |              |              |   |             |             |              |   |              |              |              |   |              |             |              |   |             |              |              |   |              |              |              |   |              |              |             |   |             |             |             |   |              |              |              |   |              |              |              |   |              |              |              |
| H                                                                                                                                                                                 | -1.980525704                                                                                                                                                                                                                                                                                                                                                                                                                                                                                                                                                                                                                                                                                                                                                                                                                                                                                                                                                                                                                                                                                                                                                                                                                                                                                                                                                                                         | 0.705934835  | -0.605978334 |              |             |   |             |              |             |   |              |             |             |   |             |              |             |   |              |             |             |   |             |              |              |   |             |             |              |   |              |              |              |   |              |             |              |   |             |              |              |   |              |              |              |   |              |              |             |   |             |             |             |   |              |              |              |   |              |              |              |   |              |              |              |
| H                                                                                                                                                                                 | -1.959563479                                                                                                                                                                                                                                                                                                                                                                                                                                                                                                                                                                                                                                                                                                                                                                                                                                                                                                                                                                                                                                                                                                                                                                                                                                                                                                                                                                                         | -0.812536895 | -0.373779728 |              |             |   |             |              |             |   |              |             |             |   |             |              |             |   |              |             |             |   |             |              |              |   |             |             |              |   |              |              |              |   |              |             |              |   |             |              |              |   |              |              |              |   |              |              |             |   |             |             |             |   |              |              |              |   |              |              |              |   |              |              |              |
|  <p style="text-align: center;"><b>C2-BzH<sup>+</sup>-W<sub>1</sub></b><br/>[-21.40641021]</p>  | <table border="1"> <tbody> <tr><td>C</td><td>1.291438671</td><td>0.228170977</td><td>1.652218638</td></tr> <tr><td>C</td><td>0.758962916</td><td>-1.056162090</td><td>1.113515175</td></tr> <tr><td>C</td><td>1.110312087</td><td>1.372484177</td><td>0.714422879</td></tr> <tr><td>H</td><td>0.830288031</td><td>-1.920684500</td><td>1.757045237</td></tr> <tr><td>H</td><td>1.449753623</td><td>2.340136763</td><td>1.053842074</td></tr> <tr><td>C</td><td>0.233347198</td><td>-1.155136258</td><td>-0.132565567</td></tr> <tr><td>C</td><td>0.574690931</td><td>1.216232584</td><td>-0.521991776</td></tr> <tr><td>H</td><td>-0.128498927</td><td>-2.108284580</td><td>-0.490670117</td></tr> <tr><td>H</td><td>0.484522768</td><td>2.070721600</td><td>-1.178842647</td></tr> <tr><td>C</td><td>0.143575764</td><td>-0.038849741</td><td>-0.981859596</td></tr> <tr><td>H</td><td>-0.251930389</td><td>-0.148038801</td><td>-1.978606775</td></tr> <tr><td>H</td><td>0.818790337</td><td>0.456504046</td><td>2.622371709</td></tr> <tr><td>H</td><td>2.364674279</td><td>0.111811089</td><td>1.889079274</td></tr> <tr><td>O</td><td>-3.051226357</td><td>-0.437939076</td><td>-1.497678294</td></tr> <tr><td>H</td><td>-3.803628982</td><td>-0.538653034</td><td>-0.907763453</td></tr> <tr><td>H</td><td>-2.334836313</td><td>-0.065424927</td><td>-0.963899573</td></tr> </tbody> </table>  | C            | 1.291438671  | 0.228170977  | 1.652218638 | C | 0.758962916 | -1.056162090 | 1.113515175 | C | 1.110312087  | 1.372484177 | 0.714422879 | H | 0.830288031 | -1.920684500 | 1.757045237 | H | 1.449753623  | 2.340136763 | 1.053842074 | C | 0.233347198 | -1.155136258 | -0.132565567 | C | 0.574690931 | 1.216232584 | -0.521991776 | H | -0.128498927 | -2.108284580 | -0.490670117 | H | 0.484522768  | 2.070721600 | -1.178842647 | C | 0.143575764 | -0.038849741 | -0.981859596 | H | -0.251930389 | -0.148038801 | -1.978606775 | H | 0.818790337  | 0.456504046  | 2.622371709 | H | 2.364674279 | 0.111811089 | 1.889079274 | O | -3.051226357 | -0.437939076 | -1.497678294 | H | -3.803628982 | -0.538653034 | -0.907763453 | H | -2.334836313 | -0.065424927 | -0.963899573 |
| C                                                                                                                                                                                 | 1.291438671                                                                                                                                                                                                                                                                                                                                                                                                                                                                                                                                                                                                                                                                                                                                                                                                                                                                                                                                                                                                                                                                                                                                                                                                                                                                                                                                                                                          | 0.228170977  | 1.652218638  |              |             |   |             |              |             |   |              |             |             |   |             |              |             |   |              |             |             |   |             |              |              |   |             |             |              |   |              |              |              |   |              |             |              |   |             |              |              |   |              |              |              |   |              |              |             |   |             |             |             |   |              |              |              |   |              |              |              |   |              |              |              |
| C                                                                                                                                                                                 | 0.758962916                                                                                                                                                                                                                                                                                                                                                                                                                                                                                                                                                                                                                                                                                                                                                                                                                                                                                                                                                                                                                                                                                                                                                                                                                                                                                                                                                                                          | -1.056162090 | 1.113515175  |              |             |   |             |              |             |   |              |             |             |   |             |              |             |   |              |             |             |   |             |              |              |   |             |             |              |   |              |              |              |   |              |             |              |   |             |              |              |   |              |              |              |   |              |              |             |   |             |             |             |   |              |              |              |   |              |              |              |   |              |              |              |
| C                                                                                                                                                                                 | 1.110312087                                                                                                                                                                                                                                                                                                                                                                                                                                                                                                                                                                                                                                                                                                                                                                                                                                                                                                                                                                                                                                                                                                                                                                                                                                                                                                                                                                                          | 1.372484177  | 0.714422879  |              |             |   |             |              |             |   |              |             |             |   |             |              |             |   |              |             |             |   |             |              |              |   |             |             |              |   |              |              |              |   |              |             |              |   |             |              |              |   |              |              |              |   |              |              |             |   |             |             |             |   |              |              |              |   |              |              |              |   |              |              |              |
| H                                                                                                                                                                                 | 0.830288031                                                                                                                                                                                                                                                                                                                                                                                                                                                                                                                                                                                                                                                                                                                                                                                                                                                                                                                                                                                                                                                                                                                                                                                                                                                                                                                                                                                          | -1.920684500 | 1.757045237  |              |             |   |             |              |             |   |              |             |             |   |             |              |             |   |              |             |             |   |             |              |              |   |             |             |              |   |              |              |              |   |              |             |              |   |             |              |              |   |              |              |              |   |              |              |             |   |             |             |             |   |              |              |              |   |              |              |              |   |              |              |              |
| H                                                                                                                                                                                 | 1.449753623                                                                                                                                                                                                                                                                                                                                                                                                                                                                                                                                                                                                                                                                                                                                                                                                                                                                                                                                                                                                                                                                                                                                                                                                                                                                                                                                                                                          | 2.340136763  | 1.053842074  |              |             |   |             |              |             |   |              |             |             |   |             |              |             |   |              |             |             |   |             |              |              |   |             |             |              |   |              |              |              |   |              |             |              |   |             |              |              |   |              |              |              |   |              |              |             |   |             |             |             |   |              |              |              |   |              |              |              |   |              |              |              |
| C                                                                                                                                                                                 | 0.233347198                                                                                                                                                                                                                                                                                                                                                                                                                                                                                                                                                                                                                                                                                                                                                                                                                                                                                                                                                                                                                                                                                                                                                                                                                                                                                                                                                                                          | -1.155136258 | -0.132565567 |              |             |   |             |              |             |   |              |             |             |   |             |              |             |   |              |             |             |   |             |              |              |   |             |             |              |   |              |              |              |   |              |             |              |   |             |              |              |   |              |              |              |   |              |              |             |   |             |             |             |   |              |              |              |   |              |              |              |   |              |              |              |
| C                                                                                                                                                                                 | 0.574690931                                                                                                                                                                                                                                                                                                                                                                                                                                                                                                                                                                                                                                                                                                                                                                                                                                                                                                                                                                                                                                                                                                                                                                                                                                                                                                                                                                                          | 1.216232584  | -0.521991776 |              |             |   |             |              |             |   |              |             |             |   |             |              |             |   |              |             |             |   |             |              |              |   |             |             |              |   |              |              |              |   |              |             |              |   |             |              |              |   |              |              |              |   |              |              |             |   |             |             |             |   |              |              |              |   |              |              |              |   |              |              |              |
| H                                                                                                                                                                                 | -0.128498927                                                                                                                                                                                                                                                                                                                                                                                                                                                                                                                                                                                                                                                                                                                                                                                                                                                                                                                                                                                                                                                                                                                                                                                                                                                                                                                                                                                         | -2.108284580 | -0.490670117 |              |             |   |             |              |             |   |              |             |             |   |             |              |             |   |              |             |             |   |             |              |              |   |             |             |              |   |              |              |              |   |              |             |              |   |             |              |              |   |              |              |              |   |              |              |             |   |             |             |             |   |              |              |              |   |              |              |              |   |              |              |              |
| H                                                                                                                                                                                 | 0.484522768                                                                                                                                                                                                                                                                                                                                                                                                                                                                                                                                                                                                                                                                                                                                                                                                                                                                                                                                                                                                                                                                                                                                                                                                                                                                                                                                                                                          | 2.070721600  | -1.178842647 |              |             |   |             |              |             |   |              |             |             |   |             |              |             |   |              |             |             |   |             |              |              |   |             |             |              |   |              |              |              |   |              |             |              |   |             |              |              |   |              |              |              |   |              |              |             |   |             |             |             |   |              |              |              |   |              |              |              |   |              |              |              |
| C                                                                                                                                                                                 | 0.143575764                                                                                                                                                                                                                                                                                                                                                                                                                                                                                                                                                                                                                                                                                                                                                                                                                                                                                                                                                                                                                                                                                                                                                                                                                                                                                                                                                                                          | -0.038849741 | -0.981859596 |              |             |   |             |              |             |   |              |             |             |   |             |              |             |   |              |             |             |   |             |              |              |   |             |             |              |   |              |              |              |   |              |             |              |   |             |              |              |   |              |              |              |   |              |              |             |   |             |             |             |   |              |              |              |   |              |              |              |   |              |              |              |
| H                                                                                                                                                                                 | -0.251930389                                                                                                                                                                                                                                                                                                                                                                                                                                                                                                                                                                                                                                                                                                                                                                                                                                                                                                                                                                                                                                                                                                                                                                                                                                                                                                                                                                                         | -0.148038801 | -1.978606775 |              |             |   |             |              |             |   |              |             |             |   |             |              |             |   |              |             |             |   |             |              |              |   |             |             |              |   |              |              |              |   |              |             |              |   |             |              |              |   |              |              |              |   |              |              |             |   |             |             |             |   |              |              |              |   |              |              |              |   |              |              |              |
| H                                                                                                                                                                                 | 0.818790337                                                                                                                                                                                                                                                                                                                                                                                                                                                                                                                                                                                                                                                                                                                                                                                                                                                                                                                                                                                                                                                                                                                                                                                                                                                                                                                                                                                          | 0.456504046  | 2.622371709  |              |             |   |             |              |             |   |              |             |             |   |             |              |             |   |              |             |             |   |             |              |              |   |             |             |              |   |              |              |              |   |              |             |              |   |             |              |              |   |              |              |              |   |              |              |             |   |             |             |             |   |              |              |              |   |              |              |              |   |              |              |              |
| H                                                                                                                                                                                 | 2.364674279                                                                                                                                                                                                                                                                                                                                                                                                                                                                                                                                                                                                                                                                                                                                                                                                                                                                                                                                                                                                                                                                                                                                                                                                                                                                                                                                                                                          | 0.111811089  | 1.889079274  |              |             |   |             |              |             |   |              |             |             |   |             |              |             |   |              |             |             |   |             |              |              |   |             |             |              |   |              |              |              |   |              |             |              |   |             |              |              |   |              |              |              |   |              |              |             |   |             |             |             |   |              |              |              |   |              |              |              |   |              |              |              |
| O                                                                                                                                                                                 | -3.051226357                                                                                                                                                                                                                                                                                                                                                                                                                                                                                                                                                                                                                                                                                                                                                                                                                                                                                                                                                                                                                                                                                                                                                                                                                                                                                                                                                                                         | -0.437939076 | -1.497678294 |              |             |   |             |              |             |   |              |             |             |   |             |              |             |   |              |             |             |   |             |              |              |   |             |             |              |   |              |              |              |   |              |             |              |   |             |              |              |   |              |              |              |   |              |              |             |   |             |             |             |   |              |              |              |   |              |              |              |   |              |              |              |
| H                                                                                                                                                                                 | -3.803628982                                                                                                                                                                                                                                                                                                                                                                                                                                                                                                                                                                                                                                                                                                                                                                                                                                                                                                                                                                                                                                                                                                                                                                                                                                                                                                                                                                                         | -0.538653034 | -0.907763453 |              |             |   |             |              |             |   |              |             |             |   |             |              |             |   |              |             |             |   |             |              |              |   |             |             |              |   |              |              |              |   |              |             |              |   |             |              |              |   |              |              |              |   |              |              |             |   |             |             |             |   |              |              |              |   |              |              |              |   |              |              |              |
| H                                                                                                                                                                                 | -2.334836313                                                                                                                                                                                                                                                                                                                                                                                                                                                                                                                                                                                                                                                                                                                                                                                                                                                                                                                                                                                                                                                                                                                                                                                                                                                                                                                                                                                         | -0.065424927 | -0.963899573 |              |             |   |             |              |             |   |              |             |             |   |             |              |             |   |              |             |             |   |             |              |              |   |             |             |              |   |              |              |              |   |              |             |              |   |             |              |              |   |              |              |              |   |              |              |             |   |             |             |             |   |              |              |              |   |              |              |              |   |              |              |              |
|  <p style="text-align: center;"><b>C3-BzH<sup>+</sup>-W<sub>1</sub></b><br/>[-21.40589435]</p> | <table border="1"> <tbody> <tr><td>C</td><td>0.242847787</td><td>-0.335559561</td><td>1.449250083</td></tr> <tr><td>C</td><td>1.521194418</td><td>-1.014149442</td><td>1.095276016</td></tr> <tr><td>C</td><td>-0.399762203</td><td>0.345548939</td><td>0.290485663</td></tr> <tr><td>H</td><td>2.039104798</td><td>-1.526747755</td><td>1.892680553</td></tr> <tr><td>H</td><td>-1.331445168</td><td>0.855691813</td><td>0.482364584</td></tr> <tr><td>C</td><td>2.023691597</td><td>-0.997037868</td><td>-0.163735096</td></tr> <tr><td>C</td><td>0.150457987</td><td>0.328840464</td><td>-0.948604262</td></tr> <tr><td>H</td><td>2.955781117</td><td>-1.502760209</td><td>-0.376305948</td></tr> <tr><td>H</td><td>-0.346244889</td><td>0.838552772</td><td>-1.763631380</td></tr> <tr><td>C</td><td>1.360932107</td><td>-0.333636961</td><td>-1.208222215</td></tr> <tr><td>H</td><td>1.779176589</td><td>-0.332303971</td><td>-2.201890887</td></tr> <tr><td>H</td><td>-0.459263996</td><td>-1.064834309</td><td>1.886489141</td></tr> <tr><td>H</td><td>0.418525325</td><td>0.394012968</td><td>2.257151911</td></tr> <tr><td>O</td><td>-3.551516599</td><td>1.467877346</td><td>-0.401177000</td></tr> <tr><td>H</td><td>-3.603593454</td><td>2.240497962</td><td>-0.967148182</td></tr> <tr><td>H</td><td>-3.460273894</td><td>0.701960840</td><td>-0.972057191</td></tr> </tbody> </table> | C            | 0.242847787  | -0.335559561 | 1.449250083 | C | 1.521194418 | -1.014149442 | 1.095276016 | C | -0.399762203 | 0.345548939 | 0.290485663 | H | 2.039104798 | -1.526747755 | 1.892680553 | H | -1.331445168 | 0.855691813 | 0.482364584 | C | 2.023691597 | -0.997037868 | -0.163735096 | C | 0.150457987 | 0.328840464 | -0.948604262 | H | 2.955781117  | -1.502760209 | -0.376305948 | H | -0.346244889 | 0.838552772 | -1.763631380 | C | 1.360932107 | -0.333636961 | -1.208222215 | H | 1.779176589  | -0.332303971 | -2.201890887 | H | -0.459263996 | -1.064834309 | 1.886489141 | H | 0.418525325 | 0.394012968 | 2.257151911 | O | -3.551516599 | 1.467877346  | -0.401177000 | H | -3.603593454 | 2.240497962  | -0.967148182 | H | -3.460273894 | 0.701960840  | -0.972057191 |
| C                                                                                                                                                                                 | 0.242847787                                                                                                                                                                                                                                                                                                                                                                                                                                                                                                                                                                                                                                                                                                                                                                                                                                                                                                                                                                                                                                                                                                                                                                                                                                                                                                                                                                                          | -0.335559561 | 1.449250083  |              |             |   |             |              |             |   |              |             |             |   |             |              |             |   |              |             |             |   |             |              |              |   |             |             |              |   |              |              |              |   |              |             |              |   |             |              |              |   |              |              |              |   |              |              |             |   |             |             |             |   |              |              |              |   |              |              |              |   |              |              |              |
| C                                                                                                                                                                                 | 1.521194418                                                                                                                                                                                                                                                                                                                                                                                                                                                                                                                                                                                                                                                                                                                                                                                                                                                                                                                                                                                                                                                                                                                                                                                                                                                                                                                                                                                          | -1.014149442 | 1.095276016  |              |             |   |             |              |             |   |              |             |             |   |             |              |             |   |              |             |             |   |             |              |              |   |             |             |              |   |              |              |              |   |              |             |              |   |             |              |              |   |              |              |              |   |              |              |             |   |             |             |             |   |              |              |              |   |              |              |              |   |              |              |              |
| C                                                                                                                                                                                 | -0.399762203                                                                                                                                                                                                                                                                                                                                                                                                                                                                                                                                                                                                                                                                                                                                                                                                                                                                                                                                                                                                                                                                                                                                                                                                                                                                                                                                                                                         | 0.345548939  | 0.290485663  |              |             |   |             |              |             |   |              |             |             |   |             |              |             |   |              |             |             |   |             |              |              |   |             |             |              |   |              |              |              |   |              |             |              |   |             |              |              |   |              |              |              |   |              |              |             |   |             |             |             |   |              |              |              |   |              |              |              |   |              |              |              |
| H                                                                                                                                                                                 | 2.039104798                                                                                                                                                                                                                                                                                                                                                                                                                                                                                                                                                                                                                                                                                                                                                                                                                                                                                                                                                                                                                                                                                                                                                                                                                                                                                                                                                                                          | -1.526747755 | 1.892680553  |              |             |   |             |              |             |   |              |             |             |   |             |              |             |   |              |             |             |   |             |              |              |   |             |             |              |   |              |              |              |   |              |             |              |   |             |              |              |   |              |              |              |   |              |              |             |   |             |             |             |   |              |              |              |   |              |              |              |   |              |              |              |
| H                                                                                                                                                                                 | -1.331445168                                                                                                                                                                                                                                                                                                                                                                                                                                                                                                                                                                                                                                                                                                                                                                                                                                                                                                                                                                                                                                                                                                                                                                                                                                                                                                                                                                                         | 0.855691813  | 0.482364584  |              |             |   |             |              |             |   |              |             |             |   |             |              |             |   |              |             |             |   |             |              |              |   |             |             |              |   |              |              |              |   |              |             |              |   |             |              |              |   |              |              |              |   |              |              |             |   |             |             |             |   |              |              |              |   |              |              |              |   |              |              |              |
| C                                                                                                                                                                                 | 2.023691597                                                                                                                                                                                                                                                                                                                                                                                                                                                                                                                                                                                                                                                                                                                                                                                                                                                                                                                                                                                                                                                                                                                                                                                                                                                                                                                                                                                          | -0.997037868 | -0.163735096 |              |             |   |             |              |             |   |              |             |             |   |             |              |             |   |              |             |             |   |             |              |              |   |             |             |              |   |              |              |              |   |              |             |              |   |             |              |              |   |              |              |              |   |              |              |             |   |             |             |             |   |              |              |              |   |              |              |              |   |              |              |              |
| C                                                                                                                                                                                 | 0.150457987                                                                                                                                                                                                                                                                                                                                                                                                                                                                                                                                                                                                                                                                                                                                                                                                                                                                                                                                                                                                                                                                                                                                                                                                                                                                                                                                                                                          | 0.328840464  | -0.948604262 |              |             |   |             |              |             |   |              |             |             |   |             |              |             |   |              |             |             |   |             |              |              |   |             |             |              |   |              |              |              |   |              |             |              |   |             |              |              |   |              |              |              |   |              |              |             |   |             |             |             |   |              |              |              |   |              |              |              |   |              |              |              |
| H                                                                                                                                                                                 | 2.955781117                                                                                                                                                                                                                                                                                                                                                                                                                                                                                                                                                                                                                                                                                                                                                                                                                                                                                                                                                                                                                                                                                                                                                                                                                                                                                                                                                                                          | -1.502760209 | -0.376305948 |              |             |   |             |              |             |   |              |             |             |   |             |              |             |   |              |             |             |   |             |              |              |   |             |             |              |   |              |              |              |   |              |             |              |   |             |              |              |   |              |              |              |   |              |              |             |   |             |             |             |   |              |              |              |   |              |              |              |   |              |              |              |
| H                                                                                                                                                                                 | -0.346244889                                                                                                                                                                                                                                                                                                                                                                                                                                                                                                                                                                                                                                                                                                                                                                                                                                                                                                                                                                                                                                                                                                                                                                                                                                                                                                                                                                                         | 0.838552772  | -1.763631380 |              |             |   |             |              |             |   |              |             |             |   |             |              |             |   |              |             |             |   |             |              |              |   |             |             |              |   |              |              |              |   |              |             |              |   |             |              |              |   |              |              |              |   |              |              |             |   |             |             |             |   |              |              |              |   |              |              |              |   |              |              |              |
| C                                                                                                                                                                                 | 1.360932107                                                                                                                                                                                                                                                                                                                                                                                                                                                                                                                                                                                                                                                                                                                                                                                                                                                                                                                                                                                                                                                                                                                                                                                                                                                                                                                                                                                          | -0.333636961 | -1.208222215 |              |             |   |             |              |             |   |              |             |             |   |             |              |             |   |              |             |             |   |             |              |              |   |             |             |              |   |              |              |              |   |              |             |              |   |             |              |              |   |              |              |              |   |              |              |             |   |             |             |             |   |              |              |              |   |              |              |              |   |              |              |              |
| H                                                                                                                                                                                 | 1.779176589                                                                                                                                                                                                                                                                                                                                                                                                                                                                                                                                                                                                                                                                                                                                                                                                                                                                                                                                                                                                                                                                                                                                                                                                                                                                                                                                                                                          | -0.332303971 | -2.201890887 |              |             |   |             |              |             |   |              |             |             |   |             |              |             |   |              |             |             |   |             |              |              |   |             |             |              |   |              |              |              |   |              |             |              |   |             |              |              |   |              |              |              |   |              |              |             |   |             |             |             |   |              |              |              |   |              |              |              |   |              |              |              |
| H                                                                                                                                                                                 | -0.459263996                                                                                                                                                                                                                                                                                                                                                                                                                                                                                                                                                                                                                                                                                                                                                                                                                                                                                                                                                                                                                                                                                                                                                                                                                                                                                                                                                                                         | -1.064834309 | 1.886489141  |              |             |   |             |              |             |   |              |             |             |   |             |              |             |   |              |             |             |   |             |              |              |   |             |             |              |   |              |              |              |   |              |             |              |   |             |              |              |   |              |              |              |   |              |              |             |   |             |             |             |   |              |              |              |   |              |              |              |   |              |              |              |
| H                                                                                                                                                                                 | 0.418525325                                                                                                                                                                                                                                                                                                                                                                                                                                                                                                                                                                                                                                                                                                                                                                                                                                                                                                                                                                                                                                                                                                                                                                                                                                                                                                                                                                                          | 0.394012968  | 2.257151911  |              |             |   |             |              |             |   |              |             |             |   |             |              |             |   |              |             |             |   |             |              |              |   |             |             |              |   |              |              |              |   |              |             |              |   |             |              |              |   |              |              |              |   |              |              |             |   |             |             |             |   |              |              |              |   |              |              |              |   |              |              |              |
| O                                                                                                                                                                                 | -3.551516599                                                                                                                                                                                                                                                                                                                                                                                                                                                                                                                                                                                                                                                                                                                                                                                                                                                                                                                                                                                                                                                                                                                                                                                                                                                                                                                                                                                         | 1.467877346  | -0.401177000 |              |             |   |             |              |             |   |              |             |             |   |             |              |             |   |              |             |             |   |             |              |              |   |             |             |              |   |              |              |              |   |              |             |              |   |             |              |              |   |              |              |              |   |              |              |             |   |             |             |             |   |              |              |              |   |              |              |              |   |              |              |              |
| H                                                                                                                                                                                 | -3.603593454                                                                                                                                                                                                                                                                                                                                                                                                                                                                                                                                                                                                                                                                                                                                                                                                                                                                                                                                                                                                                                                                                                                                                                                                                                                                                                                                                                                         | 2.240497962  | -0.967148182 |              |             |   |             |              |             |   |              |             |             |   |             |              |             |   |              |             |             |   |             |              |              |   |             |             |              |   |              |              |              |   |              |             |              |   |             |              |              |   |              |              |              |   |              |              |             |   |             |             |             |   |              |              |              |   |              |              |              |   |              |              |              |
| H                                                                                                                                                                                 | -3.460273894                                                                                                                                                                                                                                                                                                                                                                                                                                                                                                                                                                                                                                                                                                                                                                                                                                                                                                                                                                                                                                                                                                                                                                                                                                                                                                                                                                                         | 0.701960840  | -0.972057191 |              |             |   |             |              |             |   |              |             |             |   |             |              |             |   |              |             |             |   |             |              |              |   |             |             |              |   |              |              |              |   |              |             |              |   |             |              |              |   |              |              |              |   |              |              |             |   |             |             |             |   |              |              |              |   |              |              |              |   |              |              |              |
|  <p style="text-align: right; color: blue;">S7</p>                                             | <table border="1"> <tbody> <tr><td>C</td><td>-0.060326822</td><td>-1.455697158</td><td>0.026364935</td></tr> </tbody> </table>                                                                                                                                                                                                                                                                                                                                                                                                                                                                                                                                                                                                                                                                                                                                                                                                                                                                                                                                                                                                                                                                                                                                                                                                                                                                       | C            | -0.060326822 | -1.455697158 | 0.026364935 |   |             |              |             |   |              |             |             |   |             |              |             |   |              |             |             |   |             |              |              |   |             |             |              |   |              |              |              |   |              |             |              |   |             |              |              |   |              |              |              |   |              |              |             |   |             |             |             |   |              |              |              |   |              |              |              |   |              |              |              |
| C                                                                                                                                                                                 | -0.060326822                                                                                                                                                                                                                                                                                                                                                                                                                                                                                                                                                                                                                                                                                                                                                                                                                                                                                                                                                                                                                                                                                                                                                                                                                                                                                                                                                                                         | -1.455697158 | 0.026364935  |              |             |   |             |              |             |   |              |             |             |   |             |              |             |   |              |             |             |   |             |              |              |   |             |             |              |   |              |              |              |   |              |             |              |   |             |              |              |   |              |              |              |   |              |              |             |   |             |             |             |   |              |              |              |   |              |              |              |   |              |              |              |

|                                                                                                                                                                                                                             |                                                                                                                                                                                                                                                                                                                                                                                                                                                                                                                                                                                                                                                                                                                                                                                                                                                                                                                                                                                                                                                                                                                                                                                                                                                                                                                                                                                                                                                                                                                                                                                                                                                            |              |              |              |              |   |              |              |              |   |              |              |              |   |              |              |              |   |              |              |              |   |              |              |              |   |              |             |              |   |              |              |              |   |              |             |             |   |              |             |              |   |              |              |              |   |              |              |              |   |              |              |              |   |             |              |              |   |             |              |              |   |             |              |              |   |             |              |              |   |             |              |              |   |             |             |              |
|-----------------------------------------------------------------------------------------------------------------------------------------------------------------------------------------------------------------------------|------------------------------------------------------------------------------------------------------------------------------------------------------------------------------------------------------------------------------------------------------------------------------------------------------------------------------------------------------------------------------------------------------------------------------------------------------------------------------------------------------------------------------------------------------------------------------------------------------------------------------------------------------------------------------------------------------------------------------------------------------------------------------------------------------------------------------------------------------------------------------------------------------------------------------------------------------------------------------------------------------------------------------------------------------------------------------------------------------------------------------------------------------------------------------------------------------------------------------------------------------------------------------------------------------------------------------------------------------------------------------------------------------------------------------------------------------------------------------------------------------------------------------------------------------------------------------------------------------------------------------------------------------------|--------------|--------------|--------------|--------------|---|--------------|--------------|--------------|---|--------------|--------------|--------------|---|--------------|--------------|--------------|---|--------------|--------------|--------------|---|--------------|--------------|--------------|---|--------------|-------------|--------------|---|--------------|--------------|--------------|---|--------------|-------------|-------------|---|--------------|-------------|--------------|---|--------------|--------------|--------------|---|--------------|--------------|--------------|---|--------------|--------------|--------------|---|-------------|--------------|--------------|---|-------------|--------------|--------------|---|-------------|--------------|--------------|---|-------------|--------------|--------------|---|-------------|--------------|--------------|---|-------------|-------------|--------------|
| <p style="text-align: center;"><b>C1-BzH<sup>+</sup>-W<sub>2</sub></b><br/><b>[-26.49150944]</b></p>                                                                                                                        | <table border="0"> <tbody> <tr><td>C</td><td>-0.643636352</td><td>-0.874739298</td><td>-1.213643805</td></tr> <tr><td>C</td><td>-0.527586354</td><td>-0.774419371</td><td>1.264824620</td></tr> <tr><td>H</td><td>-0.366350986</td><td>-1.340425059</td><td>-2.147240407</td></tr> <tr><td>H</td><td>-0.164428192</td><td>-1.164158534</td><td>2.203660968</td></tr> <tr><td>C</td><td>-1.482062379</td><td>0.191600859</td><td>-1.190479895</td></tr> <tr><td>C</td><td>-1.367198546</td><td>0.292082368</td><td>1.232841250</td></tr> <tr><td>H</td><td>-1.881599573</td><td>0.582858846</td><td>-2.116449500</td></tr> <tr><td>H</td><td>-1.678972041</td><td>0.759754082</td><td>2.156964575</td></tr> <tr><td>C</td><td>-1.858416219</td><td>0.803247386</td><td>0.018096038</td></tr> <tr><td>H</td><td>-2.532368863</td><td>1.644357572</td><td>0.015685953</td></tr> <tr><td>H</td><td>-0.285449471</td><td>-2.532046938</td><td>0.080294854</td></tr> <tr><td>H</td><td>1.040541942</td><td>-1.412101631</td><td>-0.027067137</td></tr> <tr><td>O</td><td>1.315219387</td><td>1.789591433</td><td>-0.064765605</td></tr> <tr><td>H</td><td>0.996778699</td><td>1.851048769</td><td>-0.968475862</td></tr> <tr><td>H</td><td>0.589246631</td><td>1.421756102</td><td>0.452219138</td></tr> <tr><td>H</td><td>2.532611337</td><td>0.423780861</td><td>-0.029124834</td></tr> <tr><td>H</td><td>3.886586165</td><td>-0.242561323</td><td>0.304353535</td></tr> <tr><td>O</td><td>3.008853816</td><td>-0.424359105</td><td>-0.034099548</td></tr> </tbody> </table>                                                                                   | C            | -0.643636352 | -0.874739298 | -1.213643805 | C | -0.527586354 | -0.774419371 | 1.264824620  | H | -0.366350986 | -1.340425059 | -2.147240407 | H | -0.164428192 | -1.164158534 | 2.203660968  | C | -1.482062379 | 0.191600859  | -1.190479895 | C | -1.367198546 | 0.292082368  | 1.232841250  | H | -1.881599573 | 0.582858846 | -2.116449500 | H | -1.678972041 | 0.759754082  | 2.156964575  | C | -1.858416219 | 0.803247386 | 0.018096038 | H | -2.532368863 | 1.644357572 | 0.015685953  | H | -0.285449471 | -2.532046938 | 0.080294854  | H | 1.040541942  | -1.412101631 | -0.027067137 | O | 1.315219387  | 1.789591433  | -0.064765605 | H | 0.996778699 | 1.851048769  | -0.968475862 | H | 0.589246631 | 1.421756102  | 0.452219138  | H | 2.532611337 | 0.423780861  | -0.029124834 | H | 3.886586165 | -0.242561323 | 0.304353535  | O | 3.008853816 | -0.424359105 | -0.034099548 |   |             |             |              |
| C                                                                                                                                                                                                                           | -0.643636352                                                                                                                                                                                                                                                                                                                                                                                                                                                                                                                                                                                                                                                                                                                                                                                                                                                                                                                                                                                                                                                                                                                                                                                                                                                                                                                                                                                                                                                                                                                                                                                                                                               | -0.874739298 | -1.213643805 |              |              |   |              |              |              |   |              |              |              |   |              |              |              |   |              |              |              |   |              |              |              |   |              |             |              |   |              |              |              |   |              |             |             |   |              |             |              |   |              |              |              |   |              |              |              |   |              |              |              |   |             |              |              |   |             |              |              |   |             |              |              |   |             |              |              |   |             |              |              |   |             |             |              |
| C                                                                                                                                                                                                                           | -0.527586354                                                                                                                                                                                                                                                                                                                                                                                                                                                                                                                                                                                                                                                                                                                                                                                                                                                                                                                                                                                                                                                                                                                                                                                                                                                                                                                                                                                                                                                                                                                                                                                                                                               | -0.774419371 | 1.264824620  |              |              |   |              |              |              |   |              |              |              |   |              |              |              |   |              |              |              |   |              |              |              |   |              |             |              |   |              |              |              |   |              |             |             |   |              |             |              |   |              |              |              |   |              |              |              |   |              |              |              |   |             |              |              |   |             |              |              |   |             |              |              |   |             |              |              |   |             |              |              |   |             |             |              |
| H                                                                                                                                                                                                                           | -0.366350986                                                                                                                                                                                                                                                                                                                                                                                                                                                                                                                                                                                                                                                                                                                                                                                                                                                                                                                                                                                                                                                                                                                                                                                                                                                                                                                                                                                                                                                                                                                                                                                                                                               | -1.340425059 | -2.147240407 |              |              |   |              |              |              |   |              |              |              |   |              |              |              |   |              |              |              |   |              |              |              |   |              |             |              |   |              |              |              |   |              |             |             |   |              |             |              |   |              |              |              |   |              |              |              |   |              |              |              |   |             |              |              |   |             |              |              |   |             |              |              |   |             |              |              |   |             |              |              |   |             |             |              |
| H                                                                                                                                                                                                                           | -0.164428192                                                                                                                                                                                                                                                                                                                                                                                                                                                                                                                                                                                                                                                                                                                                                                                                                                                                                                                                                                                                                                                                                                                                                                                                                                                                                                                                                                                                                                                                                                                                                                                                                                               | -1.164158534 | 2.203660968  |              |              |   |              |              |              |   |              |              |              |   |              |              |              |   |              |              |              |   |              |              |              |   |              |             |              |   |              |              |              |   |              |             |             |   |              |             |              |   |              |              |              |   |              |              |              |   |              |              |              |   |             |              |              |   |             |              |              |   |             |              |              |   |             |              |              |   |             |              |              |   |             |             |              |
| C                                                                                                                                                                                                                           | -1.482062379                                                                                                                                                                                                                                                                                                                                                                                                                                                                                                                                                                                                                                                                                                                                                                                                                                                                                                                                                                                                                                                                                                                                                                                                                                                                                                                                                                                                                                                                                                                                                                                                                                               | 0.191600859  | -1.190479895 |              |              |   |              |              |              |   |              |              |              |   |              |              |              |   |              |              |              |   |              |              |              |   |              |             |              |   |              |              |              |   |              |             |             |   |              |             |              |   |              |              |              |   |              |              |              |   |              |              |              |   |             |              |              |   |             |              |              |   |             |              |              |   |             |              |              |   |             |              |              |   |             |             |              |
| C                                                                                                                                                                                                                           | -1.367198546                                                                                                                                                                                                                                                                                                                                                                                                                                                                                                                                                                                                                                                                                                                                                                                                                                                                                                                                                                                                                                                                                                                                                                                                                                                                                                                                                                                                                                                                                                                                                                                                                                               | 0.292082368  | 1.232841250  |              |              |   |              |              |              |   |              |              |              |   |              |              |              |   |              |              |              |   |              |              |              |   |              |             |              |   |              |              |              |   |              |             |             |   |              |             |              |   |              |              |              |   |              |              |              |   |              |              |              |   |             |              |              |   |             |              |              |   |             |              |              |   |             |              |              |   |             |              |              |   |             |             |              |
| H                                                                                                                                                                                                                           | -1.881599573                                                                                                                                                                                                                                                                                                                                                                                                                                                                                                                                                                                                                                                                                                                                                                                                                                                                                                                                                                                                                                                                                                                                                                                                                                                                                                                                                                                                                                                                                                                                                                                                                                               | 0.582858846  | -2.116449500 |              |              |   |              |              |              |   |              |              |              |   |              |              |              |   |              |              |              |   |              |              |              |   |              |             |              |   |              |              |              |   |              |             |             |   |              |             |              |   |              |              |              |   |              |              |              |   |              |              |              |   |             |              |              |   |             |              |              |   |             |              |              |   |             |              |              |   |             |              |              |   |             |             |              |
| H                                                                                                                                                                                                                           | -1.678972041                                                                                                                                                                                                                                                                                                                                                                                                                                                                                                                                                                                                                                                                                                                                                                                                                                                                                                                                                                                                                                                                                                                                                                                                                                                                                                                                                                                                                                                                                                                                                                                                                                               | 0.759754082  | 2.156964575  |              |              |   |              |              |              |   |              |              |              |   |              |              |              |   |              |              |              |   |              |              |              |   |              |             |              |   |              |              |              |   |              |             |             |   |              |             |              |   |              |              |              |   |              |              |              |   |              |              |              |   |             |              |              |   |             |              |              |   |             |              |              |   |             |              |              |   |             |              |              |   |             |             |              |
| C                                                                                                                                                                                                                           | -1.858416219                                                                                                                                                                                                                                                                                                                                                                                                                                                                                                                                                                                                                                                                                                                                                                                                                                                                                                                                                                                                                                                                                                                                                                                                                                                                                                                                                                                                                                                                                                                                                                                                                                               | 0.803247386  | 0.018096038  |              |              |   |              |              |              |   |              |              |              |   |              |              |              |   |              |              |              |   |              |              |              |   |              |             |              |   |              |              |              |   |              |             |             |   |              |             |              |   |              |              |              |   |              |              |              |   |              |              |              |   |             |              |              |   |             |              |              |   |             |              |              |   |             |              |              |   |             |              |              |   |             |             |              |
| H                                                                                                                                                                                                                           | -2.532368863                                                                                                                                                                                                                                                                                                                                                                                                                                                                                                                                                                                                                                                                                                                                                                                                                                                                                                                                                                                                                                                                                                                                                                                                                                                                                                                                                                                                                                                                                                                                                                                                                                               | 1.644357572  | 0.015685953  |              |              |   |              |              |              |   |              |              |              |   |              |              |              |   |              |              |              |   |              |              |              |   |              |             |              |   |              |              |              |   |              |             |             |   |              |             |              |   |              |              |              |   |              |              |              |   |              |              |              |   |             |              |              |   |             |              |              |   |             |              |              |   |             |              |              |   |             |              |              |   |             |             |              |
| H                                                                                                                                                                                                                           | -0.285449471                                                                                                                                                                                                                                                                                                                                                                                                                                                                                                                                                                                                                                                                                                                                                                                                                                                                                                                                                                                                                                                                                                                                                                                                                                                                                                                                                                                                                                                                                                                                                                                                                                               | -2.532046938 | 0.080294854  |              |              |   |              |              |              |   |              |              |              |   |              |              |              |   |              |              |              |   |              |              |              |   |              |             |              |   |              |              |              |   |              |             |             |   |              |             |              |   |              |              |              |   |              |              |              |   |              |              |              |   |             |              |              |   |             |              |              |   |             |              |              |   |             |              |              |   |             |              |              |   |             |             |              |
| H                                                                                                                                                                                                                           | 1.040541942                                                                                                                                                                                                                                                                                                                                                                                                                                                                                                                                                                                                                                                                                                                                                                                                                                                                                                                                                                                                                                                                                                                                                                                                                                                                                                                                                                                                                                                                                                                                                                                                                                                | -1.412101631 | -0.027067137 |              |              |   |              |              |              |   |              |              |              |   |              |              |              |   |              |              |              |   |              |              |              |   |              |             |              |   |              |              |              |   |              |             |             |   |              |             |              |   |              |              |              |   |              |              |              |   |              |              |              |   |             |              |              |   |             |              |              |   |             |              |              |   |             |              |              |   |             |              |              |   |             |             |              |
| O                                                                                                                                                                                                                           | 1.315219387                                                                                                                                                                                                                                                                                                                                                                                                                                                                                                                                                                                                                                                                                                                                                                                                                                                                                                                                                                                                                                                                                                                                                                                                                                                                                                                                                                                                                                                                                                                                                                                                                                                | 1.789591433  | -0.064765605 |              |              |   |              |              |              |   |              |              |              |   |              |              |              |   |              |              |              |   |              |              |              |   |              |             |              |   |              |              |              |   |              |             |             |   |              |             |              |   |              |              |              |   |              |              |              |   |              |              |              |   |             |              |              |   |             |              |              |   |             |              |              |   |             |              |              |   |             |              |              |   |             |             |              |
| H                                                                                                                                                                                                                           | 0.996778699                                                                                                                                                                                                                                                                                                                                                                                                                                                                                                                                                                                                                                                                                                                                                                                                                                                                                                                                                                                                                                                                                                                                                                                                                                                                                                                                                                                                                                                                                                                                                                                                                                                | 1.851048769  | -0.968475862 |              |              |   |              |              |              |   |              |              |              |   |              |              |              |   |              |              |              |   |              |              |              |   |              |             |              |   |              |              |              |   |              |             |             |   |              |             |              |   |              |              |              |   |              |              |              |   |              |              |              |   |             |              |              |   |             |              |              |   |             |              |              |   |             |              |              |   |             |              |              |   |             |             |              |
| H                                                                                                                                                                                                                           | 0.589246631                                                                                                                                                                                                                                                                                                                                                                                                                                                                                                                                                                                                                                                                                                                                                                                                                                                                                                                                                                                                                                                                                                                                                                                                                                                                                                                                                                                                                                                                                                                                                                                                                                                | 1.421756102  | 0.452219138  |              |              |   |              |              |              |   |              |              |              |   |              |              |              |   |              |              |              |   |              |              |              |   |              |             |              |   |              |              |              |   |              |             |             |   |              |             |              |   |              |              |              |   |              |              |              |   |              |              |              |   |             |              |              |   |             |              |              |   |             |              |              |   |             |              |              |   |             |              |              |   |             |             |              |
| H                                                                                                                                                                                                                           | 2.532611337                                                                                                                                                                                                                                                                                                                                                                                                                                                                                                                                                                                                                                                                                                                                                                                                                                                                                                                                                                                                                                                                                                                                                                                                                                                                                                                                                                                                                                                                                                                                                                                                                                                | 0.423780861  | -0.029124834 |              |              |   |              |              |              |   |              |              |              |   |              |              |              |   |              |              |              |   |              |              |              |   |              |             |              |   |              |              |              |   |              |             |             |   |              |             |              |   |              |              |              |   |              |              |              |   |              |              |              |   |             |              |              |   |             |              |              |   |             |              |              |   |             |              |              |   |             |              |              |   |             |             |              |
| H                                                                                                                                                                                                                           | 3.886586165                                                                                                                                                                                                                                                                                                                                                                                                                                                                                                                                                                                                                                                                                                                                                                                                                                                                                                                                                                                                                                                                                                                                                                                                                                                                                                                                                                                                                                                                                                                                                                                                                                                | -0.242561323 | 0.304353535  |              |              |   |              |              |              |   |              |              |              |   |              |              |              |   |              |              |              |   |              |              |              |   |              |             |              |   |              |              |              |   |              |             |             |   |              |             |              |   |              |              |              |   |              |              |              |   |              |              |              |   |             |              |              |   |             |              |              |   |             |              |              |   |             |              |              |   |             |              |              |   |             |             |              |
| O                                                                                                                                                                                                                           | 3.008853816                                                                                                                                                                                                                                                                                                                                                                                                                                                                                                                                                                                                                                                                                                                                                                                                                                                                                                                                                                                                                                                                                                                                                                                                                                                                                                                                                                                                                                                                                                                                                                                                                                                | -0.424359105 | -0.034099548 |              |              |   |              |              |              |   |              |              |              |   |              |              |              |   |              |              |              |   |              |              |              |   |              |             |              |   |              |              |              |   |              |             |             |   |              |             |              |   |              |              |              |   |              |              |              |   |              |              |              |   |             |              |              |   |             |              |              |   |             |              |              |   |             |              |              |   |             |              |              |   |             |             |              |
| <p style="text-align: center;">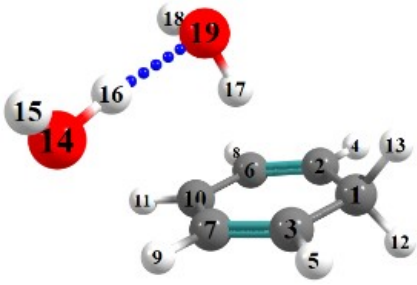</p> <p style="text-align: center;"><b>C2-BzH<sup>+</sup>-W<sub>2</sub></b><br/><b>[-26.48825887]</b></p>  | <table border="0"> <tbody> <tr><td>C</td><td>-0.673468711</td><td>-1.950659821</td><td>0.269034716</td></tr> <tr><td>C</td><td>-1.300020503</td><td>-1.612192818</td><td>-1.040743484</td></tr> <tr><td>C</td><td>-0.377551501</td><td>-0.748765240</td><td>1.101831892</td></tr> <tr><td>H</td><td>-1.523459726</td><td>-2.436141834</td><td>-1.701835086</td></tr> <tr><td>H</td><td>0.095934086</td><td>-0.920386037</td><td>2.056519662</td></tr> <tr><td>C</td><td>-1.596063182</td><td>-0.336017703</td><td>-1.392198542</td></tr> <tr><td>C</td><td>-0.697403682</td><td>0.509215057</td><td>0.700352227</td></tr> <tr><td>H</td><td>-2.060383914</td><td>-0.138843068</td><td>-2.348565843</td></tr> <tr><td>H</td><td>-0.458066174</td><td>1.350679725</td><td>1.333491605</td></tr> <tr><td>C</td><td>-1.312346249</td><td>0.745221352</td><td>-0.541210708</td></tr> <tr><td>H</td><td>-1.562158785</td><td>1.750331847</td><td>-0.837943761</td></tr> <tr><td>H</td><td>-1.334995591</td><td>-2.633616327</td><td>0.828000169</td></tr> <tr><td>H</td><td>0.247249624</td><td>-2.535553778</td><td>0.107098706</td></tr> <tr><td>O</td><td>2.189206956</td><td>2.292783131</td><td>1.343666935</td></tr> <tr><td>H</td><td>3.047559604</td><td>2.380849260</td><td>1.760321911</td></tr> <tr><td>H</td><td>2.288109572</td><td>1.609257777</td><td>0.662145959</td></tr> <tr><td>H</td><td>1.343019232</td><td>-0.077255674</td><td>-0.322958388</td></tr> <tr><td>H</td><td>1.921041200</td><td>0.761203951</td><td>-1.483086137</td></tr> <tr><td>O</td><td>2.156461743</td><td>0.310578011</td><td>-0.669171012</td></tr> </tbody> </table> | C            | -0.673468711 | -1.950659821 | 0.269034716  | C | -1.300020503 | -1.612192818 | -1.040743484 | C | -0.377551501 | -0.748765240 | 1.101831892  | H | -1.523459726 | -2.436141834 | -1.701835086 | H | 0.095934086  | -0.920386037 | 2.056519662  | C | -1.596063182 | -0.336017703 | -1.392198542 | C | -0.697403682 | 0.509215057 | 0.700352227  | H | -2.060383914 | -0.138843068 | -2.348565843 | H | -0.458066174 | 1.350679725 | 1.333491605 | C | -1.312346249 | 0.745221352 | -0.541210708 | H | -1.562158785 | 1.750331847  | -0.837943761 | H | -1.334995591 | -2.633616327 | 0.828000169  | H | 0.247249624  | -2.535553778 | 0.107098706  | O | 2.189206956 | 2.292783131  | 1.343666935  | H | 3.047559604 | 2.380849260  | 1.760321911  | H | 2.288109572 | 1.609257777  | 0.662145959  | H | 1.343019232 | -0.077255674 | -0.322958388 | H | 1.921041200 | 0.761203951  | -1.483086137 | O | 2.156461743 | 0.310578011 | -0.669171012 |
| C                                                                                                                                                                                                                           | -0.673468711                                                                                                                                                                                                                                                                                                                                                                                                                                                                                                                                                                                                                                                                                                                                                                                                                                                                                                                                                                                                                                                                                                                                                                                                                                                                                                                                                                                                                                                                                                                                                                                                                                               | -1.950659821 | 0.269034716  |              |              |   |              |              |              |   |              |              |              |   |              |              |              |   |              |              |              |   |              |              |              |   |              |             |              |   |              |              |              |   |              |             |             |   |              |             |              |   |              |              |              |   |              |              |              |   |              |              |              |   |             |              |              |   |             |              |              |   |             |              |              |   |             |              |              |   |             |              |              |   |             |             |              |
| C                                                                                                                                                                                                                           | -1.300020503                                                                                                                                                                                                                                                                                                                                                                                                                                                                                                                                                                                                                                                                                                                                                                                                                                                                                                                                                                                                                                                                                                                                                                                                                                                                                                                                                                                                                                                                                                                                                                                                                                               | -1.612192818 | -1.040743484 |              |              |   |              |              |              |   |              |              |              |   |              |              |              |   |              |              |              |   |              |              |              |   |              |             |              |   |              |              |              |   |              |             |             |   |              |             |              |   |              |              |              |   |              |              |              |   |              |              |              |   |             |              |              |   |             |              |              |   |             |              |              |   |             |              |              |   |             |              |              |   |             |             |              |
| C                                                                                                                                                                                                                           | -0.377551501                                                                                                                                                                                                                                                                                                                                                                                                                                                                                                                                                                                                                                                                                                                                                                                                                                                                                                                                                                                                                                                                                                                                                                                                                                                                                                                                                                                                                                                                                                                                                                                                                                               | -0.748765240 | 1.101831892  |              |              |   |              |              |              |   |              |              |              |   |              |              |              |   |              |              |              |   |              |              |              |   |              |             |              |   |              |              |              |   |              |             |             |   |              |             |              |   |              |              |              |   |              |              |              |   |              |              |              |   |             |              |              |   |             |              |              |   |             |              |              |   |             |              |              |   |             |              |              |   |             |             |              |
| H                                                                                                                                                                                                                           | -1.523459726                                                                                                                                                                                                                                                                                                                                                                                                                                                                                                                                                                                                                                                                                                                                                                                                                                                                                                                                                                                                                                                                                                                                                                                                                                                                                                                                                                                                                                                                                                                                                                                                                                               | -2.436141834 | -1.701835086 |              |              |   |              |              |              |   |              |              |              |   |              |              |              |   |              |              |              |   |              |              |              |   |              |             |              |   |              |              |              |   |              |             |             |   |              |             |              |   |              |              |              |   |              |              |              |   |              |              |              |   |             |              |              |   |             |              |              |   |             |              |              |   |             |              |              |   |             |              |              |   |             |             |              |
| H                                                                                                                                                                                                                           | 0.095934086                                                                                                                                                                                                                                                                                                                                                                                                                                                                                                                                                                                                                                                                                                                                                                                                                                                                                                                                                                                                                                                                                                                                                                                                                                                                                                                                                                                                                                                                                                                                                                                                                                                | -0.920386037 | 2.056519662  |              |              |   |              |              |              |   |              |              |              |   |              |              |              |   |              |              |              |   |              |              |              |   |              |             |              |   |              |              |              |   |              |             |             |   |              |             |              |   |              |              |              |   |              |              |              |   |              |              |              |   |             |              |              |   |             |              |              |   |             |              |              |   |             |              |              |   |             |              |              |   |             |             |              |
| C                                                                                                                                                                                                                           | -1.596063182                                                                                                                                                                                                                                                                                                                                                                                                                                                                                                                                                                                                                                                                                                                                                                                                                                                                                                                                                                                                                                                                                                                                                                                                                                                                                                                                                                                                                                                                                                                                                                                                                                               | -0.336017703 | -1.392198542 |              |              |   |              |              |              |   |              |              |              |   |              |              |              |   |              |              |              |   |              |              |              |   |              |             |              |   |              |              |              |   |              |             |             |   |              |             |              |   |              |              |              |   |              |              |              |   |              |              |              |   |             |              |              |   |             |              |              |   |             |              |              |   |             |              |              |   |             |              |              |   |             |             |              |
| C                                                                                                                                                                                                                           | -0.697403682                                                                                                                                                                                                                                                                                                                                                                                                                                                                                                                                                                                                                                                                                                                                                                                                                                                                                                                                                                                                                                                                                                                                                                                                                                                                                                                                                                                                                                                                                                                                                                                                                                               | 0.509215057  | 0.700352227  |              |              |   |              |              |              |   |              |              |              |   |              |              |              |   |              |              |              |   |              |              |              |   |              |             |              |   |              |              |              |   |              |             |             |   |              |             |              |   |              |              |              |   |              |              |              |   |              |              |              |   |             |              |              |   |             |              |              |   |             |              |              |   |             |              |              |   |             |              |              |   |             |             |              |
| H                                                                                                                                                                                                                           | -2.060383914                                                                                                                                                                                                                                                                                                                                                                                                                                                                                                                                                                                                                                                                                                                                                                                                                                                                                                                                                                                                                                                                                                                                                                                                                                                                                                                                                                                                                                                                                                                                                                                                                                               | -0.138843068 | -2.348565843 |              |              |   |              |              |              |   |              |              |              |   |              |              |              |   |              |              |              |   |              |              |              |   |              |             |              |   |              |              |              |   |              |             |             |   |              |             |              |   |              |              |              |   |              |              |              |   |              |              |              |   |             |              |              |   |             |              |              |   |             |              |              |   |             |              |              |   |             |              |              |   |             |             |              |
| H                                                                                                                                                                                                                           | -0.458066174                                                                                                                                                                                                                                                                                                                                                                                                                                                                                                                                                                                                                                                                                                                                                                                                                                                                                                                                                                                                                                                                                                                                                                                                                                                                                                                                                                                                                                                                                                                                                                                                                                               | 1.350679725  | 1.333491605  |              |              |   |              |              |              |   |              |              |              |   |              |              |              |   |              |              |              |   |              |              |              |   |              |             |              |   |              |              |              |   |              |             |             |   |              |             |              |   |              |              |              |   |              |              |              |   |              |              |              |   |             |              |              |   |             |              |              |   |             |              |              |   |             |              |              |   |             |              |              |   |             |             |              |
| C                                                                                                                                                                                                                           | -1.312346249                                                                                                                                                                                                                                                                                                                                                                                                                                                                                                                                                                                                                                                                                                                                                                                                                                                                                                                                                                                                                                                                                                                                                                                                                                                                                                                                                                                                                                                                                                                                                                                                                                               | 0.745221352  | -0.541210708 |              |              |   |              |              |              |   |              |              |              |   |              |              |              |   |              |              |              |   |              |              |              |   |              |             |              |   |              |              |              |   |              |             |             |   |              |             |              |   |              |              |              |   |              |              |              |   |              |              |              |   |             |              |              |   |             |              |              |   |             |              |              |   |             |              |              |   |             |              |              |   |             |             |              |
| H                                                                                                                                                                                                                           | -1.562158785                                                                                                                                                                                                                                                                                                                                                                                                                                                                                                                                                                                                                                                                                                                                                                                                                                                                                                                                                                                                                                                                                                                                                                                                                                                                                                                                                                                                                                                                                                                                                                                                                                               | 1.750331847  | -0.837943761 |              |              |   |              |              |              |   |              |              |              |   |              |              |              |   |              |              |              |   |              |              |              |   |              |             |              |   |              |              |              |   |              |             |             |   |              |             |              |   |              |              |              |   |              |              |              |   |              |              |              |   |             |              |              |   |             |              |              |   |             |              |              |   |             |              |              |   |             |              |              |   |             |             |              |
| H                                                                                                                                                                                                                           | -1.334995591                                                                                                                                                                                                                                                                                                                                                                                                                                                                                                                                                                                                                                                                                                                                                                                                                                                                                                                                                                                                                                                                                                                                                                                                                                                                                                                                                                                                                                                                                                                                                                                                                                               | -2.633616327 | 0.828000169  |              |              |   |              |              |              |   |              |              |              |   |              |              |              |   |              |              |              |   |              |              |              |   |              |             |              |   |              |              |              |   |              |             |             |   |              |             |              |   |              |              |              |   |              |              |              |   |              |              |              |   |             |              |              |   |             |              |              |   |             |              |              |   |             |              |              |   |             |              |              |   |             |             |              |
| H                                                                                                                                                                                                                           | 0.247249624                                                                                                                                                                                                                                                                                                                                                                                                                                                                                                                                                                                                                                                                                                                                                                                                                                                                                                                                                                                                                                                                                                                                                                                                                                                                                                                                                                                                                                                                                                                                                                                                                                                | -2.535553778 | 0.107098706  |              |              |   |              |              |              |   |              |              |              |   |              |              |              |   |              |              |              |   |              |              |              |   |              |             |              |   |              |              |              |   |              |             |             |   |              |             |              |   |              |              |              |   |              |              |              |   |              |              |              |   |             |              |              |   |             |              |              |   |             |              |              |   |             |              |              |   |             |              |              |   |             |             |              |
| O                                                                                                                                                                                                                           | 2.189206956                                                                                                                                                                                                                                                                                                                                                                                                                                                                                                                                                                                                                                                                                                                                                                                                                                                                                                                                                                                                                                                                                                                                                                                                                                                                                                                                                                                                                                                                                                                                                                                                                                                | 2.292783131  | 1.343666935  |              |              |   |              |              |              |   |              |              |              |   |              |              |              |   |              |              |              |   |              |              |              |   |              |             |              |   |              |              |              |   |              |             |             |   |              |             |              |   |              |              |              |   |              |              |              |   |              |              |              |   |             |              |              |   |             |              |              |   |             |              |              |   |             |              |              |   |             |              |              |   |             |             |              |
| H                                                                                                                                                                                                                           | 3.047559604                                                                                                                                                                                                                                                                                                                                                                                                                                                                                                                                                                                                                                                                                                                                                                                                                                                                                                                                                                                                                                                                                                                                                                                                                                                                                                                                                                                                                                                                                                                                                                                                                                                | 2.380849260  | 1.760321911  |              |              |   |              |              |              |   |              |              |              |   |              |              |              |   |              |              |              |   |              |              |              |   |              |             |              |   |              |              |              |   |              |             |             |   |              |             |              |   |              |              |              |   |              |              |              |   |              |              |              |   |             |              |              |   |             |              |              |   |             |              |              |   |             |              |              |   |             |              |              |   |             |             |              |
| H                                                                                                                                                                                                                           | 2.288109572                                                                                                                                                                                                                                                                                                                                                                                                                                                                                                                                                                                                                                                                                                                                                                                                                                                                                                                                                                                                                                                                                                                                                                                                                                                                                                                                                                                                                                                                                                                                                                                                                                                | 1.609257777  | 0.662145959  |              |              |   |              |              |              |   |              |              |              |   |              |              |              |   |              |              |              |   |              |              |              |   |              |             |              |   |              |              |              |   |              |             |             |   |              |             |              |   |              |              |              |   |              |              |              |   |              |              |              |   |             |              |              |   |             |              |              |   |             |              |              |   |             |              |              |   |             |              |              |   |             |             |              |
| H                                                                                                                                                                                                                           | 1.343019232                                                                                                                                                                                                                                                                                                                                                                                                                                                                                                                                                                                                                                                                                                                                                                                                                                                                                                                                                                                                                                                                                                                                                                                                                                                                                                                                                                                                                                                                                                                                                                                                                                                | -0.077255674 | -0.322958388 |              |              |   |              |              |              |   |              |              |              |   |              |              |              |   |              |              |              |   |              |              |              |   |              |             |              |   |              |              |              |   |              |             |             |   |              |             |              |   |              |              |              |   |              |              |              |   |              |              |              |   |             |              |              |   |             |              |              |   |             |              |              |   |             |              |              |   |             |              |              |   |             |             |              |
| H                                                                                                                                                                                                                           | 1.921041200                                                                                                                                                                                                                                                                                                                                                                                                                                                                                                                                                                                                                                                                                                                                                                                                                                                                                                                                                                                                                                                                                                                                                                                                                                                                                                                                                                                                                                                                                                                                                                                                                                                | 0.761203951  | -1.483086137 |              |              |   |              |              |              |   |              |              |              |   |              |              |              |   |              |              |              |   |              |              |              |   |              |             |              |   |              |              |              |   |              |             |             |   |              |             |              |   |              |              |              |   |              |              |              |   |              |              |              |   |             |              |              |   |             |              |              |   |             |              |              |   |             |              |              |   |             |              |              |   |             |             |              |
| O                                                                                                                                                                                                                           | 2.156461743                                                                                                                                                                                                                                                                                                                                                                                                                                                                                                                                                                                                                                                                                                                                                                                                                                                                                                                                                                                                                                                                                                                                                                                                                                                                                                                                                                                                                                                                                                                                                                                                                                                | 0.310578011  | -0.669171012 |              |              |   |              |              |              |   |              |              |              |   |              |              |              |   |              |              |              |   |              |              |              |   |              |             |              |   |              |              |              |   |              |             |             |   |              |             |              |   |              |              |              |   |              |              |              |   |              |              |              |   |             |              |              |   |             |              |              |   |             |              |              |   |             |              |              |   |             |              |              |   |             |             |              |
| <p style="text-align: center;"></p> <p style="text-align: center;"><b>C3-BzH<sup>+</sup>-W<sub>2</sub></b><br/><b>[-26.48818443]</b></p> | <table border="0"> <tbody> <tr><td>C</td><td>-1.697785273</td><td>-1.868441927</td><td>0.058000541</td></tr> <tr><td>C</td><td>-1.420211622</td><td>-1.107341778</td><td>-1.193143759</td></tr> <tr><td>C</td><td>-1.315709983</td><td>-1.124875690</td><td>1.291959907</td></tr> <tr><td>H</td><td>-1.691684771</td><td>-1.583811056</td><td>-2.123535319</td></tr> <tr><td>H</td><td>-1.507310192</td><td>-1.615155356</td><td>2.234645464</td></tr> <tr><td>C</td><td>-0.860590542</td><td>0.127457000</td><td>-1.178281035</td></tr> <tr><td>C</td><td>-0.757137169</td><td>0.109784371</td><td>1.248418120</td></tr> <tr><td>H</td><td>-0.677799177</td><td>0.646435690</td><td>-2.108986519</td></tr> <tr><td>H</td><td>-0.494457553</td><td>0.613561695</td><td>2.167743084</td></tr> <tr><td>C</td><td>-0.506972659</td><td>0.761711022</td><td>0.026878784</td></tr> <tr><td>H</td><td>-0.063114009</td><td>1.743377093</td><td>0.013572555</td></tr> <tr><td>H</td><td>-2.766506300</td><td>-2.134914551</td><td>0.100844843</td></tr> <tr><td>H</td><td>-1.173863756</td><td>-2.838913732</td><td>0.029925089</td></tr> <tr><td>O</td><td>2.401600079</td><td>-0.203666182</td><td>-0.181249603</td></tr> <tr><td>H</td><td>2.445400648</td><td>-0.424391143</td><td>-1.114057624</td></tr> <tr><td>H</td><td>1.466286335</td><td>-0.215072544</td><td>0.063446656</td></tr> <tr><td>H</td><td>2.555783457</td><td>1.644565281</td><td>-0.014213327</td></tr> <tr><td>H</td><td>3.175184951</td><td>2.954542521</td><td>0.515803153</td></tr> <tr><td>O</td><td>2.442024885</td><td>2.608377368</td><td>0.005485769</td></tr> </tbody> </table> | C            | -1.697785273 | -1.868441927 | 0.058000541  | C | -1.420211622 | -1.107341778 | -1.193143759 | C | -1.315709983 | -1.124875690 | 1.291959907  | H | -1.691684771 | -1.583811056 | -2.123535319 | H | -1.507310192 | -1.615155356 | 2.234645464  | C | -0.860590542 | 0.127457000  | -1.178281035 | C | -0.757137169 | 0.109784371 | 1.248418120  | H | -0.677799177 | 0.646435690  | -2.108986519 | H | -0.494457553 | 0.613561695 | 2.167743084 | C | -0.506972659 | 0.761711022 | 0.026878784  | H | -0.063114009 | 1.743377093  | 0.013572555  | H | -2.766506300 | -2.134914551 | 0.100844843  | H | -1.173863756 | -2.838913732 | 0.029925089  | O | 2.401600079 | -0.203666182 | -0.181249603 | H | 2.445400648 | -0.424391143 | -1.114057624 | H | 1.466286335 | -0.215072544 | 0.063446656  | H | 2.555783457 | 1.644565281  | -0.014213327 | H | 3.175184951 | 2.954542521  | 0.515803153  | O | 2.442024885 | 2.608377368 | 0.005485769  |
| C                                                                                                                                                                                                                           | -1.697785273                                                                                                                                                                                                                                                                                                                                                                                                                                                                                                                                                                                                                                                                                                                                                                                                                                                                                                                                                                                                                                                                                                                                                                                                                                                                                                                                                                                                                                                                                                                                                                                                                                               | -1.868441927 | 0.058000541  |              |              |   |              |              |              |   |              |              |              |   |              |              |              |   |              |              |              |   |              |              |              |   |              |             |              |   |              |              |              |   |              |             |             |   |              |             |              |   |              |              |              |   |              |              |              |   |              |              |              |   |             |              |              |   |             |              |              |   |             |              |              |   |             |              |              |   |             |              |              |   |             |             |              |
| C                                                                                                                                                                                                                           | -1.420211622                                                                                                                                                                                                                                                                                                                                                                                                                                                                                                                                                                                                                                                                                                                                                                                                                                                                                                                                                                                                                                                                                                                                                                                                                                                                                                                                                                                                                                                                                                                                                                                                                                               | -1.107341778 | -1.193143759 |              |              |   |              |              |              |   |              |              |              |   |              |              |              |   |              |              |              |   |              |              |              |   |              |             |              |   |              |              |              |   |              |             |             |   |              |             |              |   |              |              |              |   |              |              |              |   |              |              |              |   |             |              |              |   |             |              |              |   |             |              |              |   |             |              |              |   |             |              |              |   |             |             |              |
| C                                                                                                                                                                                                                           | -1.315709983                                                                                                                                                                                                                                                                                                                                                                                                                                                                                                                                                                                                                                                                                                                                                                                                                                                                                                                                                                                                                                                                                                                                                                                                                                                                                                                                                                                                                                                                                                                                                                                                                                               | -1.124875690 | 1.291959907  |              |              |   |              |              |              |   |              |              |              |   |              |              |              |   |              |              |              |   |              |              |              |   |              |             |              |   |              |              |              |   |              |             |             |   |              |             |              |   |              |              |              |   |              |              |              |   |              |              |              |   |             |              |              |   |             |              |              |   |             |              |              |   |             |              |              |   |             |              |              |   |             |             |              |
| H                                                                                                                                                                                                                           | -1.691684771                                                                                                                                                                                                                                                                                                                                                                                                                                                                                                                                                                                                                                                                                                                                                                                                                                                                                                                                                                                                                                                                                                                                                                                                                                                                                                                                                                                                                                                                                                                                                                                                                                               | -1.583811056 | -2.123535319 |              |              |   |              |              |              |   |              |              |              |   |              |              |              |   |              |              |              |   |              |              |              |   |              |             |              |   |              |              |              |   |              |             |             |   |              |             |              |   |              |              |              |   |              |              |              |   |              |              |              |   |             |              |              |   |             |              |              |   |             |              |              |   |             |              |              |   |             |              |              |   |             |             |              |
| H                                                                                                                                                                                                                           | -1.507310192                                                                                                                                                                                                                                                                                                                                                                                                                                                                                                                                                                                                                                                                                                                                                                                                                                                                                                                                                                                                                                                                                                                                                                                                                                                                                                                                                                                                                                                                                                                                                                                                                                               | -1.615155356 | 2.234645464  |              |              |   |              |              |              |   |              |              |              |   |              |              |              |   |              |              |              |   |              |              |              |   |              |             |              |   |              |              |              |   |              |             |             |   |              |             |              |   |              |              |              |   |              |              |              |   |              |              |              |   |             |              |              |   |             |              |              |   |             |              |              |   |             |              |              |   |             |              |              |   |             |             |              |
| C                                                                                                                                                                                                                           | -0.860590542                                                                                                                                                                                                                                                                                                                                                                                                                                                                                                                                                                                                                                                                                                                                                                                                                                                                                                                                                                                                                                                                                                                                                                                                                                                                                                                                                                                                                                                                                                                                                                                                                                               | 0.127457000  | -1.178281035 |              |              |   |              |              |              |   |              |              |              |   |              |              |              |   |              |              |              |   |              |              |              |   |              |             |              |   |              |              |              |   |              |             |             |   |              |             |              |   |              |              |              |   |              |              |              |   |              |              |              |   |             |              |              |   |             |              |              |   |             |              |              |   |             |              |              |   |             |              |              |   |             |             |              |
| C                                                                                                                                                                                                                           | -0.757137169                                                                                                                                                                                                                                                                                                                                                                                                                                                                                                                                                                                                                                                                                                                                                                                                                                                                                                                                                                                                                                                                                                                                                                                                                                                                                                                                                                                                                                                                                                                                                                                                                                               | 0.109784371  | 1.248418120  |              |              |   |              |              |              |   |              |              |              |   |              |              |              |   |              |              |              |   |              |              |              |   |              |             |              |   |              |              |              |   |              |             |             |   |              |             |              |   |              |              |              |   |              |              |              |   |              |              |              |   |             |              |              |   |             |              |              |   |             |              |              |   |             |              |              |   |             |              |              |   |             |             |              |
| H                                                                                                                                                                                                                           | -0.677799177                                                                                                                                                                                                                                                                                                                                                                                                                                                                                                                                                                                                                                                                                                                                                                                                                                                                                                                                                                                                                                                                                                                                                                                                                                                                                                                                                                                                                                                                                                                                                                                                                                               | 0.646435690  | -2.108986519 |              |              |   |              |              |              |   |              |              |              |   |              |              |              |   |              |              |              |   |              |              |              |   |              |             |              |   |              |              |              |   |              |             |             |   |              |             |              |   |              |              |              |   |              |              |              |   |              |              |              |   |             |              |              |   |             |              |              |   |             |              |              |   |             |              |              |   |             |              |              |   |             |             |              |
| H                                                                                                                                                                                                                           | -0.494457553                                                                                                                                                                                                                                                                                                                                                                                                                                                                                                                                                                                                                                                                                                                                                                                                                                                                                                                                                                                                                                                                                                                                                                                                                                                                                                                                                                                                                                                                                                                                                                                                                                               | 0.613561695  | 2.167743084  |              |              |   |              |              |              |   |              |              |              |   |              |              |              |   |              |              |              |   |              |              |              |   |              |             |              |   |              |              |              |   |              |             |             |   |              |             |              |   |              |              |              |   |              |              |              |   |              |              |              |   |             |              |              |   |             |              |              |   |             |              |              |   |             |              |              |   |             |              |              |   |             |             |              |
| C                                                                                                                                                                                                                           | -0.506972659                                                                                                                                                                                                                                                                                                                                                                                                                                                                                                                                                                                                                                                                                                                                                                                                                                                                                                                                                                                                                                                                                                                                                                                                                                                                                                                                                                                                                                                                                                                                                                                                                                               | 0.761711022  | 0.026878784  |              |              |   |              |              |              |   |              |              |              |   |              |              |              |   |              |              |              |   |              |              |              |   |              |             |              |   |              |              |              |   |              |             |             |   |              |             |              |   |              |              |              |   |              |              |              |   |              |              |              |   |             |              |              |   |             |              |              |   |             |              |              |   |             |              |              |   |             |              |              |   |             |             |              |
| H                                                                                                                                                                                                                           | -0.063114009                                                                                                                                                                                                                                                                                                                                                                                                                                                                                                                                                                                                                                                                                                                                                                                                                                                                                                                                                                                                                                                                                                                                                                                                                                                                                                                                                                                                                                                                                                                                                                                                                                               | 1.743377093  | 0.013572555  |              |              |   |              |              |              |   |              |              |              |   |              |              |              |   |              |              |              |   |              |              |              |   |              |             |              |   |              |              |              |   |              |             |             |   |              |             |              |   |              |              |              |   |              |              |              |   |              |              |              |   |             |              |              |   |             |              |              |   |             |              |              |   |             |              |              |   |             |              |              |   |             |             |              |
| H                                                                                                                                                                                                                           | -2.766506300                                                                                                                                                                                                                                                                                                                                                                                                                                                                                                                                                                                                                                                                                                                                                                                                                                                                                                                                                                                                                                                                                                                                                                                                                                                                                                                                                                                                                                                                                                                                                                                                                                               | -2.134914551 | 0.100844843  |              |              |   |              |              |              |   |              |              |              |   |              |              |              |   |              |              |              |   |              |              |              |   |              |             |              |   |              |              |              |   |              |             |             |   |              |             |              |   |              |              |              |   |              |              |              |   |              |              |              |   |             |              |              |   |             |              |              |   |             |              |              |   |             |              |              |   |             |              |              |   |             |             |              |
| H                                                                                                                                                                                                                           | -1.173863756                                                                                                                                                                                                                                                                                                                                                                                                                                                                                                                                                                                                                                                                                                                                                                                                                                                                                                                                                                                                                                                                                                                                                                                                                                                                                                                                                                                                                                                                                                                                                                                                                                               | -2.838913732 | 0.029925089  |              |              |   |              |              |              |   |              |              |              |   |              |              |              |   |              |              |              |   |              |              |              |   |              |             |              |   |              |              |              |   |              |             |             |   |              |             |              |   |              |              |              |   |              |              |              |   |              |              |              |   |             |              |              |   |             |              |              |   |             |              |              |   |             |              |              |   |             |              |              |   |             |             |              |
| O                                                                                                                                                                                                                           | 2.401600079                                                                                                                                                                                                                                                                                                                                                                                                                                                                                                                                                                                                                                                                                                                                                                                                                                                                                                                                                                                                                                                                                                                                                                                                                                                                                                                                                                                                                                                                                                                                                                                                                                                | -0.203666182 | -0.181249603 |              |              |   |              |              |              |   |              |              |              |   |              |              |              |   |              |              |              |   |              |              |              |   |              |             |              |   |              |              |              |   |              |             |             |   |              |             |              |   |              |              |              |   |              |              |              |   |              |              |              |   |             |              |              |   |             |              |              |   |             |              |              |   |             |              |              |   |             |              |              |   |             |             |              |
| H                                                                                                                                                                                                                           | 2.445400648                                                                                                                                                                                                                                                                                                                                                                                                                                                                                                                                                                                                                                                                                                                                                                                                                                                                                                                                                                                                                                                                                                                                                                                                                                                                                                                                                                                                                                                                                                                                                                                                                                                | -0.424391143 | -1.114057624 |              |              |   |              |              |              |   |              |              |              |   |              |              |              |   |              |              |              |   |              |              |              |   |              |             |              |   |              |              |              |   |              |             |             |   |              |             |              |   |              |              |              |   |              |              |              |   |              |              |              |   |             |              |              |   |             |              |              |   |             |              |              |   |             |              |              |   |             |              |              |   |             |             |              |
| H                                                                                                                                                                                                                           | 1.466286335                                                                                                                                                                                                                                                                                                                                                                                                                                                                                                                                                                                                                                                                                                                                                                                                                                                                                                                                                                                                                                                                                                                                                                                                                                                                                                                                                                                                                                                                                                                                                                                                                                                | -0.215072544 | 0.063446656  |              |              |   |              |              |              |   |              |              |              |   |              |              |              |   |              |              |              |   |              |              |              |   |              |             |              |   |              |              |              |   |              |             |             |   |              |             |              |   |              |              |              |   |              |              |              |   |              |              |              |   |             |              |              |   |             |              |              |   |             |              |              |   |             |              |              |   |             |              |              |   |             |             |              |
| H                                                                                                                                                                                                                           | 2.555783457                                                                                                                                                                                                                                                                                                                                                                                                                                                                                                                                                                                                                                                                                                                                                                                                                                                                                                                                                                                                                                                                                                                                                                                                                                                                                                                                                                                                                                                                                                                                                                                                                                                | 1.644565281  | -0.014213327 |              |              |   |              |              |              |   |              |              |              |   |              |              |              |   |              |              |              |   |              |              |              |   |              |             |              |   |              |              |              |   |              |             |             |   |              |             |              |   |              |              |              |   |              |              |              |   |              |              |              |   |             |              |              |   |             |              |              |   |             |              |              |   |             |              |              |   |             |              |              |   |             |             |              |
| H                                                                                                                                                                                                                           | 3.175184951                                                                                                                                                                                                                                                                                                                                                                                                                                                                                                                                                                                                                                                                                                                                                                                                                                                                                                                                                                                                                                                                                                                                                                                                                                                                                                                                                                                                                                                                                                                                                                                                                                                | 2.954542521  | 0.515803153  |              |              |   |              |              |              |   |              |              |              |   |              |              |              |   |              |              |              |   |              |              |              |   |              |             |              |   |              |              |              |   |              |             |             |   |              |             |              |   |              |              |              |   |              |              |              |   |              |              |              |   |             |              |              |   |             |              |              |   |             |              |              |   |             |              |              |   |             |              |              |   |             |             |              |
| O                                                                                                                                                                                                                           | 2.442024885                                                                                                                                                                                                                                                                                                                                                                                                                                                                                                                                                                                                                                                                                                                                                                                                                                                                                                                                                                                                                                                                                                                                                                                                                                                                                                                                                                                                                                                                                                                                                                                                                                                | 2.608377368  | 0.005485769  |              |              |   |              |              |              |   |              |              |              |   |              |              |              |   |              |              |              |   |              |              |              |   |              |             |              |   |              |              |              |   |              |             |             |   |              |             |              |   |              |              |              |   |              |              |              |   |              |              |              |   |             |              |              |   |             |              |              |   |             |              |              |   |             |              |              |   |             |              |              |   |             |             |              |



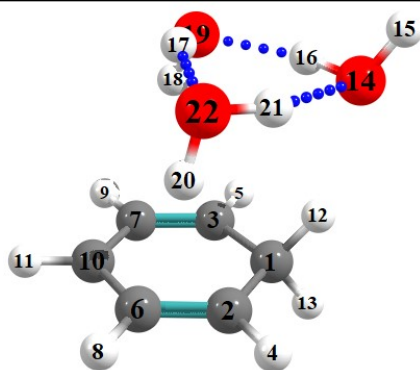

**C1-BzH<sup>+</sup>-W<sub>3</sub>**

**[-31.57726015]**

|   |              |              |              |
|---|--------------|--------------|--------------|
| C | -0.656234667 | 0.334526965  | 1.510711020  |
| C | -1.202836131 | 1.342937720  | 0.560817857  |
| C | -0.876506640 | -1.067677752 | 1.060567191  |
| H | -1.099414050 | 2.381444592  | 0.839112472  |
| H | -0.526168380 | -1.850261765 | 1.717149183  |
| C | -1.807596503 | 0.990164033  | -0.602837744 |
| C | -1.487900811 | -1.364292890 | -0.114697750 |
| H | -2.190090818 | 1.756089295  | -1.264070522 |
| H | -1.628370735 | -2.397862153 | -0.402647321 |
| C | -1.959115923 | -0.356508224 | -0.972121009 |
| H | -2.443876775 | -0.614175698 | -1.899012014 |
| H | 0.421729479  | 0.509708315  | 1.661085198  |
| H | -1.097161641 | 0.481754735  | 2.509071068  |
| O | 2.591194189  | 0.402033318  | 1.034651442  |
| H | 3.538996064  | 0.451452937  | 1.166743322  |
| H | 2.426947046  | -0.428338149 | 0.541530109  |
| H | 1.721987181  | -0.697154997 | -1.327040160 |
| H | 0.942319811  | -1.809439045 | -0.587927290 |
| O | 1.830767269  | -1.492846232 | -0.774116687 |
| H | 0.499519664  | 1.375418554  | -1.258919231 |
| H | 1.865785276  | 1.232954035  | -0.554149512 |
| O | 1.423180464  | 1.156868322  | -1.415270572 |

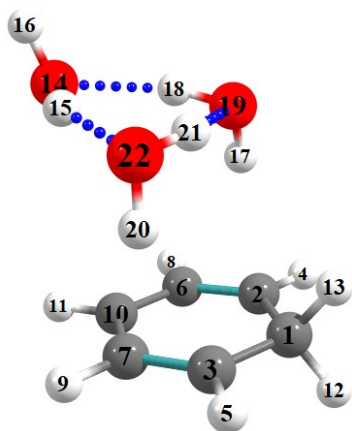

**C2-BzH<sup>+</sup>-W<sub>3</sub>**

**[-31.57522873]**

|   |              |              |              |
|---|--------------|--------------|--------------|
| C | -1.649339845 | 1.469137605  | 0.130125211  |
| C | -1.285268424 | 0.785558260  | 1.404141562  |
| C | -1.715296013 | 0.537682390  | -1.031669151 |
| H | -1.238774134 | 1.402101729  | 2.290182446  |
| H | -1.987938313 | 0.967224857  | -1.984729115 |
| C | -1.039933031 | -0.548885140 | 1.465871667  |
| C | -1.460715114 | -0.790667561 | -0.910287540 |
| H | -0.779298222 | -1.003480930 | 2.411510103  |
| H | -1.524963832 | -1.430870401 | -1.779543559 |
| C | -1.114128502 | -1.362489043 | 0.324578075  |
| H | -0.907260715 | -2.416561442 | 0.395782093  |
| H | -2.616510836 | 1.984427968  | 0.247957636  |
| H | -0.930997972 | 2.279474769  | -0.078174959 |
| O | 2.714741458  | -1.464147986 | -0.054463615 |
| H | 2.312203479  | -1.057150838 | -0.845599061 |
| H | 3.630091641  | -1.636425483 | -0.280047899 |
| H | 1.044011614  | 0.896895334  | 1.311386044  |
| H | 2.298915661  | 0.152479768  | 0.812288698  |
| O | 1.873511625  | 1.027514565  | 0.841267513  |
| H | 0.567952540  | 0.174535570  | -1.868434962 |
| H | 1.665032555  | 0.850350292  | -1.012561205 |
| O | 1.519633008  | 0.295551834  | -1.800925841 |

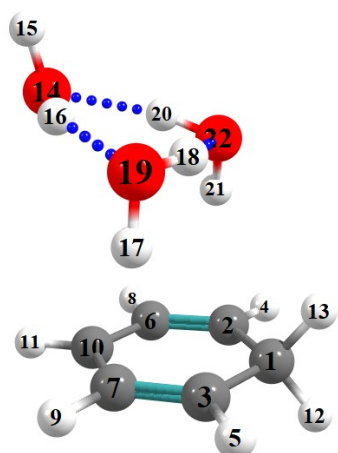

|   |              |              |              |
|---|--------------|--------------|--------------|
| C | -1.807804252 | -0.056053876 | -1.269597792 |
| C | -1.609636945 | 1.183178571  | -0.464810365 |
| C | -1.585274667 | -1.302344143 | -0.483507233 |
| H | -1.781336827 | 2.122945083  | -0.969447019 |
| H | -1.729593248 | -2.238174699 | -1.003192096 |
| C | -1.248038916 | 1.147159161  | 0.843896543  |
| C | -1.225971235 | -1.278160832 | 0.825643917  |
| H | -1.113650060 | 2.070812178  | 1.389481554  |
| H | -1.079446555 | -2.207585082 | 1.359209912  |
| C | -1.042158452 | -0.068192658 | 1.515022261  |
| H | -0.750039903 | -0.072839817 | 2.551346936  |
| H | -2.822707328 | -0.063352831 | -1.698846582 |

|                                                                                                                                                                                         |                                                                                                                                                                                                                                                                                                                                                                                                                                                                                                                                                                                                                                                                                                                                                                                                                                                                                                                                                                                                                                                                                                                                                                                                                                                                                                                                                                                                                                                                                                                                                                                                                                                                                                                                                                                                                                                                                                                                                                                                                                                                                                                                                                                                                                                                                                                                                                                                                                                                                                                                                                                                                                                                                                                                                                                                                                                                                                                                                                                                                                                                                                                                                                                                                                                                                                                                                                                                                                                 |              |              |              |              |   |             |              |             |   |             |              |              |   |              |              |              |   |              |              |              |   |             |              |              |   |             |              |              |   |              |              |              |   |              |             |              |   |             |             |              |   |              |             |              |   |              |             |              |   |              |              |              |   |              |              |              |   |              |              |              |   |              |              |              |   |              |              |              |   |              |              |              |   |             |              |             |   |             |              |              |   |              |             |              |   |              |              |             |   |             |              |             |   |             |             |             |   |             |             |             |   |             |              |             |   |             |             |             |   |             |             |             |   |             |             |              |   |             |             |              |   |             |             |             |   |             |             |             |   |              |             |              |   |              |             |              |   |              |             |              |   |              |             |              |   |              |              |              |   |              |              |             |   |              |             |             |   |              |              |             |
|-----------------------------------------------------------------------------------------------------------------------------------------------------------------------------------------|-------------------------------------------------------------------------------------------------------------------------------------------------------------------------------------------------------------------------------------------------------------------------------------------------------------------------------------------------------------------------------------------------------------------------------------------------------------------------------------------------------------------------------------------------------------------------------------------------------------------------------------------------------------------------------------------------------------------------------------------------------------------------------------------------------------------------------------------------------------------------------------------------------------------------------------------------------------------------------------------------------------------------------------------------------------------------------------------------------------------------------------------------------------------------------------------------------------------------------------------------------------------------------------------------------------------------------------------------------------------------------------------------------------------------------------------------------------------------------------------------------------------------------------------------------------------------------------------------------------------------------------------------------------------------------------------------------------------------------------------------------------------------------------------------------------------------------------------------------------------------------------------------------------------------------------------------------------------------------------------------------------------------------------------------------------------------------------------------------------------------------------------------------------------------------------------------------------------------------------------------------------------------------------------------------------------------------------------------------------------------------------------------------------------------------------------------------------------------------------------------------------------------------------------------------------------------------------------------------------------------------------------------------------------------------------------------------------------------------------------------------------------------------------------------------------------------------------------------------------------------------------------------------------------------------------------------------------------------------------------------------------------------------------------------------------------------------------------------------------------------------------------------------------------------------------------------------------------------------------------------------------------------------------------------------------------------------------------------------------------------------------------------------------------------------------------------|--------------|--------------|--------------|--------------|---|-------------|--------------|-------------|---|-------------|--------------|--------------|---|--------------|--------------|--------------|---|--------------|--------------|--------------|---|-------------|--------------|--------------|---|-------------|--------------|--------------|---|--------------|--------------|--------------|---|--------------|-------------|--------------|---|-------------|-------------|--------------|---|--------------|-------------|--------------|---|--------------|-------------|--------------|---|--------------|--------------|--------------|---|--------------|--------------|--------------|---|--------------|--------------|--------------|---|--------------|--------------|--------------|---|--------------|--------------|--------------|---|--------------|--------------|--------------|---|-------------|--------------|-------------|---|-------------|--------------|--------------|---|--------------|-------------|--------------|---|--------------|--------------|-------------|---|-------------|--------------|-------------|---|-------------|-------------|-------------|---|-------------|-------------|-------------|---|-------------|--------------|-------------|---|-------------|-------------|-------------|---|-------------|-------------|-------------|---|-------------|-------------|--------------|---|-------------|-------------|--------------|---|-------------|-------------|-------------|---|-------------|-------------|-------------|---|--------------|-------------|--------------|---|--------------|-------------|--------------|---|--------------|-------------|--------------|---|--------------|-------------|--------------|---|--------------|--------------|--------------|---|--------------|--------------|-------------|---|--------------|-------------|-------------|---|--------------|--------------|-------------|
| <p style="text-align: center;"><b>C3-BzH<sup>+</sup>-W<sub>3</sub></b><br/><b>[-31.57521202]</b></p>                                                                                    | <table border="1"> <tbody> <tr><td>H</td><td>-1.139322616</td><td>-0.042185773</td><td>-2.146577288</td></tr> <tr><td>O</td><td>3.010763380</td><td>0.454184845</td><td>1.045522007</td></tr> <tr><td>H</td><td>3.965974244</td><td>0.392895079</td><td>0.996672895</td></tr> <tr><td>H</td><td>2.666782501</td><td>-0.386529175</td><td>0.687910376</td></tr> <tr><td>H</td><td>0.891848919</td><td>-1.691806582</td><td>-0.259448559</td></tr> <tr><td>H</td><td>1.663134353</td><td>-0.610921906</td><td>-1.052471656</td></tr> <tr><td>O</td><td>1.774724795</td><td>-1.430551398</td><td>-0.536146789</td></tr> <tr><td>H</td><td>2.114002606</td><td>1.275497385</td><td>-0.384851951</td></tr> <tr><td>H</td><td>0.659102173</td><td>1.550142154</td><td>-0.820323713</td></tr> <tr><td>O</td><td>1.512458597</td><td>1.251214772</td><td>-1.149973907</td></tr> </tbody> </table>                                                                                                                                                                                                                                                                                                                                                                                                                                                                                                                                                                                                                                                                                                                                                                                                                                                                                                                                                                                                                                                                                                                                                                                                                                                                                                                                                                                                                                                                                                                                                                                                                                                                                                                                                                                                                                                                                                                                                                                                                                                                                                                                                                                                                                                                                                                                                                                                                                                                                                                                                       | H            | -1.139322616 | -0.042185773 | -2.146577288 | O | 3.010763380 | 0.454184845  | 1.045522007 | H | 3.965974244 | 0.392895079  | 0.996672895  | H | 2.666782501  | -0.386529175 | 0.687910376  | H | 0.891848919  | -1.691806582 | -0.259448559 | H | 1.663134353 | -0.610921906 | -1.052471656 | O | 1.774724795 | -1.430551398 | -0.536146789 | H | 2.114002606  | 1.275497385  | -0.384851951 | H | 0.659102173  | 1.550142154 | -0.820323713 | O | 1.512458597 | 1.251214772 | -1.149973907 |   |              |             |              |   |              |             |              |   |              |              |              |   |              |              |              |   |              |              |              |   |              |              |              |   |              |              |              |   |              |              |              |   |             |              |             |   |             |              |              |   |              |             |              |   |              |              |             |   |             |              |             |   |             |             |             |   |             |             |             |   |             |              |             |   |             |             |             |   |             |             |             |   |             |             |              |   |             |             |              |   |             |             |             |   |             |             |             |   |              |             |              |   |              |             |              |   |              |             |              |   |              |             |              |   |              |              |              |   |              |              |             |   |              |             |             |   |              |              |             |
| H                                                                                                                                                                                       | -1.139322616                                                                                                                                                                                                                                                                                                                                                                                                                                                                                                                                                                                                                                                                                                                                                                                                                                                                                                                                                                                                                                                                                                                                                                                                                                                                                                                                                                                                                                                                                                                                                                                                                                                                                                                                                                                                                                                                                                                                                                                                                                                                                                                                                                                                                                                                                                                                                                                                                                                                                                                                                                                                                                                                                                                                                                                                                                                                                                                                                                                                                                                                                                                                                                                                                                                                                                                                                                                                                                    | -0.042185773 | -2.146577288 |              |              |   |             |              |             |   |             |              |              |   |              |              |              |   |              |              |              |   |             |              |              |   |             |              |              |   |              |              |              |   |              |             |              |   |             |             |              |   |              |             |              |   |              |             |              |   |              |              |              |   |              |              |              |   |              |              |              |   |              |              |              |   |              |              |              |   |              |              |              |   |             |              |             |   |             |              |              |   |              |             |              |   |              |              |             |   |             |              |             |   |             |             |             |   |             |             |             |   |             |              |             |   |             |             |             |   |             |             |             |   |             |             |              |   |             |             |              |   |             |             |             |   |             |             |             |   |              |             |              |   |              |             |              |   |              |             |              |   |              |             |              |   |              |              |              |   |              |              |             |   |              |             |             |   |              |              |             |
| O                                                                                                                                                                                       | 3.010763380                                                                                                                                                                                                                                                                                                                                                                                                                                                                                                                                                                                                                                                                                                                                                                                                                                                                                                                                                                                                                                                                                                                                                                                                                                                                                                                                                                                                                                                                                                                                                                                                                                                                                                                                                                                                                                                                                                                                                                                                                                                                                                                                                                                                                                                                                                                                                                                                                                                                                                                                                                                                                                                                                                                                                                                                                                                                                                                                                                                                                                                                                                                                                                                                                                                                                                                                                                                                                                     | 0.454184845  | 1.045522007  |              |              |   |             |              |             |   |             |              |              |   |              |              |              |   |              |              |              |   |             |              |              |   |             |              |              |   |              |              |              |   |              |             |              |   |             |             |              |   |              |             |              |   |              |             |              |   |              |              |              |   |              |              |              |   |              |              |              |   |              |              |              |   |              |              |              |   |              |              |              |   |             |              |             |   |             |              |              |   |              |             |              |   |              |              |             |   |             |              |             |   |             |             |             |   |             |             |             |   |             |              |             |   |             |             |             |   |             |             |             |   |             |             |              |   |             |             |              |   |             |             |             |   |             |             |             |   |              |             |              |   |              |             |              |   |              |             |              |   |              |             |              |   |              |              |              |   |              |              |             |   |              |             |             |   |              |              |             |
| H                                                                                                                                                                                       | 3.965974244                                                                                                                                                                                                                                                                                                                                                                                                                                                                                                                                                                                                                                                                                                                                                                                                                                                                                                                                                                                                                                                                                                                                                                                                                                                                                                                                                                                                                                                                                                                                                                                                                                                                                                                                                                                                                                                                                                                                                                                                                                                                                                                                                                                                                                                                                                                                                                                                                                                                                                                                                                                                                                                                                                                                                                                                                                                                                                                                                                                                                                                                                                                                                                                                                                                                                                                                                                                                                                     | 0.392895079  | 0.996672895  |              |              |   |             |              |             |   |             |              |              |   |              |              |              |   |              |              |              |   |             |              |              |   |             |              |              |   |              |              |              |   |              |             |              |   |             |             |              |   |              |             |              |   |              |             |              |   |              |              |              |   |              |              |              |   |              |              |              |   |              |              |              |   |              |              |              |   |              |              |              |   |             |              |             |   |             |              |              |   |              |             |              |   |              |              |             |   |             |              |             |   |             |             |             |   |             |             |             |   |             |              |             |   |             |             |             |   |             |             |             |   |             |             |              |   |             |             |              |   |             |             |             |   |             |             |             |   |              |             |              |   |              |             |              |   |              |             |              |   |              |             |              |   |              |              |              |   |              |              |             |   |              |             |             |   |              |              |             |
| H                                                                                                                                                                                       | 2.666782501                                                                                                                                                                                                                                                                                                                                                                                                                                                                                                                                                                                                                                                                                                                                                                                                                                                                                                                                                                                                                                                                                                                                                                                                                                                                                                                                                                                                                                                                                                                                                                                                                                                                                                                                                                                                                                                                                                                                                                                                                                                                                                                                                                                                                                                                                                                                                                                                                                                                                                                                                                                                                                                                                                                                                                                                                                                                                                                                                                                                                                                                                                                                                                                                                                                                                                                                                                                                                                     | -0.386529175 | 0.687910376  |              |              |   |             |              |             |   |             |              |              |   |              |              |              |   |              |              |              |   |             |              |              |   |             |              |              |   |              |              |              |   |              |             |              |   |             |             |              |   |              |             |              |   |              |             |              |   |              |              |              |   |              |              |              |   |              |              |              |   |              |              |              |   |              |              |              |   |              |              |              |   |             |              |             |   |             |              |              |   |              |             |              |   |              |              |             |   |             |              |             |   |             |             |             |   |             |             |             |   |             |              |             |   |             |             |             |   |             |             |             |   |             |             |              |   |             |             |              |   |             |             |             |   |             |             |             |   |              |             |              |   |              |             |              |   |              |             |              |   |              |             |              |   |              |              |              |   |              |              |             |   |              |             |             |   |              |              |             |
| H                                                                                                                                                                                       | 0.891848919                                                                                                                                                                                                                                                                                                                                                                                                                                                                                                                                                                                                                                                                                                                                                                                                                                                                                                                                                                                                                                                                                                                                                                                                                                                                                                                                                                                                                                                                                                                                                                                                                                                                                                                                                                                                                                                                                                                                                                                                                                                                                                                                                                                                                                                                                                                                                                                                                                                                                                                                                                                                                                                                                                                                                                                                                                                                                                                                                                                                                                                                                                                                                                                                                                                                                                                                                                                                                                     | -1.691806582 | -0.259448559 |              |              |   |             |              |             |   |             |              |              |   |              |              |              |   |              |              |              |   |             |              |              |   |             |              |              |   |              |              |              |   |              |             |              |   |             |             |              |   |              |             |              |   |              |             |              |   |              |              |              |   |              |              |              |   |              |              |              |   |              |              |              |   |              |              |              |   |              |              |              |   |             |              |             |   |             |              |              |   |              |             |              |   |              |              |             |   |             |              |             |   |             |             |             |   |             |             |             |   |             |              |             |   |             |             |             |   |             |             |             |   |             |             |              |   |             |             |              |   |             |             |             |   |             |             |             |   |              |             |              |   |              |             |              |   |              |             |              |   |              |             |              |   |              |              |              |   |              |              |             |   |              |             |             |   |              |              |             |
| H                                                                                                                                                                                       | 1.663134353                                                                                                                                                                                                                                                                                                                                                                                                                                                                                                                                                                                                                                                                                                                                                                                                                                                                                                                                                                                                                                                                                                                                                                                                                                                                                                                                                                                                                                                                                                                                                                                                                                                                                                                                                                                                                                                                                                                                                                                                                                                                                                                                                                                                                                                                                                                                                                                                                                                                                                                                                                                                                                                                                                                                                                                                                                                                                                                                                                                                                                                                                                                                                                                                                                                                                                                                                                                                                                     | -0.610921906 | -1.052471656 |              |              |   |             |              |             |   |             |              |              |   |              |              |              |   |              |              |              |   |             |              |              |   |             |              |              |   |              |              |              |   |              |             |              |   |             |             |              |   |              |             |              |   |              |             |              |   |              |              |              |   |              |              |              |   |              |              |              |   |              |              |              |   |              |              |              |   |              |              |              |   |             |              |             |   |             |              |              |   |              |             |              |   |              |              |             |   |             |              |             |   |             |             |             |   |             |             |             |   |             |              |             |   |             |             |             |   |             |             |             |   |             |             |              |   |             |             |              |   |             |             |             |   |             |             |             |   |              |             |              |   |              |             |              |   |              |             |              |   |              |             |              |   |              |              |              |   |              |              |             |   |              |             |             |   |              |              |             |
| O                                                                                                                                                                                       | 1.774724795                                                                                                                                                                                                                                                                                                                                                                                                                                                                                                                                                                                                                                                                                                                                                                                                                                                                                                                                                                                                                                                                                                                                                                                                                                                                                                                                                                                                                                                                                                                                                                                                                                                                                                                                                                                                                                                                                                                                                                                                                                                                                                                                                                                                                                                                                                                                                                                                                                                                                                                                                                                                                                                                                                                                                                                                                                                                                                                                                                                                                                                                                                                                                                                                                                                                                                                                                                                                                                     | -1.430551398 | -0.536146789 |              |              |   |             |              |             |   |             |              |              |   |              |              |              |   |              |              |              |   |             |              |              |   |             |              |              |   |              |              |              |   |              |             |              |   |             |             |              |   |              |             |              |   |              |             |              |   |              |              |              |   |              |              |              |   |              |              |              |   |              |              |              |   |              |              |              |   |              |              |              |   |             |              |             |   |             |              |              |   |              |             |              |   |              |              |             |   |             |              |             |   |             |             |             |   |             |             |             |   |             |              |             |   |             |             |             |   |             |             |             |   |             |             |              |   |             |             |              |   |             |             |             |   |             |             |             |   |              |             |              |   |              |             |              |   |              |             |              |   |              |             |              |   |              |              |              |   |              |              |             |   |              |             |             |   |              |              |             |
| H                                                                                                                                                                                       | 2.114002606                                                                                                                                                                                                                                                                                                                                                                                                                                                                                                                                                                                                                                                                                                                                                                                                                                                                                                                                                                                                                                                                                                                                                                                                                                                                                                                                                                                                                                                                                                                                                                                                                                                                                                                                                                                                                                                                                                                                                                                                                                                                                                                                                                                                                                                                                                                                                                                                                                                                                                                                                                                                                                                                                                                                                                                                                                                                                                                                                                                                                                                                                                                                                                                                                                                                                                                                                                                                                                     | 1.275497385  | -0.384851951 |              |              |   |             |              |             |   |             |              |              |   |              |              |              |   |              |              |              |   |             |              |              |   |             |              |              |   |              |              |              |   |              |             |              |   |             |             |              |   |              |             |              |   |              |             |              |   |              |              |              |   |              |              |              |   |              |              |              |   |              |              |              |   |              |              |              |   |              |              |              |   |             |              |             |   |             |              |              |   |              |             |              |   |              |              |             |   |             |              |             |   |             |             |             |   |             |             |             |   |             |              |             |   |             |             |             |   |             |             |             |   |             |             |              |   |             |             |              |   |             |             |             |   |             |             |             |   |              |             |              |   |              |             |              |   |              |             |              |   |              |             |              |   |              |              |              |   |              |              |             |   |              |             |             |   |              |              |             |
| H                                                                                                                                                                                       | 0.659102173                                                                                                                                                                                                                                                                                                                                                                                                                                                                                                                                                                                                                                                                                                                                                                                                                                                                                                                                                                                                                                                                                                                                                                                                                                                                                                                                                                                                                                                                                                                                                                                                                                                                                                                                                                                                                                                                                                                                                                                                                                                                                                                                                                                                                                                                                                                                                                                                                                                                                                                                                                                                                                                                                                                                                                                                                                                                                                                                                                                                                                                                                                                                                                                                                                                                                                                                                                                                                                     | 1.550142154  | -0.820323713 |              |              |   |             |              |             |   |             |              |              |   |              |              |              |   |              |              |              |   |             |              |              |   |             |              |              |   |              |              |              |   |              |             |              |   |             |             |              |   |              |             |              |   |              |             |              |   |              |              |              |   |              |              |              |   |              |              |              |   |              |              |              |   |              |              |              |   |              |              |              |   |             |              |             |   |             |              |              |   |              |             |              |   |              |              |             |   |             |              |             |   |             |             |             |   |             |             |             |   |             |              |             |   |             |             |             |   |             |             |             |   |             |             |              |   |             |             |              |   |             |             |             |   |             |             |             |   |              |             |              |   |              |             |              |   |              |             |              |   |              |             |              |   |              |              |              |   |              |              |             |   |              |             |             |   |              |              |             |
| O                                                                                                                                                                                       | 1.512458597                                                                                                                                                                                                                                                                                                                                                                                                                                                                                                                                                                                                                                                                                                                                                                                                                                                                                                                                                                                                                                                                                                                                                                                                                                                                                                                                                                                                                                                                                                                                                                                                                                                                                                                                                                                                                                                                                                                                                                                                                                                                                                                                                                                                                                                                                                                                                                                                                                                                                                                                                                                                                                                                                                                                                                                                                                                                                                                                                                                                                                                                                                                                                                                                                                                                                                                                                                                                                                     | 1.251214772  | -1.149973907 |              |              |   |             |              |             |   |             |              |              |   |              |              |              |   |              |              |              |   |             |              |              |   |             |              |              |   |              |              |              |   |              |             |              |   |             |             |              |   |              |             |              |   |              |             |              |   |              |              |              |   |              |              |              |   |              |              |              |   |              |              |              |   |              |              |              |   |              |              |              |   |             |              |             |   |             |              |              |   |              |             |              |   |              |              |             |   |             |              |             |   |             |             |             |   |             |             |             |   |             |              |             |   |             |             |             |   |             |             |             |   |             |             |              |   |             |             |              |   |             |             |             |   |             |             |             |   |              |             |              |   |              |             |              |   |              |             |              |   |              |             |              |   |              |              |              |   |              |              |             |   |              |             |             |   |              |              |             |
| 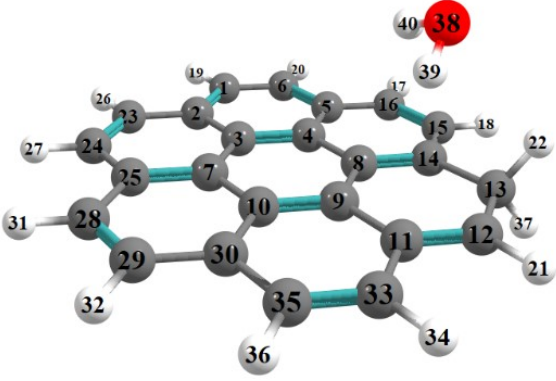 <p style="text-align: center;"><b>C1-CorH<sup>+</sup>-W<sub>1</sub></b><br/><b>[-63.14564738]</b></p> | <table border="1"> <tbody> <tr><td>C</td><td>2.294580955</td><td>-3.053210572</td><td>0.009542461</td></tr> <tr><td>C</td><td>2.457022256</td><td>-1.645636765</td><td>0.032491474</td></tr> <tr><td>C</td><td>1.311569469</td><td>-0.823582536</td><td>-0.062820658</td></tr> <tr><td>C</td><td>0.025802354</td><td>-1.407921342</td><td>-0.178320519</td></tr> <tr><td>C</td><td>-0.105997780</td><td>-2.815763572</td><td>-0.197217359</td></tr> <tr><td>C</td><td>1.063557215</td><td>-3.616783846</td><td>-0.100895235</td></tr> <tr><td>C</td><td>1.450253887</td><td>0.584254216</td><td>-0.042879231</td></tr> <tr><td>C</td><td>-1.126466291</td><td>-0.584243811</td><td>-0.270816293</td></tr> <tr><td>C</td><td>-0.977309381</td><td>0.833348298</td><td>-0.252997654</td></tr> <tr><td>C</td><td>0.298551514</td><td>1.410712747</td><td>-0.141204719</td></tr> <tr><td>C</td><td>-2.139776247</td><td>1.671976649</td><td>-0.356764239</td></tr> <tr><td>C</td><td>-3.385240537</td><td>1.119734028</td><td>-0.459312188</td></tr> <tr><td>C</td><td>-3.634041901</td><td>-0.342475149</td><td>-0.444124386</td></tr> <tr><td>C</td><td>-2.392950432</td><td>-1.179824592</td><td>-0.375277590</td></tr> <tr><td>C</td><td>-2.499401056</td><td>-2.566965765</td><td>-0.394686261</td></tr> <tr><td>C</td><td>-1.386670606</td><td>-3.374114229</td><td>-0.309233685</td></tr> <tr><td>H</td><td>-1.492074911</td><td>-4.449050239</td><td>-0.326116870</td></tr> <tr><td>H</td><td>-3.480219549</td><td>-3.014206994</td><td>-0.476155792</td></tr> <tr><td>H</td><td>3.177606426</td><td>-3.672500523</td><td>0.082151996</td></tr> <tr><td>H</td><td>0.948813539</td><td>-4.691301871</td><td>-0.117580732</td></tr> <tr><td>H</td><td>-4.251653933</td><td>1.759860857</td><td>-0.541397297</td></tr> <tr><td>H</td><td>-4.272767056</td><td>-0.584559745</td><td>0.419017146</td></tr> <tr><td>C</td><td>3.725487235</td><td>-1.038854946</td><td>0.147327630</td></tr> <tr><td>C</td><td>3.859205102</td><td>0.318518497</td><td>0.166632276</td></tr> <tr><td>C</td><td>2.731433367</td><td>1.165515548</td><td>0.071920704</td></tr> <tr><td>H</td><td>4.596578550</td><td>-1.674868940</td><td>0.220064836</td></tr> <tr><td>H</td><td>4.836870508</td><td>0.770939807</td><td>0.254691290</td></tr> <tr><td>C</td><td>2.846143756</td><td>2.573730251</td><td>0.087446329</td></tr> <tr><td>C</td><td>1.739427164</td><td>3.371195342</td><td>-0.009604151</td></tr> <tr><td>C</td><td>0.451251363</td><td>2.821454678</td><td>-0.126228349</td></tr> <tr><td>H</td><td>3.830020330</td><td>3.011628013</td><td>0.176382538</td></tr> <tr><td>H</td><td>1.841937887</td><td>4.447394966</td><td>0.001496488</td></tr> <tr><td>C</td><td>-1.943548309</td><td>3.091925678</td><td>-0.346118416</td></tr> <tr><td>H</td><td>-2.819005714</td><td>3.719853144</td><td>-0.428308871</td></tr> <tr><td>C</td><td>-0.708953700</td><td>3.635010549</td><td>-0.233444935</td></tr> <tr><td>H</td><td>-0.580979940</td><td>4.708391557</td><td>-0.224232895</td></tr> <tr><td>H</td><td>-4.222844443</td><td>-0.626251696</td><td>-1.327557226</td></tr> <tr><td>O</td><td>-2.577612215</td><td>-0.089407473</td><td>2.695579567</td></tr> <tr><td>H</td><td>-2.386960743</td><td>0.697952830</td><td>2.179840603</td></tr> <tr><td>H</td><td>-1.926726963</td><td>-0.747714485</td><td>2.442278304</td></tr> </tbody> </table> | C            | 2.294580955  | -3.053210572 | 0.009542461  | C | 2.457022256 | -1.645636765 | 0.032491474 | C | 1.311569469 | -0.823582536 | -0.062820658 | C | 0.025802354  | -1.407921342 | -0.178320519 | C | -0.105997780 | -2.815763572 | -0.197217359 | C | 1.063557215 | -3.616783846 | -0.100895235 | C | 1.450253887 | 0.584254216  | -0.042879231 | C | -1.126466291 | -0.584243811 | -0.270816293 | C | -0.977309381 | 0.833348298 | -0.252997654 | C | 0.298551514 | 1.410712747 | -0.141204719 | C | -2.139776247 | 1.671976649 | -0.356764239 | C | -3.385240537 | 1.119734028 | -0.459312188 | C | -3.634041901 | -0.342475149 | -0.444124386 | C | -2.392950432 | -1.179824592 | -0.375277590 | C | -2.499401056 | -2.566965765 | -0.394686261 | C | -1.386670606 | -3.374114229 | -0.309233685 | H | -1.492074911 | -4.449050239 | -0.326116870 | H | -3.480219549 | -3.014206994 | -0.476155792 | H | 3.177606426 | -3.672500523 | 0.082151996 | H | 0.948813539 | -4.691301871 | -0.117580732 | H | -4.251653933 | 1.759860857 | -0.541397297 | H | -4.272767056 | -0.584559745 | 0.419017146 | C | 3.725487235 | -1.038854946 | 0.147327630 | C | 3.859205102 | 0.318518497 | 0.166632276 | C | 2.731433367 | 1.165515548 | 0.071920704 | H | 4.596578550 | -1.674868940 | 0.220064836 | H | 4.836870508 | 0.770939807 | 0.254691290 | C | 2.846143756 | 2.573730251 | 0.087446329 | C | 1.739427164 | 3.371195342 | -0.009604151 | C | 0.451251363 | 2.821454678 | -0.126228349 | H | 3.830020330 | 3.011628013 | 0.176382538 | H | 1.841937887 | 4.447394966 | 0.001496488 | C | -1.943548309 | 3.091925678 | -0.346118416 | H | -2.819005714 | 3.719853144 | -0.428308871 | C | -0.708953700 | 3.635010549 | -0.233444935 | H | -0.580979940 | 4.708391557 | -0.224232895 | H | -4.222844443 | -0.626251696 | -1.327557226 | O | -2.577612215 | -0.089407473 | 2.695579567 | H | -2.386960743 | 0.697952830 | 2.179840603 | H | -1.926726963 | -0.747714485 | 2.442278304 |
| C                                                                                                                                                                                       | 2.294580955                                                                                                                                                                                                                                                                                                                                                                                                                                                                                                                                                                                                                                                                                                                                                                                                                                                                                                                                                                                                                                                                                                                                                                                                                                                                                                                                                                                                                                                                                                                                                                                                                                                                                                                                                                                                                                                                                                                                                                                                                                                                                                                                                                                                                                                                                                                                                                                                                                                                                                                                                                                                                                                                                                                                                                                                                                                                                                                                                                                                                                                                                                                                                                                                                                                                                                                                                                                                                                     | -3.053210572 | 0.009542461  |              |              |   |             |              |             |   |             |              |              |   |              |              |              |   |              |              |              |   |             |              |              |   |             |              |              |   |              |              |              |   |              |             |              |   |             |             |              |   |              |             |              |   |              |             |              |   |              |              |              |   |              |              |              |   |              |              |              |   |              |              |              |   |              |              |              |   |              |              |              |   |             |              |             |   |             |              |              |   |              |             |              |   |              |              |             |   |             |              |             |   |             |             |             |   |             |             |             |   |             |              |             |   |             |             |             |   |             |             |             |   |             |             |              |   |             |             |              |   |             |             |             |   |             |             |             |   |              |             |              |   |              |             |              |   |              |             |              |   |              |             |              |   |              |              |              |   |              |              |             |   |              |             |             |   |              |              |             |
| C                                                                                                                                                                                       | 2.457022256                                                                                                                                                                                                                                                                                                                                                                                                                                                                                                                                                                                                                                                                                                                                                                                                                                                                                                                                                                                                                                                                                                                                                                                                                                                                                                                                                                                                                                                                                                                                                                                                                                                                                                                                                                                                                                                                                                                                                                                                                                                                                                                                                                                                                                                                                                                                                                                                                                                                                                                                                                                                                                                                                                                                                                                                                                                                                                                                                                                                                                                                                                                                                                                                                                                                                                                                                                                                                                     | -1.645636765 | 0.032491474  |              |              |   |             |              |             |   |             |              |              |   |              |              |              |   |              |              |              |   |             |              |              |   |             |              |              |   |              |              |              |   |              |             |              |   |             |             |              |   |              |             |              |   |              |             |              |   |              |              |              |   |              |              |              |   |              |              |              |   |              |              |              |   |              |              |              |   |              |              |              |   |             |              |             |   |             |              |              |   |              |             |              |   |              |              |             |   |             |              |             |   |             |             |             |   |             |             |             |   |             |              |             |   |             |             |             |   |             |             |             |   |             |             |              |   |             |             |              |   |             |             |             |   |             |             |             |   |              |             |              |   |              |             |              |   |              |             |              |   |              |             |              |   |              |              |              |   |              |              |             |   |              |             |             |   |              |              |             |
| C                                                                                                                                                                                       | 1.311569469                                                                                                                                                                                                                                                                                                                                                                                                                                                                                                                                                                                                                                                                                                                                                                                                                                                                                                                                                                                                                                                                                                                                                                                                                                                                                                                                                                                                                                                                                                                                                                                                                                                                                                                                                                                                                                                                                                                                                                                                                                                                                                                                                                                                                                                                                                                                                                                                                                                                                                                                                                                                                                                                                                                                                                                                                                                                                                                                                                                                                                                                                                                                                                                                                                                                                                                                                                                                                                     | -0.823582536 | -0.062820658 |              |              |   |             |              |             |   |             |              |              |   |              |              |              |   |              |              |              |   |             |              |              |   |             |              |              |   |              |              |              |   |              |             |              |   |             |             |              |   |              |             |              |   |              |             |              |   |              |              |              |   |              |              |              |   |              |              |              |   |              |              |              |   |              |              |              |   |              |              |              |   |             |              |             |   |             |              |              |   |              |             |              |   |              |              |             |   |             |              |             |   |             |             |             |   |             |             |             |   |             |              |             |   |             |             |             |   |             |             |             |   |             |             |              |   |             |             |              |   |             |             |             |   |             |             |             |   |              |             |              |   |              |             |              |   |              |             |              |   |              |             |              |   |              |              |              |   |              |              |             |   |              |             |             |   |              |              |             |
| C                                                                                                                                                                                       | 0.025802354                                                                                                                                                                                                                                                                                                                                                                                                                                                                                                                                                                                                                                                                                                                                                                                                                                                                                                                                                                                                                                                                                                                                                                                                                                                                                                                                                                                                                                                                                                                                                                                                                                                                                                                                                                                                                                                                                                                                                                                                                                                                                                                                                                                                                                                                                                                                                                                                                                                                                                                                                                                                                                                                                                                                                                                                                                                                                                                                                                                                                                                                                                                                                                                                                                                                                                                                                                                                                                     | -1.407921342 | -0.178320519 |              |              |   |             |              |             |   |             |              |              |   |              |              |              |   |              |              |              |   |             |              |              |   |             |              |              |   |              |              |              |   |              |             |              |   |             |             |              |   |              |             |              |   |              |             |              |   |              |              |              |   |              |              |              |   |              |              |              |   |              |              |              |   |              |              |              |   |              |              |              |   |             |              |             |   |             |              |              |   |              |             |              |   |              |              |             |   |             |              |             |   |             |             |             |   |             |             |             |   |             |              |             |   |             |             |             |   |             |             |             |   |             |             |              |   |             |             |              |   |             |             |             |   |             |             |             |   |              |             |              |   |              |             |              |   |              |             |              |   |              |             |              |   |              |              |              |   |              |              |             |   |              |             |             |   |              |              |             |
| C                                                                                                                                                                                       | -0.105997780                                                                                                                                                                                                                                                                                                                                                                                                                                                                                                                                                                                                                                                                                                                                                                                                                                                                                                                                                                                                                                                                                                                                                                                                                                                                                                                                                                                                                                                                                                                                                                                                                                                                                                                                                                                                                                                                                                                                                                                                                                                                                                                                                                                                                                                                                                                                                                                                                                                                                                                                                                                                                                                                                                                                                                                                                                                                                                                                                                                                                                                                                                                                                                                                                                                                                                                                                                                                                                    | -2.815763572 | -0.197217359 |              |              |   |             |              |             |   |             |              |              |   |              |              |              |   |              |              |              |   |             |              |              |   |             |              |              |   |              |              |              |   |              |             |              |   |             |             |              |   |              |             |              |   |              |             |              |   |              |              |              |   |              |              |              |   |              |              |              |   |              |              |              |   |              |              |              |   |              |              |              |   |             |              |             |   |             |              |              |   |              |             |              |   |              |              |             |   |             |              |             |   |             |             |             |   |             |             |             |   |             |              |             |   |             |             |             |   |             |             |             |   |             |             |              |   |             |             |              |   |             |             |             |   |             |             |             |   |              |             |              |   |              |             |              |   |              |             |              |   |              |             |              |   |              |              |              |   |              |              |             |   |              |             |             |   |              |              |             |
| C                                                                                                                                                                                       | 1.063557215                                                                                                                                                                                                                                                                                                                                                                                                                                                                                                                                                                                                                                                                                                                                                                                                                                                                                                                                                                                                                                                                                                                                                                                                                                                                                                                                                                                                                                                                                                                                                                                                                                                                                                                                                                                                                                                                                                                                                                                                                                                                                                                                                                                                                                                                                                                                                                                                                                                                                                                                                                                                                                                                                                                                                                                                                                                                                                                                                                                                                                                                                                                                                                                                                                                                                                                                                                                                                                     | -3.616783846 | -0.100895235 |              |              |   |             |              |             |   |             |              |              |   |              |              |              |   |              |              |              |   |             |              |              |   |             |              |              |   |              |              |              |   |              |             |              |   |             |             |              |   |              |             |              |   |              |             |              |   |              |              |              |   |              |              |              |   |              |              |              |   |              |              |              |   |              |              |              |   |              |              |              |   |             |              |             |   |             |              |              |   |              |             |              |   |              |              |             |   |             |              |             |   |             |             |             |   |             |             |             |   |             |              |             |   |             |             |             |   |             |             |             |   |             |             |              |   |             |             |              |   |             |             |             |   |             |             |             |   |              |             |              |   |              |             |              |   |              |             |              |   |              |             |              |   |              |              |              |   |              |              |             |   |              |             |             |   |              |              |             |
| C                                                                                                                                                                                       | 1.450253887                                                                                                                                                                                                                                                                                                                                                                                                                                                                                                                                                                                                                                                                                                                                                                                                                                                                                                                                                                                                                                                                                                                                                                                                                                                                                                                                                                                                                                                                                                                                                                                                                                                                                                                                                                                                                                                                                                                                                                                                                                                                                                                                                                                                                                                                                                                                                                                                                                                                                                                                                                                                                                                                                                                                                                                                                                                                                                                                                                                                                                                                                                                                                                                                                                                                                                                                                                                                                                     | 0.584254216  | -0.042879231 |              |              |   |             |              |             |   |             |              |              |   |              |              |              |   |              |              |              |   |             |              |              |   |             |              |              |   |              |              |              |   |              |             |              |   |             |             |              |   |              |             |              |   |              |             |              |   |              |              |              |   |              |              |              |   |              |              |              |   |              |              |              |   |              |              |              |   |              |              |              |   |             |              |             |   |             |              |              |   |              |             |              |   |              |              |             |   |             |              |             |   |             |             |             |   |             |             |             |   |             |              |             |   |             |             |             |   |             |             |             |   |             |             |              |   |             |             |              |   |             |             |             |   |             |             |             |   |              |             |              |   |              |             |              |   |              |             |              |   |              |             |              |   |              |              |              |   |              |              |             |   |              |             |             |   |              |              |             |
| C                                                                                                                                                                                       | -1.126466291                                                                                                                                                                                                                                                                                                                                                                                                                                                                                                                                                                                                                                                                                                                                                                                                                                                                                                                                                                                                                                                                                                                                                                                                                                                                                                                                                                                                                                                                                                                                                                                                                                                                                                                                                                                                                                                                                                                                                                                                                                                                                                                                                                                                                                                                                                                                                                                                                                                                                                                                                                                                                                                                                                                                                                                                                                                                                                                                                                                                                                                                                                                                                                                                                                                                                                                                                                                                                                    | -0.584243811 | -0.270816293 |              |              |   |             |              |             |   |             |              |              |   |              |              |              |   |              |              |              |   |             |              |              |   |             |              |              |   |              |              |              |   |              |             |              |   |             |             |              |   |              |             |              |   |              |             |              |   |              |              |              |   |              |              |              |   |              |              |              |   |              |              |              |   |              |              |              |   |              |              |              |   |             |              |             |   |             |              |              |   |              |             |              |   |              |              |             |   |             |              |             |   |             |             |             |   |             |             |             |   |             |              |             |   |             |             |             |   |             |             |             |   |             |             |              |   |             |             |              |   |             |             |             |   |             |             |             |   |              |             |              |   |              |             |              |   |              |             |              |   |              |             |              |   |              |              |              |   |              |              |             |   |              |             |             |   |              |              |             |
| C                                                                                                                                                                                       | -0.977309381                                                                                                                                                                                                                                                                                                                                                                                                                                                                                                                                                                                                                                                                                                                                                                                                                                                                                                                                                                                                                                                                                                                                                                                                                                                                                                                                                                                                                                                                                                                                                                                                                                                                                                                                                                                                                                                                                                                                                                                                                                                                                                                                                                                                                                                                                                                                                                                                                                                                                                                                                                                                                                                                                                                                                                                                                                                                                                                                                                                                                                                                                                                                                                                                                                                                                                                                                                                                                                    | 0.833348298  | -0.252997654 |              |              |   |             |              |             |   |             |              |              |   |              |              |              |   |              |              |              |   |             |              |              |   |             |              |              |   |              |              |              |   |              |             |              |   |             |             |              |   |              |             |              |   |              |             |              |   |              |              |              |   |              |              |              |   |              |              |              |   |              |              |              |   |              |              |              |   |              |              |              |   |             |              |             |   |             |              |              |   |              |             |              |   |              |              |             |   |             |              |             |   |             |             |             |   |             |             |             |   |             |              |             |   |             |             |             |   |             |             |             |   |             |             |              |   |             |             |              |   |             |             |             |   |             |             |             |   |              |             |              |   |              |             |              |   |              |             |              |   |              |             |              |   |              |              |              |   |              |              |             |   |              |             |             |   |              |              |             |
| C                                                                                                                                                                                       | 0.298551514                                                                                                                                                                                                                                                                                                                                                                                                                                                                                                                                                                                                                                                                                                                                                                                                                                                                                                                                                                                                                                                                                                                                                                                                                                                                                                                                                                                                                                                                                                                                                                                                                                                                                                                                                                                                                                                                                                                                                                                                                                                                                                                                                                                                                                                                                                                                                                                                                                                                                                                                                                                                                                                                                                                                                                                                                                                                                                                                                                                                                                                                                                                                                                                                                                                                                                                                                                                                                                     | 1.410712747  | -0.141204719 |              |              |   |             |              |             |   |             |              |              |   |              |              |              |   |              |              |              |   |             |              |              |   |             |              |              |   |              |              |              |   |              |             |              |   |             |             |              |   |              |             |              |   |              |             |              |   |              |              |              |   |              |              |              |   |              |              |              |   |              |              |              |   |              |              |              |   |              |              |              |   |             |              |             |   |             |              |              |   |              |             |              |   |              |              |             |   |             |              |             |   |             |             |             |   |             |             |             |   |             |              |             |   |             |             |             |   |             |             |             |   |             |             |              |   |             |             |              |   |             |             |             |   |             |             |             |   |              |             |              |   |              |             |              |   |              |             |              |   |              |             |              |   |              |              |              |   |              |              |             |   |              |             |             |   |              |              |             |
| C                                                                                                                                                                                       | -2.139776247                                                                                                                                                                                                                                                                                                                                                                                                                                                                                                                                                                                                                                                                                                                                                                                                                                                                                                                                                                                                                                                                                                                                                                                                                                                                                                                                                                                                                                                                                                                                                                                                                                                                                                                                                                                                                                                                                                                                                                                                                                                                                                                                                                                                                                                                                                                                                                                                                                                                                                                                                                                                                                                                                                                                                                                                                                                                                                                                                                                                                                                                                                                                                                                                                                                                                                                                                                                                                                    | 1.671976649  | -0.356764239 |              |              |   |             |              |             |   |             |              |              |   |              |              |              |   |              |              |              |   |             |              |              |   |             |              |              |   |              |              |              |   |              |             |              |   |             |             |              |   |              |             |              |   |              |             |              |   |              |              |              |   |              |              |              |   |              |              |              |   |              |              |              |   |              |              |              |   |              |              |              |   |             |              |             |   |             |              |              |   |              |             |              |   |              |              |             |   |             |              |             |   |             |             |             |   |             |             |             |   |             |              |             |   |             |             |             |   |             |             |             |   |             |             |              |   |             |             |              |   |             |             |             |   |             |             |             |   |              |             |              |   |              |             |              |   |              |             |              |   |              |             |              |   |              |              |              |   |              |              |             |   |              |             |             |   |              |              |             |
| C                                                                                                                                                                                       | -3.385240537                                                                                                                                                                                                                                                                                                                                                                                                                                                                                                                                                                                                                                                                                                                                                                                                                                                                                                                                                                                                                                                                                                                                                                                                                                                                                                                                                                                                                                                                                                                                                                                                                                                                                                                                                                                                                                                                                                                                                                                                                                                                                                                                                                                                                                                                                                                                                                                                                                                                                                                                                                                                                                                                                                                                                                                                                                                                                                                                                                                                                                                                                                                                                                                                                                                                                                                                                                                                                                    | 1.119734028  | -0.459312188 |              |              |   |             |              |             |   |             |              |              |   |              |              |              |   |              |              |              |   |             |              |              |   |             |              |              |   |              |              |              |   |              |             |              |   |             |             |              |   |              |             |              |   |              |             |              |   |              |              |              |   |              |              |              |   |              |              |              |   |              |              |              |   |              |              |              |   |              |              |              |   |             |              |             |   |             |              |              |   |              |             |              |   |              |              |             |   |             |              |             |   |             |             |             |   |             |             |             |   |             |              |             |   |             |             |             |   |             |             |             |   |             |             |              |   |             |             |              |   |             |             |             |   |             |             |             |   |              |             |              |   |              |             |              |   |              |             |              |   |              |             |              |   |              |              |              |   |              |              |             |   |              |             |             |   |              |              |             |
| C                                                                                                                                                                                       | -3.634041901                                                                                                                                                                                                                                                                                                                                                                                                                                                                                                                                                                                                                                                                                                                                                                                                                                                                                                                                                                                                                                                                                                                                                                                                                                                                                                                                                                                                                                                                                                                                                                                                                                                                                                                                                                                                                                                                                                                                                                                                                                                                                                                                                                                                                                                                                                                                                                                                                                                                                                                                                                                                                                                                                                                                                                                                                                                                                                                                                                                                                                                                                                                                                                                                                                                                                                                                                                                                                                    | -0.342475149 | -0.444124386 |              |              |   |             |              |             |   |             |              |              |   |              |              |              |   |              |              |              |   |             |              |              |   |             |              |              |   |              |              |              |   |              |             |              |   |             |             |              |   |              |             |              |   |              |             |              |   |              |              |              |   |              |              |              |   |              |              |              |   |              |              |              |   |              |              |              |   |              |              |              |   |             |              |             |   |             |              |              |   |              |             |              |   |              |              |             |   |             |              |             |   |             |             |             |   |             |             |             |   |             |              |             |   |             |             |             |   |             |             |             |   |             |             |              |   |             |             |              |   |             |             |             |   |             |             |             |   |              |             |              |   |              |             |              |   |              |             |              |   |              |             |              |   |              |              |              |   |              |              |             |   |              |             |             |   |              |              |             |
| C                                                                                                                                                                                       | -2.392950432                                                                                                                                                                                                                                                                                                                                                                                                                                                                                                                                                                                                                                                                                                                                                                                                                                                                                                                                                                                                                                                                                                                                                                                                                                                                                                                                                                                                                                                                                                                                                                                                                                                                                                                                                                                                                                                                                                                                                                                                                                                                                                                                                                                                                                                                                                                                                                                                                                                                                                                                                                                                                                                                                                                                                                                                                                                                                                                                                                                                                                                                                                                                                                                                                                                                                                                                                                                                                                    | -1.179824592 | -0.375277590 |              |              |   |             |              |             |   |             |              |              |   |              |              |              |   |              |              |              |   |             |              |              |   |             |              |              |   |              |              |              |   |              |             |              |   |             |             |              |   |              |             |              |   |              |             |              |   |              |              |              |   |              |              |              |   |              |              |              |   |              |              |              |   |              |              |              |   |              |              |              |   |             |              |             |   |             |              |              |   |              |             |              |   |              |              |             |   |             |              |             |   |             |             |             |   |             |             |             |   |             |              |             |   |             |             |             |   |             |             |             |   |             |             |              |   |             |             |              |   |             |             |             |   |             |             |             |   |              |             |              |   |              |             |              |   |              |             |              |   |              |             |              |   |              |              |              |   |              |              |             |   |              |             |             |   |              |              |             |
| C                                                                                                                                                                                       | -2.499401056                                                                                                                                                                                                                                                                                                                                                                                                                                                                                                                                                                                                                                                                                                                                                                                                                                                                                                                                                                                                                                                                                                                                                                                                                                                                                                                                                                                                                                                                                                                                                                                                                                                                                                                                                                                                                                                                                                                                                                                                                                                                                                                                                                                                                                                                                                                                                                                                                                                                                                                                                                                                                                                                                                                                                                                                                                                                                                                                                                                                                                                                                                                                                                                                                                                                                                                                                                                                                                    | -2.566965765 | -0.394686261 |              |              |   |             |              |             |   |             |              |              |   |              |              |              |   |              |              |              |   |             |              |              |   |             |              |              |   |              |              |              |   |              |             |              |   |             |             |              |   |              |             |              |   |              |             |              |   |              |              |              |   |              |              |              |   |              |              |              |   |              |              |              |   |              |              |              |   |              |              |              |   |             |              |             |   |             |              |              |   |              |             |              |   |              |              |             |   |             |              |             |   |             |             |             |   |             |             |             |   |             |              |             |   |             |             |             |   |             |             |             |   |             |             |              |   |             |             |              |   |             |             |             |   |             |             |             |   |              |             |              |   |              |             |              |   |              |             |              |   |              |             |              |   |              |              |              |   |              |              |             |   |              |             |             |   |              |              |             |
| C                                                                                                                                                                                       | -1.386670606                                                                                                                                                                                                                                                                                                                                                                                                                                                                                                                                                                                                                                                                                                                                                                                                                                                                                                                                                                                                                                                                                                                                                                                                                                                                                                                                                                                                                                                                                                                                                                                                                                                                                                                                                                                                                                                                                                                                                                                                                                                                                                                                                                                                                                                                                                                                                                                                                                                                                                                                                                                                                                                                                                                                                                                                                                                                                                                                                                                                                                                                                                                                                                                                                                                                                                                                                                                                                                    | -3.374114229 | -0.309233685 |              |              |   |             |              |             |   |             |              |              |   |              |              |              |   |              |              |              |   |             |              |              |   |             |              |              |   |              |              |              |   |              |             |              |   |             |             |              |   |              |             |              |   |              |             |              |   |              |              |              |   |              |              |              |   |              |              |              |   |              |              |              |   |              |              |              |   |              |              |              |   |             |              |             |   |             |              |              |   |              |             |              |   |              |              |             |   |             |              |             |   |             |             |             |   |             |             |             |   |             |              |             |   |             |             |             |   |             |             |             |   |             |             |              |   |             |             |              |   |             |             |             |   |             |             |             |   |              |             |              |   |              |             |              |   |              |             |              |   |              |             |              |   |              |              |              |   |              |              |             |   |              |             |             |   |              |              |             |
| H                                                                                                                                                                                       | -1.492074911                                                                                                                                                                                                                                                                                                                                                                                                                                                                                                                                                                                                                                                                                                                                                                                                                                                                                                                                                                                                                                                                                                                                                                                                                                                                                                                                                                                                                                                                                                                                                                                                                                                                                                                                                                                                                                                                                                                                                                                                                                                                                                                                                                                                                                                                                                                                                                                                                                                                                                                                                                                                                                                                                                                                                                                                                                                                                                                                                                                                                                                                                                                                                                                                                                                                                                                                                                                                                                    | -4.449050239 | -0.326116870 |              |              |   |             |              |             |   |             |              |              |   |              |              |              |   |              |              |              |   |             |              |              |   |             |              |              |   |              |              |              |   |              |             |              |   |             |             |              |   |              |             |              |   |              |             |              |   |              |              |              |   |              |              |              |   |              |              |              |   |              |              |              |   |              |              |              |   |              |              |              |   |             |              |             |   |             |              |              |   |              |             |              |   |              |              |             |   |             |              |             |   |             |             |             |   |             |             |             |   |             |              |             |   |             |             |             |   |             |             |             |   |             |             |              |   |             |             |              |   |             |             |             |   |             |             |             |   |              |             |              |   |              |             |              |   |              |             |              |   |              |             |              |   |              |              |              |   |              |              |             |   |              |             |             |   |              |              |             |
| H                                                                                                                                                                                       | -3.480219549                                                                                                                                                                                                                                                                                                                                                                                                                                                                                                                                                                                                                                                                                                                                                                                                                                                                                                                                                                                                                                                                                                                                                                                                                                                                                                                                                                                                                                                                                                                                                                                                                                                                                                                                                                                                                                                                                                                                                                                                                                                                                                                                                                                                                                                                                                                                                                                                                                                                                                                                                                                                                                                                                                                                                                                                                                                                                                                                                                                                                                                                                                                                                                                                                                                                                                                                                                                                                                    | -3.014206994 | -0.476155792 |              |              |   |             |              |             |   |             |              |              |   |              |              |              |   |              |              |              |   |             |              |              |   |             |              |              |   |              |              |              |   |              |             |              |   |             |             |              |   |              |             |              |   |              |             |              |   |              |              |              |   |              |              |              |   |              |              |              |   |              |              |              |   |              |              |              |   |              |              |              |   |             |              |             |   |             |              |              |   |              |             |              |   |              |              |             |   |             |              |             |   |             |             |             |   |             |             |             |   |             |              |             |   |             |             |             |   |             |             |             |   |             |             |              |   |             |             |              |   |             |             |             |   |             |             |             |   |              |             |              |   |              |             |              |   |              |             |              |   |              |             |              |   |              |              |              |   |              |              |             |   |              |             |             |   |              |              |             |
| H                                                                                                                                                                                       | 3.177606426                                                                                                                                                                                                                                                                                                                                                                                                                                                                                                                                                                                                                                                                                                                                                                                                                                                                                                                                                                                                                                                                                                                                                                                                                                                                                                                                                                                                                                                                                                                                                                                                                                                                                                                                                                                                                                                                                                                                                                                                                                                                                                                                                                                                                                                                                                                                                                                                                                                                                                                                                                                                                                                                                                                                                                                                                                                                                                                                                                                                                                                                                                                                                                                                                                                                                                                                                                                                                                     | -3.672500523 | 0.082151996  |              |              |   |             |              |             |   |             |              |              |   |              |              |              |   |              |              |              |   |             |              |              |   |             |              |              |   |              |              |              |   |              |             |              |   |             |             |              |   |              |             |              |   |              |             |              |   |              |              |              |   |              |              |              |   |              |              |              |   |              |              |              |   |              |              |              |   |              |              |              |   |             |              |             |   |             |              |              |   |              |             |              |   |              |              |             |   |             |              |             |   |             |             |             |   |             |             |             |   |             |              |             |   |             |             |             |   |             |             |             |   |             |             |              |   |             |             |              |   |             |             |             |   |             |             |             |   |              |             |              |   |              |             |              |   |              |             |              |   |              |             |              |   |              |              |              |   |              |              |             |   |              |             |             |   |              |              |             |
| H                                                                                                                                                                                       | 0.948813539                                                                                                                                                                                                                                                                                                                                                                                                                                                                                                                                                                                                                                                                                                                                                                                                                                                                                                                                                                                                                                                                                                                                                                                                                                                                                                                                                                                                                                                                                                                                                                                                                                                                                                                                                                                                                                                                                                                                                                                                                                                                                                                                                                                                                                                                                                                                                                                                                                                                                                                                                                                                                                                                                                                                                                                                                                                                                                                                                                                                                                                                                                                                                                                                                                                                                                                                                                                                                                     | -4.691301871 | -0.117580732 |              |              |   |             |              |             |   |             |              |              |   |              |              |              |   |              |              |              |   |             |              |              |   |             |              |              |   |              |              |              |   |              |             |              |   |             |             |              |   |              |             |              |   |              |             |              |   |              |              |              |   |              |              |              |   |              |              |              |   |              |              |              |   |              |              |              |   |              |              |              |   |             |              |             |   |             |              |              |   |              |             |              |   |              |              |             |   |             |              |             |   |             |             |             |   |             |             |             |   |             |              |             |   |             |             |             |   |             |             |             |   |             |             |              |   |             |             |              |   |             |             |             |   |             |             |             |   |              |             |              |   |              |             |              |   |              |             |              |   |              |             |              |   |              |              |              |   |              |              |             |   |              |             |             |   |              |              |             |
| H                                                                                                                                                                                       | -4.251653933                                                                                                                                                                                                                                                                                                                                                                                                                                                                                                                                                                                                                                                                                                                                                                                                                                                                                                                                                                                                                                                                                                                                                                                                                                                                                                                                                                                                                                                                                                                                                                                                                                                                                                                                                                                                                                                                                                                                                                                                                                                                                                                                                                                                                                                                                                                                                                                                                                                                                                                                                                                                                                                                                                                                                                                                                                                                                                                                                                                                                                                                                                                                                                                                                                                                                                                                                                                                                                    | 1.759860857  | -0.541397297 |              |              |   |             |              |             |   |             |              |              |   |              |              |              |   |              |              |              |   |             |              |              |   |             |              |              |   |              |              |              |   |              |             |              |   |             |             |              |   |              |             |              |   |              |             |              |   |              |              |              |   |              |              |              |   |              |              |              |   |              |              |              |   |              |              |              |   |              |              |              |   |             |              |             |   |             |              |              |   |              |             |              |   |              |              |             |   |             |              |             |   |             |             |             |   |             |             |             |   |             |              |             |   |             |             |             |   |             |             |             |   |             |             |              |   |             |             |              |   |             |             |             |   |             |             |             |   |              |             |              |   |              |             |              |   |              |             |              |   |              |             |              |   |              |              |              |   |              |              |             |   |              |             |             |   |              |              |             |
| H                                                                                                                                                                                       | -4.272767056                                                                                                                                                                                                                                                                                                                                                                                                                                                                                                                                                                                                                                                                                                                                                                                                                                                                                                                                                                                                                                                                                                                                                                                                                                                                                                                                                                                                                                                                                                                                                                                                                                                                                                                                                                                                                                                                                                                                                                                                                                                                                                                                                                                                                                                                                                                                                                                                                                                                                                                                                                                                                                                                                                                                                                                                                                                                                                                                                                                                                                                                                                                                                                                                                                                                                                                                                                                                                                    | -0.584559745 | 0.419017146  |              |              |   |             |              |             |   |             |              |              |   |              |              |              |   |              |              |              |   |             |              |              |   |             |              |              |   |              |              |              |   |              |             |              |   |             |             |              |   |              |             |              |   |              |             |              |   |              |              |              |   |              |              |              |   |              |              |              |   |              |              |              |   |              |              |              |   |              |              |              |   |             |              |             |   |             |              |              |   |              |             |              |   |              |              |             |   |             |              |             |   |             |             |             |   |             |             |             |   |             |              |             |   |             |             |             |   |             |             |             |   |             |             |              |   |             |             |              |   |             |             |             |   |             |             |             |   |              |             |              |   |              |             |              |   |              |             |              |   |              |             |              |   |              |              |              |   |              |              |             |   |              |             |             |   |              |              |             |
| C                                                                                                                                                                                       | 3.725487235                                                                                                                                                                                                                                                                                                                                                                                                                                                                                                                                                                                                                                                                                                                                                                                                                                                                                                                                                                                                                                                                                                                                                                                                                                                                                                                                                                                                                                                                                                                                                                                                                                                                                                                                                                                                                                                                                                                                                                                                                                                                                                                                                                                                                                                                                                                                                                                                                                                                                                                                                                                                                                                                                                                                                                                                                                                                                                                                                                                                                                                                                                                                                                                                                                                                                                                                                                                                                                     | -1.038854946 | 0.147327630  |              |              |   |             |              |             |   |             |              |              |   |              |              |              |   |              |              |              |   |             |              |              |   |             |              |              |   |              |              |              |   |              |             |              |   |             |             |              |   |              |             |              |   |              |             |              |   |              |              |              |   |              |              |              |   |              |              |              |   |              |              |              |   |              |              |              |   |              |              |              |   |             |              |             |   |             |              |              |   |              |             |              |   |              |              |             |   |             |              |             |   |             |             |             |   |             |             |             |   |             |              |             |   |             |             |             |   |             |             |             |   |             |             |              |   |             |             |              |   |             |             |             |   |             |             |             |   |              |             |              |   |              |             |              |   |              |             |              |   |              |             |              |   |              |              |              |   |              |              |             |   |              |             |             |   |              |              |             |
| C                                                                                                                                                                                       | 3.859205102                                                                                                                                                                                                                                                                                                                                                                                                                                                                                                                                                                                                                                                                                                                                                                                                                                                                                                                                                                                                                                                                                                                                                                                                                                                                                                                                                                                                                                                                                                                                                                                                                                                                                                                                                                                                                                                                                                                                                                                                                                                                                                                                                                                                                                                                                                                                                                                                                                                                                                                                                                                                                                                                                                                                                                                                                                                                                                                                                                                                                                                                                                                                                                                                                                                                                                                                                                                                                                     | 0.318518497  | 0.166632276  |              |              |   |             |              |             |   |             |              |              |   |              |              |              |   |              |              |              |   |             |              |              |   |             |              |              |   |              |              |              |   |              |             |              |   |             |             |              |   |              |             |              |   |              |             |              |   |              |              |              |   |              |              |              |   |              |              |              |   |              |              |              |   |              |              |              |   |              |              |              |   |             |              |             |   |             |              |              |   |              |             |              |   |              |              |             |   |             |              |             |   |             |             |             |   |             |             |             |   |             |              |             |   |             |             |             |   |             |             |             |   |             |             |              |   |             |             |              |   |             |             |             |   |             |             |             |   |              |             |              |   |              |             |              |   |              |             |              |   |              |             |              |   |              |              |              |   |              |              |             |   |              |             |             |   |              |              |             |
| C                                                                                                                                                                                       | 2.731433367                                                                                                                                                                                                                                                                                                                                                                                                                                                                                                                                                                                                                                                                                                                                                                                                                                                                                                                                                                                                                                                                                                                                                                                                                                                                                                                                                                                                                                                                                                                                                                                                                                                                                                                                                                                                                                                                                                                                                                                                                                                                                                                                                                                                                                                                                                                                                                                                                                                                                                                                                                                                                                                                                                                                                                                                                                                                                                                                                                                                                                                                                                                                                                                                                                                                                                                                                                                                                                     | 1.165515548  | 0.071920704  |              |              |   |             |              |             |   |             |              |              |   |              |              |              |   |              |              |              |   |             |              |              |   |             |              |              |   |              |              |              |   |              |             |              |   |             |             |              |   |              |             |              |   |              |             |              |   |              |              |              |   |              |              |              |   |              |              |              |   |              |              |              |   |              |              |              |   |              |              |              |   |             |              |             |   |             |              |              |   |              |             |              |   |              |              |             |   |             |              |             |   |             |             |             |   |             |             |             |   |             |              |             |   |             |             |             |   |             |             |             |   |             |             |              |   |             |             |              |   |             |             |             |   |             |             |             |   |              |             |              |   |              |             |              |   |              |             |              |   |              |             |              |   |              |              |              |   |              |              |             |   |              |             |             |   |              |              |             |
| H                                                                                                                                                                                       | 4.596578550                                                                                                                                                                                                                                                                                                                                                                                                                                                                                                                                                                                                                                                                                                                                                                                                                                                                                                                                                                                                                                                                                                                                                                                                                                                                                                                                                                                                                                                                                                                                                                                                                                                                                                                                                                                                                                                                                                                                                                                                                                                                                                                                                                                                                                                                                                                                                                                                                                                                                                                                                                                                                                                                                                                                                                                                                                                                                                                                                                                                                                                                                                                                                                                                                                                                                                                                                                                                                                     | -1.674868940 | 0.220064836  |              |              |   |             |              |             |   |             |              |              |   |              |              |              |   |              |              |              |   |             |              |              |   |             |              |              |   |              |              |              |   |              |             |              |   |             |             |              |   |              |             |              |   |              |             |              |   |              |              |              |   |              |              |              |   |              |              |              |   |              |              |              |   |              |              |              |   |              |              |              |   |             |              |             |   |             |              |              |   |              |             |              |   |              |              |             |   |             |              |             |   |             |             |             |   |             |             |             |   |             |              |             |   |             |             |             |   |             |             |             |   |             |             |              |   |             |             |              |   |             |             |             |   |             |             |             |   |              |             |              |   |              |             |              |   |              |             |              |   |              |             |              |   |              |              |              |   |              |              |             |   |              |             |             |   |              |              |             |
| H                                                                                                                                                                                       | 4.836870508                                                                                                                                                                                                                                                                                                                                                                                                                                                                                                                                                                                                                                                                                                                                                                                                                                                                                                                                                                                                                                                                                                                                                                                                                                                                                                                                                                                                                                                                                                                                                                                                                                                                                                                                                                                                                                                                                                                                                                                                                                                                                                                                                                                                                                                                                                                                                                                                                                                                                                                                                                                                                                                                                                                                                                                                                                                                                                                                                                                                                                                                                                                                                                                                                                                                                                                                                                                                                                     | 0.770939807  | 0.254691290  |              |              |   |             |              |             |   |             |              |              |   |              |              |              |   |              |              |              |   |             |              |              |   |             |              |              |   |              |              |              |   |              |             |              |   |             |             |              |   |              |             |              |   |              |             |              |   |              |              |              |   |              |              |              |   |              |              |              |   |              |              |              |   |              |              |              |   |              |              |              |   |             |              |             |   |             |              |              |   |              |             |              |   |              |              |             |   |             |              |             |   |             |             |             |   |             |             |             |   |             |              |             |   |             |             |             |   |             |             |             |   |             |             |              |   |             |             |              |   |             |             |             |   |             |             |             |   |              |             |              |   |              |             |              |   |              |             |              |   |              |             |              |   |              |              |              |   |              |              |             |   |              |             |             |   |              |              |             |
| C                                                                                                                                                                                       | 2.846143756                                                                                                                                                                                                                                                                                                                                                                                                                                                                                                                                                                                                                                                                                                                                                                                                                                                                                                                                                                                                                                                                                                                                                                                                                                                                                                                                                                                                                                                                                                                                                                                                                                                                                                                                                                                                                                                                                                                                                                                                                                                                                                                                                                                                                                                                                                                                                                                                                                                                                                                                                                                                                                                                                                                                                                                                                                                                                                                                                                                                                                                                                                                                                                                                                                                                                                                                                                                                                                     | 2.573730251  | 0.087446329  |              |              |   |             |              |             |   |             |              |              |   |              |              |              |   |              |              |              |   |             |              |              |   |             |              |              |   |              |              |              |   |              |             |              |   |             |             |              |   |              |             |              |   |              |             |              |   |              |              |              |   |              |              |              |   |              |              |              |   |              |              |              |   |              |              |              |   |              |              |              |   |             |              |             |   |             |              |              |   |              |             |              |   |              |              |             |   |             |              |             |   |             |             |             |   |             |             |             |   |             |              |             |   |             |             |             |   |             |             |             |   |             |             |              |   |             |             |              |   |             |             |             |   |             |             |             |   |              |             |              |   |              |             |              |   |              |             |              |   |              |             |              |   |              |              |              |   |              |              |             |   |              |             |             |   |              |              |             |
| C                                                                                                                                                                                       | 1.739427164                                                                                                                                                                                                                                                                                                                                                                                                                                                                                                                                                                                                                                                                                                                                                                                                                                                                                                                                                                                                                                                                                                                                                                                                                                                                                                                                                                                                                                                                                                                                                                                                                                                                                                                                                                                                                                                                                                                                                                                                                                                                                                                                                                                                                                                                                                                                                                                                                                                                                                                                                                                                                                                                                                                                                                                                                                                                                                                                                                                                                                                                                                                                                                                                                                                                                                                                                                                                                                     | 3.371195342  | -0.009604151 |              |              |   |             |              |             |   |             |              |              |   |              |              |              |   |              |              |              |   |             |              |              |   |             |              |              |   |              |              |              |   |              |             |              |   |             |             |              |   |              |             |              |   |              |             |              |   |              |              |              |   |              |              |              |   |              |              |              |   |              |              |              |   |              |              |              |   |              |              |              |   |             |              |             |   |             |              |              |   |              |             |              |   |              |              |             |   |             |              |             |   |             |             |             |   |             |             |             |   |             |              |             |   |             |             |             |   |             |             |             |   |             |             |              |   |             |             |              |   |             |             |             |   |             |             |             |   |              |             |              |   |              |             |              |   |              |             |              |   |              |             |              |   |              |              |              |   |              |              |             |   |              |             |             |   |              |              |             |
| C                                                                                                                                                                                       | 0.451251363                                                                                                                                                                                                                                                                                                                                                                                                                                                                                                                                                                                                                                                                                                                                                                                                                                                                                                                                                                                                                                                                                                                                                                                                                                                                                                                                                                                                                                                                                                                                                                                                                                                                                                                                                                                                                                                                                                                                                                                                                                                                                                                                                                                                                                                                                                                                                                                                                                                                                                                                                                                                                                                                                                                                                                                                                                                                                                                                                                                                                                                                                                                                                                                                                                                                                                                                                                                                                                     | 2.821454678  | -0.126228349 |              |              |   |             |              |             |   |             |              |              |   |              |              |              |   |              |              |              |   |             |              |              |   |             |              |              |   |              |              |              |   |              |             |              |   |             |             |              |   |              |             |              |   |              |             |              |   |              |              |              |   |              |              |              |   |              |              |              |   |              |              |              |   |              |              |              |   |              |              |              |   |             |              |             |   |             |              |              |   |              |             |              |   |              |              |             |   |             |              |             |   |             |             |             |   |             |             |             |   |             |              |             |   |             |             |             |   |             |             |             |   |             |             |              |   |             |             |              |   |             |             |             |   |             |             |             |   |              |             |              |   |              |             |              |   |              |             |              |   |              |             |              |   |              |              |              |   |              |              |             |   |              |             |             |   |              |              |             |
| H                                                                                                                                                                                       | 3.830020330                                                                                                                                                                                                                                                                                                                                                                                                                                                                                                                                                                                                                                                                                                                                                                                                                                                                                                                                                                                                                                                                                                                                                                                                                                                                                                                                                                                                                                                                                                                                                                                                                                                                                                                                                                                                                                                                                                                                                                                                                                                                                                                                                                                                                                                                                                                                                                                                                                                                                                                                                                                                                                                                                                                                                                                                                                                                                                                                                                                                                                                                                                                                                                                                                                                                                                                                                                                                                                     | 3.011628013  | 0.176382538  |              |              |   |             |              |             |   |             |              |              |   |              |              |              |   |              |              |              |   |             |              |              |   |             |              |              |   |              |              |              |   |              |             |              |   |             |             |              |   |              |             |              |   |              |             |              |   |              |              |              |   |              |              |              |   |              |              |              |   |              |              |              |   |              |              |              |   |              |              |              |   |             |              |             |   |             |              |              |   |              |             |              |   |              |              |             |   |             |              |             |   |             |             |             |   |             |             |             |   |             |              |             |   |             |             |             |   |             |             |             |   |             |             |              |   |             |             |              |   |             |             |             |   |             |             |             |   |              |             |              |   |              |             |              |   |              |             |              |   |              |             |              |   |              |              |              |   |              |              |             |   |              |             |             |   |              |              |             |
| H                                                                                                                                                                                       | 1.841937887                                                                                                                                                                                                                                                                                                                                                                                                                                                                                                                                                                                                                                                                                                                                                                                                                                                                                                                                                                                                                                                                                                                                                                                                                                                                                                                                                                                                                                                                                                                                                                                                                                                                                                                                                                                                                                                                                                                                                                                                                                                                                                                                                                                                                                                                                                                                                                                                                                                                                                                                                                                                                                                                                                                                                                                                                                                                                                                                                                                                                                                                                                                                                                                                                                                                                                                                                                                                                                     | 4.447394966  | 0.001496488  |              |              |   |             |              |             |   |             |              |              |   |              |              |              |   |              |              |              |   |             |              |              |   |             |              |              |   |              |              |              |   |              |             |              |   |             |             |              |   |              |             |              |   |              |             |              |   |              |              |              |   |              |              |              |   |              |              |              |   |              |              |              |   |              |              |              |   |              |              |              |   |             |              |             |   |             |              |              |   |              |             |              |   |              |              |             |   |             |              |             |   |             |             |             |   |             |             |             |   |             |              |             |   |             |             |             |   |             |             |             |   |             |             |              |   |             |             |              |   |             |             |             |   |             |             |             |   |              |             |              |   |              |             |              |   |              |             |              |   |              |             |              |   |              |              |              |   |              |              |             |   |              |             |             |   |              |              |             |
| C                                                                                                                                                                                       | -1.943548309                                                                                                                                                                                                                                                                                                                                                                                                                                                                                                                                                                                                                                                                                                                                                                                                                                                                                                                                                                                                                                                                                                                                                                                                                                                                                                                                                                                                                                                                                                                                                                                                                                                                                                                                                                                                                                                                                                                                                                                                                                                                                                                                                                                                                                                                                                                                                                                                                                                                                                                                                                                                                                                                                                                                                                                                                                                                                                                                                                                                                                                                                                                                                                                                                                                                                                                                                                                                                                    | 3.091925678  | -0.346118416 |              |              |   |             |              |             |   |             |              |              |   |              |              |              |   |              |              |              |   |             |              |              |   |             |              |              |   |              |              |              |   |              |             |              |   |             |             |              |   |              |             |              |   |              |             |              |   |              |              |              |   |              |              |              |   |              |              |              |   |              |              |              |   |              |              |              |   |              |              |              |   |             |              |             |   |             |              |              |   |              |             |              |   |              |              |             |   |             |              |             |   |             |             |             |   |             |             |             |   |             |              |             |   |             |             |             |   |             |             |             |   |             |             |              |   |             |             |              |   |             |             |             |   |             |             |             |   |              |             |              |   |              |             |              |   |              |             |              |   |              |             |              |   |              |              |              |   |              |              |             |   |              |             |             |   |              |              |             |
| H                                                                                                                                                                                       | -2.819005714                                                                                                                                                                                                                                                                                                                                                                                                                                                                                                                                                                                                                                                                                                                                                                                                                                                                                                                                                                                                                                                                                                                                                                                                                                                                                                                                                                                                                                                                                                                                                                                                                                                                                                                                                                                                                                                                                                                                                                                                                                                                                                                                                                                                                                                                                                                                                                                                                                                                                                                                                                                                                                                                                                                                                                                                                                                                                                                                                                                                                                                                                                                                                                                                                                                                                                                                                                                                                                    | 3.719853144  | -0.428308871 |              |              |   |             |              |             |   |             |              |              |   |              |              |              |   |              |              |              |   |             |              |              |   |             |              |              |   |              |              |              |   |              |             |              |   |             |             |              |   |              |             |              |   |              |             |              |   |              |              |              |   |              |              |              |   |              |              |              |   |              |              |              |   |              |              |              |   |              |              |              |   |             |              |             |   |             |              |              |   |              |             |              |   |              |              |             |   |             |              |             |   |             |             |             |   |             |             |             |   |             |              |             |   |             |             |             |   |             |             |             |   |             |             |              |   |             |             |              |   |             |             |             |   |             |             |             |   |              |             |              |   |              |             |              |   |              |             |              |   |              |             |              |   |              |              |              |   |              |              |             |   |              |             |             |   |              |              |             |
| C                                                                                                                                                                                       | -0.708953700                                                                                                                                                                                                                                                                                                                                                                                                                                                                                                                                                                                                                                                                                                                                                                                                                                                                                                                                                                                                                                                                                                                                                                                                                                                                                                                                                                                                                                                                                                                                                                                                                                                                                                                                                                                                                                                                                                                                                                                                                                                                                                                                                                                                                                                                                                                                                                                                                                                                                                                                                                                                                                                                                                                                                                                                                                                                                                                                                                                                                                                                                                                                                                                                                                                                                                                                                                                                                                    | 3.635010549  | -0.233444935 |              |              |   |             |              |             |   |             |              |              |   |              |              |              |   |              |              |              |   |             |              |              |   |             |              |              |   |              |              |              |   |              |             |              |   |             |             |              |   |              |             |              |   |              |             |              |   |              |              |              |   |              |              |              |   |              |              |              |   |              |              |              |   |              |              |              |   |              |              |              |   |             |              |             |   |             |              |              |   |              |             |              |   |              |              |             |   |             |              |             |   |             |             |             |   |             |             |             |   |             |              |             |   |             |             |             |   |             |             |             |   |             |             |              |   |             |             |              |   |             |             |             |   |             |             |             |   |              |             |              |   |              |             |              |   |              |             |              |   |              |             |              |   |              |              |              |   |              |              |             |   |              |             |             |   |              |              |             |
| H                                                                                                                                                                                       | -0.580979940                                                                                                                                                                                                                                                                                                                                                                                                                                                                                                                                                                                                                                                                                                                                                                                                                                                                                                                                                                                                                                                                                                                                                                                                                                                                                                                                                                                                                                                                                                                                                                                                                                                                                                                                                                                                                                                                                                                                                                                                                                                                                                                                                                                                                                                                                                                                                                                                                                                                                                                                                                                                                                                                                                                                                                                                                                                                                                                                                                                                                                                                                                                                                                                                                                                                                                                                                                                                                                    | 4.708391557  | -0.224232895 |              |              |   |             |              |             |   |             |              |              |   |              |              |              |   |              |              |              |   |             |              |              |   |             |              |              |   |              |              |              |   |              |             |              |   |             |             |              |   |              |             |              |   |              |             |              |   |              |              |              |   |              |              |              |   |              |              |              |   |              |              |              |   |              |              |              |   |              |              |              |   |             |              |             |   |             |              |              |   |              |             |              |   |              |              |             |   |             |              |             |   |             |             |             |   |             |             |             |   |             |              |             |   |             |             |             |   |             |             |             |   |             |             |              |   |             |             |              |   |             |             |             |   |             |             |             |   |              |             |              |   |              |             |              |   |              |             |              |   |              |             |              |   |              |              |              |   |              |              |             |   |              |             |             |   |              |              |             |
| H                                                                                                                                                                                       | -4.222844443                                                                                                                                                                                                                                                                                                                                                                                                                                                                                                                                                                                                                                                                                                                                                                                                                                                                                                                                                                                                                                                                                                                                                                                                                                                                                                                                                                                                                                                                                                                                                                                                                                                                                                                                                                                                                                                                                                                                                                                                                                                                                                                                                                                                                                                                                                                                                                                                                                                                                                                                                                                                                                                                                                                                                                                                                                                                                                                                                                                                                                                                                                                                                                                                                                                                                                                                                                                                                                    | -0.626251696 | -1.327557226 |              |              |   |             |              |             |   |             |              |              |   |              |              |              |   |              |              |              |   |             |              |              |   |             |              |              |   |              |              |              |   |              |             |              |   |             |             |              |   |              |             |              |   |              |             |              |   |              |              |              |   |              |              |              |   |              |              |              |   |              |              |              |   |              |              |              |   |              |              |              |   |             |              |             |   |             |              |              |   |              |             |              |   |              |              |             |   |             |              |             |   |             |             |             |   |             |             |             |   |             |              |             |   |             |             |             |   |             |             |             |   |             |             |              |   |             |             |              |   |             |             |             |   |             |             |             |   |              |             |              |   |              |             |              |   |              |             |              |   |              |             |              |   |              |              |              |   |              |              |             |   |              |             |             |   |              |              |             |
| O                                                                                                                                                                                       | -2.577612215                                                                                                                                                                                                                                                                                                                                                                                                                                                                                                                                                                                                                                                                                                                                                                                                                                                                                                                                                                                                                                                                                                                                                                                                                                                                                                                                                                                                                                                                                                                                                                                                                                                                                                                                                                                                                                                                                                                                                                                                                                                                                                                                                                                                                                                                                                                                                                                                                                                                                                                                                                                                                                                                                                                                                                                                                                                                                                                                                                                                                                                                                                                                                                                                                                                                                                                                                                                                                                    | -0.089407473 | 2.695579567  |              |              |   |             |              |             |   |             |              |              |   |              |              |              |   |              |              |              |   |             |              |              |   |             |              |              |   |              |              |              |   |              |             |              |   |             |             |              |   |              |             |              |   |              |             |              |   |              |              |              |   |              |              |              |   |              |              |              |   |              |              |              |   |              |              |              |   |              |              |              |   |             |              |             |   |             |              |              |   |              |             |              |   |              |              |             |   |             |              |             |   |             |             |             |   |             |             |             |   |             |              |             |   |             |             |             |   |             |             |             |   |             |             |              |   |             |             |              |   |             |             |             |   |             |             |             |   |              |             |              |   |              |             |              |   |              |             |              |   |              |             |              |   |              |              |              |   |              |              |             |   |              |             |             |   |              |              |             |
| H                                                                                                                                                                                       | -2.386960743                                                                                                                                                                                                                                                                                                                                                                                                                                                                                                                                                                                                                                                                                                                                                                                                                                                                                                                                                                                                                                                                                                                                                                                                                                                                                                                                                                                                                                                                                                                                                                                                                                                                                                                                                                                                                                                                                                                                                                                                                                                                                                                                                                                                                                                                                                                                                                                                                                                                                                                                                                                                                                                                                                                                                                                                                                                                                                                                                                                                                                                                                                                                                                                                                                                                                                                                                                                                                                    | 0.697952830  | 2.179840603  |              |              |   |             |              |             |   |             |              |              |   |              |              |              |   |              |              |              |   |             |              |              |   |             |              |              |   |              |              |              |   |              |             |              |   |             |             |              |   |              |             |              |   |              |             |              |   |              |              |              |   |              |              |              |   |              |              |              |   |              |              |              |   |              |              |              |   |              |              |              |   |             |              |             |   |             |              |              |   |              |             |              |   |              |              |             |   |             |              |             |   |             |             |             |   |             |             |             |   |             |              |             |   |             |             |             |   |             |             |             |   |             |             |              |   |             |             |              |   |             |             |             |   |             |             |             |   |              |             |              |   |              |             |              |   |              |             |              |   |              |             |              |   |              |              |              |   |              |              |             |   |              |             |             |   |              |              |             |
| H                                                                                                                                                                                       | -1.926726963                                                                                                                                                                                                                                                                                                                                                                                                                                                                                                                                                                                                                                                                                                                                                                                                                                                                                                                                                                                                                                                                                                                                                                                                                                                                                                                                                                                                                                                                                                                                                                                                                                                                                                                                                                                                                                                                                                                                                                                                                                                                                                                                                                                                                                                                                                                                                                                                                                                                                                                                                                                                                                                                                                                                                                                                                                                                                                                                                                                                                                                                                                                                                                                                                                                                                                                                                                                                                                    | -0.747714485 | 2.442278304  |              |              |   |             |              |             |   |             |              |              |   |              |              |              |   |              |              |              |   |             |              |              |   |             |              |              |   |              |              |              |   |              |             |              |   |             |             |              |   |              |             |              |   |              |             |              |   |              |              |              |   |              |              |              |   |              |              |              |   |              |              |              |   |              |              |              |   |              |              |              |   |             |              |             |   |             |              |              |   |              |             |              |   |              |              |             |   |             |              |             |   |             |             |             |   |             |             |             |   |             |              |             |   |             |             |             |   |             |             |             |   |             |             |              |   |             |             |              |   |             |             |             |   |             |             |             |   |              |             |              |   |              |             |              |   |              |             |              |   |              |             |              |   |              |              |              |   |              |              |             |   |              |             |             |   |              |              |             |
|                                                                                                      | <table border="1"> <tbody> <tr><td>C</td><td>2.151884621</td><td>-3.061299687</td><td>0.124316771</td></tr> <tr><td>C</td><td>2.311912856</td><td>-1.653786178</td><td>0.156090142</td></tr> <tr><td>C</td><td>1.174357505</td><td>-0.832463092</td><td>-0.012615679</td></tr> <tr><td>C</td><td>-0.101889890</td><td>-1.417361686</td><td>-0.207738897</td></tr> <tr><td>C</td><td>-0.230908895</td><td>-2.824799084</td><td>-0.234218288</td></tr> <tr><td>C</td><td>0.930482369</td><td>-3.625050158</td><td>-0.063635016</td></tr> </tbody> </table>                                                                                                                                                                                                                                                                                                                                                                                                                                                                                                                                                                                                                                                                                                                                                                                                                                                                                                                                                                                                                                                                                                                                                                                                                                                                                                                                                                                                                                                                                                                                                                                                                                                                                                                                                                                                                                                                                                                                                                                                                                                                                                                                                                                                                                                                                                                                                                                                                                                                                                                                                                                                                                                                                                                                                                                                                                                                                        | C            | 2.151884621  | -3.061299687 | 0.124316771  | C | 2.311912856 | -1.653786178 | 0.156090142 | C | 1.174357505 | -0.832463092 | -0.012615679 | C | -0.101889890 | -1.417361686 | -0.207738897 | C | -0.230908895 | -2.824799084 | -0.234218288 | C | 0.930482369 | -3.625050158 | -0.063635016 |   |             |              |              |   |              |              |              |   |              |             |              |   |             |             |              |   |              |             |              |   |              |             |              |   |              |              |              |   |              |              |              |   |              |              |              |   |              |              |              |   |              |              |              |   |              |              |              |   |             |              |             |   |             |              |              |   |              |             |              |   |              |              |             |   |             |              |             |   |             |             |             |   |             |             |             |   |             |              |             |   |             |             |             |   |             |             |             |   |             |             |              |   |             |             |              |   |             |             |             |   |             |             |             |   |              |             |              |   |              |             |              |   |              |             |              |   |              |             |              |   |              |              |              |   |              |              |             |   |              |             |             |   |              |              |             |
| C                                                                                                                                                                                       | 2.151884621                                                                                                                                                                                                                                                                                                                                                                                                                                                                                                                                                                                                                                                                                                                                                                                                                                                                                                                                                                                                                                                                                                                                                                                                                                                                                                                                                                                                                                                                                                                                                                                                                                                                                                                                                                                                                                                                                                                                                                                                                                                                                                                                                                                                                                                                                                                                                                                                                                                                                                                                                                                                                                                                                                                                                                                                                                                                                                                                                                                                                                                                                                                                                                                                                                                                                                                                                                                                                                     | -3.061299687 | 0.124316771  |              |              |   |             |              |             |   |             |              |              |   |              |              |              |   |              |              |              |   |             |              |              |   |             |              |              |   |              |              |              |   |              |             |              |   |             |             |              |   |              |             |              |   |              |             |              |   |              |              |              |   |              |              |              |   |              |              |              |   |              |              |              |   |              |              |              |   |              |              |              |   |             |              |             |   |             |              |              |   |              |             |              |   |              |              |             |   |             |              |             |   |             |             |             |   |             |             |             |   |             |              |             |   |             |             |             |   |             |             |             |   |             |             |              |   |             |             |              |   |             |             |             |   |             |             |             |   |              |             |              |   |              |             |              |   |              |             |              |   |              |             |              |   |              |              |              |   |              |              |             |   |              |             |             |   |              |              |             |
| C                                                                                                                                                                                       | 2.311912856                                                                                                                                                                                                                                                                                                                                                                                                                                                                                                                                                                                                                                                                                                                                                                                                                                                                                                                                                                                                                                                                                                                                                                                                                                                                                                                                                                                                                                                                                                                                                                                                                                                                                                                                                                                                                                                                                                                                                                                                                                                                                                                                                                                                                                                                                                                                                                                                                                                                                                                                                                                                                                                                                                                                                                                                                                                                                                                                                                                                                                                                                                                                                                                                                                                                                                                                                                                                                                     | -1.653786178 | 0.156090142  |              |              |   |             |              |             |   |             |              |              |   |              |              |              |   |              |              |              |   |             |              |              |   |             |              |              |   |              |              |              |   |              |             |              |   |             |             |              |   |              |             |              |   |              |             |              |   |              |              |              |   |              |              |              |   |              |              |              |   |              |              |              |   |              |              |              |   |              |              |              |   |             |              |             |   |             |              |              |   |              |             |              |   |              |              |             |   |             |              |             |   |             |             |             |   |             |             |             |   |             |              |             |   |             |             |             |   |             |             |             |   |             |             |              |   |             |             |              |   |             |             |             |   |             |             |             |   |              |             |              |   |              |             |              |   |              |             |              |   |              |             |              |   |              |              |              |   |              |              |             |   |              |             |             |   |              |              |             |
| C                                                                                                                                                                                       | 1.174357505                                                                                                                                                                                                                                                                                                                                                                                                                                                                                                                                                                                                                                                                                                                                                                                                                                                                                                                                                                                                                                                                                                                                                                                                                                                                                                                                                                                                                                                                                                                                                                                                                                                                                                                                                                                                                                                                                                                                                                                                                                                                                                                                                                                                                                                                                                                                                                                                                                                                                                                                                                                                                                                                                                                                                                                                                                                                                                                                                                                                                                                                                                                                                                                                                                                                                                                                                                                                                                     | -0.832463092 | -0.012615679 |              |              |   |             |              |             |   |             |              |              |   |              |              |              |   |              |              |              |   |             |              |              |   |             |              |              |   |              |              |              |   |              |             |              |   |             |             |              |   |              |             |              |   |              |             |              |   |              |              |              |   |              |              |              |   |              |              |              |   |              |              |              |   |              |              |              |   |              |              |              |   |             |              |             |   |             |              |              |   |              |             |              |   |              |              |             |   |             |              |             |   |             |             |             |   |             |             |             |   |             |              |             |   |             |             |             |   |             |             |             |   |             |             |              |   |             |             |              |   |             |             |             |   |             |             |             |   |              |             |              |   |              |             |              |   |              |             |              |   |              |             |              |   |              |              |              |   |              |              |             |   |              |             |             |   |              |              |             |
| C                                                                                                                                                                                       | -0.101889890                                                                                                                                                                                                                                                                                                                                                                                                                                                                                                                                                                                                                                                                                                                                                                                                                                                                                                                                                                                                                                                                                                                                                                                                                                                                                                                                                                                                                                                                                                                                                                                                                                                                                                                                                                                                                                                                                                                                                                                                                                                                                                                                                                                                                                                                                                                                                                                                                                                                                                                                                                                                                                                                                                                                                                                                                                                                                                                                                                                                                                                                                                                                                                                                                                                                                                                                                                                                                                    | -1.417361686 | -0.207738897 |              |              |   |             |              |             |   |             |              |              |   |              |              |              |   |              |              |              |   |             |              |              |   |             |              |              |   |              |              |              |   |              |             |              |   |             |             |              |   |              |             |              |   |              |             |              |   |              |              |              |   |              |              |              |   |              |              |              |   |              |              |              |   |              |              |              |   |              |              |              |   |             |              |             |   |             |              |              |   |              |             |              |   |              |              |             |   |             |              |             |   |             |             |             |   |             |             |             |   |             |              |             |   |             |             |             |   |             |             |             |   |             |             |              |   |             |             |              |   |             |             |             |   |             |             |             |   |              |             |              |   |              |             |              |   |              |             |              |   |              |             |              |   |              |              |              |   |              |              |             |   |              |             |             |   |              |              |             |
| C                                                                                                                                                                                       | -0.230908895                                                                                                                                                                                                                                                                                                                                                                                                                                                                                                                                                                                                                                                                                                                                                                                                                                                                                                                                                                                                                                                                                                                                                                                                                                                                                                                                                                                                                                                                                                                                                                                                                                                                                                                                                                                                                                                                                                                                                                                                                                                                                                                                                                                                                                                                                                                                                                                                                                                                                                                                                                                                                                                                                                                                                                                                                                                                                                                                                                                                                                                                                                                                                                                                                                                                                                                                                                                                                                    | -2.824799084 | -0.234218288 |              |              |   |             |              |             |   |             |              |              |   |              |              |              |   |              |              |              |   |             |              |              |   |             |              |              |   |              |              |              |   |              |             |              |   |             |             |              |   |              |             |              |   |              |             |              |   |              |              |              |   |              |              |              |   |              |              |              |   |              |              |              |   |              |              |              |   |              |              |              |   |             |              |             |   |             |              |              |   |              |             |              |   |              |              |             |   |             |              |             |   |             |             |             |   |             |             |             |   |             |              |             |   |             |             |             |   |             |             |             |   |             |             |              |   |             |             |              |   |             |             |             |   |             |             |             |   |              |             |              |   |              |             |              |   |              |             |              |   |              |             |              |   |              |              |              |   |              |              |             |   |              |             |             |   |              |              |             |
| C                                                                                                                                                                                       | 0.930482369                                                                                                                                                                                                                                                                                                                                                                                                                                                                                                                                                                                                                                                                                                                                                                                                                                                                                                                                                                                                                                                                                                                                                                                                                                                                                                                                                                                                                                                                                                                                                                                                                                                                                                                                                                                                                                                                                                                                                                                                                                                                                                                                                                                                                                                                                                                                                                                                                                                                                                                                                                                                                                                                                                                                                                                                                                                                                                                                                                                                                                                                                                                                                                                                                                                                                                                                                                                                                                     | -3.625050158 | -0.063635016 |              |              |   |             |              |             |   |             |              |              |   |              |              |              |   |              |              |              |   |             |              |              |   |             |              |              |   |              |              |              |   |              |             |              |   |             |             |              |   |              |             |              |   |              |             |              |   |              |              |              |   |              |              |              |   |              |              |              |   |              |              |              |   |              |              |              |   |              |              |              |   |             |              |             |   |             |              |              |   |              |             |              |   |              |              |             |   |             |              |             |   |             |             |             |   |             |             |             |   |             |              |             |   |             |             |             |   |             |             |             |   |             |             |              |   |             |             |              |   |             |             |             |   |             |             |             |   |              |             |              |   |              |             |              |   |              |             |              |   |              |             |              |   |              |              |              |   |              |              |             |   |              |             |             |   |              |              |             |

|  |                                                                                                                                                                                                                                                                                                                                                                                                                                                                                                                                                                                                                                                                                                                                                                                                                                                                                                                                                                                                                                  |                                                                                                                                                                                                                                                                                                                                                                                                                                                                                                                                                                                                                                                                                                                                                                                                                                                                                                                                                                                                                                                                                                                                                                                                                                                                                                                                                                                                                                                                                                                                                                            |
|--|----------------------------------------------------------------------------------------------------------------------------------------------------------------------------------------------------------------------------------------------------------------------------------------------------------------------------------------------------------------------------------------------------------------------------------------------------------------------------------------------------------------------------------------------------------------------------------------------------------------------------------------------------------------------------------------------------------------------------------------------------------------------------------------------------------------------------------------------------------------------------------------------------------------------------------------------------------------------------------------------------------------------------------|----------------------------------------------------------------------------------------------------------------------------------------------------------------------------------------------------------------------------------------------------------------------------------------------------------------------------------------------------------------------------------------------------------------------------------------------------------------------------------------------------------------------------------------------------------------------------------------------------------------------------------------------------------------------------------------------------------------------------------------------------------------------------------------------------------------------------------------------------------------------------------------------------------------------------------------------------------------------------------------------------------------------------------------------------------------------------------------------------------------------------------------------------------------------------------------------------------------------------------------------------------------------------------------------------------------------------------------------------------------------------------------------------------------------------------------------------------------------------------------------------------------------------------------------------------------------------|
|  | 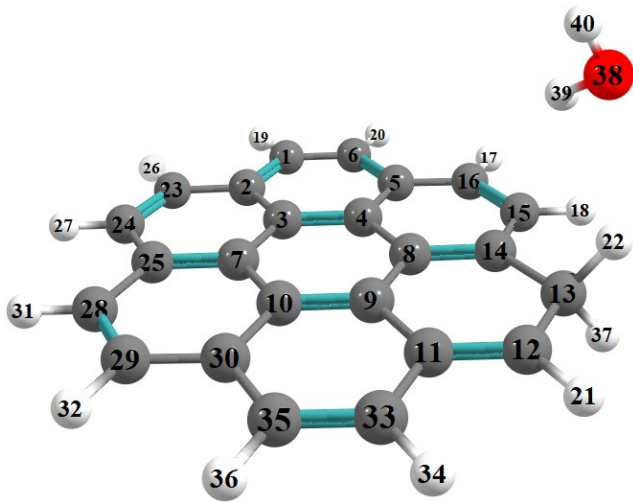 <p style="text-align: center;"><b>C3-CorH<sup>+</sup>-W<sub>1</sub></b><br/><b>[-63.14534884]</b></p>                                                                                                                                                                                                                                                                                                                                                                                                                                                                                                                                                                                                                                                                                                                                                                                                                                        | <p>C 1.310661090 0.576486934 0.018560632<br/> C -1.246880499 -0.593618350 -0.370118070<br/> C -1.101058846 0.824453993 -0.337832621<br/> C 0.165547478 1.402929876 -0.146556550<br/> C -2.256162056 1.662526173 -0.498783327<br/> C -3.491536180 1.110169266 -0.680684176<br/> C -3.735017874 -0.352957579 -0.721966602<br/> C -2.502690116 -1.190162745 -0.555417358<br/> C -2.606769176 -2.577249421 -0.580988250<br/> C -1.501603371 -3.383897356 -0.425023823<br/> H -1.605598710 -4.458835591 -0.446591345<br/> H -3.580237358 -3.025286134 -0.725486917<br/> H 3.028625622 -3.679749832 0.255005675<br/> H 0.817426102 -4.699535749 -0.085182324<br/> H -4.354041385 1.749677578 -0.801330494<br/> H -4.462936201 -0.621158143 0.058431733<br/> C 3.569915575 -1.045991604 0.352855092<br/> C 3.701437376 0.311448476 0.382890720<br/> C 2.581552265 1.158398018 0.217952960<br/> H 4.434878585 -1.681415567 0.480400198<br/> H 4.670951876 0.764284126 0.534095691<br/> C 2.693001943 2.566553373 0.248811548<br/> C 1.592831654 3.363185511 0.089835050<br/> C 0.314907781 2.813302881 -0.109108831<br/> H 3.668807691 3.004454853 0.401708507<br/> H 1.692826700 4.439159550 0.116587037<br/> C -2.064093976 3.082150764 -0.458536375<br/> H -2.935062512 3.709791537 -0.580371777<br/> C -0.839074812 3.626175394 -0.272229061<br/> H -0.714011122 4.699447322 -0.242351751<br/> H -4.226075095 -0.613406046 -1.671247791<br/> O -0.365397499 0.059869370 2.936015434<br/> H 0.529456987 0.142163618 2.598535606<br/> H -0.946130347 0.045257987 2.171614111</p> |
|  | <p>C 2.312229623 -2.997237740 0.063083500<br/> C 2.501421482 -1.593412063 0.025213189<br/> C 1.368864078 -0.752945562 -0.065912424<br/> C 0.069285945 -1.315102144 -0.117583843<br/> C -0.088678732 -2.720099450 -0.079248037<br/> C 1.068067908 -3.540119383 0.012884666<br/> C 1.534105883 0.651576393 -0.107180186<br/> C -1.069317564 -0.472112773 -0.206037818<br/> C -0.894246276 0.940753699 -0.248101816<br/> C 0.395255637 1.496144651 -0.201387519<br/> C -2.042910607 1.796892665 -0.347756671<br/> C -3.300596248 1.265953713 -0.390445869<br/> C -3.575744671 -0.188365855 -0.315669532<br/> C -2.348741000 -1.045424145 -0.254594310<br/> C -2.481942094 -2.431199797 -0.221037961<br/> C -1.382058499 -3.257355664 -0.134823792<br/> H -1.508214563 -4.330237519 -0.110798298<br/> H -3.473319843 -2.861023595 -0.264352442<br/> H 3.185424294 -3.630946445 0.132107957<br/> H 0.932884039 -4.612222742 0.040843943<br/> H -4.157544875 1.919621167 -0.468673510<br/> H -4.190425007 -0.392047571 0.574765689</p> |                                                                                                                                                                                                                                                                                                                                                                                                                                                                                                                                                                                                                                                                                                                                                                                                                                                                                                                                                                                                                                                                                                                                                                                                                                                                                                                                                                                                                                                                                                                                                                            |

|                                                                                                                                                                                       |             |              |              |              |
|---------------------------------------------------------------------------------------------------------------------------------------------------------------------------------------|-------------|--------------|--------------|--------------|
|                                                                                                                                                                                       | C           | 3.784114362  | -1.008146211 | 0.074645715  |
|                                                                                                                                                                                       | C           | 3.943601611  | 0.345973717  | 0.034834463  |
|                                                                                                                                                                                       | C           | 2.829276500  | 1.211030128  | -0.057574566 |
|                                                                                                                                                                                       | H           | 4.645282677  | -1.658089122 | 0.144422022  |
|                                                                                                                                                                                       | H           | 4.932090113  | 0.781862755  | 0.072616673  |
|                                                                                                                                                                                       | C           | 2.971011423  | 2.615992454  | -0.103160756 |
|                                                                                                                                                                                       | C           | 1.876523139  | 3.430837674  | -0.197095913 |
|                                                                                                                                                                                       | C           | 0.575207170  | 2.902938039  | -0.249404921 |
|                                                                                                                                                                                       | H           | 3.965434965  | 3.037351437  | -0.063990515 |
|                                                                                                                                                                                       | H           | 1.999921170  | 4.504455585  | -0.233368907 |
|                                                                                                                                                                                       | C           | -1.819965543 | 3.211699019  | -0.401349546 |
|                                                                                                                                                                                       | H           | -2.685754541 | 3.853717060  | -0.480063912 |
|                                                                                                                                                                                       | C           | -0.572646828 | 3.734578978  | -0.351956492 |
|                                                                                                                                                                                       | H           | -0.424169332 | 4.804921523  | -0.390747434 |
|                                                                                                                                                                                       | H           | -4.198323875 | -0.492242060 | -1.168543838 |
|                                                                                                                                                                                       | O           | -3.774502732 | -1.565977786 | 2.665965114  |
|                                                                                                                                                                                       | H           | -3.083226930 | -2.013940541 | 2.169679296  |
|                                                                                                                                                                                       | H           | -3.379084616 | -1.257256434 | 3.483268982  |
| 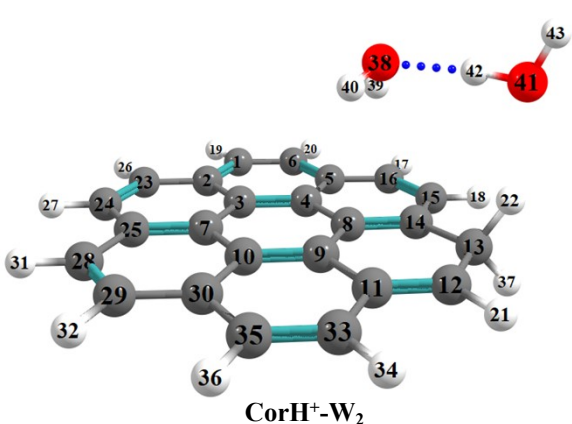 <p style="text-align: center;"><b>CorH<sup>+</sup>-W<sub>2</sub></b><br/><b>[-68.22943558]</b></p> | C           | -1.175628439 | -3.617927886 | 0.190991104  |
|                                                                                                                                                                                       | C           | -1.861530883 | -2.389078911 | 0.025691285  |
|                                                                                                                                                                                       | C           | -1.137038774 | -1.180931914 | 0.139046743  |
|                                                                                                                                                                                       | C           | 0.252813811  | -1.209357112 | 0.413605334  |
|                                                                                                                                                                                       | C           | 0.911145921  | -2.451810137 | 0.574889156  |
|                                                                                                                                                                                       | C           | 0.156472005  | -3.649948387 | 0.455102953  |
|                                                                                                                                                                                       | C           | -1.800723932 | 0.058428370  | -0.020561064 |
|                                                                                                                                                                                       | C           | 0.985434584  | 0.003182147  | 0.519077061  |
|                                                                                                                                                                                       | C           | 0.308759476  | 1.246329323  | 0.357481015  |
|                                                                                                                                                                                       | C           | -1.071371490 | 1.272609844  | 0.095095127  |
|                                                                                                                                                                                       | C           | 1.042310832  | 2.475008632  | 0.478492245  |
|                                                                                                                                                                                       | C           | 2.385786548  | 2.456657517  | 0.725699412  |
|                                                                                                                                                                                       | C           | 3.175888659  | 1.210712144  | 0.843307967  |
|                                                                                                                                                                                       | C           | 2.364012781  | -0.043628930 | 0.780326051  |
|                                                                                                                                                                                       | C           | 2.990010237  | -1.275959537 | 0.943886576  |
|                                                                                                                                                                                       | C           | 2.287907222  | -2.458018964 | 0.844524559  |
|                                                                                                                                                                                       | H           | 2.792957460  | -3.404118283 | 0.974979587  |
|                                                                                                                                                                                       | H           | 4.051366901  | -1.297685157 | 1.143115268  |
|                                                                                                                                                                                       | H           | -1.739590278 | -4.535858561 | 0.103246106  |
|                                                                                                                                                                                       | H           | 0.671358263  | -4.591762133 | 0.581542372  |
|                                                                                                                                                                                       | H           | 2.925985406  | 3.387451784  | 0.820914972  |
|                                                                                                                                                                                       | H           | 3.913427656  | 1.180106887  | 0.025354558  |
|                                                                                                                                                                                       | C           | -3.244407134 | -2.332462087 | -0.247092092 |
|                                                                                                                                                                                       | C           | -3.885012125 | -1.137835160 | -0.399037086 |
|                                                                                                                                                                                       | C           | -3.186267298 | 0.086298312  | -0.289535515 |
|                                                                                                                                                                                       | H           | -3.791450215 | -3.260932091 | -0.332652600 |
|                                                                                                                                                                                       | H           | -4.945498466 | -1.108242140 | -0.605886701 |
|                                                                                                                                                                                       | C           | -3.829973372 | 1.334928364  | -0.438481704 |
|                                                                                                                                                                                       | C           | -3.131208091 | 2.505043071  | -0.321809210 |
|                                                                                                                                                                                       | C           | -1.751780369 | 2.508875031  | -0.054375878 |
|                                                                                                                                                                                       | H           | -4.890667522 | 1.348898030  | -0.644516263 |
|                                                                                                                                                                                       | H           | -3.637583264 | 3.453676666  | -0.434400792 |
|                                                                                                                                                                                       | C           | 0.317294925  | 3.702705089  | 0.333679914  |
|                                                                                                                                                                                       | H           | 0.869785337  | 4.626165400  | 0.431898998  |
|                                                                                                                                                                                       | C           | -1.011393001 | 3.714993627  | 0.076645259  |
|                                                                                                                                                                                       | H           | -1.540589409 | 4.651321592  | -0.033889381 |
| H                                                                                                                                                                                     | 3.772892745 | 1.228297809  | 1.764249582  |              |
| O                                                                                                                                                                                     | 2.175460145 | -0.997989132 | -2.342968274 |              |

|                                                                                                                                                                                           |                                                                                                                                                                                                                                                                                                                                                                                                                                                                                                                                                                                                                                                                                                                                                                                                                                                                                                                                                                                                                                                                                                                                                                                                                                                                                                                                                                                                                                                                                                                                                                                                                                                                                                                                                                                                                                                                                             |
|-------------------------------------------------------------------------------------------------------------------------------------------------------------------------------------------|---------------------------------------------------------------------------------------------------------------------------------------------------------------------------------------------------------------------------------------------------------------------------------------------------------------------------------------------------------------------------------------------------------------------------------------------------------------------------------------------------------------------------------------------------------------------------------------------------------------------------------------------------------------------------------------------------------------------------------------------------------------------------------------------------------------------------------------------------------------------------------------------------------------------------------------------------------------------------------------------------------------------------------------------------------------------------------------------------------------------------------------------------------------------------------------------------------------------------------------------------------------------------------------------------------------------------------------------------------------------------------------------------------------------------------------------------------------------------------------------------------------------------------------------------------------------------------------------------------------------------------------------------------------------------------------------------------------------------------------------------------------------------------------------------------------------------------------------------------------------------------------------|
|                                                                                                                                                                                           | H 2.136149168 -1.690359597 -1.676594472<br>H 1.459253520 -0.388415655 -2.146292906<br>O 4.574884978 0.383294070 -1.878707600<br>H 3.767773349 -0.110783224 -2.099711047<br>H 5.107632646 0.393066027 -2.675209551                                                                                                                                                                                                                                                                                                                                                                                                                                                                                                                                                                                                                                                                                                                                                                                                                                                                                                                                                                                                                                                                                                                                                                                                                                                                                                                                                                                                                                                                                                                                                                                                                                                                           |
| 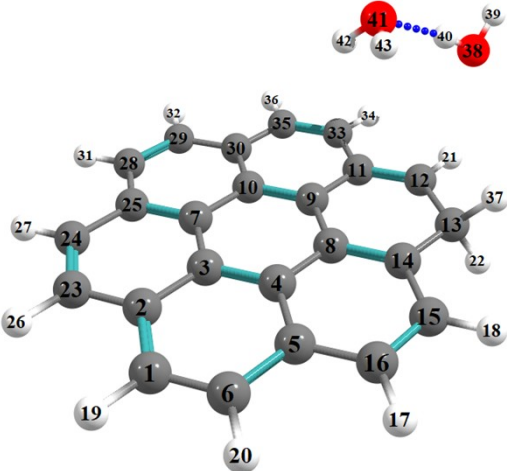 <p style="text-align: center;"><b>C2-CorH<sup>+</sup>-W<sub>2</sub></b><br/><b>[-68.22657551]</b></p>   | C -1.615947619 -3.873908643 0.690881070<br>C -2.139418755 -2.578965139 0.451615559<br>C -1.246130619 -1.524279192 0.157156176<br>C 0.148618911 -1.768611477 0.104734301<br>C 0.642515314 -3.070580159 0.349695046<br>C -0.279304983 -4.111364633 0.642668274<br>C -1.747143534 -0.223334616 -0.084137766<br>C 1.047009969 -0.711506201 -0.193155283<br>C 0.533793477 0.594367644 -0.439401225<br>C -0.848948026 0.836590703 -0.381834403<br>C 1.439614928 1.667740614 -0.740213380<br>C 2.787630758 1.452703982 -0.785078596<br>C 3.403474945 0.123644634 -0.550977833<br>C 2.425206098 -0.969466786 -0.238981893<br>C 2.889776377 -2.257675427 0.007042090<br>C 2.025460177 -3.290722768 0.294999933<br>H 2.408123990 -4.283719982 0.481558781<br>H 3.954163066 -2.445377660 -0.031071945<br>H -2.308243465 -4.673631541 0.914296299<br>H 0.111112155 -5.102303779 0.826824368<br>H 3.456084161 2.277227443 -0.980790553<br>H 3.992543072 -0.159917150 -1.435597150<br>C -3.523358520 -2.308965621 0.498523726<br>C -4.006095130 -1.054259763 0.267199853<br>C -3.136439857 0.020128542 -0.028848625<br>H -4.199965327 -3.121606993 0.723460975<br>H -5.068814408 -0.860690043 0.306659050<br>C -3.613358439 1.328001931 -0.270787504<br>C -2.750797888 2.350490337 -0.555314543<br>C -1.363102057 2.138329695 -0.619109246<br>H -4.678125746 1.506985504 -0.226931965<br>H -3.129439819 3.346537206 -0.738538295<br>C 0.883488923 2.969898993 -0.976976416<br>H 1.572801605 3.768900615 -1.207058521<br>C -0.452166120 3.188923735 -0.916890210<br>H -0.855531614 4.175346658 -1.100240189<br>H 4.138716602 0.203069635 0.263190552<br>O 3.918632797 4.326310294 0.332456414<br>H 4.356970963 5.082375112 0.725548986<br>H 3.241641253 4.044516144 0.968792589<br>O 1.825549409 3.377167119 1.973887184<br>H 1.104668473 3.477086361 1.342721783<br>H 1.961280043 2.433443256 2.086776456 |
|  <p style="text-align: center;"><b>C3-CorH<sup>+</sup>-W<sub>2</sub></b><br/><b>[-68.22638814]</b></p> | C 0.125615105 -3.091348693 -0.951912283<br>C -0.768038311 -1.993068050 -0.862921915<br>C -0.269262301 -0.729894847 -0.472518408<br>C 1.108284637 -0.569817049 -0.181559315<br>C 1.978268133 -1.680453052 -0.279882915<br>C 1.446400872 -2.940191592 -0.669489184<br>C -1.148675636 0.373855283 -0.371174008<br>C 1.611323146 0.699052667 0.205978423                                                                                                                                                                                                                                                                                                                                                                                                                                                                                                                                                                                                                                                                                                                                                                                                                                                                                                                                                                                                                                                                                                                                                                                                                                                                                                                                                                                                                                                                                                                                        |

|  |   |              |              |              |
|--|---|--------------|--------------|--------------|
|  | C | 0.720139098  | 1.806207391  | 0.302738711  |
|  | C | -0.646041734 | 1.644331791  | 0.018331818  |
|  | C | 1.224036143  | 3.092650612  | 0.694059696  |
|  | C | 2.550211125  | 3.261191198  | 0.972139426  |
|  | C | 3.547415838  | 2.164806303  | 0.895172781  |
|  | C | 2.978148722  | 0.839361356  | 0.486797121  |
|  | C | 3.817517679  | -0.265472221 | 0.384171270  |
|  | C | 3.337347441  | -1.501307452 | 0.011108375  |
|  | H | 4.007096575  | -2.345834744 | -0.062568400 |
|  | H | 4.869762515  | -0.144806523 | 0.603163710  |
|  | H | -0.276740519 | -4.050412151 | -1.243496155 |
|  | H | 2.123264537  | -3.779846585 | -0.739021570 |
|  | H | 2.919557882  | 4.233698577  | 1.265106064  |
|  | H | 4.345226470  | 2.448568760  | 0.192547703  |
|  | C | -2.145350272 | -2.132311339 | -1.143795338 |
|  | C | -2.992522562 | -1.067060778 | -1.042401208 |
|  | C | -2.521595042 | 0.209927576  | -0.656919958 |
|  | H | -2.510427970 | -3.106293296 | -1.435162395 |
|  | H | -4.044907935 | -1.183000766 | -1.259728566 |
|  | C | -3.380791140 | 1.326350981  | -0.548305147 |
|  | C | -2.899523330 | 2.550789098  | -0.174600302 |
|  | C | -1.537899520 | 2.743678241  | 0.115453374  |
|  | H | -4.430448696 | 1.194464671  | -0.768801843 |
|  | H | -3.568529731 | 3.396606450  | -0.097019058 |
|  | C | 0.292880122  | 4.178881317  | 0.780231436  |
|  | H | 0.675260129  | 5.145866519  | 1.074610486  |
|  | C | -1.021160600 | 4.008985254  | 0.504310717  |
|  | H | -1.708817825 | 4.840365007  | 0.574759883  |
|  | H | 4.048867611  | 2.060491978  | 1.868977418  |
|  | O | -2.249806110 | -5.475806027 | -0.404099182 |
|  | H | -2.625498914 | -6.307188722 | -0.111851979 |
|  | H | -2.113204015 | -4.941774249 | 0.395369227  |
|  | O | -1.726980270 | -3.667831079 | 1.695032894  |
|  | H | -2.216516294 | -2.904333917 | 1.375567441  |
|  | H | -0.797653905 | -3.485275252 | 1.530076080  |
|  | H | 3.863665019  | 0.980606644  | -0.367154862 |
|  | H | 3.670720877  | 0.976721875  | -2.103729417 |
|  | O | 1.592367408  | 1.106422024  | 2.406018682  |
|  | H | 1.092534036  | 1.513575105  | 1.694305295  |
|  | H | 2.529301027  | 1.166762345  | 2.155760921  |
|  | H | 3.706061078  | -0.492023382 | 1.828313437  |
|  | H | 4.828722498  | 0.332914473  | 2.495371641  |
|  | O | 4.226806569  | 0.332244835  | 1.749250812  |
|  | H | 1.814170637  | -1.962150559 | 1.484775707  |
|  | H | 1.803428151  | -0.764089549 | 2.467920173  |
|  | O | 2.302138362  | -1.558815079 | 2.206416056  |
|  | C | -1.401891117 | -3.610868726 | -0.175343630 |
|  | C | -2.026758581 | -2.350327350 | -0.005262355 |
|  | C | -1.261354568 | -1.177012573 | -0.190274477 |
|  | C | 0.109224593  | -1.270745301 | -0.537015699 |
|  | C | 0.706138064  | -2.543238455 | -0.702672112 |
|  | C | -0.089238303 | -3.705461071 | -0.511922395 |
|  | C | -1.865548484 | 0.092098461  | -0.030877078 |
|  | C | 0.884144207  | -0.094500959 | -0.710830196 |
|  | C | 0.265779659  | 1.180182970  | -0.554682270 |
|  | C | -1.096731076 | 1.271385828  | -0.222267223 |

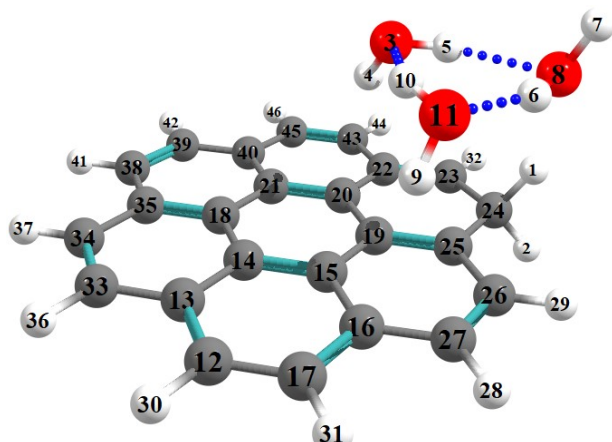

**C1-CorH<sup>+</sup>-W<sub>3</sub>**  
**[-73.31607843]**

|  |   |              |              |              |
|--|---|--------------|--------------|--------------|
|  | C | 1.039565276  | 2.375246097  | -0.755923795 |
|  | C | 2.368303800  | 2.294821821  | -1.064147809 |
|  | C | 3.104343115  | 1.012951559  | -1.164398949 |
|  | C | 2.244635583  | -0.205561199 | -1.034383662 |
|  | C | 2.809566675  | -1.466095826 | -1.202962515 |
|  | C | 2.064691552  | -2.614308150 | -1.045409865 |
|  | H | 2.522462324  | -3.583256062 | -1.179936653 |
|  | H | 3.857448013  | -1.538426651 | -1.456031295 |
|  | H | -1.997027269 | -4.501722383 | -0.032575568 |
|  | H | 0.379026110  | -4.670714591 | -0.641583208 |
|  | H | 2.938395833  | 3.199042979  | -1.220396642 |
|  | C | -3.389011070 | -2.229204584 | 0.340836487  |
|  | C | -3.971816448 | -1.005456687 | 0.493889535  |
|  | C | -3.231670867 | 0.184980766  | 0.311225913  |
|  | H | -3.967109930 | -3.131550540 | 0.482519609  |
|  | H | -5.016949783 | -0.926391354 | 0.757740919  |
|  | C | -3.816130012 | 1.463053289  | 0.456872240  |
|  | C | -3.079958991 | 2.599617350  | 0.265998972  |
|  | C | -1.718237073 | 2.538625114  | -0.075964551 |
|  | H | -4.862129435 | 1.526563011  | 0.720352791  |
|  | H | -3.540936349 | 3.571218479  | 0.376584262  |
|  | C | 0.370759765  | 3.635536314  | -0.616657382 |
|  | H | 0.951854086  | 4.532074385  | -0.777474555 |
|  | C | -0.940223329 | 3.708961867  | -0.287735208 |
|  | H | -1.425484794 | 4.668952038  | -0.181177382 |
|  | H | 4.047267874  | 0.966530786  | -0.777412985 |
|  | H | 3.615097555  | 0.974024271  | -2.470904142 |
|  | O | 2.555615621  | -1.406143202 | 2.005855426  |
|  | H | 2.352149348  | -1.888260070 | 1.200950463  |
|  | H | 1.700493141  | -1.163726473 | 2.403766668  |
|  | H | 2.888381799  | 0.375784022  | 1.852859735  |
|  | H | 3.198388775  | 1.616303292  | 2.719348757  |
|  | O | 2.719776668  | 1.334108325  | 1.937984280  |
|  | H | -0.426477848 | 0.210878192  | 2.109884851  |
|  | H | 0.974720207  | 0.786193593  | 2.431115034  |
|  | O | 0.331666985  | 0.101835407  | 2.688251242  |
|  | C | -1.245091266 | -3.618762122 | -0.143743731 |
|  | C | -1.857194476 | -2.357521030 | 0.061247770  |
|  | C | -1.102736118 | -1.185627051 | -0.171192168 |
|  | C | 0.244924381  | -1.279600068 | -0.598761054 |
|  | C | 0.828967372  | -2.553344596 | -0.795342069 |
|  | C | 0.045723519  | -3.714547438 | -0.555618881 |
|  | C | -1.693311010 | 0.085269255  | 0.029766971  |
|  | C | 1.007508781  | -0.103186561 | -0.823358532 |
|  | C | 0.405669032  | 1.171451640  | -0.622279743 |
|  | C | -0.931593732 | 1.264615460  | -0.200385645 |
|  | C | 1.170497477  | 2.364092589  | -0.850744591 |
|  | C | 2.471431553  | 2.283927902  | -1.254687913 |
|  | C | 3.185170341  | 1.001264438  | -1.459372158 |
|  | C | 2.343055442  | -0.216898207 | -1.237245034 |
|  | C | 2.897491614  | -1.478613520 | -1.429515420 |
|  | C | 2.165043794  | -2.626991310 | -1.216160099 |
|  | H | 2.614886752  | -3.596662250 | -1.372263847 |
|  | H | 3.926634497  | -1.554823997 | -1.751446333 |
|  | H | -1.831205262 | -4.508714303 | 0.036505613  |
|  | H | 0.505379667  | -4.680449969 | -0.709364711 |

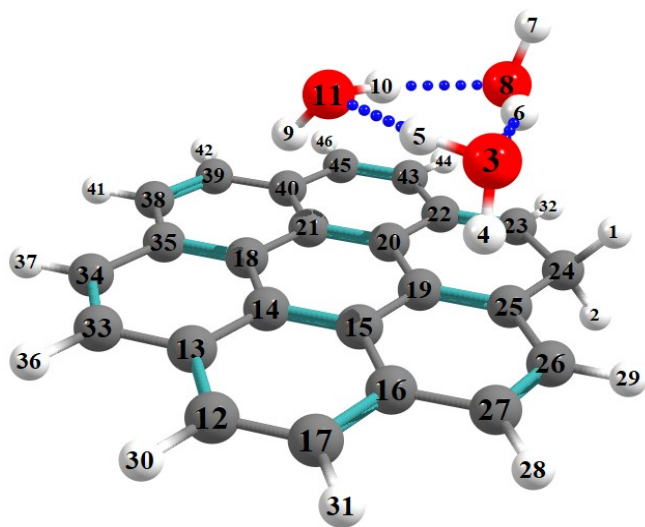

**C2-CorH<sup>+</sup>-W<sub>3</sub>**  
**[-73.31470982]**

|                                                                                                       |              |              |              |              |
|-------------------------------------------------------------------------------------------------------|--------------|--------------|--------------|--------------|
|                                                                                                       | H            | 3.039432742  | 3.187708854  | -1.420740443 |
|                                                                                                       | C            | -3.195096301 | -2.234274422 | 0.491427572  |
|                                                                                                       | C            | -3.764588911 | -1.010154178 | 0.685149405  |
|                                                                                                       | C            | -3.034445800 | 0.179655614  | 0.461911086  |
|                                                                                                       | H            | -3.765111324 | -3.135661528 | 0.666857141  |
|                                                                                                       | H            | -4.790383265 | -0.929514241 | 1.015394257  |
|                                                                                                       | C            | -3.601611565 | 1.458378438  | 0.659099758  |
|                                                                                                       | C            | -2.871723399 | 2.593892784  | 0.437092036  |
|                                                                                                       | C            | -1.535339466 | 2.532214975  | 0.007126662  |
|                                                                                                       | H            | -4.628120279 | 1.523188853  | 0.989648462  |
|                                                                                                       | H            | -3.319393173 | 3.565627690  | 0.591455406  |
|                                                                                                       | C            | 0.524232369  | 3.625070803  | -0.638355779 |
|                                                                                                       | H            | 1.102600724  | 4.520920752  | -0.811912811 |
|                                                                                                       | C            | -0.762733535 | 3.701829133  | -0.227331009 |
|                                                                                                       | H            | -1.232742755 | 4.662089667  | -0.067071952 |
| <p style="text-align: center;"><b>C3-CorH<sup>+</sup>-W<sub>3</sub></b><br/><b>[-73.31455321]</b></p> | H            | 4.128816043  | 0.957068101  | -1.080075058 |
|                                                                                                       | H            | 3.571547439  | 1.032747542  | -2.734268106 |
|                                                                                                       | O            | 2.413790365  | 1.301065067  | 1.951732715  |
|                                                                                                       | H            | 3.059196256  | 1.438190438  | 2.647530785  |
|                                                                                                       | H            | 2.232755024  | 0.341723174  | 1.942804786  |
|                                                                                                       | H            | 0.862611364  | -1.643545090 | 1.642338056  |
|                                                                                                       | H            | 0.642658553  | -0.611820984 | 2.777327660  |
|                                                                                                       | O            | 1.310115410  | -1.181861188 | 2.355300418  |
|                                                                                                       | H            | -0.865149987 | 1.390597609  | 2.446813415  |
|                                                                                                       | H            | 0.668856007  | 1.455095356  | 2.641513097  |
|                                                                                                       | O            | -0.152809092 | 1.086397050  | 3.012917412  |
|                                                                                                       | C            | -1.074135716 | -3.706274227 | -0.275633642 |
|                                                                                                       | C            | -1.681172962 | -2.461393028 | 0.025579177  |
|                                                                                                       | C            | -0.955403632 | -1.271916782 | -0.212965413 |
|                                                                                                       | C            | 0.360676294  | -1.333963450 | -0.738312003 |
|                                                                                                       | C            | 0.941491863  | -2.591770925 | -1.025563357 |
|                                                                                                       | C            | 0.185044260  | -3.770041781 | -0.781686465 |
|                                                                                                       | C            | -1.540046896 | -0.017766358 | 0.082197578  |
|                                                                                                       | C            | 1.096170235  | -0.140879279 | -0.963487505 |
|                                                                                                       | C            | 0.498285708  | 1.117193218  | -0.669237614 |
|                                                                                                       | C            | -0.806975279 | 1.177383428  | -0.154244184 |
|                                                                                                       | C            | 1.236579025  | 2.326803096  | -0.895382647 |
|                                                                                                       | C            | 2.509500705  | 2.277851309  | -1.384639002 |
|                                                                                                       | C            | 3.217326903  | 1.012296857  | -1.693328125 |
|                                                                                                       | C            | 2.402575090  | -0.223891997 | -1.465489492 |
|                                                                                                       | C            | 2.953453242  | -1.470506585 | -1.744700024 |
|                                                                                                       | C            | 2.245878784  | -2.633382282 | -1.535236381 |
|                                                                                                       | H            | 2.693018919  | -3.591037158 | -1.758099657 |
|                                                                                                       | H            | 3.961381635  | -1.521777388 | -2.132988008 |
|                                                                                                       | H            | -1.639161445 | -4.609262475 | -0.092903873 |
|                                                                                                       | H            | 0.639349774  | -4.723781688 | -1.008647307 |
|                                                                                                       | H            | 3.058771419  | 3.193907059  | -1.547559316 |
|                                                                                                       | C            | -2.984473219 | -2.371340844 | 0.557835791  |
|                                                                                                       | C            | -3.547685603 | -1.162466369 | 0.843913789  |
|                                                                                                       | C            | -2.845896855 | 0.043099179  | 0.615725104  |
|                                                                                                       | H            | -3.532046525 | -3.285699857 | 0.737388218  |
|                                                                                                       | H            | -4.546311857 | -1.106876915 | 1.252989556  |
|                                                                                                       | C            | -3.409406880 | 1.306267526  | 0.905601206  |
|                                                                                                       | C            | -2.708696834 | 2.458910068  | 0.675416117  |
|                                                                                                       | C            | -1.405871331 | 2.429931325  | 0.146792339  |
| H                                                                                                     | -4.409350060 | 1.345933193  | 1.312320119  |              |



|                                                                                                                                                                                          |              |              |              |              |
|------------------------------------------------------------------------------------------------------------------------------------------------------------------------------------------|--------------|--------------|--------------|--------------|
|                                                                                                                                                                                          | H            | -3.153118511 | 3.418516379  | 0.899525835  |
|                                                                                                                                                                                          | C            | 0.596119946  | 3.570995349  | -0.588234993 |
|                                                                                                                                                                                          | H            | 1.154280278  | 4.479595296  | -0.761285722 |
|                                                                                                                                                                                          | C            | -0.661267959 | 3.617118356  | -0.090311431 |
|                                                                                                                                                                                          | H            | -1.127641679 | 4.564521089  | 0.141296646  |
| 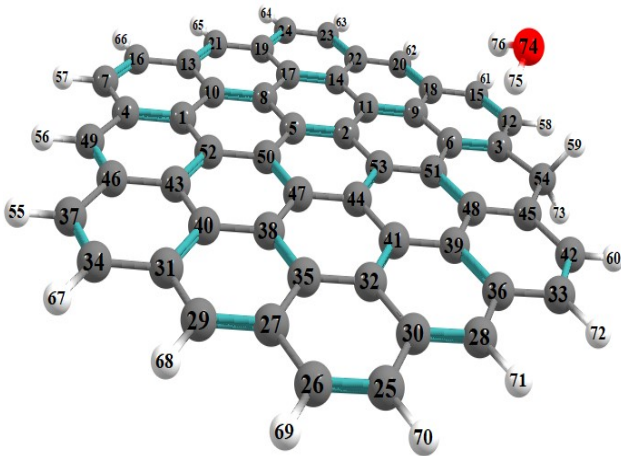 <p style="text-align: center;"><b>C1-DbcH<sup>+</sup>-W<sub>1</sub></b><br/><b>[-130.73921443]</b></p> | C            | -3.637483599 | 1.274531572  | 0.037647247  |
|                                                                                                                                                                                          | C            | 0.601251876  | 1.215480052  | -0.091107774 |
|                                                                                                                                                                                          | C            | 4.836178271  | 1.190401897  | -0.212769302 |
|                                                                                                                                                                                          | C            | -5.056006205 | 1.289720833  | 0.081306614  |
|                                                                                                                                                                                          | C            | -0.807115449 | 1.233631615  | -0.048596796 |
|                                                                                                                                                                                          | C            | 3.436157562  | 1.185363641  | -0.175710777 |
|                                                                                                                                                                                          | C            | -5.719739407 | 2.550448524  | 0.100226429  |
|                                                                                                                                                                                          | C            | -1.502126674 | 2.470655721  | -0.031101535 |
|                                                                                                                                                                                          | C            | 2.734062958  | 2.418693930  | -0.166058914 |
|                                                                                                                                                                                          | C            | -2.913248835 | 2.489269344  | 0.012761198  |
|                                                                                                                                                                                          | C            | 1.322312054  | 2.435112398  | -0.120213636 |
|                                                                                                                                                                                          | C            | 5.521461766  | 2.404524174  | -0.250627853 |
|                                                                                                                                                                                          | C            | -3.602970334 | 3.729771659  | 0.030696787  |
|                                                                                                                                                                                          | C            | 0.628854040  | 3.666274470  | -0.104734934 |
|                                                                                                                                                                                          | C            | 4.854973031  | 3.604804002  | -0.245311930 |
|                                                                                                                                                                                          | C            | -5.025978883 | 3.714401143  | 0.075840728  |
|                                                                                                                                                                                          | C            | -0.781967049 | 3.684054089  | -0.058886379 |
|                                                                                                                                                                                          | C            | 3.448811038  | 3.645403778  | -0.198861420 |
|                                                                                                                                                                                          | C            | -1.484340666 | 4.920988484  | -0.041848904 |
|                                                                                                                                                                                          | C            | 2.738760640  | 4.858118066  | -0.183072651 |
|                                                                                                                                                                                          | C            | -2.872780376 | 4.918228451  | 0.003065107  |
|                                                                                                                                                                                          | C            | 1.356547050  | 4.889974159  | -0.136005818 |
|                                                                                                                                                                                          | C            | 0.623347579  | 6.116813564  | -0.117748427 |
|                                                                                                                                                                                          | C            | -0.727533219 | 6.131139063  | -0.072483532 |
|                                                                                                                                                                                          | C            | 0.442773035  | -6.136066297 | -0.112977138 |
|                                                                                                                                                                                          | C            | -0.907957949 | -6.110551215 | -0.068137043 |
|                                                                                                                                                                                          | C            | -1.628764476 | -4.878594032 | -0.038340160 |
|                                                                                                                                                                                          | C            | 2.594413870  | -4.940290424 | -0.177820558 |
|                                                                                                                                                                                          | C            | -3.016526087 | -4.834885273 | 0.006356654  |
|                                                                                                                                                                                          | C            | 1.211834042  | -4.931383995 | -0.131557124 |
|                                                                                                                                                                                          | C            | -3.711379290 | -3.625406122 | 0.033155104  |
|                                                                                                                                                                                          | C            | 0.520525450  | -3.686744738 | -0.101406782 |
|                                                                                                                                                                                          | C            | 4.746663904  | -3.749968944 | -0.239407058 |
|                                                                                                                                                                                          | C            | -5.133320200 | -3.568070913 | 0.078144357  |
|                                                                                                                                                                                          | C            | -0.890223091 | -3.662910908 | -0.056003589 |
|                                                                                                                                                                                          | C            | 3.339903456  | -3.749047858 | -0.193917710 |
|                                                                                                                                                                                          | C            | -5.792480030 | -2.384162050 | 0.101734700  |
|                                                                                                                                                                                          | C            | -1.574327249 | -2.428803794 | -0.029195529 |
|                                                                                                                                                                                          | C            | 2.661629670  | -2.501818521 | -0.162585565 |
|                                                                                                                                                                                          | C            | -2.985390412 | -2.405787410 | 0.014480763  |
| C                                                                                                                                                                                        | 1.250000133  | -2.476581280 | -0.117513086 |              |
| C                                                                                                                                                                                        | 5.448227832  | -2.569899709 | -0.245657966 |              |
| C                                                                                                                                                                                        | -3.673518287 | -1.170216596 | 0.038485198  |              |
| C                                                                                                                                                                                        | 0.565141820  | -1.236220599 | -0.089784367 |              |
| C                                                                                                                                                                                        | 4.798994820  | -1.336072769 | -0.209812631 |              |
| C                                                                                                                                                                                        | -5.091872198 | -1.143560965 | 0.082073494  |              |
| C                                                                                                                                                                                        | -0.843152960 | -1.212816747 | -0.047529443 |              |
| C                                                                                                                                                                                        | 3.399765557  | -1.289752289 | -0.173302050 |              |
| C                                                                                                                                                                                        | -5.752775626 | 0.083095214  | 0.103313783  |              |
| C                                                                                                                                                                                        | -1.533040256 | 0.020849276  | -0.025147398 |              |
| C                                                                                                                                                                                        | 2.703865845  | -0.041655810 | -0.148745150 |              |

|                                                                                                        |              |              |              |              |
|--------------------------------------------------------------------------------------------------------|--------------|--------------|--------------|--------------|
|                                                                                                        | C            | -2.948229495 | 0.041725448  | 0.017417197  |
|                                                                                                        | C            | 1.299946398  | -0.020936792 | -0.109242193 |
|                                                                                                        | C            | 5.618320041  | -0.084584931 | -0.183827783 |
|                                                                                                        | H            | -6.872558548 | -2.357009054 | 0.135622923  |
|                                                                                                        | H            | -6.833544272 | 0.099038094  | 0.136714452  |
|                                                                                                        | H            | -6.800145064 | 2.555165897  | 0.134226085  |
|                                                                                                        | H            | 6.601900486  | 2.390367855  | -0.281138583 |
|                                                                                                        | H            | 6.229145820  | -0.092291065 | 0.729487373  |
|                                                                                                        | H            | 6.528648536  | -2.587613662 | -0.275511097 |
|                                                                                                        | H            | 5.403773577  | 4.534590016  | -0.274204159 |
|                                                                                                        | H            | 3.293652641  | 5.785584906  | -0.208048647 |
|                                                                                                        | H            | 1.184695985  | 7.040203082  | -0.141192650 |
|                                                                                                        | H            | -1.268606619 | 7.066868106  | -0.058942155 |
|                                                                                                        | H            | -3.402582825 | 5.861024653  | 0.016283206  |
|                                                                                                        | H            | -5.544064927 | 4.663069741  | 0.090025592  |
|                                                                                                        | H            | -5.679145080 | -4.501047630 | 0.092865653  |
|                                                                                                        | H            | -3.573890703 | -5.761647100 | 0.020106668  |
|                                                                                                        | H            | -1.476393309 | -7.029912388 | -0.054274849 |
|                                                                                                        | H            | 0.976651987  | -7.075622033 | -0.135762158 |
|                                                                                                        | H            | 3.121720635  | -5.883744049 | -0.201839939 |
|                                                                                                        | H            | 5.267851384  | -4.695564883 | -0.266791760 |
|                                                                                                        | H            | 6.327732438  | -0.096042934 | -1.020189779 |
|                                                                                                        | O            | 4.461230252  | -0.002126117 | 2.861808639  |
|                                                                                                        | H            | 3.991770043  | -0.750548618 | 2.485937566  |
|                                                                                                        | H            | 4.045654141  | 0.789233688  | 2.511519761  |
| <p style="text-align: center;"><b>C2-DbcH<sup>+</sup>-W<sub>1</sub></b><br/><b>[-130.73902091]</b></p> | C            | -3.684421134 | 1.293105852  | -0.000926144 |
|                                                                                                        | C            | 0.555725380  | 1.255781224  | -0.095435405 |
|                                                                                                        | C            | 4.791101297  | 1.252263405  | -0.173763731 |
|                                                                                                        | C            | -5.103270411 | 1.301026897  | 0.032301995  |
|                                                                                                        | C            | -0.853037188 | 1.266729512  | -0.065117819 |
|                                                                                                        | C            | 3.391314511  | 1.240055209  | -0.151018702 |
|                                                                                                        | C            | -5.773777884 | 2.558257560  | 0.035701288  |
|                                                                                                        | C            | -1.554860310 | 2.500060622  | -0.062461489 |
|                                                                                                        | C            | 2.682967768  | 2.469402317  | -0.155334316 |
|                                                                                                        | C            | -2.966390022 | 2.511478695  | -0.030135057 |
|                                                                                                        | C            | 1.270814641  | 2.478900838  | -0.125249772 |
|                                                                                                        | C            | 5.470751870  | 2.469984126  | -0.208080404 |
|                                                                                                        | C            | -3.662817213 | 3.748356678  | -0.027491434 |
|                                                                                                        | C            | 0.570523809  | 3.706307560  | -0.124804299 |
|                                                                                                        | C            | 4.798178093  | 3.666654987  | -0.215929154 |
|                                                                                                        | C            | -5.085988504 | 3.725675954  | 0.006765916  |
|                                                                                                        | C            | -0.840796988 | 3.717045932  | -0.092796248 |
|                                                                                                        | C            | 3.391307449  | 3.699748095  | -0.186981532 |
|                                                                                                        | C            | -1.549939683 | 4.950281023  | -0.091277046 |
|                                                                                                        | C            | 2.674806768  | 4.908746995  | -0.187337503 |
| C                                                                                                      | -2.938672366 | 4.940468049  | -0.058517680 |              |
| C                                                                                                      | 1.291955686  | 4.933735511  | -0.156439303 |              |
| C                                                                                                      | 0.552063349  | 6.156699838  | -0.154938828 |              |
| C                                                                                                      | -0.799286278 | 6.164246565  | -0.123794638 |              |
| C                                                                                                      | 0.435881203  | -6.096555440 | -0.062345780 |              |
| C                                                                                                      | -0.915208320 | -6.077861599 | -0.024870712 |              |
| C                                                                                                      | -1.642690586 | -4.849626646 | -0.010547926 |              |
| C                                                                                                      | 2.581333290  | -4.889966305 | -0.128734806 |              |
| C                                                                                                      | -3.030942649 | -4.812986706 | 0.024952070  |              |
| C                                                                                                      | 1.198547032  | -4.887993934 | -0.087950745 |              |
| C                                                                                                      | -3.732291562 | -3.607083438 | 0.036195764  |              |

|   |              |              |              |
|---|--------------|--------------|--------------|
| C | 0.500601770  | -3.646778503 | -0.071433229 |
| C | 4.727330553  | -3.688512056 | -0.195038022 |
| C | -5.154785103 | -3.556959874 | 0.070957251  |
| C | -0.910502630 | -3.630217357 | -0.034449838 |
| C | 3.320227278  | -3.694671695 | -0.151672102 |
| C | -5.820341474 | -2.376453683 | 0.079431775  |
| C | -1.601196120 | -2.399489639 | -0.022616850 |
| C | 2.635552092  | -2.450321622 | -0.130315027 |
| C | -3.012647997 | -2.383740606 | 0.011561272  |
| C | 1.223643889  | -2.432746896 | -0.092822175 |
| C | 5.422568012  | -2.503701287 | -0.206839881 |
| C | -3.707478682 | -1.151724545 | 0.020151956  |
| C | 0.532497191  | -1.195719326 | -0.078411185 |
| C | 4.765746403  | -1.272375459 | -0.176443645 |
| C | -5.126253181 | -1.132279956 | 0.053707740  |
| C | -0.876271702 | -1.179768674 | -0.046082481 |
| C | 3.366626079  | -1.233974360 | -0.143278692 |
| C | -5.793808663 | 0.090875109  | 0.059687592  |
| C | -1.572880885 | 0.050280716  | -0.038228506 |
| C | 2.665434704  | 0.010138891  | -0.126882973 |
| C | -2.988436115 | 0.063877911  | -0.006041954 |
| C | 1.261173989  | 0.023185759  | -0.099733476 |
| C | 5.578814977  | -0.017937820 | -0.142342718 |
| H | -6.900802164 | -2.354825305 | 0.105526096  |
| H | -6.874887043 | 0.101296190  | 0.085281736  |
| H | -6.854459905 | 2.557476429  | 0.061594550  |
| H | 6.551725966  | 2.461049788  | -0.225767197 |
| H | 6.184630878  | -0.030873036 | 0.774801528  |
| H | 6.503287780  | -2.514677984 | -0.236989512 |
| H | 5.342476837  | 4.599399042  | -0.241975142 |
| H | 3.224875622  | 5.839267609  | -0.211634575 |
| H | 1.108645454  | 7.083030477  | -0.179303695 |
| H | -1.345458347 | 7.097173073  | -0.122808188 |
| H | -3.473610457 | 5.880503344  | -0.057217429 |
| H | -5.609256214 | 4.671649323  | 0.009111691  |
| H | -5.695767766 | -4.492726892 | 0.090138114  |
| H | -3.583466764 | -5.742613577 | 0.043375253  |
| H | -1.478744054 | -7.000199404 | -0.005812940 |
| H | 0.974835851  | -7.033509769 | -0.074122012 |
| H | 3.113871611  | -5.830791093 | -0.144321041 |
| H | 5.253975721  | -4.631457997 | -0.218790035 |
| H | 6.294981220  | -0.023911133 | -0.972873351 |
| O | 5.933551596  | -1.332828645 | 2.838116862  |
| H | 5.600127062  | -2.064950030 | 2.312167487  |
| H | 5.220163181  | -1.055136344 | 3.415675646  |

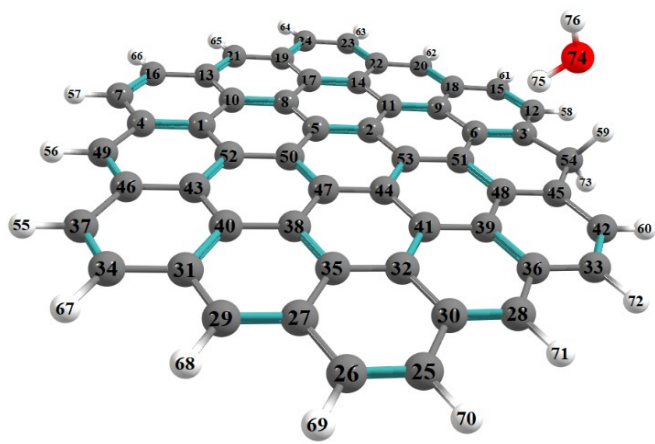

C3-DbcH<sup>+</sup>-W<sub>1</sub>

|   |              |             |              |
|---|--------------|-------------|--------------|
| C | -3.645371183 | 1.275135527 | 0.033766107  |
| C | 0.593797098  | 1.216779477 | -0.086388997 |
| C | 4.828996917  | 1.191882864 | -0.197945463 |
| C | -5.064003526 | 1.290057084 | 0.073831372  |
| C | -0.814711153 | 1.234676809 | -0.046659137 |
| C | 3.429116321  | 1.187307755 | -0.164132517 |
| C | -5.727921043 | 2.550693478 | 0.090270978  |
| C | -1.510071957 | 2.471584054 | -0.033087723 |
| C | 2.726490217  | 2.419982658 | -0.166155770 |
| C | -2.921280073 | 2.489984847 | 0.008736887  |
| C | 1.314773666  | 2.436397717 | -0.120239839 |

|   |              |              |              |
|---|--------------|--------------|--------------|
| C | 5.513631509  | 2.405622962  | -0.250771106 |
| C | -3.611254183 | 3.730399548  | 0.023529234  |
| C | 0.620764921  | 3.667346333  | -0.110550101 |
| C | 4.846803978  | 3.605562378  | -0.258049302 |
| C | -5.034284293 | 3.714747099  | 0.066355867  |
| C | -0.790047602 | 3.685043042  | -0.064012235 |
| C | 3.440787807  | 3.646450436  | -0.209139855 |
| C | -1.492795671 | 4.921856140  | -0.050670037 |
| C | 2.730333590  | 4.859008962  | -0.199478244 |
| C | -2.881214236 | 4.918924400  | -0.005796197 |
| C | 1.348211755  | 4.891009324  | -0.148769536 |
| C | 0.614628728  | 6.117676833  | -0.133771479 |
| C | -0.736177962 | 6.132010404  | -0.085848578 |
| C | 0.436142278  | -6.134444999 | -0.125981374 |
| C | -0.914489597 | -6.109369621 | -0.077510237 |
| C | -1.635524524 | -4.877649418 | -0.043644270 |
| C | 2.587579187  | -4.938023120 | -0.194010672 |
| C | -3.023258862 | -4.834219624 | 0.001563845  |
| C | 1.205136327  | -4.929688515 | -0.142715112 |
| C | -3.718373418 | -3.624898753 | 0.029139575  |
| C | 0.513656703  | -3.685314648 | -0.105738104 |
| C | 4.739631785  | -3.746832772 | -0.254726867 |
| C | -5.140349137 | -3.567747434 | 0.071756203  |
| C | -0.897057970 | -3.661848036 | -0.058851976 |
| C | 3.333046299  | -3.746692890 | -0.205173885 |
| C | -5.799793254 | -2.383954051 | 0.093841294  |
| C | -1.581429490 | -2.427893139 | -0.029507667 |
| C | 2.654799512  | -2.499894723 | -0.163189931 |
| C | -2.992570252 | -2.405125803 | 0.012434761  |
| C | 1.243216986  | -2.475115966 | -0.117060460 |
| C | 5.441163828  | -2.566837564 | -0.248638651 |
| C | -3.680975207 | -1.169669176 | 0.035641061  |
| C | 0.558086469  | -1.234969188 | -0.084685655 |
| C | 4.792231913  | -1.333590567 | -0.196522055 |
| C | -5.099440780 | -1.143209753 | 0.075687988  |
| C | -0.850343376 | -1.211782624 | -0.044882961 |
| C | 3.393045576  | -1.288193659 | -0.162509386 |
| C | -5.760627747 | 0.083325719  | 0.094695359  |
| C | -1.540528728 | 0.021774774  | -0.023158820 |
| C | 2.697224469  | -0.040011338 | -0.134122170 |
| C | -2.955808726 | 0.042416993  | 0.016078410  |
| C | 1.292850042  | -0.019547042 | -0.100388379 |
| C | 5.609281110  | -0.082442688 | -0.140738023 |
| H | -6.879992100 | -2.357018935 | 0.125414360  |
| H | -6.841527577 | 0.099093475  | 0.124877787  |
| H | -6.808454795 | 2.555277502  | 0.121580782  |
| H | 6.594099096  | 2.391450422  | -0.280254730 |
| H | 6.172897783  | -0.089889972 | 0.802594851  |
| H | 6.521578252  | -2.584206845 | -0.278516067 |
| H | 5.395211926  | 4.535422630  | -0.296565246 |
| H | 3.284699602  | 5.786699768  | -0.231315606 |
| H | 1.175646375  | 7.041223054  | -0.161816763 |
| H | -1.277445990 | 7.067730872  | -0.074564360 |
| H | -3.411264388 | 5.861668514  | 0.005017409  |
| H | -5.552638738 | 4.663356976  | 0.078375633  |
| H | -5.686095698 | -4.500842727 | 0.085553243  |

|                                                                                                                                                                                          |              |              |              |              |
|------------------------------------------------------------------------------------------------------------------------------------------------------------------------------------------|--------------|--------------|--------------|--------------|
|                                                                                                                                                                                          | H            | -3.580538760 | -5.761110605 | 0.013755125  |
|                                                                                                                                                                                          | H            | -1.482773262 | -7.028909879 | -0.064672639 |
|                                                                                                                                                                                          | H            | 0.970009333  | -7.073972801 | -0.152953038 |
|                                                                                                                                                                                          | H            | 3.114678374  | -5.881494996 | -0.225087786 |
|                                                                                                                                                                                          | H            | 5.260696967  | -4.692299929 | -0.292735997 |
|                                                                                                                                                                                          | H            | 6.357609979  | -0.093789511 | -0.941612801 |
|                                                                                                                                                                                          | O            | 4.752795443  | -0.044830301 | 2.917397815  |
|                                                                                                                                                                                          | H            | 4.031488942  | -0.069175429 | 2.283667855  |
|                                                                                                                                                                                          | H            | 4.359429004  | 0.023849497  | 3.789209589  |
| 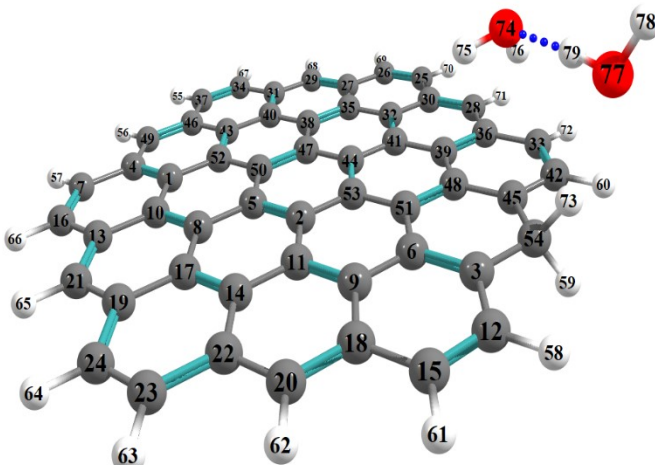 <p style="text-align: center;"><b>C1-DbcH<sup>+</sup>-W<sub>2</sub></b><br/><b>[-135.82296890]</b></p> | C            | -4.018823217 | 0.321040804  | -0.133266071 |
|                                                                                                                                                                                          | C            | 0.080714343  | 1.371338877  | 0.147322943  |
|                                                                                                                                                                                          | C            | 4.169439064  | 2.451452370  | 0.405933162  |
|                                                                                                                                                                                          | C            | -5.389414116 | -0.034797004 | -0.228326209 |
|                                                                                                                                                                                          | C            | -1.280927402 | 1.020903866  | 0.055125507  |
|                                                                                                                                                                                          | C            | 2.821013762  | 2.082761374  | 0.325432766  |
|                                                                                                                                                                                          | C            | -6.357158886 | 1.008877581  | -0.294216576 |
|                                                                                                                                                                                          | C            | -2.272964892 | 2.033468718  | -0.008961787 |
|                                                                                                                                                                                          | C            | 1.822733683  | 3.089329284  | 0.273684208  |
|                                                                                                                                                                                          | C            | -3.637367097 | 1.682867303  | -0.103972994 |
|                                                                                                                                                                                          | C            | 0.458123515  | 2.736866255  | 0.180413080  |
|                                                                                                                                                                                          | C            | 4.512849125  | 3.803224467  | 0.448059435  |
|                                                                                                                                                                                          | C            | -4.625072866 | 2.700235045  | -0.168444031 |
|                                                                                                                                                                                          | C            | -0.531204207 | 3.744005204  | 0.120717022  |
|                                                                                                                                                                                          | C            | 3.557445212  | 4.787613351  | 0.404659858  |
|                                                                                                                                                                                          | C            | -5.991912276 | 2.313714878  | -0.265258180 |
|                                                                                                                                                                                          | C            | -1.895148202 | 3.392863275  | 0.024278307  |
|                                                                                                                                                                                          | C            | 2.191443576  | 4.460021923  | 0.311627131  |
|                                                                                                                                                                                          | C            | -2.894355831 | 4.403483905  | -0.038484856 |
|                                                                                                                                                                                          | C            | 1.191095626  | 5.445212642  | 0.253820932  |
| C                                                                                                                                                                                        | -4.231201835 | 4.038264399  | -0.134151772 |              |
| C                                                                                                                                                                                        | -0.149105033 | 5.115337877  | 0.158179512  |              |
| C                                                                                                                                                                                        | -1.175426785 | 6.108128844  | 0.094713555  |              |
| C                                                                                                                                                                                        | -2.480631658 | 5.769372835  | 0.000388243  |              |
| C                                                                                                                                                                                        | 1.839607493  | -5.766396152 | 0.325302088  |              |
| C                                                                                                                                                                                        | 0.532018767  | -6.094530591 | 0.226332307  |              |
| C                                                                                                                                                                                        | -0.482625203 | -5.094004867 | 0.141502084  |              |
| C                                                                                                                                                                                        | 3.600705751  | -4.050357040 | 0.451817370  |              |
| C                                                                                                                                                                                        | -1.830851801 | -5.414321858 | 0.043378441  |              |
| C                                                                                                                                                                                        | 2.266861255  | -4.402779955 | 0.348003399  |              |
| C                                                                                                                                                                                        | -2.814667841 | -4.428395392 | -0.034775010 |              |
| C                                                                                                                                                                                        | 1.277509656  | -3.382261093 | 0.261488095  |              |
| C                                                                                                                                                                                        | 5.364926128  | -2.336658826 | 0.576937898  |              |
| C                                                                                                                                                                                        | -4.199486080 | -4.744396446 | -0.133186858 |              |
| C                                                                                                                                                                                        | -0.087460029 | -3.727696922 | 0.160693523  |              |
| C                                                                                                                                                                                        | 4.008743372  | -2.705572195 | 0.472372456  |              |
| C                                                                                                                                                                                        | -5.142494137 | -3.773727581 | -0.204678210 |              |
| C                                                                                                                                                                                        | -1.067219676 | -2.714969438 | 0.081498651  |              |
| C                                                                                                                                                                                        | 3.030977307  | -1.678013168 | 0.381246119  |              |
| C                                                                                                                                                                                        | -2.432603995 | -3.061375715 | -0.014697697 |              |
| C                                                                                                                                                                                        | 1.665004178  | -2.023315764 | 0.278600091  |              |
| C                                                                                                                                                                                        | 5.734119280  | -1.013132079 | 0.579781135  |              |
| C                                                                                                                                                                                        | -3.416993574 | -2.048396958 | -0.088751962 |              |
| C                                                                                                                                                                                        | 0.683595655  | -1.004427813 | 0.195390723  |              |
| C                                                                                                                                                                                        | 4.788385755  | 0.007962330  | 0.478159317  |              |
| C                                                                                                                                                                                        | -4.790512631 | -2.393081383 | -0.184143154 |              |
| C                                                                                                                                                                                        | -0.679290571 | -1.350126835 | 0.101024473  |              |

|  |   |              |              |              |
|--|---|--------------|--------------|--------------|
|  | C | 3.428052162  | -0.314455047 | 0.386260787  |
|  | C | -5.746534014 | -1.381688169 | -0.252896396 |
|  | C | -1.664820404 | -0.339479205 | 0.028604966  |
|  | C | 2.434398093  | 0.708055767  | 0.301333398  |
|  | C | -3.033707162 | -0.689037776 | -0.065152845 |
|  | C | 1.076027179  | 0.360511778  | 0.213847114  |
|  | C | 5.253290744  | 1.425084821  | 0.420656182  |
|  | H | -6.190144852 | -4.029665439 | -0.278373747 |
|  | H | -6.791981168 | -1.648568312 | -0.325528311 |
|  | H | -7.399320052 | 0.731321920  | -0.367565870 |
|  | H | 5.558245260  | 4.070525350  | 0.511424861  |
|  | H | 5.941076137  | 1.623962126  | 1.250217488  |
|  | H | 6.778249903  | -0.746193432 | 0.650843485  |
|  | H | 3.843384930  | 5.828859701  | 0.437490400  |
|  | H | 1.483477088  | 6.485717298  | 0.283603270  |
|  | H | -0.875558201 | 7.146237590  | 0.123960458  |
|  | H | -3.245872873 | 6.531443527  | -0.047421068 |
|  | H | -4.987409374 | 4.810031188  | -0.182439877 |
|  | H | -6.738268763 | 3.094180430  | -0.315111805 |
|  | H | -4.482617113 | -5.787585967 | -0.148886100 |
|  | H | -2.126705789 | -6.454527377 | 0.028693445  |
|  | H | 0.223855299  | -7.130545730 | 0.210510458  |
|  | H | 2.598060285  | -6.533759733 | 0.390538740  |
|  | H | 4.353715194  | -4.822929064 | 0.521360545  |
|  | H | 6.111695051  | -3.113205336 | 0.656163824  |
|  | H | 5.851998708  | 1.540199985  | -0.494753579 |
|  | O | 4.588747355  | -1.192247923 | -2.582750251 |
|  | H | 3.734041127  | -0.829375862 | -2.336670315 |
|  | H | 4.833160520  | -1.813790223 | -1.890418077 |
|  | O | 6.485512196  | 0.873682124  | -2.448343029 |
|  | H | 6.880762147  | 1.016425530  | -3.309539597 |
|  | H | 5.849788354  | 0.147371388  | -2.559827664 |
|  | C | -4.052739648 | 0.376616620  | -0.078600233 |
|  | C | 0.003768403  | 1.591378134  | 0.166780478  |
|  | C | 4.044616675  | 2.836543929  | 0.411636647  |
|  | C | -5.408734309 | -0.034320157 | -0.160713463 |
|  | C | -1.343527044 | 1.186389664  | 0.085232116  |
|  | C | 2.713318027  | 2.412070452  | 0.330440249  |
|  | C | -6.420724941 | 0.968671278  | -0.175129561 |
|  | C | -2.378248464 | 2.157288163  | 0.067653475  |
|  | C | 1.674001394  | 3.377702495  | 0.310786597  |
|  | C | -3.728323935 | 1.751891524  | -0.013685598 |
|  | C | 0.323906875  | 2.970344638  | 0.230016313  |
|  | C | 4.333074359  | 4.199695085  | 0.470783662  |
|  | C | -4.758988350 | 2.727787982  | -0.030327437 |
|  | C | -0.707539296 | 3.936129687  | 0.212159002  |
|  | C | 3.337424293  | 5.144961878  | 0.452476022  |
|  | C | -6.110139216 | 2.286390474  | -0.112853686 |
|  | C | -2.057246926 | 3.530144095  | 0.131490903  |
|  | C | 1.985607594  | 4.761719856  | 0.372949509  |
|  | C | -3.098931038 | 4.498807363  | 0.113836710  |
|  | C | 0.944106183  | 5.705260251  | 0.353904811  |
|  | C | -4.421033210 | 4.079842062  | 0.033955830  |
|  | C | -0.382611977 | 5.321198476  | 0.275805361  |
|  | C | -1.450609889 | 6.271002567  | 0.256323000  |
|  | C | -2.742155139 | 5.879598004  | 0.179457559  |

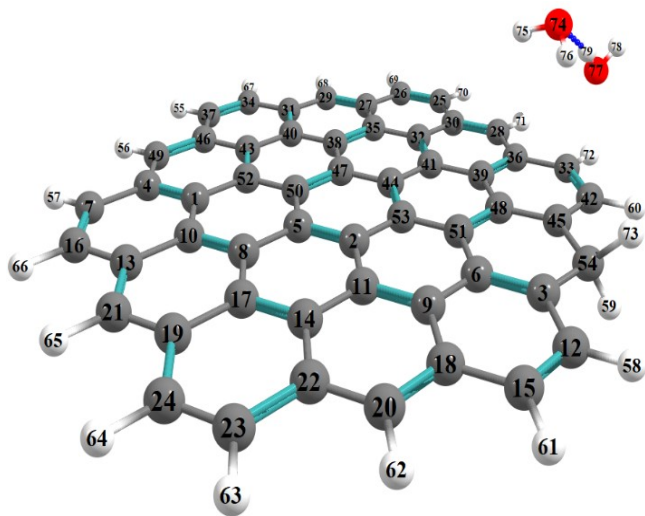

**C2-DbcH<sup>+</sup>-W<sub>2</sub>**  
**[-135.82039139]**

|  |   |              |              |              |
|--|---|--------------|--------------|--------------|
|  | C | 2.068221871  | -5.465697016 | 0.022145297  |
|  | C | 0.773669011  | -5.845961129 | -0.059982448 |
|  | C | -0.284815522 | -4.887604039 | -0.078750356 |
|  | C | 3.757634246  | -3.682287943 | 0.181614188  |
|  | C | -1.620129819 | -5.261883271 | -0.160005753 |
|  | C | 2.436833610  | -4.086266245 | 0.094767298  |
|  | C | -2.646657765 | -4.317144152 | -0.177061882 |
|  | C | 1.402650388  | -3.106553298 | 0.073958473  |
|  | C | 5.449131004  | -1.904691690 | 0.320319606  |
|  | C | -4.018642688 | -4.688803982 | -0.258955355 |
|  | C | 0.051640925  | -3.507038105 | -0.011138050 |
|  | C | 4.105041314  | -2.320277683 | 0.245605282  |
|  | C | -5.003382565 | -3.757779191 | -0.274358309 |
|  | C | -0.971739084 | -2.535368040 | -0.028328991 |
|  | C | 3.084098167  | -1.333797674 | 0.223899751  |
|  | C | -2.322861044 | -2.936672995 | -0.110930823 |
|  | C | 1.731979097  | -1.733746878 | 0.139873780  |
|  | C | 5.761036086  | -0.568042396 | 0.377196756  |
|  | C | -3.350647224 | -1.965012382 | -0.127363686 |
|  | C | 0.706615646  | -0.756310271 | 0.120775342  |
|  | C | 4.770271216  | 0.414487322  | 0.364841839  |
|  | C | -4.709900689 | -2.364928469 | -0.209548035 |
|  | C | -0.641724553 | -1.156781729 | 0.037837567  |
|  | C | 3.422954747  | 0.042645652  | 0.286194879  |
|  | C | -5.709081214 | -1.393637721 | -0.224372975 |
|  | C | -1.670417077 | -0.187465077 | 0.020380587  |
|  | C | 2.385227842  | 1.023617180  | 0.267294684  |
|  | C | -3.024806974 | -0.592057128 | -0.061878930 |
|  | C | 1.041697717  | 0.622292413  | 0.185689658  |
|  | C | 5.173979114  | 1.854072359  | 0.439341320  |
|  | H | -6.040561510 | -4.055898504 | -0.336638981 |
|  | H | -6.743562156 | -1.702533590 | -0.286877612 |
|  | H | -7.451553988 | 0.649285988  | -0.237524445 |
|  | H | 5.367026575  | 4.510595357  | 0.532904173  |
|  | H | 5.757462842  | 2.010603545  | 1.356496833  |
|  | H | 6.796264767  | -0.261521258 | 0.436638747  |
|  | H | 3.581308597  | 6.196242785  | 0.499593070  |
|  | H | 1.193516291  | 6.756197747  | 0.402129932  |
|  | H | -1.193842435 | 7.319862665  | 0.305359254  |
|  | H | -3.539426844 | 6.609528544  | 0.165799605  |
|  | H | -5.209689859 | 4.819880611  | 0.021019513  |
|  | H | -6.889452311 | 3.035508281  | -0.124753478 |
|  | H | -4.257588494 | -5.741920555 | -0.308735254 |
|  | H | -1.871818082 | -6.312503504 | -0.210657899 |
|  | H | 0.509102079  | -6.892682773 | -0.112641733 |
|  | H | 2.862104597  | -6.198607230 | 0.036881549  |
|  | H | 4.549596215  | -4.416876911 | 0.198051582  |
|  | H | 6.223294992  | -2.656981461 | 0.329964934  |
|  | H | 5.860026259  | 2.076048114  | -0.389001736 |
|  | O | 5.068760484  | -3.223339523 | -2.711911941 |
|  | H | 4.198085352  | -3.555740676 | -2.476824937 |
|  | H | 5.173772668  | -2.383514822 | -2.255390846 |
|  | O | 6.695767937  | -4.818855981 | -1.059488531 |
|  | H | 7.354615401  | -5.330081261 | -1.530942925 |
|  | H | 6.208011069  | -4.314826805 | -1.731349887 |
|  | C | -3.817492998 | 0.313600447  | -0.131754312 |

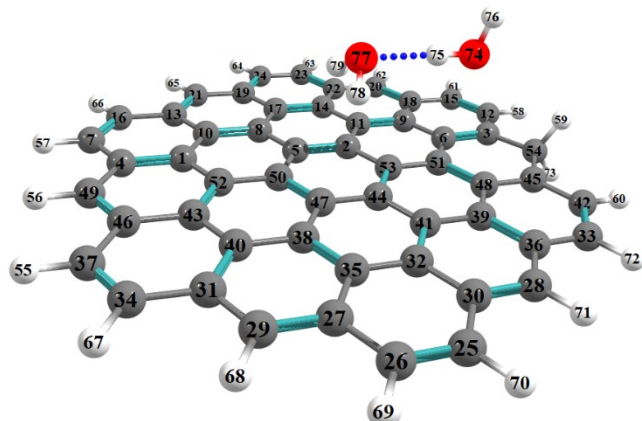

**C3-DbcH<sup>+</sup>-W<sub>2</sub>**  
**[-135.82035367]**

|   |              |              |              |
|---|--------------|--------------|--------------|
| C | 0.300856207  | 1.335780263  | -0.175900499 |
| C | 4.400697622  | 2.388026557  | -0.147040851 |
| C | -5.193620801 | -0.032854251 | -0.115838109 |
| C | -1.067974944 | 0.994913307  | -0.163392393 |
| C | 3.049428180  | 2.026551191  | -0.167462243 |
| C | -6.156247772 | 1.017526967  | -0.115510017 |
| C | -2.055799447 | 2.014325796  | -0.163360807 |
| C | 2.058283545  | 3.040649340  | -0.187939956 |
| C | -3.425716504 | 1.672638942  | -0.147699202 |
| C | 0.688018972  | 2.698979245  | -0.186855932 |
| C | 4.756165823  | 3.736617623  | -0.165418152 |
| C | -4.408402087 | 2.696850326  | -0.149252686 |
| C | -0.296951142 | 3.712343112  | -0.192070570 |
| C | 3.807414566  | 4.728447640  | -0.195593220 |
| C | -5.781031128 | 2.319722000  | -0.131936314 |
| C | -1.666817217 | 3.371005493  | -0.179995688 |
| C | 2.436893648  | 4.409098335  | -0.200871584 |
| C | -2.661375712 | 4.388211761  | -0.184237779 |
| C | 1.441482705  | 5.401269904  | -0.214947381 |
| C | -4.003838486 | 4.031905944  | -0.168374192 |
| C | 0.095757599  | 5.081115088  | -0.208853605 |
| C | -0.925929486 | 6.080631684  | -0.216841921 |
| C | -2.236800193 | 5.751050762  | -0.204699196 |
| C | 2.016742108  | -5.814536154 | -0.163360288 |
| C | 0.703375411  | -6.134034474 | -0.151501815 |
| C | -0.307663540 | -5.126206041 | -0.141837657 |
| C | 3.794359394  | -4.109798105 | -0.172143290 |
| C | -1.661447261 | -5.436774444 | -0.126638251 |
| C | 2.454566179  | -4.453930618 | -0.165898688 |
| C | -2.641823058 | -4.444205497 | -0.118039865 |
| C | 1.468955551  | -3.426032981 | -0.159833275 |
| C | 5.573684194  | -2.411363455 | -0.163720865 |
| C | -4.032006691 | -4.750402754 | -0.101518725 |
| C | 0.097922813  | -3.762633802 | -0.148000468 |
| C | 4.212357080  | -2.767889786 | -0.168565389 |
| C | -4.971100193 | -3.773248619 | -0.095111598 |
| C | -0.878735994 | -2.743693650 | -0.142041842 |
| C | 3.239368426  | -1.733730436 | -0.166228844 |
| C | -2.249985748 | -3.079992992 | -0.126760973 |
| C | 1.867840410  | -2.070324386 | -0.165101544 |
| C | 5.950536864  | -1.091370624 | -0.143932079 |
| C | -3.230232750 | -2.060282433 | -0.121376574 |
| C | 0.889759203  | -1.044800740 | -0.164877582 |
| C | 5.007291842  | -0.063930298 | -0.135997455 |
| C | -4.609204659 | -2.395251846 | -0.105701565 |
| C | -0.480127694 | -1.381355129 | -0.152553022 |
| C | 3.643361068  | -0.374331824 | -0.156479187 |
| C | -5.560601967 | -1.377089349 | -0.102333851 |
| C | -1.462910003 | -0.363599709 | -0.149602489 |
| C | 2.655498324  | 0.655186819  | -0.165049635 |
| C | -2.837236446 | -0.703512655 | -0.133751697 |
| C | 1.292907278  | 0.318052387  | -0.172816111 |
| C | 5.478280495  | 1.353872130  | -0.081392753 |
| H | -6.022978560 | -4.021857462 | -0.082714853 |
| H | -6.610246357 | -1.636699962 | -0.090331077 |
| H | -7.202735397 | 0.747146566  | -0.102667187 |



|                                                                                                                                                                                           |              |              |              |              |
|-------------------------------------------------------------------------------------------------------------------------------------------------------------------------------------------|--------------|--------------|--------------|--------------|
|                                                                                                                                                                                           | H            | 5.805272944  | 3.999102668  | -0.151774549 |
|                                                                                                                                                                                           | H            | 6.030837176  | 1.494837790  | 0.857197656  |
|                                                                                                                                                                                           | H            | 7.000995293  | -0.834340949 | -0.130558618 |
|                                                                                                                                                                                           | H            | 4.102404870  | 5.767689030  | -0.208759986 |
|                                                                                                                                                                                           | H            | 1.742017460  | 6.439826705  | -0.227040680 |
|                                                                                                                                                                                           | H            | -0.617807915 | 7.116583271  | -0.232046291 |
|                                                                                                                                                                                           | H            | -2.998461773 | 6.518107868  | -0.210105533 |
|                                                                                                                                                                                           | H            | -4.756311888 | 4.808715216  | -0.171209639 |
|                                                                                                                                                                                           | H            | -6.523562590 | 3.105347216  | -0.132527008 |
|                                                                                                                                                                                           | H            | -4.322622522 | -5.791582347 | -0.094443574 |
|                                                                                                                                                                                           | H            | -1.964960120 | -6.474809145 | -0.121621083 |
|                                                                                                                                                                                           | H            | 0.387198056  | -7.167747377 | -0.148876282 |
|                                                                                                                                                                                           | H            | 2.772350246  | -6.587437192 | -0.170280946 |
|                                                                                                                                                                                           | H            | 4.544466193  | -4.888506973 | -0.176151793 |
|                                                                                                                                                                                           | H            | 6.319200001  | -3.193275879 | -0.168978380 |
|                                                                                                                                                                                           | H            | 6.203245615  | 1.529586546  | -0.886328568 |
|                                                                                                                                                                                           | O            | 3.045078882  | 0.789003305  | 2.863317437  |
|                                                                                                                                                                                           | H            | 2.104501499  | 0.553358488  | 2.889624708  |
|                                                                                                                                                                                           | H            | 3.320389111  | 0.864483541  | 3.778467492  |
|                                                                                                                                                                                           | O            | 0.298390620  | 0.101641381  | 2.873789897  |
|                                                                                                                                                                                           | H            | 0.212255141  | -0.716352005 | 2.376281453  |
|                                                                                                                                                                                           | H            | -0.164054513 | 0.779913054  | 2.373622305  |
| 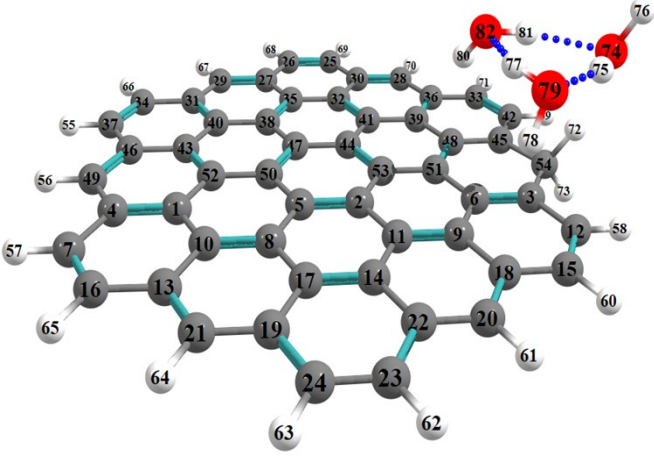 <p style="text-align: center;"><b>C1-DbcH<sup>+</sup>·W<sub>3</sub></b><br/><b>[-140.90963177]</b></p> | C            | 3.621078692  | 1.851192064  | 0.099906554  |
|                                                                                                                                                                                           | C            | -0.530981884 | 1.076474756  | -0.279635833 |
|                                                                                                                                                                                           | C            | -4.684942527 | 0.335216201  | -0.655918911 |
|                                                                                                                                                                                           | C            | 5.011525899  | 2.105884821  | 0.226766384  |
|                                                                                                                                                                                           | C            | 0.848698944  | 1.332526205  | -0.152845516 |
|                                                                                                                                                                                           | C            | -3.309373014 | 0.567126658  | -0.535436784 |
|                                                                                                                                                                                           | C            | 5.451222653  | 3.460680331  | 0.266382518  |
|                                                                                                                                                                                           | C            | 1.323105992  | 2.669222120  | -0.112076368 |
|                                                                                                                                                                                           | C            | -2.826413578 | 1.901545255  | -0.502235691 |
|                                                                                                                                                                                           | C            | 2.705637195  | 2.926096928  | 0.014733717  |
|                                                                                                                                                                                           | C            | -1.443382903 | 2.156751181  | -0.369979839 |
|                                                                                                                                                                                           | C            | -5.561675357 | 1.415856129  | -0.755542309 |
|                                                                                                                                                                                           | C            | 3.174345809  | 4.265338977  | 0.055158134  |
|                                                                                                                                                                                           | C            | -0.969957416 | 3.487563402  | -0.329903157 |
|                                                                                                                                                                                           | C            | -5.109275571 | 2.711972379  | -0.729115507 |
|                                                                                                                                                                                           | C            | 4.574265129  | 4.490674012  | 0.184273896  |
|                                                                                                                                                                                           | C            | 0.412201318  | 3.743528212  | -0.200185945 |
|                                                                                                                                                                                           | C            | -3.734860923 | 2.990616880  | -0.596935418 |
|                                                                                                                                                                                           | C            | 0.893860243  | 5.081341065  | -0.159788796 |
|                                                                                                                                                                                           | C            | -3.241559593 | 4.306073261  | -0.553762365 |
| C                                                                                                                                                                                         | 2.257640165  | 5.313313998  | -0.032944178 |              |
| C                                                                                                                                                                                         | -1.889986014 | 4.570636949  | -0.422793008 |              |
| C                                                                                                                                                                                         | -1.376482733 | 5.903740962  | -0.378415404 |              |
| C                                                                                                                                                                                         | -0.052602940 | 6.146060629  | -0.253085129 |              |
| C                                                                                                                                                                                         | 0.862498486  | -6.142492658 | -0.181235746 |              |
| C                                                                                                                                                                                         | 2.184478656  | -5.889073227 | -0.057621150 |              |
| C                                                                                                                                                                                         | 2.684653403  | -4.553004188 | -0.003739813 |              |
| C                                                                                                                                                                                         | -1.451781764 | -5.327649206 | -0.389213914 |              |
| C                                                                                                                                                                                         | 4.039977696  | -4.275433184 | 0.122052986  |              |
| C                                                                                                                                                                                         | -0.095696536 | -5.085055923 | -0.262847701 |              |
| C                                                                                                                                                                                         | 4.518501104  | -2.965875918 | 0.171858801  |              |
| C                                                                                                                                                                                         | 0.373432694  | -3.741511503 | -0.211159637 |              |
| C                                                                                                                                                                                         | -3.766316205 | -4.517679450 | -0.592214185 |              |
| C                                                                                                                                                                                         | 5.905138118  | -2.669080480 | 0.299732463  |              |

|  |   |              |              |              |
|--|---|--------------|--------------|--------------|
|  | C | 1.754620800  | -3.479568882 | -0.083011609 |
|  | C | -2.384632049 | -4.279547059 | -0.466889210 |
|  | C | 6.353068181  | -1.390776790 | 0.344558726  |
|  | C | 2.218372623  | -2.147566205 | -0.034131984 |
|  | C | -1.928498735 | -2.935680657 | -0.416606148 |
|  | C | 3.600157596  | -1.886449673 | 0.092373969  |
|  | C | -0.546630807 | -2.671911425 | -0.288848038 |
|  | C | -4.654836548 | -3.473142147 | -0.656879630 |
|  | C | 4.067871878  | -0.552338514 | 0.138670608  |
|  | C | -0.083357493 | -1.333553611 | -0.239316441 |
|  | C | -4.225868687 | -2.146798237 | -0.605108721 |
|  | C | 5.456222195  | -0.286375930 | 0.265321329  |
|  | C | 1.295592705  | -1.072594578 | -0.113690017 |
|  | C | -2.858209467 | -1.865486755 | -0.490241398 |
|  | C | 5.898793600  | 1.034360440  | 0.307366698  |
|  | C | 1.765432068  | 0.259867020  | -0.068661053 |
|  | C | -2.384369493 | -0.517332824 | -0.445573261 |
|  | C | 3.151634422  | 0.519620955  | 0.057127012  |
|  | C | -1.009272892 | -0.259891461 | -0.321586421 |
|  | C | -5.242024162 | -1.051475733 | -0.645137562 |
|  | H | 7.409116862  | -1.181528592 | 0.441723136  |
|  | H | 6.957434438  | 1.232711533  | 0.404146249  |
|  | H | 6.511350920  | 3.647932496  | 0.363969850  |
|  | H | -6.619694887 | 1.218100644  | -0.848908113 |
|  | H | -5.713350171 | -3.672437796 | -0.746783144 |
|  | H | -5.803331730 | 3.535535259  | -0.806482528 |
|  | H | -3.942158981 | 5.125986588  | -0.626094512 |
|  | H | -2.082841514 | 6.718798299  | -0.448722138 |
|  | H | 0.321272816  | 7.159803921  | -0.221145072 |
|  | H | 2.619407869  | 6.332086387  | -0.002300498 |
|  | H | 4.923512467  | 5.513247835  | 0.215260903  |
|  | H | 6.598253165  | -3.496421951 | 0.360548979  |
|  | H | 4.743445075  | -5.094713194 | 0.182515031  |
|  | H | 2.897545453  | -6.699232617 | 0.003382534  |
|  | H | 0.496670191  | -7.158813099 | -0.221152868 |
|  | H | -1.810497645 | -6.346679450 | -0.429030339 |
|  | H | -4.118494209 | -5.537830606 | -0.634189909 |
|  | H | -5.891609638 | -1.146916410 | 0.235909623  |
|  | H | -5.896430869 | -1.190924701 | -1.513466392 |
|  | O | -6.211983643 | -0.549168701 | 2.368102505  |
|  | H | -5.787963210 | 0.332081472  | 2.371105486  |
|  | H | -6.717711044 | -0.599115184 | 3.180861741  |
|  | H | -3.852287674 | 0.832672863  | 2.727493224  |
|  | H | -4.132816001 | 2.022724166  | 1.775257746  |
|  | O | -4.473528074 | 1.558810294  | 2.543092816  |
|  | H | -3.020273819 | -1.469013708 | 1.931881828  |
|  | H | -4.406163378 | -1.174933973 | 2.556422056  |
|  | O | -3.452418103 | -1.020069921 | 2.661813234  |
|  | C | 3.547465527  | 1.879513264  | 0.139991982  |
|  | C | -0.603380883 | 1.140471994  | -0.314211901 |
|  | C | -4.762906939 | 0.434385372  | -0.699055058 |
|  | C | 4.937015684  | 2.122274371  | 0.296348617  |
|  | C | 0.776234555  | 1.384564963  | -0.166085549 |
|  | C | -3.384446905 | 0.654715191  | -0.590078224 |
|  | C | 5.389363855  | 3.473151794  | 0.325944862  |
|  | C | 1.263465516  | 2.716875732  | -0.138047068 |

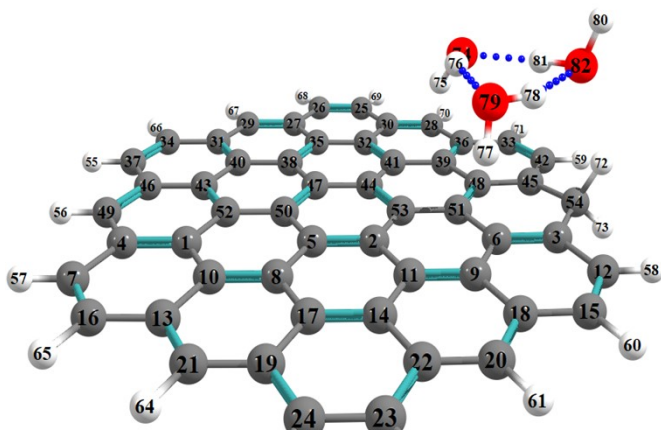

|   |              |              |              |
|---|--------------|--------------|--------------|
| C | -2.886867767 | 1.984716118  | -0.588542514 |
| C | 2.645340173  | 2.961908718  | 0.016086277  |
| C | -1.502499183 | 2.228124390  | -0.442337613 |
| C | -5.625588710 | 1.521529707  | -0.837429775 |
| C | 3.126853340  | 4.296890966  | 0.044507880  |
| C | -1.015568790 | 3.554306079  | -0.420932813 |
| C | -5.157425772 | 2.812405149  | -0.853217145 |
| C | 4.525413835  | 4.510298651  | 0.204787939  |
| C | 0.366132276  | 3.798448611  | -0.266692066 |
| C | -3.782077172 | 3.080151655  | -0.718171208 |
| C | 0.860929469  | 5.131796361  | -0.241204314 |
| C | -3.274452830 | 4.390591783  | -0.701436878 |
| C | 2.223653717  | 5.352242749  | -0.085636216 |
| C | -1.922381131 | 4.644207892  | -0.554147600 |
| C | -1.395201034 | 5.972488747  | -0.528274618 |
| C | -0.071848899 | 6.203821322  | -0.378482796 |
| C | 0.722433049  | -6.090010569 | -0.166413921 |
| C | 2.042877059  | -5.848130576 | -0.007839617 |
| C | 2.553546358  | -4.516634741 | 0.059715894  |
| C | -1.579624282 | -5.254615027 | -0.427542972 |
| C | 3.907464627  | -4.250624980 | 0.220533424  |
| C | -0.224547330 | -5.024432813 | -0.269706938 |
| C | 4.396380252  | -2.945192317 | 0.278632277  |
| C | 0.255545677  | -3.685373831 | -0.204629999 |
| C | -3.884373992 | -4.423436666 | -0.662220073 |
| C | 5.781845527  | -2.660163434 | 0.441070884  |
| C | 1.635418342  | -3.435104678 | -0.043612004 |
| C | -2.502633558 | -4.198755014 | -0.517202993 |
| C | 6.240482370  | -1.385705908 | 0.488022434  |
| C | 2.109771849  | -2.107115833 | 0.013077297  |
| C | -2.036320389 | -2.859036501 | -0.452217672 |
| C | 3.490470712  | -1.857798969 | 0.170781826  |
| C | -0.653566362 | -2.607762685 | -0.300299640 |
| C | -4.764307240 | -3.370807780 | -0.712773658 |
| C | 3.969390669  | -0.527702214 | 0.218257302  |
| C | -0.179510047 | -1.272898638 | -0.241727220 |
| C | -4.325495317 | -2.049469131 | -0.634735040 |
| C | 5.356773315  | -0.273601198 | 0.375747452  |
| C | 1.199138037  | -1.023991257 | -0.091593515 |
| C | -2.956602246 | -1.780516034 | -0.522470824 |
| C | 5.811148114  | 1.043284861  | 0.413322986  |
| C | 1.680330410  | 0.304398671  | -0.048394761 |
| C | -2.471537817 | -0.437844390 | -0.476498824 |
| C | 3.065918571  | 0.552104251  | 0.104266640  |
| C | -1.094900650 | -0.191481807 | -0.344028669 |
| C | -5.330720209 | -0.944540251 | -0.609910667 |
| H | 7.295583933  | -1.185573795 | 0.611128014  |
| H | 6.869022666  | 1.232592877  | 0.533623836  |
| H | 6.448598410  | 3.651521696  | 0.447022983  |
| H | -6.686361075 | 1.334707826  | -0.927553052 |
| H | -5.824104317 | -3.561523989 | -0.806611565 |
| H | -5.841934971 | 3.640778336  | -0.961246990 |
| H | -3.964620518 | 5.216327627  | -0.803060135 |
| H | -2.090890604 | 6.793261520  | -0.631358406 |
| H | 0.312007508  | 7.214169074  | -0.359418793 |
| H | 2.595384920  | 6.367687194  | -0.065356002 |

|                                                                                                                                                                                           |              |              |              |              |
|-------------------------------------------------------------------------------------------------------------------------------------------------------------------------------------------|--------------|--------------|--------------|--------------|
|                                                                                                                                                                                           | H            | 4.884433161  | 5.529700730  | 0.227526370  |
|                                                                                                                                                                                           | H            | 6.465330604  | -3.493349628 | 0.526085729  |
|                                                                                                                                                                                           | H            | 4.601775214  | -5.075929071 | 0.301095028  |
|                                                                                                                                                                                           | H            | 2.746950623  | -6.664566709 | 0.070843063  |
|                                                                                                                                                                                           | H            | 0.349049288  | -7.103026648 | -0.217224610 |
|                                                                                                                                                                                           | H            | -1.945542763 | -6.270460538 | -0.478772998 |
|                                                                                                                                                                                           | H            | -4.244140569 | -5.440062931 | -0.721840906 |
|                                                                                                                                                                                           | H            | -5.869134529 | -1.016612724 | 0.346406386  |
|                                                                                                                                                                                           | H            | -6.078880434 | -1.096072209 | -1.394953419 |
|                                                                                                                                                                                           | O            | -2.594851530 | -1.860109498 | 2.709811077  |
|                                                                                                                                                                                           | H            | -2.043509904 | -2.130473837 | 1.972499514  |
|                                                                                                                                                                                           | H            | -2.483970235 | -0.897864393 | 2.803597913  |
|                                                                                                                                                                                           | H            | -3.109194679 | 1.414449786  | 1.845700074  |
|                                                                                                                                                                                           | H            | -4.072878093 | 0.434898247  | 2.560548631  |
|                                                                                                                                                                                           | O            | -3.196211068 | 0.852078630  | 2.618339812  |
|                                                                                                                                                                                           | H            | -5.584456495 | -1.227123254 | 3.457501168  |
|                                                                                                                                                                                           | H            | -4.385451782 | -1.590638286 | 2.558550872  |
|                                                                                                                                                                                           | O            | -5.225450327 | -1.092253225 | 2.578744953  |
| 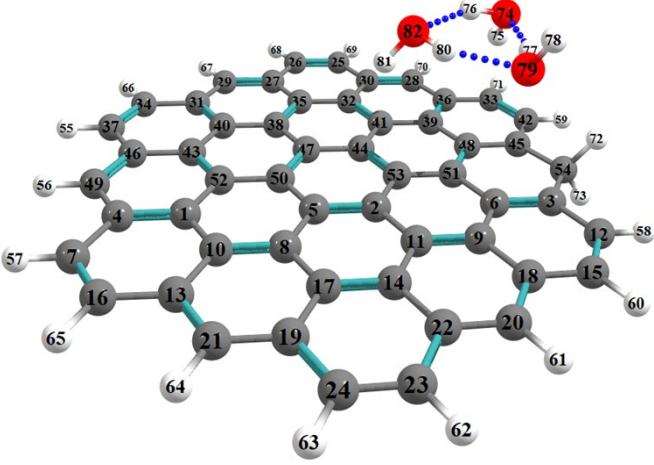 <p style="text-align: center;"><b>C3-DbcH<sup>+</sup>-W<sub>3</sub></b><br/><b>[-140.90819894]</b></p> | C            | 3.533445438  | 1.892407188  | 0.125462988  |
|                                                                                                                                                                                           | C            | -0.627173428 | 1.207179727  | -0.335487364 |
|                                                                                                                                                                                           | C            | -4.786742716 | 0.555907093  | -0.789224955 |
|                                                                                                                                                                                           | C            | 4.926413835  | 2.117269424  | 0.277673794  |
|                                                                                                                                                                                           | C            | 0.755162193  | 1.433182472  | -0.180630776 |
|                                                                                                                                                                                           | C            | -3.410219615 | 0.757304899  | -0.643527779 |
|                                                                                                                                                                                           | C            | 5.396952181  | 3.461935004  | 0.301002537  |
|                                                                                                                                                                                           | C            | 1.260000523  | 2.759057071  | -0.151042711 |
|                                                                                                                                                                                           | C            | -2.898924448 | 2.079557575  | -0.613357721 |
|                                                                                                                                                                                           | C            | 2.645166279  | 2.986168347  | 0.001211134  |
|                                                                                                                                                                                           | C            | -1.513411591 | 2.305789515  | -0.459327947 |
|                                                                                                                                                                                           | C            | -5.637463452 | 1.654390283  | -0.908407673 |
|                                                                                                                                                                                           | C            | 3.144097061  | 4.314712295  | 0.029111463  |
|                                                                                                                                                                                           | C            | -1.009120801 | 3.625398644  | -0.428235734 |
|                                                                                                                                                                                           | C            | -5.156248130 | 2.939778391  | -0.884855817 |
|                                                                                                                                                                                           | C            | 4.545971681  | 4.510095426  | 0.182688489  |
|                                                                                                                                                                                           | C            | 0.375813599  | 3.852025026  | -0.274779588 |
|                                                                                                                                                                                           | C            | -3.778972098 | 3.187074799  | -0.735474819 |
|                                                                                                                                                                                           | C            | 0.887705147  | 5.178998673  | -0.244341116 |
|                                                                                                                                                                                           | C            | -3.256518481 | 4.491318876  | -0.702917186 |
|                                                                                                                                                                                           | C            | 2.253686706  | 5.381755549  | -0.093891892 |
|                                                                                                                                                                                           | C            | -1.901758445 | 4.727922628  | -0.553128038 |
|                                                                                                                                                                                           | C            | -1.358326083 | 6.049472783  | -0.518337000 |
|                                                                                                                                                                                           | C            | -0.031796192 | 6.263739714  | -0.371419570 |
|                                                                                                                                                                                           | C            | 0.590275882  | -6.038980373 | -0.023275011 |
|                                                                                                                                                                                           | C            | 1.914906947  | -5.813456130 | 0.123586508  |
|                                                                                                                                                                                           | C            | 2.446121048  | -4.488783071 | 0.151167714  |
|                                                                                                                                                                                           | C            | -1.697461673 | -5.175493956 | -0.310171865 |
|                                                                                                                                                                                           | C            | 3.804621679  | -4.240007135 | 0.300746619  |
|                                                                                                                                                                                           | C            | -0.339201772 | -4.961894143 | -0.158770553 |
| C                                                                                                                                                                                         | 4.313690094  | -2.941486404 | 0.326692260  |              |
| C                                                                                                                                                                                         | 0.161105615  | -3.629008920 | -0.135471305 |              |
| C                                                                                                                                                                                         | -3.986136860 | -4.317464711 | -0.596403160 |              |
| C                                                                                                                                                                                         | 5.703962768  | -2.674353744 | 0.478224529  |              |
| C                                                                                                                                                                                         | 1.544767059  | -3.396265238 | 0.019842175  |              |
| C                                                                                                                                                                                         | -2.601662648 | -4.107795818 | -0.443466388 |              |
| C                                                                                                                                                                                         | 6.181428724  | -1.406270785 | 0.501449688  |              |
| C                                                                                                                                                                                         | 2.039719040  | -2.074838043 | 0.044835636  |              |

|   |              |              |              |
|---|--------------|--------------|--------------|
| C | -2.115387084 | -2.772827807 | -0.421389016 |
| C | 3.423915893  | -1.843008368 | 0.198432139  |
| C | -0.730459375 | -2.540797213 | -0.267997456 |
| C | -4.846149786 | -3.252455922 | -0.718077409 |
| C | 3.922123776  | -0.519540614 | 0.224035013  |
| C | -0.236321823 | -1.211777721 | -0.241185640 |
| C | -4.385067520 | -1.936005337 | -0.693718836 |
| C | 5.313310834  | -0.283281621 | 0.376293781  |
| C | 1.145652018  | -0.980393824 | -0.084490608 |
| C | -3.015873385 | -1.682774321 | -0.547919497 |
| C | 5.786170534  | 1.027228548  | 0.399292208  |
| C | 1.645192754  | 0.341712332  | -0.055298590 |
| C | -2.513888014 | -0.346502140 | -0.520317394 |
| C | 3.033885744  | 0.571491239  | 0.098201293  |
| C | -1.136157068 | -0.118385338 | -0.368432025 |
| C | -5.373108857 | -0.819745500 | -0.809183499 |
| H | 7.239819618  | -1.219526098 | 0.617089512  |
| H | 6.846901083  | 1.202904409  | 0.515014314  |
| H | 6.458998266  | 3.626492981  | 0.416899440  |
| H | -6.699268794 | 1.481277811  | -1.018862971 |
| H | -5.906018857 | -3.431169677 | -0.833382843 |
| H | -5.831246050 | 3.778237449  | -0.977433903 |
| H | -3.936413729 | 5.326789731  | -0.797214882 |
| H | -2.044051315 | 6.879644427  | -0.613398742 |
| H | 0.364946432  | 7.269009179  | -0.346535737 |
| H | 2.638351611  | 6.392343053  | -0.071479865 |
| H | 4.918288909  | 5.524777512  | 0.202793183  |
| H | 6.375308298  | -3.516035875 | 0.575256585  |
| H | 4.486239406  | -5.073817349 | 0.399775020  |
| H | 2.606343384  | -6.638143702 | 0.224768857  |
| H | 0.200511844  | -7.046916146 | -0.041865333 |
| H | -2.080644412 | -6.186138580 | -0.328007141 |
| H | -4.362402909 | -5.329683794 | -0.618200706 |
| H | -6.093020714 | -0.903762035 | 0.015253559  |
| H | -5.956964308 | -0.949310183 | -1.729789605 |
| O | -3.938617026 | -2.776265821 | 2.561253881  |
| H | -3.876196266 | -3.326040677 | 1.776816127  |
| H | -3.025667130 | -2.543175143 | 2.805659433  |
| H | -4.239280605 | -0.986598390 | 2.349441103  |
| H | -4.400649508 | 0.328363379  | 3.145610751  |
| O | -4.019829271 | -0.035138413 | 2.344569657  |
| H | -2.250581536 | -0.623540149 | 2.609404724  |
| H | -0.915002654 | -1.229331813 | 2.112390889  |
| O | -1.588338453 | -1.314267153 | 2.790612138  |

**Table S3:** PBE0+D3/6-311++G\*\* optimized equilibrium structures of BzH<sup>+</sup>, CorH<sup>+</sup> and DbcH<sup>+</sup> and of the most stable forms of the BzH<sup>+</sup>-W<sub>n</sub>, CorH<sup>+</sup>-W<sub>n</sub> and DbcH<sup>+</sup>-W<sub>n</sub> (n = 1 – 3) complexes. Close view of the sp<sup>3</sup> C-H bond distances (before and after hydration) and the intermonomer distances (in Å) are given.

|                                                                                                                                                             |                                                                                                                                                                                                                                                                                                                                                                                                                                                                                                                                                                                                                                                                                                                                                                                                                                                                                                                                                                                                                                                                    |
|-------------------------------------------------------------------------------------------------------------------------------------------------------------|--------------------------------------------------------------------------------------------------------------------------------------------------------------------------------------------------------------------------------------------------------------------------------------------------------------------------------------------------------------------------------------------------------------------------------------------------------------------------------------------------------------------------------------------------------------------------------------------------------------------------------------------------------------------------------------------------------------------------------------------------------------------------------------------------------------------------------------------------------------------------------------------------------------------------------------------------------------------------------------------------------------------------------------------------------------------|
| 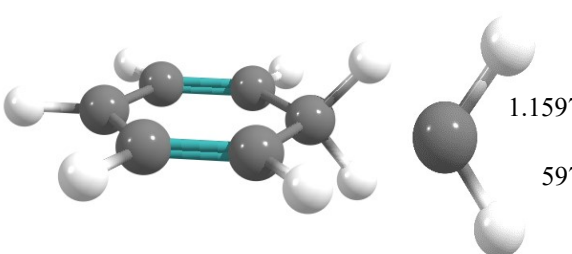                                                                           | <p>C 1.386622000 -0.000018000 0.000119000<br/>           C 0.627945000 -1.248054000 -0.000148000<br/>           C 0.627977000 1.248038000 -0.000148000<br/>           H 1.178337000 -2.184576000 -0.000223000<br/>           H 1.178395000 2.184546000 -0.000223000<br/>           C -0.738165000 -1.236247000 -0.000080000<br/>           C -0.738133000 1.236267000 -0.000080000<br/>           H -1.306871000 -2.158859000 -0.000223000<br/>           H -1.306815000 2.158894000 -0.000223000<br/>           C -1.408235000 0.000018000 0.000188000<br/>           H -2.495570000 0.000033000 0.000363000<br/>           H 2.101559000 -0.000027000 0.847298000<br/>           H 2.102891000 -0.000027000 -0.845881000</p>                                                                                                                                                                                                                                                                                                                                     |
|  <p style="text-align: center;"><b>BzH<sup>+</sup>-W<sub>1</sub></b></p>  | <p>C 0.448369000 0.000991000 0.925029000<br/>           C -0.193672000 -1.238865000 0.549404000<br/>           C -0.195099000 1.239793000 0.548392000<br/>           H 0.255725000 -2.173969000 0.869609000<br/>           H 0.253161000 2.175684000 0.867895000<br/>           C -1.309492000 -1.231081000 -0.247628000<br/>           C -1.310905000 1.230610000 -0.248627000<br/>           H -1.776535000 -2.156925000 -0.562789000<br/>           H -1.779033000 2.155105000 -0.564526000<br/>           C -1.859334000 -0.000990000 -0.636992000<br/>           H -2.747399000 -0.001757000 -1.263490000<br/>           H 0.930908000 0.001664000 1.909550000<br/>           H 1.403499000 0.001111000 0.267263000<br/>           O 2.898345000 -0.000189000 -0.628516000<br/>           H 3.011761000 0.000266000 -1.582909000<br/>           H 3.781946000 0.000881000 -0.249940000</p>                                                                                                                                                                    |
|  <p style="text-align: center;"><b>BzH<sup>+</sup>-W<sub>2</sub></b></p> | <p>C 0.284888000 -0.000067000 -0.000026000<br/>           C -0.460796000 -0.000596000 -1.236370000<br/>           C -0.460751000 0.000438000 1.236346000<br/>           H 0.091908000 -0.000988000 -2.171036000<br/>           H 0.091987000 0.000848000 2.170992000<br/>           C -1.831994000 -0.000619000 -1.230953000<br/>           C -1.831950000 0.000415000 1.230980000<br/>           H -2.397158000 -0.001020000 -2.155739000<br/>           H -2.397080000 0.000797000 2.155787000<br/>           C -2.504346000 -0.000114000 0.000026000<br/>           H -3.591218000 -0.000134000 0.000046000<br/>           H 1.046553000 -0.830676000 0.000284000<br/>           H 1.046572000 0.830522000 -0.000371000<br/>           O 2.273508000 -2.260076000 0.000436000<br/>           H 3.233166000 -2.221842000 -0.000683000<br/>           H 2.050888000 -3.194517000 0.001570000<br/>           H 2.049912000 3.194780000 -0.001511000<br/>           H 3.232610000 2.222616000 0.000673000<br/>           O 2.272936000 2.260435000 -0.000439000</p> |
|                                                                                                                                                             | <p>C 0.511896000 -0.000067000 0.000582000<br/>           C 1.248396000 -0.018589000 -1.233104000<br/>           C 1.249369000 0.018500000 1.233689000</p>                                                                                                                                                                                                                                                                                                                                                                                                                                                                                                                                                                                                                                                                                                                                                                                                                                                                                                          |

|                                                                                                                                                           |                                                                                                                                                                                                                                                                                                                                                                                                                                                                                                                                                                                                                                                                                                                                                                                                                                                                                                                                                                                                                                                                                                                                                                                                                                                                                                                                                                                                                                                                                                                                                                                                                                                                                                                                                                                                                                                                                                                                                                                                                                                                                                                                                                                                                                                                                                                                                                                                                                                                                                                                                                                                                                                                                                                                                                                                                                                                                                                                                                                                                                                                                                                                                                                        |              |              |              |              |   |              |              |             |   |              |              |              |   |              |              |              |   |              |              |              |   |              |              |              |   |              |             |              |   |             |              |              |   |              |             |              |   |              |              |             |   |              |             |              |   |              |              |              |   |              |              |              |   |              |              |              |   |              |              |              |   |              |              |              |   |              |              |              |   |              |              |              |   |              |              |              |   |              |              |              |   |             |             |             |   |             |              |              |   |              |             |             |   |              |             |             |   |              |             |             |   |              |              |             |   |              |             |             |   |              |             |              |   |              |             |              |   |             |             |              |   |              |             |              |   |              |             |              |   |             |             |              |   |             |             |             |   |             |             |              |   |             |             |              |   |             |              |             |
|-----------------------------------------------------------------------------------------------------------------------------------------------------------|----------------------------------------------------------------------------------------------------------------------------------------------------------------------------------------------------------------------------------------------------------------------------------------------------------------------------------------------------------------------------------------------------------------------------------------------------------------------------------------------------------------------------------------------------------------------------------------------------------------------------------------------------------------------------------------------------------------------------------------------------------------------------------------------------------------------------------------------------------------------------------------------------------------------------------------------------------------------------------------------------------------------------------------------------------------------------------------------------------------------------------------------------------------------------------------------------------------------------------------------------------------------------------------------------------------------------------------------------------------------------------------------------------------------------------------------------------------------------------------------------------------------------------------------------------------------------------------------------------------------------------------------------------------------------------------------------------------------------------------------------------------------------------------------------------------------------------------------------------------------------------------------------------------------------------------------------------------------------------------------------------------------------------------------------------------------------------------------------------------------------------------------------------------------------------------------------------------------------------------------------------------------------------------------------------------------------------------------------------------------------------------------------------------------------------------------------------------------------------------------------------------------------------------------------------------------------------------------------------------------------------------------------------------------------------------------------------------------------------------------------------------------------------------------------------------------------------------------------------------------------------------------------------------------------------------------------------------------------------------------------------------------------------------------------------------------------------------------------------------------------------------------------------------------------------------|--------------|--------------|--------------|--------------|---|--------------|--------------|-------------|---|--------------|--------------|--------------|---|--------------|--------------|--------------|---|--------------|--------------|--------------|---|--------------|--------------|--------------|---|--------------|-------------|--------------|---|-------------|--------------|--------------|---|--------------|-------------|--------------|---|--------------|--------------|-------------|---|--------------|-------------|--------------|---|--------------|--------------|--------------|---|--------------|--------------|--------------|---|--------------|--------------|--------------|---|--------------|--------------|--------------|---|--------------|--------------|--------------|---|--------------|--------------|--------------|---|--------------|--------------|--------------|---|--------------|--------------|--------------|---|--------------|--------------|--------------|---|-------------|-------------|-------------|---|-------------|--------------|--------------|---|--------------|-------------|-------------|---|--------------|-------------|-------------|---|--------------|-------------|-------------|---|--------------|--------------|-------------|---|--------------|-------------|-------------|---|--------------|-------------|--------------|---|--------------|-------------|--------------|---|-------------|-------------|--------------|---|--------------|-------------|--------------|---|--------------|-------------|--------------|---|-------------|-------------|--------------|---|-------------|-------------|-------------|---|-------------|-------------|--------------|---|-------------|-------------|--------------|---|-------------|--------------|-------------|
| 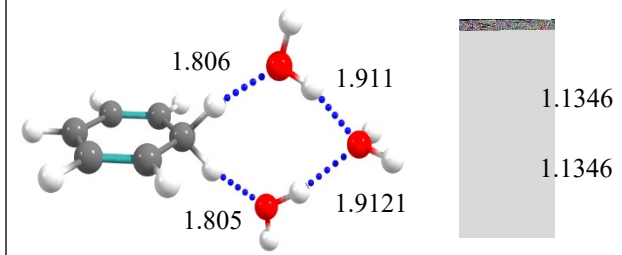 <p style="text-align: center;"><b>BzH<sup>+</sup>-W<sub>3</sub></b></p> | <table border="1"> <tbody> <tr><td>H</td><td>0.693697000</td><td>-0.032763000</td><td>-2.166280000</td></tr> <tr><td>H</td><td>0.695444000</td><td>0.032628000</td><td>2.167326000</td></tr> <tr><td>C</td><td>2.621370000</td><td>-0.018491000</td><td>-1.229261000</td></tr> <tr><td>C</td><td>2.622334000</td><td>0.018486000</td><td>1.228751000</td></tr> <tr><td>H</td><td>3.184914000</td><td>-0.032423000</td><td>-2.154903000</td></tr> <tr><td>H</td><td>3.186613000</td><td>0.032445000</td><td>2.153945000</td></tr> <tr><td>C</td><td>3.295115000</td><td>0.000020000</td><td>-0.000524000</td></tr> <tr><td>H</td><td>4.381782000</td><td>0.000053000</td><td>-0.000949000</td></tr> <tr><td>H</td><td>-0.297298000</td><td>0.795232000</td><td>-0.010863000</td></tr> <tr><td>H</td><td>-0.297257000</td><td>-0.795410000</td><td>0.012447000</td></tr> <tr><td>O</td><td>-1.833068000</td><td>1.745093000</td><td>-0.021237000</td></tr> <tr><td>H</td><td>-2.693404000</td><td>1.299295000</td><td>-0.016427000</td></tr> <tr><td>H</td><td>-1.999115000</td><td>2.689600000</td><td>-0.036330000</td></tr> <tr><td>H</td><td>-2.000067000</td><td>-2.689357000</td><td>0.037847000</td></tr> <tr><td>H</td><td>-2.692935000</td><td>-1.298345000</td><td>0.017326000</td></tr> <tr><td>O</td><td>-1.833057000</td><td>-1.745060000</td><td>0.020545000</td></tr> <tr><td>H</td><td>-4.678180000</td><td>0.010634000</td><td>0.766581000</td></tr> <tr><td>H</td><td>-4.676968000</td><td>-0.011003000</td><td>-0.766995000</td></tr> <tr><td>O</td><td>-4.096138000</td><td>-0.000001000</td><td>0.000252000</td></tr> </tbody> </table>                                                                                                                                                                                                                                                                                                                                                                                                                                                                                                                                                                                                                                                                                                                                                                                                                                                                                                                                                                                                                                                                                                                                                                                                                                                                                                                                                                                                                                                                                                                             | H            | 0.693697000  | -0.032763000 | -2.166280000 | H | 0.695444000  | 0.032628000  | 2.167326000 | C | 2.621370000  | -0.018491000 | -1.229261000 | C | 2.622334000  | 0.018486000  | 1.228751000  | H | 3.184914000  | -0.032423000 | -2.154903000 | H | 3.186613000  | 0.032445000  | 2.153945000  | C | 3.295115000  | 0.000020000 | -0.000524000 | H | 4.381782000 | 0.000053000  | -0.000949000 | H | -0.297298000 | 0.795232000 | -0.010863000 | H | -0.297257000 | -0.795410000 | 0.012447000 | O | -1.833068000 | 1.745093000 | -0.021237000 | H | -2.693404000 | 1.299295000  | -0.016427000 | H | -1.999115000 | 2.689600000  | -0.036330000 | H | -2.000067000 | -2.689357000 | 0.037847000  | H | -2.692935000 | -1.298345000 | 0.017326000  | O | -1.833057000 | -1.745060000 | 0.020545000  | H | -4.678180000 | 0.010634000  | 0.766581000  | H | -4.676968000 | -0.011003000 | -0.766995000 | O | -4.096138000 | -0.000001000 | 0.000252000  |   |              |              |              |   |             |             |             |   |             |              |              |   |              |             |             |   |              |             |             |   |              |             |             |   |              |              |             |   |              |             |             |   |              |             |              |   |              |             |              |   |             |             |              |   |              |             |              |   |              |             |              |   |             |             |              |   |             |             |             |   |             |             |              |   |             |             |              |   |             |              |             |
| H                                                                                                                                                         | 0.693697000                                                                                                                                                                                                                                                                                                                                                                                                                                                                                                                                                                                                                                                                                                                                                                                                                                                                                                                                                                                                                                                                                                                                                                                                                                                                                                                                                                                                                                                                                                                                                                                                                                                                                                                                                                                                                                                                                                                                                                                                                                                                                                                                                                                                                                                                                                                                                                                                                                                                                                                                                                                                                                                                                                                                                                                                                                                                                                                                                                                                                                                                                                                                                                            | -0.032763000 | -2.166280000 |              |              |   |              |              |             |   |              |              |              |   |              |              |              |   |              |              |              |   |              |              |              |   |              |             |              |   |             |              |              |   |              |             |              |   |              |              |             |   |              |             |              |   |              |              |              |   |              |              |              |   |              |              |              |   |              |              |              |   |              |              |              |   |              |              |              |   |              |              |              |   |              |              |              |   |              |              |              |   |             |             |             |   |             |              |              |   |              |             |             |   |              |             |             |   |              |             |             |   |              |              |             |   |              |             |             |   |              |             |              |   |              |             |              |   |             |             |              |   |              |             |              |   |              |             |              |   |             |             |              |   |             |             |             |   |             |             |              |   |             |             |              |   |             |              |             |
| H                                                                                                                                                         | 0.695444000                                                                                                                                                                                                                                                                                                                                                                                                                                                                                                                                                                                                                                                                                                                                                                                                                                                                                                                                                                                                                                                                                                                                                                                                                                                                                                                                                                                                                                                                                                                                                                                                                                                                                                                                                                                                                                                                                                                                                                                                                                                                                                                                                                                                                                                                                                                                                                                                                                                                                                                                                                                                                                                                                                                                                                                                                                                                                                                                                                                                                                                                                                                                                                            | 0.032628000  | 2.167326000  |              |              |   |              |              |             |   |              |              |              |   |              |              |              |   |              |              |              |   |              |              |              |   |              |             |              |   |             |              |              |   |              |             |              |   |              |              |             |   |              |             |              |   |              |              |              |   |              |              |              |   |              |              |              |   |              |              |              |   |              |              |              |   |              |              |              |   |              |              |              |   |              |              |              |   |              |              |              |   |             |             |             |   |             |              |              |   |              |             |             |   |              |             |             |   |              |             |             |   |              |              |             |   |              |             |             |   |              |             |              |   |              |             |              |   |             |             |              |   |              |             |              |   |              |             |              |   |             |             |              |   |             |             |             |   |             |             |              |   |             |             |              |   |             |              |             |
| C                                                                                                                                                         | 2.621370000                                                                                                                                                                                                                                                                                                                                                                                                                                                                                                                                                                                                                                                                                                                                                                                                                                                                                                                                                                                                                                                                                                                                                                                                                                                                                                                                                                                                                                                                                                                                                                                                                                                                                                                                                                                                                                                                                                                                                                                                                                                                                                                                                                                                                                                                                                                                                                                                                                                                                                                                                                                                                                                                                                                                                                                                                                                                                                                                                                                                                                                                                                                                                                            | -0.018491000 | -1.229261000 |              |              |   |              |              |             |   |              |              |              |   |              |              |              |   |              |              |              |   |              |              |              |   |              |             |              |   |             |              |              |   |              |             |              |   |              |              |             |   |              |             |              |   |              |              |              |   |              |              |              |   |              |              |              |   |              |              |              |   |              |              |              |   |              |              |              |   |              |              |              |   |              |              |              |   |              |              |              |   |             |             |             |   |             |              |              |   |              |             |             |   |              |             |             |   |              |             |             |   |              |              |             |   |              |             |             |   |              |             |              |   |              |             |              |   |             |             |              |   |              |             |              |   |              |             |              |   |             |             |              |   |             |             |             |   |             |             |              |   |             |             |              |   |             |              |             |
| C                                                                                                                                                         | 2.622334000                                                                                                                                                                                                                                                                                                                                                                                                                                                                                                                                                                                                                                                                                                                                                                                                                                                                                                                                                                                                                                                                                                                                                                                                                                                                                                                                                                                                                                                                                                                                                                                                                                                                                                                                                                                                                                                                                                                                                                                                                                                                                                                                                                                                                                                                                                                                                                                                                                                                                                                                                                                                                                                                                                                                                                                                                                                                                                                                                                                                                                                                                                                                                                            | 0.018486000  | 1.228751000  |              |              |   |              |              |             |   |              |              |              |   |              |              |              |   |              |              |              |   |              |              |              |   |              |             |              |   |             |              |              |   |              |             |              |   |              |              |             |   |              |             |              |   |              |              |              |   |              |              |              |   |              |              |              |   |              |              |              |   |              |              |              |   |              |              |              |   |              |              |              |   |              |              |              |   |              |              |              |   |             |             |             |   |             |              |              |   |              |             |             |   |              |             |             |   |              |             |             |   |              |              |             |   |              |             |             |   |              |             |              |   |              |             |              |   |             |             |              |   |              |             |              |   |              |             |              |   |             |             |              |   |             |             |             |   |             |             |              |   |             |             |              |   |             |              |             |
| H                                                                                                                                                         | 3.184914000                                                                                                                                                                                                                                                                                                                                                                                                                                                                                                                                                                                                                                                                                                                                                                                                                                                                                                                                                                                                                                                                                                                                                                                                                                                                                                                                                                                                                                                                                                                                                                                                                                                                                                                                                                                                                                                                                                                                                                                                                                                                                                                                                                                                                                                                                                                                                                                                                                                                                                                                                                                                                                                                                                                                                                                                                                                                                                                                                                                                                                                                                                                                                                            | -0.032423000 | -2.154903000 |              |              |   |              |              |             |   |              |              |              |   |              |              |              |   |              |              |              |   |              |              |              |   |              |             |              |   |             |              |              |   |              |             |              |   |              |              |             |   |              |             |              |   |              |              |              |   |              |              |              |   |              |              |              |   |              |              |              |   |              |              |              |   |              |              |              |   |              |              |              |   |              |              |              |   |              |              |              |   |             |             |             |   |             |              |              |   |              |             |             |   |              |             |             |   |              |             |             |   |              |              |             |   |              |             |             |   |              |             |              |   |              |             |              |   |             |             |              |   |              |             |              |   |              |             |              |   |             |             |              |   |             |             |             |   |             |             |              |   |             |             |              |   |             |              |             |
| H                                                                                                                                                         | 3.186613000                                                                                                                                                                                                                                                                                                                                                                                                                                                                                                                                                                                                                                                                                                                                                                                                                                                                                                                                                                                                                                                                                                                                                                                                                                                                                                                                                                                                                                                                                                                                                                                                                                                                                                                                                                                                                                                                                                                                                                                                                                                                                                                                                                                                                                                                                                                                                                                                                                                                                                                                                                                                                                                                                                                                                                                                                                                                                                                                                                                                                                                                                                                                                                            | 0.032445000  | 2.153945000  |              |              |   |              |              |             |   |              |              |              |   |              |              |              |   |              |              |              |   |              |              |              |   |              |             |              |   |             |              |              |   |              |             |              |   |              |              |             |   |              |             |              |   |              |              |              |   |              |              |              |   |              |              |              |   |              |              |              |   |              |              |              |   |              |              |              |   |              |              |              |   |              |              |              |   |              |              |              |   |             |             |             |   |             |              |              |   |              |             |             |   |              |             |             |   |              |             |             |   |              |              |             |   |              |             |             |   |              |             |              |   |              |             |              |   |             |             |              |   |              |             |              |   |              |             |              |   |             |             |              |   |             |             |             |   |             |             |              |   |             |             |              |   |             |              |             |
| C                                                                                                                                                         | 3.295115000                                                                                                                                                                                                                                                                                                                                                                                                                                                                                                                                                                                                                                                                                                                                                                                                                                                                                                                                                                                                                                                                                                                                                                                                                                                                                                                                                                                                                                                                                                                                                                                                                                                                                                                                                                                                                                                                                                                                                                                                                                                                                                                                                                                                                                                                                                                                                                                                                                                                                                                                                                                                                                                                                                                                                                                                                                                                                                                                                                                                                                                                                                                                                                            | 0.000020000  | -0.000524000 |              |              |   |              |              |             |   |              |              |              |   |              |              |              |   |              |              |              |   |              |              |              |   |              |             |              |   |             |              |              |   |              |             |              |   |              |              |             |   |              |             |              |   |              |              |              |   |              |              |              |   |              |              |              |   |              |              |              |   |              |              |              |   |              |              |              |   |              |              |              |   |              |              |              |   |              |              |              |   |             |             |             |   |             |              |              |   |              |             |             |   |              |             |             |   |              |             |             |   |              |              |             |   |              |             |             |   |              |             |              |   |              |             |              |   |             |             |              |   |              |             |              |   |              |             |              |   |             |             |              |   |             |             |             |   |             |             |              |   |             |             |              |   |             |              |             |
| H                                                                                                                                                         | 4.381782000                                                                                                                                                                                                                                                                                                                                                                                                                                                                                                                                                                                                                                                                                                                                                                                                                                                                                                                                                                                                                                                                                                                                                                                                                                                                                                                                                                                                                                                                                                                                                                                                                                                                                                                                                                                                                                                                                                                                                                                                                                                                                                                                                                                                                                                                                                                                                                                                                                                                                                                                                                                                                                                                                                                                                                                                                                                                                                                                                                                                                                                                                                                                                                            | 0.000053000  | -0.000949000 |              |              |   |              |              |             |   |              |              |              |   |              |              |              |   |              |              |              |   |              |              |              |   |              |             |              |   |             |              |              |   |              |             |              |   |              |              |             |   |              |             |              |   |              |              |              |   |              |              |              |   |              |              |              |   |              |              |              |   |              |              |              |   |              |              |              |   |              |              |              |   |              |              |              |   |              |              |              |   |             |             |             |   |             |              |              |   |              |             |             |   |              |             |             |   |              |             |             |   |              |              |             |   |              |             |             |   |              |             |              |   |              |             |              |   |             |             |              |   |              |             |              |   |              |             |              |   |             |             |              |   |             |             |             |   |             |             |              |   |             |             |              |   |             |              |             |
| H                                                                                                                                                         | -0.297298000                                                                                                                                                                                                                                                                                                                                                                                                                                                                                                                                                                                                                                                                                                                                                                                                                                                                                                                                                                                                                                                                                                                                                                                                                                                                                                                                                                                                                                                                                                                                                                                                                                                                                                                                                                                                                                                                                                                                                                                                                                                                                                                                                                                                                                                                                                                                                                                                                                                                                                                                                                                                                                                                                                                                                                                                                                                                                                                                                                                                                                                                                                                                                                           | 0.795232000  | -0.010863000 |              |              |   |              |              |             |   |              |              |              |   |              |              |              |   |              |              |              |   |              |              |              |   |              |             |              |   |             |              |              |   |              |             |              |   |              |              |             |   |              |             |              |   |              |              |              |   |              |              |              |   |              |              |              |   |              |              |              |   |              |              |              |   |              |              |              |   |              |              |              |   |              |              |              |   |              |              |              |   |             |             |             |   |             |              |              |   |              |             |             |   |              |             |             |   |              |             |             |   |              |              |             |   |              |             |             |   |              |             |              |   |              |             |              |   |             |             |              |   |              |             |              |   |              |             |              |   |             |             |              |   |             |             |             |   |             |             |              |   |             |             |              |   |             |              |             |
| H                                                                                                                                                         | -0.297257000                                                                                                                                                                                                                                                                                                                                                                                                                                                                                                                                                                                                                                                                                                                                                                                                                                                                                                                                                                                                                                                                                                                                                                                                                                                                                                                                                                                                                                                                                                                                                                                                                                                                                                                                                                                                                                                                                                                                                                                                                                                                                                                                                                                                                                                                                                                                                                                                                                                                                                                                                                                                                                                                                                                                                                                                                                                                                                                                                                                                                                                                                                                                                                           | -0.795410000 | 0.012447000  |              |              |   |              |              |             |   |              |              |              |   |              |              |              |   |              |              |              |   |              |              |              |   |              |             |              |   |             |              |              |   |              |             |              |   |              |              |             |   |              |             |              |   |              |              |              |   |              |              |              |   |              |              |              |   |              |              |              |   |              |              |              |   |              |              |              |   |              |              |              |   |              |              |              |   |              |              |              |   |             |             |             |   |             |              |              |   |              |             |             |   |              |             |             |   |              |             |             |   |              |              |             |   |              |             |             |   |              |             |              |   |              |             |              |   |             |             |              |   |              |             |              |   |              |             |              |   |             |             |              |   |             |             |             |   |             |             |              |   |             |             |              |   |             |              |             |
| O                                                                                                                                                         | -1.833068000                                                                                                                                                                                                                                                                                                                                                                                                                                                                                                                                                                                                                                                                                                                                                                                                                                                                                                                                                                                                                                                                                                                                                                                                                                                                                                                                                                                                                                                                                                                                                                                                                                                                                                                                                                                                                                                                                                                                                                                                                                                                                                                                                                                                                                                                                                                                                                                                                                                                                                                                                                                                                                                                                                                                                                                                                                                                                                                                                                                                                                                                                                                                                                           | 1.745093000  | -0.021237000 |              |              |   |              |              |             |   |              |              |              |   |              |              |              |   |              |              |              |   |              |              |              |   |              |             |              |   |             |              |              |   |              |             |              |   |              |              |             |   |              |             |              |   |              |              |              |   |              |              |              |   |              |              |              |   |              |              |              |   |              |              |              |   |              |              |              |   |              |              |              |   |              |              |              |   |              |              |              |   |             |             |             |   |             |              |              |   |              |             |             |   |              |             |             |   |              |             |             |   |              |              |             |   |              |             |             |   |              |             |              |   |              |             |              |   |             |             |              |   |              |             |              |   |              |             |              |   |             |             |              |   |             |             |             |   |             |             |              |   |             |             |              |   |             |              |             |
| H                                                                                                                                                         | -2.693404000                                                                                                                                                                                                                                                                                                                                                                                                                                                                                                                                                                                                                                                                                                                                                                                                                                                                                                                                                                                                                                                                                                                                                                                                                                                                                                                                                                                                                                                                                                                                                                                                                                                                                                                                                                                                                                                                                                                                                                                                                                                                                                                                                                                                                                                                                                                                                                                                                                                                                                                                                                                                                                                                                                                                                                                                                                                                                                                                                                                                                                                                                                                                                                           | 1.299295000  | -0.016427000 |              |              |   |              |              |             |   |              |              |              |   |              |              |              |   |              |              |              |   |              |              |              |   |              |             |              |   |             |              |              |   |              |             |              |   |              |              |             |   |              |             |              |   |              |              |              |   |              |              |              |   |              |              |              |   |              |              |              |   |              |              |              |   |              |              |              |   |              |              |              |   |              |              |              |   |              |              |              |   |             |             |             |   |             |              |              |   |              |             |             |   |              |             |             |   |              |             |             |   |              |              |             |   |              |             |             |   |              |             |              |   |              |             |              |   |             |             |              |   |              |             |              |   |              |             |              |   |             |             |              |   |             |             |             |   |             |             |              |   |             |             |              |   |             |              |             |
| H                                                                                                                                                         | -1.999115000                                                                                                                                                                                                                                                                                                                                                                                                                                                                                                                                                                                                                                                                                                                                                                                                                                                                                                                                                                                                                                                                                                                                                                                                                                                                                                                                                                                                                                                                                                                                                                                                                                                                                                                                                                                                                                                                                                                                                                                                                                                                                                                                                                                                                                                                                                                                                                                                                                                                                                                                                                                                                                                                                                                                                                                                                                                                                                                                                                                                                                                                                                                                                                           | 2.689600000  | -0.036330000 |              |              |   |              |              |             |   |              |              |              |   |              |              |              |   |              |              |              |   |              |              |              |   |              |             |              |   |             |              |              |   |              |             |              |   |              |              |             |   |              |             |              |   |              |              |              |   |              |              |              |   |              |              |              |   |              |              |              |   |              |              |              |   |              |              |              |   |              |              |              |   |              |              |              |   |              |              |              |   |             |             |             |   |             |              |              |   |              |             |             |   |              |             |             |   |              |             |             |   |              |              |             |   |              |             |             |   |              |             |              |   |              |             |              |   |             |             |              |   |              |             |              |   |              |             |              |   |             |             |              |   |             |             |             |   |             |             |              |   |             |             |              |   |             |              |             |
| H                                                                                                                                                         | -2.000067000                                                                                                                                                                                                                                                                                                                                                                                                                                                                                                                                                                                                                                                                                                                                                                                                                                                                                                                                                                                                                                                                                                                                                                                                                                                                                                                                                                                                                                                                                                                                                                                                                                                                                                                                                                                                                                                                                                                                                                                                                                                                                                                                                                                                                                                                                                                                                                                                                                                                                                                                                                                                                                                                                                                                                                                                                                                                                                                                                                                                                                                                                                                                                                           | -2.689357000 | 0.037847000  |              |              |   |              |              |             |   |              |              |              |   |              |              |              |   |              |              |              |   |              |              |              |   |              |             |              |   |             |              |              |   |              |             |              |   |              |              |             |   |              |             |              |   |              |              |              |   |              |              |              |   |              |              |              |   |              |              |              |   |              |              |              |   |              |              |              |   |              |              |              |   |              |              |              |   |              |              |              |   |             |             |             |   |             |              |              |   |              |             |             |   |              |             |             |   |              |             |             |   |              |              |             |   |              |             |             |   |              |             |              |   |              |             |              |   |             |             |              |   |              |             |              |   |              |             |              |   |             |             |              |   |             |             |             |   |             |             |              |   |             |             |              |   |             |              |             |
| H                                                                                                                                                         | -2.692935000                                                                                                                                                                                                                                                                                                                                                                                                                                                                                                                                                                                                                                                                                                                                                                                                                                                                                                                                                                                                                                                                                                                                                                                                                                                                                                                                                                                                                                                                                                                                                                                                                                                                                                                                                                                                                                                                                                                                                                                                                                                                                                                                                                                                                                                                                                                                                                                                                                                                                                                                                                                                                                                                                                                                                                                                                                                                                                                                                                                                                                                                                                                                                                           | -1.298345000 | 0.017326000  |              |              |   |              |              |             |   |              |              |              |   |              |              |              |   |              |              |              |   |              |              |              |   |              |             |              |   |             |              |              |   |              |             |              |   |              |              |             |   |              |             |              |   |              |              |              |   |              |              |              |   |              |              |              |   |              |              |              |   |              |              |              |   |              |              |              |   |              |              |              |   |              |              |              |   |              |              |              |   |             |             |             |   |             |              |              |   |              |             |             |   |              |             |             |   |              |             |             |   |              |              |             |   |              |             |             |   |              |             |              |   |              |             |              |   |             |             |              |   |              |             |              |   |              |             |              |   |             |             |              |   |             |             |             |   |             |             |              |   |             |             |              |   |             |              |             |
| O                                                                                                                                                         | -1.833057000                                                                                                                                                                                                                                                                                                                                                                                                                                                                                                                                                                                                                                                                                                                                                                                                                                                                                                                                                                                                                                                                                                                                                                                                                                                                                                                                                                                                                                                                                                                                                                                                                                                                                                                                                                                                                                                                                                                                                                                                                                                                                                                                                                                                                                                                                                                                                                                                                                                                                                                                                                                                                                                                                                                                                                                                                                                                                                                                                                                                                                                                                                                                                                           | -1.745060000 | 0.020545000  |              |              |   |              |              |             |   |              |              |              |   |              |              |              |   |              |              |              |   |              |              |              |   |              |             |              |   |             |              |              |   |              |             |              |   |              |              |             |   |              |             |              |   |              |              |              |   |              |              |              |   |              |              |              |   |              |              |              |   |              |              |              |   |              |              |              |   |              |              |              |   |              |              |              |   |              |              |              |   |             |             |             |   |             |              |              |   |              |             |             |   |              |             |             |   |              |             |             |   |              |              |             |   |              |             |             |   |              |             |              |   |              |             |              |   |             |             |              |   |              |             |              |   |              |             |              |   |             |             |              |   |             |             |             |   |             |             |              |   |             |             |              |   |             |              |             |
| H                                                                                                                                                         | -4.678180000                                                                                                                                                                                                                                                                                                                                                                                                                                                                                                                                                                                                                                                                                                                                                                                                                                                                                                                                                                                                                                                                                                                                                                                                                                                                                                                                                                                                                                                                                                                                                                                                                                                                                                                                                                                                                                                                                                                                                                                                                                                                                                                                                                                                                                                                                                                                                                                                                                                                                                                                                                                                                                                                                                                                                                                                                                                                                                                                                                                                                                                                                                                                                                           | 0.010634000  | 0.766581000  |              |              |   |              |              |             |   |              |              |              |   |              |              |              |   |              |              |              |   |              |              |              |   |              |             |              |   |             |              |              |   |              |             |              |   |              |              |             |   |              |             |              |   |              |              |              |   |              |              |              |   |              |              |              |   |              |              |              |   |              |              |              |   |              |              |              |   |              |              |              |   |              |              |              |   |              |              |              |   |             |             |             |   |             |              |              |   |              |             |             |   |              |             |             |   |              |             |             |   |              |              |             |   |              |             |             |   |              |             |              |   |              |             |              |   |             |             |              |   |              |             |              |   |              |             |              |   |             |             |              |   |             |             |             |   |             |             |              |   |             |             |              |   |             |              |             |
| H                                                                                                                                                         | -4.676968000                                                                                                                                                                                                                                                                                                                                                                                                                                                                                                                                                                                                                                                                                                                                                                                                                                                                                                                                                                                                                                                                                                                                                                                                                                                                                                                                                                                                                                                                                                                                                                                                                                                                                                                                                                                                                                                                                                                                                                                                                                                                                                                                                                                                                                                                                                                                                                                                                                                                                                                                                                                                                                                                                                                                                                                                                                                                                                                                                                                                                                                                                                                                                                           | -0.011003000 | -0.766995000 |              |              |   |              |              |             |   |              |              |              |   |              |              |              |   |              |              |              |   |              |              |              |   |              |             |              |   |             |              |              |   |              |             |              |   |              |              |             |   |              |             |              |   |              |              |              |   |              |              |              |   |              |              |              |   |              |              |              |   |              |              |              |   |              |              |              |   |              |              |              |   |              |              |              |   |              |              |              |   |             |             |             |   |             |              |              |   |              |             |             |   |              |             |             |   |              |             |             |   |              |              |             |   |              |             |             |   |              |             |              |   |              |             |              |   |             |             |              |   |              |             |              |   |              |             |              |   |             |             |              |   |             |             |             |   |             |             |              |   |             |             |              |   |             |              |             |
| O                                                                                                                                                         | -4.096138000                                                                                                                                                                                                                                                                                                                                                                                                                                                                                                                                                                                                                                                                                                                                                                                                                                                                                                                                                                                                                                                                                                                                                                                                                                                                                                                                                                                                                                                                                                                                                                                                                                                                                                                                                                                                                                                                                                                                                                                                                                                                                                                                                                                                                                                                                                                                                                                                                                                                                                                                                                                                                                                                                                                                                                                                                                                                                                                                                                                                                                                                                                                                                                           | -0.000001000 | 0.000252000  |              |              |   |              |              |             |   |              |              |              |   |              |              |              |   |              |              |              |   |              |              |              |   |              |             |              |   |             |              |              |   |              |             |              |   |              |              |             |   |              |             |              |   |              |              |              |   |              |              |              |   |              |              |              |   |              |              |              |   |              |              |              |   |              |              |              |   |              |              |              |   |              |              |              |   |              |              |              |   |             |             |             |   |             |              |              |   |              |             |             |   |              |             |             |   |              |             |             |   |              |              |             |   |              |             |             |   |              |             |              |   |              |             |              |   |             |             |              |   |              |             |              |   |              |             |              |   |             |             |              |   |             |             |             |   |             |             |              |   |             |             |              |   |             |              |             |
|  <p style="text-align: center;"><b>CorH<sup>+</sup></b></p>             | <table border="1"> <tbody> <tr><td>C</td><td>-3.087520000</td><td>-2.142987000</td><td>0.000526000</td></tr> <tr><td>C</td><td>-2.759137000</td><td>-0.760942000</td><td>0.000490000</td></tr> <tr><td>C</td><td>-1.393608000</td><td>-0.380758000</td><td>0.007180000</td></tr> <tr><td>C</td><td>-0.381100000</td><td>-1.370415000</td><td>-0.004910000</td></tr> <tr><td>C</td><td>-0.734706000</td><td>-2.739164000</td><td>-0.000153000</td></tr> <tr><td>C</td><td>-2.112572000</td><td>-3.097339000</td><td>-0.000662000</td></tr> <tr><td>C</td><td>-1.040930000</td><td>0.987492000</td><td>-0.004790000</td></tr> <tr><td>C</td><td>0.987671000</td><td>-0.992535000</td><td>0.006156000</td></tr> <tr><td>C</td><td>1.336850000</td><td>0.388133000</td><td>-0.003914000</td></tr> <tr><td>C</td><td>0.329257000</td><td>1.371291000</td><td>0.006888000</td></tr> <tr><td>C</td><td>2.723439000</td><td>0.802628000</td><td>0.001546000</td></tr> <tr><td>C</td><td>3.702071000</td><td>-0.146352000</td><td>0.000927000</td></tr> <tr><td>C</td><td>3.420749000</td><td>-1.586639000</td><td>0.001427000</td></tr> <tr><td>C</td><td>1.987632000</td><td>-1.985956000</td><td>-0.000733000</td></tr> <tr><td>C</td><td>1.621679000</td><td>-3.331891000</td><td>-0.002602000</td></tr> <tr><td>C</td><td>0.290417000</td><td>-3.701291000</td><td>-0.002466000</td></tr> <tr><td>H</td><td>0.024742000</td><td>-4.753924000</td><td>-0.002856000</td></tr> <tr><td>H</td><td>2.392321000</td><td>-4.096383000</td><td>-0.005184000</td></tr> <tr><td>H</td><td>-4.133634000</td><td>-2.430991000</td><td>-0.000539000</td></tr> <tr><td>H</td><td>-2.377847000</td><td>-4.149719000</td><td>-0.000656000</td></tr> <tr><td>H</td><td>4.744848000</td><td>0.160676000</td><td>0.002770000</td></tr> <tr><td>H</td><td>3.941462000</td><td>-2.041593000</td><td>-0.857559000</td></tr> <tr><td>C</td><td>-3.753894000</td><td>0.248768000</td><td>0.001112000</td></tr> <tr><td>C</td><td>-3.412697000</td><td>1.572546000</td><td>0.000520000</td></tr> <tr><td>C</td><td>-2.051683000</td><td>1.975144000</td><td>0.000994000</td></tr> <tr><td>H</td><td>-4.798152000</td><td>-0.045761000</td><td>0.000003000</td></tr> <tr><td>H</td><td>-4.184329000</td><td>2.335681000</td><td>0.000988000</td></tr> <tr><td>C</td><td>-1.669660000</td><td>3.333885000</td><td>-0.001357000</td></tr> <tr><td>C</td><td>-0.345731000</td><td>3.713101000</td><td>-0.002191000</td></tr> <tr><td>C</td><td>0.678935000</td><td>2.752840000</td><td>-0.001694000</td></tr> <tr><td>H</td><td>-2.445274000</td><td>4.093947000</td><td>-0.001010000</td></tr> <tr><td>H</td><td>-0.082888000</td><td>4.765520000</td><td>-0.004938000</td></tr> <tr><td>C</td><td>3.039476000</td><td>2.205585000</td><td>-0.000341000</td></tr> <tr><td>H</td><td>4.084093000</td><td>2.498741000</td><td>0.000354000</td></tr> <tr><td>C</td><td>2.058029000</td><td>3.136199000</td><td>-0.000976000</td></tr> <tr><td>H</td><td>2.300670000</td><td>4.193568000</td><td>-0.003066000</td></tr> <tr><td>H</td><td>3.936179000</td><td>-2.037816000</td><td>0.865821000</td></tr> </tbody> </table> | C            | -3.087520000 | -2.142987000 | 0.000526000  | C | -2.759137000 | -0.760942000 | 0.000490000 | C | -1.393608000 | -0.380758000 | 0.007180000  | C | -0.381100000 | -1.370415000 | -0.004910000 | C | -0.734706000 | -2.739164000 | -0.000153000 | C | -2.112572000 | -3.097339000 | -0.000662000 | C | -1.040930000 | 0.987492000 | -0.004790000 | C | 0.987671000 | -0.992535000 | 0.006156000  | C | 1.336850000  | 0.388133000 | -0.003914000 | C | 0.329257000  | 1.371291000  | 0.006888000 | C | 2.723439000  | 0.802628000 | 0.001546000  | C | 3.702071000  | -0.146352000 | 0.000927000  | C | 3.420749000  | -1.586639000 | 0.001427000  | C | 1.987632000  | -1.985956000 | -0.000733000 | C | 1.621679000  | -3.331891000 | -0.002602000 | C | 0.290417000  | -3.701291000 | -0.002466000 | H | 0.024742000  | -4.753924000 | -0.002856000 | H | 2.392321000  | -4.096383000 | -0.005184000 | H | -4.133634000 | -2.430991000 | -0.000539000 | H | -2.377847000 | -4.149719000 | -0.000656000 | H | 4.744848000 | 0.160676000 | 0.002770000 | H | 3.941462000 | -2.041593000 | -0.857559000 | C | -3.753894000 | 0.248768000 | 0.001112000 | C | -3.412697000 | 1.572546000 | 0.000520000 | C | -2.051683000 | 1.975144000 | 0.000994000 | H | -4.798152000 | -0.045761000 | 0.000003000 | H | -4.184329000 | 2.335681000 | 0.000988000 | C | -1.669660000 | 3.333885000 | -0.001357000 | C | -0.345731000 | 3.713101000 | -0.002191000 | C | 0.678935000 | 2.752840000 | -0.001694000 | H | -2.445274000 | 4.093947000 | -0.001010000 | H | -0.082888000 | 4.765520000 | -0.004938000 | C | 3.039476000 | 2.205585000 | -0.000341000 | H | 4.084093000 | 2.498741000 | 0.000354000 | C | 2.058029000 | 3.136199000 | -0.000976000 | H | 2.300670000 | 4.193568000 | -0.003066000 | H | 3.936179000 | -2.037816000 | 0.865821000 |
| C                                                                                                                                                         | -3.087520000                                                                                                                                                                                                                                                                                                                                                                                                                                                                                                                                                                                                                                                                                                                                                                                                                                                                                                                                                                                                                                                                                                                                                                                                                                                                                                                                                                                                                                                                                                                                                                                                                                                                                                                                                                                                                                                                                                                                                                                                                                                                                                                                                                                                                                                                                                                                                                                                                                                                                                                                                                                                                                                                                                                                                                                                                                                                                                                                                                                                                                                                                                                                                                           | -2.142987000 | 0.000526000  |              |              |   |              |              |             |   |              |              |              |   |              |              |              |   |              |              |              |   |              |              |              |   |              |             |              |   |             |              |              |   |              |             |              |   |              |              |             |   |              |             |              |   |              |              |              |   |              |              |              |   |              |              |              |   |              |              |              |   |              |              |              |   |              |              |              |   |              |              |              |   |              |              |              |   |              |              |              |   |             |             |             |   |             |              |              |   |              |             |             |   |              |             |             |   |              |             |             |   |              |              |             |   |              |             |             |   |              |             |              |   |              |             |              |   |             |             |              |   |              |             |              |   |              |             |              |   |             |             |              |   |             |             |             |   |             |             |              |   |             |             |              |   |             |              |             |
| C                                                                                                                                                         | -2.759137000                                                                                                                                                                                                                                                                                                                                                                                                                                                                                                                                                                                                                                                                                                                                                                                                                                                                                                                                                                                                                                                                                                                                                                                                                                                                                                                                                                                                                                                                                                                                                                                                                                                                                                                                                                                                                                                                                                                                                                                                                                                                                                                                                                                                                                                                                                                                                                                                                                                                                                                                                                                                                                                                                                                                                                                                                                                                                                                                                                                                                                                                                                                                                                           | -0.760942000 | 0.000490000  |              |              |   |              |              |             |   |              |              |              |   |              |              |              |   |              |              |              |   |              |              |              |   |              |             |              |   |             |              |              |   |              |             |              |   |              |              |             |   |              |             |              |   |              |              |              |   |              |              |              |   |              |              |              |   |              |              |              |   |              |              |              |   |              |              |              |   |              |              |              |   |              |              |              |   |              |              |              |   |             |             |             |   |             |              |              |   |              |             |             |   |              |             |             |   |              |             |             |   |              |              |             |   |              |             |             |   |              |             |              |   |              |             |              |   |             |             |              |   |              |             |              |   |              |             |              |   |             |             |              |   |             |             |             |   |             |             |              |   |             |             |              |   |             |              |             |
| C                                                                                                                                                         | -1.393608000                                                                                                                                                                                                                                                                                                                                                                                                                                                                                                                                                                                                                                                                                                                                                                                                                                                                                                                                                                                                                                                                                                                                                                                                                                                                                                                                                                                                                                                                                                                                                                                                                                                                                                                                                                                                                                                                                                                                                                                                                                                                                                                                                                                                                                                                                                                                                                                                                                                                                                                                                                                                                                                                                                                                                                                                                                                                                                                                                                                                                                                                                                                                                                           | -0.380758000 | 0.007180000  |              |              |   |              |              |             |   |              |              |              |   |              |              |              |   |              |              |              |   |              |              |              |   |              |             |              |   |             |              |              |   |              |             |              |   |              |              |             |   |              |             |              |   |              |              |              |   |              |              |              |   |              |              |              |   |              |              |              |   |              |              |              |   |              |              |              |   |              |              |              |   |              |              |              |   |              |              |              |   |             |             |             |   |             |              |              |   |              |             |             |   |              |             |             |   |              |             |             |   |              |              |             |   |              |             |             |   |              |             |              |   |              |             |              |   |             |             |              |   |              |             |              |   |              |             |              |   |             |             |              |   |             |             |             |   |             |             |              |   |             |             |              |   |             |              |             |
| C                                                                                                                                                         | -0.381100000                                                                                                                                                                                                                                                                                                                                                                                                                                                                                                                                                                                                                                                                                                                                                                                                                                                                                                                                                                                                                                                                                                                                                                                                                                                                                                                                                                                                                                                                                                                                                                                                                                                                                                                                                                                                                                                                                                                                                                                                                                                                                                                                                                                                                                                                                                                                                                                                                                                                                                                                                                                                                                                                                                                                                                                                                                                                                                                                                                                                                                                                                                                                                                           | -1.370415000 | -0.004910000 |              |              |   |              |              |             |   |              |              |              |   |              |              |              |   |              |              |              |   |              |              |              |   |              |             |              |   |             |              |              |   |              |             |              |   |              |              |             |   |              |             |              |   |              |              |              |   |              |              |              |   |              |              |              |   |              |              |              |   |              |              |              |   |              |              |              |   |              |              |              |   |              |              |              |   |              |              |              |   |             |             |             |   |             |              |              |   |              |             |             |   |              |             |             |   |              |             |             |   |              |              |             |   |              |             |             |   |              |             |              |   |              |             |              |   |             |             |              |   |              |             |              |   |              |             |              |   |             |             |              |   |             |             |             |   |             |             |              |   |             |             |              |   |             |              |             |
| C                                                                                                                                                         | -0.734706000                                                                                                                                                                                                                                                                                                                                                                                                                                                                                                                                                                                                                                                                                                                                                                                                                                                                                                                                                                                                                                                                                                                                                                                                                                                                                                                                                                                                                                                                                                                                                                                                                                                                                                                                                                                                                                                                                                                                                                                                                                                                                                                                                                                                                                                                                                                                                                                                                                                                                                                                                                                                                                                                                                                                                                                                                                                                                                                                                                                                                                                                                                                                                                           | -2.739164000 | -0.000153000 |              |              |   |              |              |             |   |              |              |              |   |              |              |              |   |              |              |              |   |              |              |              |   |              |             |              |   |             |              |              |   |              |             |              |   |              |              |             |   |              |             |              |   |              |              |              |   |              |              |              |   |              |              |              |   |              |              |              |   |              |              |              |   |              |              |              |   |              |              |              |   |              |              |              |   |              |              |              |   |             |             |             |   |             |              |              |   |              |             |             |   |              |             |             |   |              |             |             |   |              |              |             |   |              |             |             |   |              |             |              |   |              |             |              |   |             |             |              |   |              |             |              |   |              |             |              |   |             |             |              |   |             |             |             |   |             |             |              |   |             |             |              |   |             |              |             |
| C                                                                                                                                                         | -2.112572000                                                                                                                                                                                                                                                                                                                                                                                                                                                                                                                                                                                                                                                                                                                                                                                                                                                                                                                                                                                                                                                                                                                                                                                                                                                                                                                                                                                                                                                                                                                                                                                                                                                                                                                                                                                                                                                                                                                                                                                                                                                                                                                                                                                                                                                                                                                                                                                                                                                                                                                                                                                                                                                                                                                                                                                                                                                                                                                                                                                                                                                                                                                                                                           | -3.097339000 | -0.000662000 |              |              |   |              |              |             |   |              |              |              |   |              |              |              |   |              |              |              |   |              |              |              |   |              |             |              |   |             |              |              |   |              |             |              |   |              |              |             |   |              |             |              |   |              |              |              |   |              |              |              |   |              |              |              |   |              |              |              |   |              |              |              |   |              |              |              |   |              |              |              |   |              |              |              |   |              |              |              |   |             |             |             |   |             |              |              |   |              |             |             |   |              |             |             |   |              |             |             |   |              |              |             |   |              |             |             |   |              |             |              |   |              |             |              |   |             |             |              |   |              |             |              |   |              |             |              |   |             |             |              |   |             |             |             |   |             |             |              |   |             |             |              |   |             |              |             |
| C                                                                                                                                                         | -1.040930000                                                                                                                                                                                                                                                                                                                                                                                                                                                                                                                                                                                                                                                                                                                                                                                                                                                                                                                                                                                                                                                                                                                                                                                                                                                                                                                                                                                                                                                                                                                                                                                                                                                                                                                                                                                                                                                                                                                                                                                                                                                                                                                                                                                                                                                                                                                                                                                                                                                                                                                                                                                                                                                                                                                                                                                                                                                                                                                                                                                                                                                                                                                                                                           | 0.987492000  | -0.004790000 |              |              |   |              |              |             |   |              |              |              |   |              |              |              |   |              |              |              |   |              |              |              |   |              |             |              |   |             |              |              |   |              |             |              |   |              |              |             |   |              |             |              |   |              |              |              |   |              |              |              |   |              |              |              |   |              |              |              |   |              |              |              |   |              |              |              |   |              |              |              |   |              |              |              |   |              |              |              |   |             |             |             |   |             |              |              |   |              |             |             |   |              |             |             |   |              |             |             |   |              |              |             |   |              |             |             |   |              |             |              |   |              |             |              |   |             |             |              |   |              |             |              |   |              |             |              |   |             |             |              |   |             |             |             |   |             |             |              |   |             |             |              |   |             |              |             |
| C                                                                                                                                                         | 0.987671000                                                                                                                                                                                                                                                                                                                                                                                                                                                                                                                                                                                                                                                                                                                                                                                                                                                                                                                                                                                                                                                                                                                                                                                                                                                                                                                                                                                                                                                                                                                                                                                                                                                                                                                                                                                                                                                                                                                                                                                                                                                                                                                                                                                                                                                                                                                                                                                                                                                                                                                                                                                                                                                                                                                                                                                                                                                                                                                                                                                                                                                                                                                                                                            | -0.992535000 | 0.006156000  |              |              |   |              |              |             |   |              |              |              |   |              |              |              |   |              |              |              |   |              |              |              |   |              |             |              |   |             |              |              |   |              |             |              |   |              |              |             |   |              |             |              |   |              |              |              |   |              |              |              |   |              |              |              |   |              |              |              |   |              |              |              |   |              |              |              |   |              |              |              |   |              |              |              |   |              |              |              |   |             |             |             |   |             |              |              |   |              |             |             |   |              |             |             |   |              |             |             |   |              |              |             |   |              |             |             |   |              |             |              |   |              |             |              |   |             |             |              |   |              |             |              |   |              |             |              |   |             |             |              |   |             |             |             |   |             |             |              |   |             |             |              |   |             |              |             |
| C                                                                                                                                                         | 1.336850000                                                                                                                                                                                                                                                                                                                                                                                                                                                                                                                                                                                                                                                                                                                                                                                                                                                                                                                                                                                                                                                                                                                                                                                                                                                                                                                                                                                                                                                                                                                                                                                                                                                                                                                                                                                                                                                                                                                                                                                                                                                                                                                                                                                                                                                                                                                                                                                                                                                                                                                                                                                                                                                                                                                                                                                                                                                                                                                                                                                                                                                                                                                                                                            | 0.388133000  | -0.003914000 |              |              |   |              |              |             |   |              |              |              |   |              |              |              |   |              |              |              |   |              |              |              |   |              |             |              |   |             |              |              |   |              |             |              |   |              |              |             |   |              |             |              |   |              |              |              |   |              |              |              |   |              |              |              |   |              |              |              |   |              |              |              |   |              |              |              |   |              |              |              |   |              |              |              |   |              |              |              |   |             |             |             |   |             |              |              |   |              |             |             |   |              |             |             |   |              |             |             |   |              |              |             |   |              |             |             |   |              |             |              |   |              |             |              |   |             |             |              |   |              |             |              |   |              |             |              |   |             |             |              |   |             |             |             |   |             |             |              |   |             |             |              |   |             |              |             |
| C                                                                                                                                                         | 0.329257000                                                                                                                                                                                                                                                                                                                                                                                                                                                                                                                                                                                                                                                                                                                                                                                                                                                                                                                                                                                                                                                                                                                                                                                                                                                                                                                                                                                                                                                                                                                                                                                                                                                                                                                                                                                                                                                                                                                                                                                                                                                                                                                                                                                                                                                                                                                                                                                                                                                                                                                                                                                                                                                                                                                                                                                                                                                                                                                                                                                                                                                                                                                                                                            | 1.371291000  | 0.006888000  |              |              |   |              |              |             |   |              |              |              |   |              |              |              |   |              |              |              |   |              |              |              |   |              |             |              |   |             |              |              |   |              |             |              |   |              |              |             |   |              |             |              |   |              |              |              |   |              |              |              |   |              |              |              |   |              |              |              |   |              |              |              |   |              |              |              |   |              |              |              |   |              |              |              |   |              |              |              |   |             |             |             |   |             |              |              |   |              |             |             |   |              |             |             |   |              |             |             |   |              |              |             |   |              |             |             |   |              |             |              |   |              |             |              |   |             |             |              |   |              |             |              |   |              |             |              |   |             |             |              |   |             |             |             |   |             |             |              |   |             |             |              |   |             |              |             |
| C                                                                                                                                                         | 2.723439000                                                                                                                                                                                                                                                                                                                                                                                                                                                                                                                                                                                                                                                                                                                                                                                                                                                                                                                                                                                                                                                                                                                                                                                                                                                                                                                                                                                                                                                                                                                                                                                                                                                                                                                                                                                                                                                                                                                                                                                                                                                                                                                                                                                                                                                                                                                                                                                                                                                                                                                                                                                                                                                                                                                                                                                                                                                                                                                                                                                                                                                                                                                                                                            | 0.802628000  | 0.001546000  |              |              |   |              |              |             |   |              |              |              |   |              |              |              |   |              |              |              |   |              |              |              |   |              |             |              |   |             |              |              |   |              |             |              |   |              |              |             |   |              |             |              |   |              |              |              |   |              |              |              |   |              |              |              |   |              |              |              |   |              |              |              |   |              |              |              |   |              |              |              |   |              |              |              |   |              |              |              |   |             |             |             |   |             |              |              |   |              |             |             |   |              |             |             |   |              |             |             |   |              |              |             |   |              |             |             |   |              |             |              |   |              |             |              |   |             |             |              |   |              |             |              |   |              |             |              |   |             |             |              |   |             |             |             |   |             |             |              |   |             |             |              |   |             |              |             |
| C                                                                                                                                                         | 3.702071000                                                                                                                                                                                                                                                                                                                                                                                                                                                                                                                                                                                                                                                                                                                                                                                                                                                                                                                                                                                                                                                                                                                                                                                                                                                                                                                                                                                                                                                                                                                                                                                                                                                                                                                                                                                                                                                                                                                                                                                                                                                                                                                                                                                                                                                                                                                                                                                                                                                                                                                                                                                                                                                                                                                                                                                                                                                                                                                                                                                                                                                                                                                                                                            | -0.146352000 | 0.000927000  |              |              |   |              |              |             |   |              |              |              |   |              |              |              |   |              |              |              |   |              |              |              |   |              |             |              |   |             |              |              |   |              |             |              |   |              |              |             |   |              |             |              |   |              |              |              |   |              |              |              |   |              |              |              |   |              |              |              |   |              |              |              |   |              |              |              |   |              |              |              |   |              |              |              |   |              |              |              |   |             |             |             |   |             |              |              |   |              |             |             |   |              |             |             |   |              |             |             |   |              |              |             |   |              |             |             |   |              |             |              |   |              |             |              |   |             |             |              |   |              |             |              |   |              |             |              |   |             |             |              |   |             |             |             |   |             |             |              |   |             |             |              |   |             |              |             |
| C                                                                                                                                                         | 3.420749000                                                                                                                                                                                                                                                                                                                                                                                                                                                                                                                                                                                                                                                                                                                                                                                                                                                                                                                                                                                                                                                                                                                                                                                                                                                                                                                                                                                                                                                                                                                                                                                                                                                                                                                                                                                                                                                                                                                                                                                                                                                                                                                                                                                                                                                                                                                                                                                                                                                                                                                                                                                                                                                                                                                                                                                                                                                                                                                                                                                                                                                                                                                                                                            | -1.586639000 | 0.001427000  |              |              |   |              |              |             |   |              |              |              |   |              |              |              |   |              |              |              |   |              |              |              |   |              |             |              |   |             |              |              |   |              |             |              |   |              |              |             |   |              |             |              |   |              |              |              |   |              |              |              |   |              |              |              |   |              |              |              |   |              |              |              |   |              |              |              |   |              |              |              |   |              |              |              |   |              |              |              |   |             |             |             |   |             |              |              |   |              |             |             |   |              |             |             |   |              |             |             |   |              |              |             |   |              |             |             |   |              |             |              |   |              |             |              |   |             |             |              |   |              |             |              |   |              |             |              |   |             |             |              |   |             |             |             |   |             |             |              |   |             |             |              |   |             |              |             |
| C                                                                                                                                                         | 1.987632000                                                                                                                                                                                                                                                                                                                                                                                                                                                                                                                                                                                                                                                                                                                                                                                                                                                                                                                                                                                                                                                                                                                                                                                                                                                                                                                                                                                                                                                                                                                                                                                                                                                                                                                                                                                                                                                                                                                                                                                                                                                                                                                                                                                                                                                                                                                                                                                                                                                                                                                                                                                                                                                                                                                                                                                                                                                                                                                                                                                                                                                                                                                                                                            | -1.985956000 | -0.000733000 |              |              |   |              |              |             |   |              |              |              |   |              |              |              |   |              |              |              |   |              |              |              |   |              |             |              |   |             |              |              |   |              |             |              |   |              |              |             |   |              |             |              |   |              |              |              |   |              |              |              |   |              |              |              |   |              |              |              |   |              |              |              |   |              |              |              |   |              |              |              |   |              |              |              |   |              |              |              |   |             |             |             |   |             |              |              |   |              |             |             |   |              |             |             |   |              |             |             |   |              |              |             |   |              |             |             |   |              |             |              |   |              |             |              |   |             |             |              |   |              |             |              |   |              |             |              |   |             |             |              |   |             |             |             |   |             |             |              |   |             |             |              |   |             |              |             |
| C                                                                                                                                                         | 1.621679000                                                                                                                                                                                                                                                                                                                                                                                                                                                                                                                                                                                                                                                                                                                                                                                                                                                                                                                                                                                                                                                                                                                                                                                                                                                                                                                                                                                                                                                                                                                                                                                                                                                                                                                                                                                                                                                                                                                                                                                                                                                                                                                                                                                                                                                                                                                                                                                                                                                                                                                                                                                                                                                                                                                                                                                                                                                                                                                                                                                                                                                                                                                                                                            | -3.331891000 | -0.002602000 |              |              |   |              |              |             |   |              |              |              |   |              |              |              |   |              |              |              |   |              |              |              |   |              |             |              |   |             |              |              |   |              |             |              |   |              |              |             |   |              |             |              |   |              |              |              |   |              |              |              |   |              |              |              |   |              |              |              |   |              |              |              |   |              |              |              |   |              |              |              |   |              |              |              |   |              |              |              |   |             |             |             |   |             |              |              |   |              |             |             |   |              |             |             |   |              |             |             |   |              |              |             |   |              |             |             |   |              |             |              |   |              |             |              |   |             |             |              |   |              |             |              |   |              |             |              |   |             |             |              |   |             |             |             |   |             |             |              |   |             |             |              |   |             |              |             |
| C                                                                                                                                                         | 0.290417000                                                                                                                                                                                                                                                                                                                                                                                                                                                                                                                                                                                                                                                                                                                                                                                                                                                                                                                                                                                                                                                                                                                                                                                                                                                                                                                                                                                                                                                                                                                                                                                                                                                                                                                                                                                                                                                                                                                                                                                                                                                                                                                                                                                                                                                                                                                                                                                                                                                                                                                                                                                                                                                                                                                                                                                                                                                                                                                                                                                                                                                                                                                                                                            | -3.701291000 | -0.002466000 |              |              |   |              |              |             |   |              |              |              |   |              |              |              |   |              |              |              |   |              |              |              |   |              |             |              |   |             |              |              |   |              |             |              |   |              |              |             |   |              |             |              |   |              |              |              |   |              |              |              |   |              |              |              |   |              |              |              |   |              |              |              |   |              |              |              |   |              |              |              |   |              |              |              |   |              |              |              |   |             |             |             |   |             |              |              |   |              |             |             |   |              |             |             |   |              |             |             |   |              |              |             |   |              |             |             |   |              |             |              |   |              |             |              |   |             |             |              |   |              |             |              |   |              |             |              |   |             |             |              |   |             |             |             |   |             |             |              |   |             |             |              |   |             |              |             |
| H                                                                                                                                                         | 0.024742000                                                                                                                                                                                                                                                                                                                                                                                                                                                                                                                                                                                                                                                                                                                                                                                                                                                                                                                                                                                                                                                                                                                                                                                                                                                                                                                                                                                                                                                                                                                                                                                                                                                                                                                                                                                                                                                                                                                                                                                                                                                                                                                                                                                                                                                                                                                                                                                                                                                                                                                                                                                                                                                                                                                                                                                                                                                                                                                                                                                                                                                                                                                                                                            | -4.753924000 | -0.002856000 |              |              |   |              |              |             |   |              |              |              |   |              |              |              |   |              |              |              |   |              |              |              |   |              |             |              |   |             |              |              |   |              |             |              |   |              |              |             |   |              |             |              |   |              |              |              |   |              |              |              |   |              |              |              |   |              |              |              |   |              |              |              |   |              |              |              |   |              |              |              |   |              |              |              |   |              |              |              |   |             |             |             |   |             |              |              |   |              |             |             |   |              |             |             |   |              |             |             |   |              |              |             |   |              |             |             |   |              |             |              |   |              |             |              |   |             |             |              |   |              |             |              |   |              |             |              |   |             |             |              |   |             |             |             |   |             |             |              |   |             |             |              |   |             |              |             |
| H                                                                                                                                                         | 2.392321000                                                                                                                                                                                                                                                                                                                                                                                                                                                                                                                                                                                                                                                                                                                                                                                                                                                                                                                                                                                                                                                                                                                                                                                                                                                                                                                                                                                                                                                                                                                                                                                                                                                                                                                                                                                                                                                                                                                                                                                                                                                                                                                                                                                                                                                                                                                                                                                                                                                                                                                                                                                                                                                                                                                                                                                                                                                                                                                                                                                                                                                                                                                                                                            | -4.096383000 | -0.005184000 |              |              |   |              |              |             |   |              |              |              |   |              |              |              |   |              |              |              |   |              |              |              |   |              |             |              |   |             |              |              |   |              |             |              |   |              |              |             |   |              |             |              |   |              |              |              |   |              |              |              |   |              |              |              |   |              |              |              |   |              |              |              |   |              |              |              |   |              |              |              |   |              |              |              |   |              |              |              |   |             |             |             |   |             |              |              |   |              |             |             |   |              |             |             |   |              |             |             |   |              |              |             |   |              |             |             |   |              |             |              |   |              |             |              |   |             |             |              |   |              |             |              |   |              |             |              |   |             |             |              |   |             |             |             |   |             |             |              |   |             |             |              |   |             |              |             |
| H                                                                                                                                                         | -4.133634000                                                                                                                                                                                                                                                                                                                                                                                                                                                                                                                                                                                                                                                                                                                                                                                                                                                                                                                                                                                                                                                                                                                                                                                                                                                                                                                                                                                                                                                                                                                                                                                                                                                                                                                                                                                                                                                                                                                                                                                                                                                                                                                                                                                                                                                                                                                                                                                                                                                                                                                                                                                                                                                                                                                                                                                                                                                                                                                                                                                                                                                                                                                                                                           | -2.430991000 | -0.000539000 |              |              |   |              |              |             |   |              |              |              |   |              |              |              |   |              |              |              |   |              |              |              |   |              |             |              |   |             |              |              |   |              |             |              |   |              |              |             |   |              |             |              |   |              |              |              |   |              |              |              |   |              |              |              |   |              |              |              |   |              |              |              |   |              |              |              |   |              |              |              |   |              |              |              |   |              |              |              |   |             |             |             |   |             |              |              |   |              |             |             |   |              |             |             |   |              |             |             |   |              |              |             |   |              |             |             |   |              |             |              |   |              |             |              |   |             |             |              |   |              |             |              |   |              |             |              |   |             |             |              |   |             |             |             |   |             |             |              |   |             |             |              |   |             |              |             |
| H                                                                                                                                                         | -2.377847000                                                                                                                                                                                                                                                                                                                                                                                                                                                                                                                                                                                                                                                                                                                                                                                                                                                                                                                                                                                                                                                                                                                                                                                                                                                                                                                                                                                                                                                                                                                                                                                                                                                                                                                                                                                                                                                                                                                                                                                                                                                                                                                                                                                                                                                                                                                                                                                                                                                                                                                                                                                                                                                                                                                                                                                                                                                                                                                                                                                                                                                                                                                                                                           | -4.149719000 | -0.000656000 |              |              |   |              |              |             |   |              |              |              |   |              |              |              |   |              |              |              |   |              |              |              |   |              |             |              |   |             |              |              |   |              |             |              |   |              |              |             |   |              |             |              |   |              |              |              |   |              |              |              |   |              |              |              |   |              |              |              |   |              |              |              |   |              |              |              |   |              |              |              |   |              |              |              |   |              |              |              |   |             |             |             |   |             |              |              |   |              |             |             |   |              |             |             |   |              |             |             |   |              |              |             |   |              |             |             |   |              |             |              |   |              |             |              |   |             |             |              |   |              |             |              |   |              |             |              |   |             |             |              |   |             |             |             |   |             |             |              |   |             |             |              |   |             |              |             |
| H                                                                                                                                                         | 4.744848000                                                                                                                                                                                                                                                                                                                                                                                                                                                                                                                                                                                                                                                                                                                                                                                                                                                                                                                                                                                                                                                                                                                                                                                                                                                                                                                                                                                                                                                                                                                                                                                                                                                                                                                                                                                                                                                                                                                                                                                                                                                                                                                                                                                                                                                                                                                                                                                                                                                                                                                                                                                                                                                                                                                                                                                                                                                                                                                                                                                                                                                                                                                                                                            | 0.160676000  | 0.002770000  |              |              |   |              |              |             |   |              |              |              |   |              |              |              |   |              |              |              |   |              |              |              |   |              |             |              |   |             |              |              |   |              |             |              |   |              |              |             |   |              |             |              |   |              |              |              |   |              |              |              |   |              |              |              |   |              |              |              |   |              |              |              |   |              |              |              |   |              |              |              |   |              |              |              |   |              |              |              |   |             |             |             |   |             |              |              |   |              |             |             |   |              |             |             |   |              |             |             |   |              |              |             |   |              |             |             |   |              |             |              |   |              |             |              |   |             |             |              |   |              |             |              |   |              |             |              |   |             |             |              |   |             |             |             |   |             |             |              |   |             |             |              |   |             |              |             |
| H                                                                                                                                                         | 3.941462000                                                                                                                                                                                                                                                                                                                                                                                                                                                                                                                                                                                                                                                                                                                                                                                                                                                                                                                                                                                                                                                                                                                                                                                                                                                                                                                                                                                                                                                                                                                                                                                                                                                                                                                                                                                                                                                                                                                                                                                                                                                                                                                                                                                                                                                                                                                                                                                                                                                                                                                                                                                                                                                                                                                                                                                                                                                                                                                                                                                                                                                                                                                                                                            | -2.041593000 | -0.857559000 |              |              |   |              |              |             |   |              |              |              |   |              |              |              |   |              |              |              |   |              |              |              |   |              |             |              |   |             |              |              |   |              |             |              |   |              |              |             |   |              |             |              |   |              |              |              |   |              |              |              |   |              |              |              |   |              |              |              |   |              |              |              |   |              |              |              |   |              |              |              |   |              |              |              |   |              |              |              |   |             |             |             |   |             |              |              |   |              |             |             |   |              |             |             |   |              |             |             |   |              |              |             |   |              |             |             |   |              |             |              |   |              |             |              |   |             |             |              |   |              |             |              |   |              |             |              |   |             |             |              |   |             |             |             |   |             |             |              |   |             |             |              |   |             |              |             |
| C                                                                                                                                                         | -3.753894000                                                                                                                                                                                                                                                                                                                                                                                                                                                                                                                                                                                                                                                                                                                                                                                                                                                                                                                                                                                                                                                                                                                                                                                                                                                                                                                                                                                                                                                                                                                                                                                                                                                                                                                                                                                                                                                                                                                                                                                                                                                                                                                                                                                                                                                                                                                                                                                                                                                                                                                                                                                                                                                                                                                                                                                                                                                                                                                                                                                                                                                                                                                                                                           | 0.248768000  | 0.001112000  |              |              |   |              |              |             |   |              |              |              |   |              |              |              |   |              |              |              |   |              |              |              |   |              |             |              |   |             |              |              |   |              |             |              |   |              |              |             |   |              |             |              |   |              |              |              |   |              |              |              |   |              |              |              |   |              |              |              |   |              |              |              |   |              |              |              |   |              |              |              |   |              |              |              |   |              |              |              |   |             |             |             |   |             |              |              |   |              |             |             |   |              |             |             |   |              |             |             |   |              |              |             |   |              |             |             |   |              |             |              |   |              |             |              |   |             |             |              |   |              |             |              |   |              |             |              |   |             |             |              |   |             |             |             |   |             |             |              |   |             |             |              |   |             |              |             |
| C                                                                                                                                                         | -3.412697000                                                                                                                                                                                                                                                                                                                                                                                                                                                                                                                                                                                                                                                                                                                                                                                                                                                                                                                                                                                                                                                                                                                                                                                                                                                                                                                                                                                                                                                                                                                                                                                                                                                                                                                                                                                                                                                                                                                                                                                                                                                                                                                                                                                                                                                                                                                                                                                                                                                                                                                                                                                                                                                                                                                                                                                                                                                                                                                                                                                                                                                                                                                                                                           | 1.572546000  | 0.000520000  |              |              |   |              |              |             |   |              |              |              |   |              |              |              |   |              |              |              |   |              |              |              |   |              |             |              |   |             |              |              |   |              |             |              |   |              |              |             |   |              |             |              |   |              |              |              |   |              |              |              |   |              |              |              |   |              |              |              |   |              |              |              |   |              |              |              |   |              |              |              |   |              |              |              |   |              |              |              |   |             |             |             |   |             |              |              |   |              |             |             |   |              |             |             |   |              |             |             |   |              |              |             |   |              |             |             |   |              |             |              |   |              |             |              |   |             |             |              |   |              |             |              |   |              |             |              |   |             |             |              |   |             |             |             |   |             |             |              |   |             |             |              |   |             |              |             |
| C                                                                                                                                                         | -2.051683000                                                                                                                                                                                                                                                                                                                                                                                                                                                                                                                                                                                                                                                                                                                                                                                                                                                                                                                                                                                                                                                                                                                                                                                                                                                                                                                                                                                                                                                                                                                                                                                                                                                                                                                                                                                                                                                                                                                                                                                                                                                                                                                                                                                                                                                                                                                                                                                                                                                                                                                                                                                                                                                                                                                                                                                                                                                                                                                                                                                                                                                                                                                                                                           | 1.975144000  | 0.000994000  |              |              |   |              |              |             |   |              |              |              |   |              |              |              |   |              |              |              |   |              |              |              |   |              |             |              |   |             |              |              |   |              |             |              |   |              |              |             |   |              |             |              |   |              |              |              |   |              |              |              |   |              |              |              |   |              |              |              |   |              |              |              |   |              |              |              |   |              |              |              |   |              |              |              |   |              |              |              |   |             |             |             |   |             |              |              |   |              |             |             |   |              |             |             |   |              |             |             |   |              |              |             |   |              |             |             |   |              |             |              |   |              |             |              |   |             |             |              |   |              |             |              |   |              |             |              |   |             |             |              |   |             |             |             |   |             |             |              |   |             |             |              |   |             |              |             |
| H                                                                                                                                                         | -4.798152000                                                                                                                                                                                                                                                                                                                                                                                                                                                                                                                                                                                                                                                                                                                                                                                                                                                                                                                                                                                                                                                                                                                                                                                                                                                                                                                                                                                                                                                                                                                                                                                                                                                                                                                                                                                                                                                                                                                                                                                                                                                                                                                                                                                                                                                                                                                                                                                                                                                                                                                                                                                                                                                                                                                                                                                                                                                                                                                                                                                                                                                                                                                                                                           | -0.045761000 | 0.000003000  |              |              |   |              |              |             |   |              |              |              |   |              |              |              |   |              |              |              |   |              |              |              |   |              |             |              |   |             |              |              |   |              |             |              |   |              |              |             |   |              |             |              |   |              |              |              |   |              |              |              |   |              |              |              |   |              |              |              |   |              |              |              |   |              |              |              |   |              |              |              |   |              |              |              |   |              |              |              |   |             |             |             |   |             |              |              |   |              |             |             |   |              |             |             |   |              |             |             |   |              |              |             |   |              |             |             |   |              |             |              |   |              |             |              |   |             |             |              |   |              |             |              |   |              |             |              |   |             |             |              |   |             |             |             |   |             |             |              |   |             |             |              |   |             |              |             |
| H                                                                                                                                                         | -4.184329000                                                                                                                                                                                                                                                                                                                                                                                                                                                                                                                                                                                                                                                                                                                                                                                                                                                                                                                                                                                                                                                                                                                                                                                                                                                                                                                                                                                                                                                                                                                                                                                                                                                                                                                                                                                                                                                                                                                                                                                                                                                                                                                                                                                                                                                                                                                                                                                                                                                                                                                                                                                                                                                                                                                                                                                                                                                                                                                                                                                                                                                                                                                                                                           | 2.335681000  | 0.000988000  |              |              |   |              |              |             |   |              |              |              |   |              |              |              |   |              |              |              |   |              |              |              |   |              |             |              |   |             |              |              |   |              |             |              |   |              |              |             |   |              |             |              |   |              |              |              |   |              |              |              |   |              |              |              |   |              |              |              |   |              |              |              |   |              |              |              |   |              |              |              |   |              |              |              |   |              |              |              |   |             |             |             |   |             |              |              |   |              |             |             |   |              |             |             |   |              |             |             |   |              |              |             |   |              |             |             |   |              |             |              |   |              |             |              |   |             |             |              |   |              |             |              |   |              |             |              |   |             |             |              |   |             |             |             |   |             |             |              |   |             |             |              |   |             |              |             |
| C                                                                                                                                                         | -1.669660000                                                                                                                                                                                                                                                                                                                                                                                                                                                                                                                                                                                                                                                                                                                                                                                                                                                                                                                                                                                                                                                                                                                                                                                                                                                                                                                                                                                                                                                                                                                                                                                                                                                                                                                                                                                                                                                                                                                                                                                                                                                                                                                                                                                                                                                                                                                                                                                                                                                                                                                                                                                                                                                                                                                                                                                                                                                                                                                                                                                                                                                                                                                                                                           | 3.333885000  | -0.001357000 |              |              |   |              |              |             |   |              |              |              |   |              |              |              |   |              |              |              |   |              |              |              |   |              |             |              |   |             |              |              |   |              |             |              |   |              |              |             |   |              |             |              |   |              |              |              |   |              |              |              |   |              |              |              |   |              |              |              |   |              |              |              |   |              |              |              |   |              |              |              |   |              |              |              |   |              |              |              |   |             |             |             |   |             |              |              |   |              |             |             |   |              |             |             |   |              |             |             |   |              |              |             |   |              |             |             |   |              |             |              |   |              |             |              |   |             |             |              |   |              |             |              |   |              |             |              |   |             |             |              |   |             |             |             |   |             |             |              |   |             |             |              |   |             |              |             |
| C                                                                                                                                                         | -0.345731000                                                                                                                                                                                                                                                                                                                                                                                                                                                                                                                                                                                                                                                                                                                                                                                                                                                                                                                                                                                                                                                                                                                                                                                                                                                                                                                                                                                                                                                                                                                                                                                                                                                                                                                                                                                                                                                                                                                                                                                                                                                                                                                                                                                                                                                                                                                                                                                                                                                                                                                                                                                                                                                                                                                                                                                                                                                                                                                                                                                                                                                                                                                                                                           | 3.713101000  | -0.002191000 |              |              |   |              |              |             |   |              |              |              |   |              |              |              |   |              |              |              |   |              |              |              |   |              |             |              |   |             |              |              |   |              |             |              |   |              |              |             |   |              |             |              |   |              |              |              |   |              |              |              |   |              |              |              |   |              |              |              |   |              |              |              |   |              |              |              |   |              |              |              |   |              |              |              |   |              |              |              |   |             |             |             |   |             |              |              |   |              |             |             |   |              |             |             |   |              |             |             |   |              |              |             |   |              |             |             |   |              |             |              |   |              |             |              |   |             |             |              |   |              |             |              |   |              |             |              |   |             |             |              |   |             |             |             |   |             |             |              |   |             |             |              |   |             |              |             |
| C                                                                                                                                                         | 0.678935000                                                                                                                                                                                                                                                                                                                                                                                                                                                                                                                                                                                                                                                                                                                                                                                                                                                                                                                                                                                                                                                                                                                                                                                                                                                                                                                                                                                                                                                                                                                                                                                                                                                                                                                                                                                                                                                                                                                                                                                                                                                                                                                                                                                                                                                                                                                                                                                                                                                                                                                                                                                                                                                                                                                                                                                                                                                                                                                                                                                                                                                                                                                                                                            | 2.752840000  | -0.001694000 |              |              |   |              |              |             |   |              |              |              |   |              |              |              |   |              |              |              |   |              |              |              |   |              |             |              |   |             |              |              |   |              |             |              |   |              |              |             |   |              |             |              |   |              |              |              |   |              |              |              |   |              |              |              |   |              |              |              |   |              |              |              |   |              |              |              |   |              |              |              |   |              |              |              |   |              |              |              |   |             |             |             |   |             |              |              |   |              |             |             |   |              |             |             |   |              |             |             |   |              |              |             |   |              |             |             |   |              |             |              |   |              |             |              |   |             |             |              |   |              |             |              |   |              |             |              |   |             |             |              |   |             |             |             |   |             |             |              |   |             |             |              |   |             |              |             |
| H                                                                                                                                                         | -2.445274000                                                                                                                                                                                                                                                                                                                                                                                                                                                                                                                                                                                                                                                                                                                                                                                                                                                                                                                                                                                                                                                                                                                                                                                                                                                                                                                                                                                                                                                                                                                                                                                                                                                                                                                                                                                                                                                                                                                                                                                                                                                                                                                                                                                                                                                                                                                                                                                                                                                                                                                                                                                                                                                                                                                                                                                                                                                                                                                                                                                                                                                                                                                                                                           | 4.093947000  | -0.001010000 |              |              |   |              |              |             |   |              |              |              |   |              |              |              |   |              |              |              |   |              |              |              |   |              |             |              |   |             |              |              |   |              |             |              |   |              |              |             |   |              |             |              |   |              |              |              |   |              |              |              |   |              |              |              |   |              |              |              |   |              |              |              |   |              |              |              |   |              |              |              |   |              |              |              |   |              |              |              |   |             |             |             |   |             |              |              |   |              |             |             |   |              |             |             |   |              |             |             |   |              |              |             |   |              |             |             |   |              |             |              |   |              |             |              |   |             |             |              |   |              |             |              |   |              |             |              |   |             |             |              |   |             |             |             |   |             |             |              |   |             |             |              |   |             |              |             |
| H                                                                                                                                                         | -0.082888000                                                                                                                                                                                                                                                                                                                                                                                                                                                                                                                                                                                                                                                                                                                                                                                                                                                                                                                                                                                                                                                                                                                                                                                                                                                                                                                                                                                                                                                                                                                                                                                                                                                                                                                                                                                                                                                                                                                                                                                                                                                                                                                                                                                                                                                                                                                                                                                                                                                                                                                                                                                                                                                                                                                                                                                                                                                                                                                                                                                                                                                                                                                                                                           | 4.765520000  | -0.004938000 |              |              |   |              |              |             |   |              |              |              |   |              |              |              |   |              |              |              |   |              |              |              |   |              |             |              |   |             |              |              |   |              |             |              |   |              |              |             |   |              |             |              |   |              |              |              |   |              |              |              |   |              |              |              |   |              |              |              |   |              |              |              |   |              |              |              |   |              |              |              |   |              |              |              |   |              |              |              |   |             |             |             |   |             |              |              |   |              |             |             |   |              |             |             |   |              |             |             |   |              |              |             |   |              |             |             |   |              |             |              |   |              |             |              |   |             |             |              |   |              |             |              |   |              |             |              |   |             |             |              |   |             |             |             |   |             |             |              |   |             |             |              |   |             |              |             |
| C                                                                                                                                                         | 3.039476000                                                                                                                                                                                                                                                                                                                                                                                                                                                                                                                                                                                                                                                                                                                                                                                                                                                                                                                                                                                                                                                                                                                                                                                                                                                                                                                                                                                                                                                                                                                                                                                                                                                                                                                                                                                                                                                                                                                                                                                                                                                                                                                                                                                                                                                                                                                                                                                                                                                                                                                                                                                                                                                                                                                                                                                                                                                                                                                                                                                                                                                                                                                                                                            | 2.205585000  | -0.000341000 |              |              |   |              |              |             |   |              |              |              |   |              |              |              |   |              |              |              |   |              |              |              |   |              |             |              |   |             |              |              |   |              |             |              |   |              |              |             |   |              |             |              |   |              |              |              |   |              |              |              |   |              |              |              |   |              |              |              |   |              |              |              |   |              |              |              |   |              |              |              |   |              |              |              |   |              |              |              |   |             |             |             |   |             |              |              |   |              |             |             |   |              |             |             |   |              |             |             |   |              |              |             |   |              |             |             |   |              |             |              |   |              |             |              |   |             |             |              |   |              |             |              |   |              |             |              |   |             |             |              |   |             |             |             |   |             |             |              |   |             |             |              |   |             |              |             |
| H                                                                                                                                                         | 4.084093000                                                                                                                                                                                                                                                                                                                                                                                                                                                                                                                                                                                                                                                                                                                                                                                                                                                                                                                                                                                                                                                                                                                                                                                                                                                                                                                                                                                                                                                                                                                                                                                                                                                                                                                                                                                                                                                                                                                                                                                                                                                                                                                                                                                                                                                                                                                                                                                                                                                                                                                                                                                                                                                                                                                                                                                                                                                                                                                                                                                                                                                                                                                                                                            | 2.498741000  | 0.000354000  |              |              |   |              |              |             |   |              |              |              |   |              |              |              |   |              |              |              |   |              |              |              |   |              |             |              |   |             |              |              |   |              |             |              |   |              |              |             |   |              |             |              |   |              |              |              |   |              |              |              |   |              |              |              |   |              |              |              |   |              |              |              |   |              |              |              |   |              |              |              |   |              |              |              |   |              |              |              |   |             |             |             |   |             |              |              |   |              |             |             |   |              |             |             |   |              |             |             |   |              |              |             |   |              |             |             |   |              |             |              |   |              |             |              |   |             |             |              |   |              |             |              |   |              |             |              |   |             |             |              |   |             |             |             |   |             |             |              |   |             |             |              |   |             |              |             |
| C                                                                                                                                                         | 2.058029000                                                                                                                                                                                                                                                                                                                                                                                                                                                                                                                                                                                                                                                                                                                                                                                                                                                                                                                                                                                                                                                                                                                                                                                                                                                                                                                                                                                                                                                                                                                                                                                                                                                                                                                                                                                                                                                                                                                                                                                                                                                                                                                                                                                                                                                                                                                                                                                                                                                                                                                                                                                                                                                                                                                                                                                                                                                                                                                                                                                                                                                                                                                                                                            | 3.136199000  | -0.000976000 |              |              |   |              |              |             |   |              |              |              |   |              |              |              |   |              |              |              |   |              |              |              |   |              |             |              |   |             |              |              |   |              |             |              |   |              |              |             |   |              |             |              |   |              |              |              |   |              |              |              |   |              |              |              |   |              |              |              |   |              |              |              |   |              |              |              |   |              |              |              |   |              |              |              |   |              |              |              |   |             |             |             |   |             |              |              |   |              |             |             |   |              |             |             |   |              |             |             |   |              |              |             |   |              |             |             |   |              |             |              |   |              |             |              |   |             |             |              |   |              |             |              |   |              |             |              |   |             |             |              |   |             |             |             |   |             |             |              |   |             |             |              |   |             |              |             |
| H                                                                                                                                                         | 2.300670000                                                                                                                                                                                                                                                                                                                                                                                                                                                                                                                                                                                                                                                                                                                                                                                                                                                                                                                                                                                                                                                                                                                                                                                                                                                                                                                                                                                                                                                                                                                                                                                                                                                                                                                                                                                                                                                                                                                                                                                                                                                                                                                                                                                                                                                                                                                                                                                                                                                                                                                                                                                                                                                                                                                                                                                                                                                                                                                                                                                                                                                                                                                                                                            | 4.193568000  | -0.003066000 |              |              |   |              |              |             |   |              |              |              |   |              |              |              |   |              |              |              |   |              |              |              |   |              |             |              |   |             |              |              |   |              |             |              |   |              |              |             |   |              |             |              |   |              |              |              |   |              |              |              |   |              |              |              |   |              |              |              |   |              |              |              |   |              |              |              |   |              |              |              |   |              |              |              |   |              |              |              |   |             |             |             |   |             |              |              |   |              |             |             |   |              |             |             |   |              |             |             |   |              |              |             |   |              |             |             |   |              |             |              |   |              |             |              |   |             |             |              |   |              |             |              |   |              |             |              |   |             |             |              |   |             |             |             |   |             |             |              |   |             |             |              |   |             |              |             |
| H                                                                                                                                                         | 3.936179000                                                                                                                                                                                                                                                                                                                                                                                                                                                                                                                                                                                                                                                                                                                                                                                                                                                                                                                                                                                                                                                                                                                                                                                                                                                                                                                                                                                                                                                                                                                                                                                                                                                                                                                                                                                                                                                                                                                                                                                                                                                                                                                                                                                                                                                                                                                                                                                                                                                                                                                                                                                                                                                                                                                                                                                                                                                                                                                                                                                                                                                                                                                                                                            | -2.037816000 | 0.865821000  |              |              |   |              |              |             |   |              |              |              |   |              |              |              |   |              |              |              |   |              |              |              |   |              |             |              |   |             |              |              |   |              |             |              |   |              |              |             |   |              |             |              |   |              |              |              |   |              |              |              |   |              |              |              |   |              |              |              |   |              |              |              |   |              |              |              |   |              |              |              |   |              |              |              |   |              |              |              |   |             |             |             |   |             |              |              |   |              |             |             |   |              |             |             |   |              |             |             |   |              |              |             |   |              |             |             |   |              |             |              |   |              |             |              |   |             |             |              |   |              |             |              |   |              |             |              |   |             |             |              |   |             |             |             |   |             |             |              |   |             |             |              |   |             |              |             |

|                                                                                                                                                              |                                                                                                                                                                                                                                                                                                                                                                                                                                                                                                                                                                                                                                                                                                                                                                                                                                                                                                                                                                                                                                                                                                                                                                                                                                                                                                                                                                                                                                                                                                                                                                                                                                                                                                                                                                                                                                                                                                                                                                                                                                                                                                                                                                                                                                                                                                                                                                                                                                                                                                                                                                                                                                                                                                                                                                                                                                                                                                                                                                                                                                                                                                                                                                                                                                                                                                                                                                                                                                              |              |              |              |              |   |              |              |             |   |              |              |              |   |              |              |              |   |              |              |              |   |              |              |              |   |              |             |             |   |              |              |              |   |              |             |              |   |              |             |              |   |              |             |              |   |              |             |              |   |              |             |              |   |              |              |              |   |              |              |              |   |              |              |              |   |              |              |              |   |              |              |              |   |             |              |             |   |              |              |              |   |              |             |              |   |              |             |             |   |             |              |             |   |             |              |             |   |             |             |             |   |             |              |             |   |             |              |             |   |             |             |             |   |             |             |             |   |             |             |             |   |             |             |             |   |             |             |             |   |              |             |              |   |              |             |              |   |             |             |              |   |             |             |             |   |              |             |              |   |              |              |             |   |              |             |             |   |              |              |             |
|--------------------------------------------------------------------------------------------------------------------------------------------------------------|----------------------------------------------------------------------------------------------------------------------------------------------------------------------------------------------------------------------------------------------------------------------------------------------------------------------------------------------------------------------------------------------------------------------------------------------------------------------------------------------------------------------------------------------------------------------------------------------------------------------------------------------------------------------------------------------------------------------------------------------------------------------------------------------------------------------------------------------------------------------------------------------------------------------------------------------------------------------------------------------------------------------------------------------------------------------------------------------------------------------------------------------------------------------------------------------------------------------------------------------------------------------------------------------------------------------------------------------------------------------------------------------------------------------------------------------------------------------------------------------------------------------------------------------------------------------------------------------------------------------------------------------------------------------------------------------------------------------------------------------------------------------------------------------------------------------------------------------------------------------------------------------------------------------------------------------------------------------------------------------------------------------------------------------------------------------------------------------------------------------------------------------------------------------------------------------------------------------------------------------------------------------------------------------------------------------------------------------------------------------------------------------------------------------------------------------------------------------------------------------------------------------------------------------------------------------------------------------------------------------------------------------------------------------------------------------------------------------------------------------------------------------------------------------------------------------------------------------------------------------------------------------------------------------------------------------------------------------------------------------------------------------------------------------------------------------------------------------------------------------------------------------------------------------------------------------------------------------------------------------------------------------------------------------------------------------------------------------------------------------------------------------------------------------------------------------|--------------|--------------|--------------|--------------|---|--------------|--------------|-------------|---|--------------|--------------|--------------|---|--------------|--------------|--------------|---|--------------|--------------|--------------|---|--------------|--------------|--------------|---|--------------|-------------|-------------|---|--------------|--------------|--------------|---|--------------|-------------|--------------|---|--------------|-------------|--------------|---|--------------|-------------|--------------|---|--------------|-------------|--------------|---|--------------|-------------|--------------|---|--------------|--------------|--------------|---|--------------|--------------|--------------|---|--------------|--------------|--------------|---|--------------|--------------|--------------|---|--------------|--------------|--------------|---|-------------|--------------|-------------|---|--------------|--------------|--------------|---|--------------|-------------|--------------|---|--------------|-------------|-------------|---|-------------|--------------|-------------|---|-------------|--------------|-------------|---|-------------|-------------|-------------|---|-------------|--------------|-------------|---|-------------|--------------|-------------|---|-------------|-------------|-------------|---|-------------|-------------|-------------|---|-------------|-------------|-------------|---|-------------|-------------|-------------|---|-------------|-------------|-------------|---|--------------|-------------|--------------|---|--------------|-------------|--------------|---|-------------|-------------|--------------|---|-------------|-------------|-------------|---|--------------|-------------|--------------|---|--------------|--------------|-------------|---|--------------|-------------|-------------|---|--------------|--------------|-------------|
| 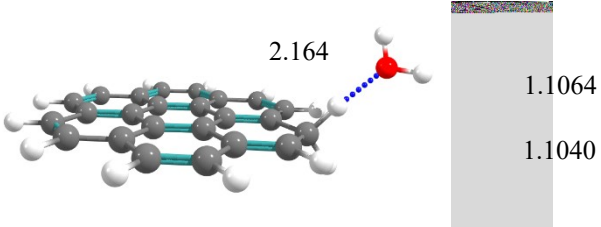 <p style="text-align: center;"><b>CorH<sup>+</sup>-W<sub>1</sub></b></p>   | <table border="1"> <tbody> <tr><td>C</td><td>1.302997000</td><td>-3.631019000</td><td>-0.005824000</td></tr> <tr><td>C</td><td>1.955847000</td><td>-2.371316000</td><td>0.054515000</td></tr> <tr><td>C</td><td>1.174690000</td><td>-1.191334000</td><td>-0.017965000</td></tr> <tr><td>C</td><td>-0.234047000</td><td>-1.278497000</td><td>-0.131822000</td></tr> <tr><td>C</td><td>-0.859686000</td><td>-2.544264000</td><td>-0.191151000</td></tr> <tr><td>C</td><td>-0.054316000</td><td>-3.715312000</td><td>-0.122443000</td></tr> <tr><td>C</td><td>1.798262000</td><td>0.075340000</td><td>0.054403000</td></tr> <tr><td>C</td><td>-1.018709000</td><td>-0.097727000</td><td>-0.214002000</td></tr> <tr><td>C</td><td>-0.385892000</td><td>1.175460000</td><td>-0.139246000</td></tr> <tr><td>C</td><td>1.015810000</td><td>1.261385000</td><td>-0.020729000</td></tr> <tr><td>C</td><td>-1.161307000</td><td>2.393511000</td><td>-0.206618000</td></tr> <tr><td>C</td><td>-2.517815000</td><td>2.311253000</td><td>-0.342425000</td></tr> <tr><td>C</td><td>-3.235967000</td><td>1.040780000</td><td>-0.426112000</td></tr> <tr><td>C</td><td>-2.419491000</td><td>-0.194732000</td><td>-0.335586000</td></tr> <tr><td>C</td><td>-3.025492000</td><td>-1.452755000</td><td>-0.371192000</td></tr> <tr><td>C</td><td>-2.261883000</td><td>-2.600638000</td><td>-0.303112000</td></tr> <tr><td>H</td><td>-2.746617000</td><td>-3.571735000</td><td>-0.335410000</td></tr> <tr><td>H</td><td>-4.106896000</td><td>-1.513733000</td><td>-0.434785000</td></tr> <tr><td>H</td><td>1.903735000</td><td>-4.533198000</td><td>0.045335000</td></tr> <tr><td>H</td><td>-0.539441000</td><td>-4.685257000</td><td>-0.165977000</td></tr> <tr><td>H</td><td>-3.103462000</td><td>3.225261000</td><td>-0.402189000</td></tr> <tr><td>H</td><td>-4.044100000</td><td>1.007598000</td><td>0.328833000</td></tr> <tr><td>C</td><td>3.363692000</td><td>-2.256905000</td><td>0.178441000</td></tr> <tr><td>C</td><td>3.967762000</td><td>-1.032298000</td><td>0.237770000</td></tr> <tr><td>C</td><td>3.203629000</td><td>0.162307000</td><td>0.175225000</td></tr> <tr><td>H</td><td>3.959458000</td><td>-3.162397000</td><td>0.228443000</td></tr> <tr><td>H</td><td>5.046342000</td><td>-0.959002000</td><td>0.333353000</td></tr> <tr><td>C</td><td>3.799345000</td><td>1.440697000</td><td>0.238763000</td></tr> <tr><td>C</td><td>3.047442000</td><td>2.592012000</td><td>0.180615000</td></tr> <tr><td>C</td><td>1.648890000</td><td>2.534717000</td><td>0.054489000</td></tr> <tr><td>H</td><td>4.878840000</td><td>1.508857000</td><td>0.335196000</td></tr> <tr><td>H</td><td>3.532910000</td><td>3.560664000</td><td>0.233738000</td></tr> <tr><td>C</td><td>-0.488658000</td><td>3.661114000</td><td>-0.131208000</td></tr> <tr><td>H</td><td>-1.086041000</td><td>4.565616000</td><td>-0.179244000</td></tr> <tr><td>C</td><td>0.857381000</td><td>3.725071000</td><td>-0.007586000</td></tr> <tr><td>H</td><td>1.361013000</td><td>4.684379000</td><td>0.047904000</td></tr> <tr><td>H</td><td>-3.816867000</td><td>1.037232000</td><td>-1.364923000</td></tr> <tr><td>O</td><td>-5.715244000</td><td>-0.103882000</td><td>1.138411000</td></tr> <tr><td>H</td><td>-6.635750000</td><td>0.099052000</td><td>0.954433000</td></tr> <tr><td>H</td><td>-5.716081000</td><td>-0.473389000</td><td>2.024809000</td></tr> </tbody> </table> | C            | 1.302997000  | -3.631019000 | -0.005824000 | C | 1.955847000  | -2.371316000 | 0.054515000 | C | 1.174690000  | -1.191334000 | -0.017965000 | C | -0.234047000 | -1.278497000 | -0.131822000 | C | -0.859686000 | -2.544264000 | -0.191151000 | C | -0.054316000 | -3.715312000 | -0.122443000 | C | 1.798262000  | 0.075340000 | 0.054403000 | C | -1.018709000 | -0.097727000 | -0.214002000 | C | -0.385892000 | 1.175460000 | -0.139246000 | C | 1.015810000  | 1.261385000 | -0.020729000 | C | -1.161307000 | 2.393511000 | -0.206618000 | C | -2.517815000 | 2.311253000 | -0.342425000 | C | -3.235967000 | 1.040780000 | -0.426112000 | C | -2.419491000 | -0.194732000 | -0.335586000 | C | -3.025492000 | -1.452755000 | -0.371192000 | C | -2.261883000 | -2.600638000 | -0.303112000 | H | -2.746617000 | -3.571735000 | -0.335410000 | H | -4.106896000 | -1.513733000 | -0.434785000 | H | 1.903735000 | -4.533198000 | 0.045335000 | H | -0.539441000 | -4.685257000 | -0.165977000 | H | -3.103462000 | 3.225261000 | -0.402189000 | H | -4.044100000 | 1.007598000 | 0.328833000 | C | 3.363692000 | -2.256905000 | 0.178441000 | C | 3.967762000 | -1.032298000 | 0.237770000 | C | 3.203629000 | 0.162307000 | 0.175225000 | H | 3.959458000 | -3.162397000 | 0.228443000 | H | 5.046342000 | -0.959002000 | 0.333353000 | C | 3.799345000 | 1.440697000 | 0.238763000 | C | 3.047442000 | 2.592012000 | 0.180615000 | C | 1.648890000 | 2.534717000 | 0.054489000 | H | 4.878840000 | 1.508857000 | 0.335196000 | H | 3.532910000 | 3.560664000 | 0.233738000 | C | -0.488658000 | 3.661114000 | -0.131208000 | H | -1.086041000 | 4.565616000 | -0.179244000 | C | 0.857381000 | 3.725071000 | -0.007586000 | H | 1.361013000 | 4.684379000 | 0.047904000 | H | -3.816867000 | 1.037232000 | -1.364923000 | O | -5.715244000 | -0.103882000 | 1.138411000 | H | -6.635750000 | 0.099052000 | 0.954433000 | H | -5.716081000 | -0.473389000 | 2.024809000 |
| C                                                                                                                                                            | 1.302997000                                                                                                                                                                                                                                                                                                                                                                                                                                                                                                                                                                                                                                                                                                                                                                                                                                                                                                                                                                                                                                                                                                                                                                                                                                                                                                                                                                                                                                                                                                                                                                                                                                                                                                                                                                                                                                                                                                                                                                                                                                                                                                                                                                                                                                                                                                                                                                                                                                                                                                                                                                                                                                                                                                                                                                                                                                                                                                                                                                                                                                                                                                                                                                                                                                                                                                                                                                                                                                  | -3.631019000 | -0.005824000 |              |              |   |              |              |             |   |              |              |              |   |              |              |              |   |              |              |              |   |              |              |              |   |              |             |             |   |              |              |              |   |              |             |              |   |              |             |              |   |              |             |              |   |              |             |              |   |              |             |              |   |              |              |              |   |              |              |              |   |              |              |              |   |              |              |              |   |              |              |              |   |             |              |             |   |              |              |              |   |              |             |              |   |              |             |             |   |             |              |             |   |             |              |             |   |             |             |             |   |             |              |             |   |             |              |             |   |             |             |             |   |             |             |             |   |             |             |             |   |             |             |             |   |             |             |             |   |              |             |              |   |              |             |              |   |             |             |              |   |             |             |             |   |              |             |              |   |              |              |             |   |              |             |             |   |              |              |             |
| C                                                                                                                                                            | 1.955847000                                                                                                                                                                                                                                                                                                                                                                                                                                                                                                                                                                                                                                                                                                                                                                                                                                                                                                                                                                                                                                                                                                                                                                                                                                                                                                                                                                                                                                                                                                                                                                                                                                                                                                                                                                                                                                                                                                                                                                                                                                                                                                                                                                                                                                                                                                                                                                                                                                                                                                                                                                                                                                                                                                                                                                                                                                                                                                                                                                                                                                                                                                                                                                                                                                                                                                                                                                                                                                  | -2.371316000 | 0.054515000  |              |              |   |              |              |             |   |              |              |              |   |              |              |              |   |              |              |              |   |              |              |              |   |              |             |             |   |              |              |              |   |              |             |              |   |              |             |              |   |              |             |              |   |              |             |              |   |              |             |              |   |              |              |              |   |              |              |              |   |              |              |              |   |              |              |              |   |              |              |              |   |             |              |             |   |              |              |              |   |              |             |              |   |              |             |             |   |             |              |             |   |             |              |             |   |             |             |             |   |             |              |             |   |             |              |             |   |             |             |             |   |             |             |             |   |             |             |             |   |             |             |             |   |             |             |             |   |              |             |              |   |              |             |              |   |             |             |              |   |             |             |             |   |              |             |              |   |              |              |             |   |              |             |             |   |              |              |             |
| C                                                                                                                                                            | 1.174690000                                                                                                                                                                                                                                                                                                                                                                                                                                                                                                                                                                                                                                                                                                                                                                                                                                                                                                                                                                                                                                                                                                                                                                                                                                                                                                                                                                                                                                                                                                                                                                                                                                                                                                                                                                                                                                                                                                                                                                                                                                                                                                                                                                                                                                                                                                                                                                                                                                                                                                                                                                                                                                                                                                                                                                                                                                                                                                                                                                                                                                                                                                                                                                                                                                                                                                                                                                                                                                  | -1.191334000 | -0.017965000 |              |              |   |              |              |             |   |              |              |              |   |              |              |              |   |              |              |              |   |              |              |              |   |              |             |             |   |              |              |              |   |              |             |              |   |              |             |              |   |              |             |              |   |              |             |              |   |              |             |              |   |              |              |              |   |              |              |              |   |              |              |              |   |              |              |              |   |              |              |              |   |             |              |             |   |              |              |              |   |              |             |              |   |              |             |             |   |             |              |             |   |             |              |             |   |             |             |             |   |             |              |             |   |             |              |             |   |             |             |             |   |             |             |             |   |             |             |             |   |             |             |             |   |             |             |             |   |              |             |              |   |              |             |              |   |             |             |              |   |             |             |             |   |              |             |              |   |              |              |             |   |              |             |             |   |              |              |             |
| C                                                                                                                                                            | -0.234047000                                                                                                                                                                                                                                                                                                                                                                                                                                                                                                                                                                                                                                                                                                                                                                                                                                                                                                                                                                                                                                                                                                                                                                                                                                                                                                                                                                                                                                                                                                                                                                                                                                                                                                                                                                                                                                                                                                                                                                                                                                                                                                                                                                                                                                                                                                                                                                                                                                                                                                                                                                                                                                                                                                                                                                                                                                                                                                                                                                                                                                                                                                                                                                                                                                                                                                                                                                                                                                 | -1.278497000 | -0.131822000 |              |              |   |              |              |             |   |              |              |              |   |              |              |              |   |              |              |              |   |              |              |              |   |              |             |             |   |              |              |              |   |              |             |              |   |              |             |              |   |              |             |              |   |              |             |              |   |              |             |              |   |              |              |              |   |              |              |              |   |              |              |              |   |              |              |              |   |              |              |              |   |             |              |             |   |              |              |              |   |              |             |              |   |              |             |             |   |             |              |             |   |             |              |             |   |             |             |             |   |             |              |             |   |             |              |             |   |             |             |             |   |             |             |             |   |             |             |             |   |             |             |             |   |             |             |             |   |              |             |              |   |              |             |              |   |             |             |              |   |             |             |             |   |              |             |              |   |              |              |             |   |              |             |             |   |              |              |             |
| C                                                                                                                                                            | -0.859686000                                                                                                                                                                                                                                                                                                                                                                                                                                                                                                                                                                                                                                                                                                                                                                                                                                                                                                                                                                                                                                                                                                                                                                                                                                                                                                                                                                                                                                                                                                                                                                                                                                                                                                                                                                                                                                                                                                                                                                                                                                                                                                                                                                                                                                                                                                                                                                                                                                                                                                                                                                                                                                                                                                                                                                                                                                                                                                                                                                                                                                                                                                                                                                                                                                                                                                                                                                                                                                 | -2.544264000 | -0.191151000 |              |              |   |              |              |             |   |              |              |              |   |              |              |              |   |              |              |              |   |              |              |              |   |              |             |             |   |              |              |              |   |              |             |              |   |              |             |              |   |              |             |              |   |              |             |              |   |              |             |              |   |              |              |              |   |              |              |              |   |              |              |              |   |              |              |              |   |              |              |              |   |             |              |             |   |              |              |              |   |              |             |              |   |              |             |             |   |             |              |             |   |             |              |             |   |             |             |             |   |             |              |             |   |             |              |             |   |             |             |             |   |             |             |             |   |             |             |             |   |             |             |             |   |             |             |             |   |              |             |              |   |              |             |              |   |             |             |              |   |             |             |             |   |              |             |              |   |              |              |             |   |              |             |             |   |              |              |             |
| C                                                                                                                                                            | -0.054316000                                                                                                                                                                                                                                                                                                                                                                                                                                                                                                                                                                                                                                                                                                                                                                                                                                                                                                                                                                                                                                                                                                                                                                                                                                                                                                                                                                                                                                                                                                                                                                                                                                                                                                                                                                                                                                                                                                                                                                                                                                                                                                                                                                                                                                                                                                                                                                                                                                                                                                                                                                                                                                                                                                                                                                                                                                                                                                                                                                                                                                                                                                                                                                                                                                                                                                                                                                                                                                 | -3.715312000 | -0.122443000 |              |              |   |              |              |             |   |              |              |              |   |              |              |              |   |              |              |              |   |              |              |              |   |              |             |             |   |              |              |              |   |              |             |              |   |              |             |              |   |              |             |              |   |              |             |              |   |              |             |              |   |              |              |              |   |              |              |              |   |              |              |              |   |              |              |              |   |              |              |              |   |             |              |             |   |              |              |              |   |              |             |              |   |              |             |             |   |             |              |             |   |             |              |             |   |             |             |             |   |             |              |             |   |             |              |             |   |             |             |             |   |             |             |             |   |             |             |             |   |             |             |             |   |             |             |             |   |              |             |              |   |              |             |              |   |             |             |              |   |             |             |             |   |              |             |              |   |              |              |             |   |              |             |             |   |              |              |             |
| C                                                                                                                                                            | 1.798262000                                                                                                                                                                                                                                                                                                                                                                                                                                                                                                                                                                                                                                                                                                                                                                                                                                                                                                                                                                                                                                                                                                                                                                                                                                                                                                                                                                                                                                                                                                                                                                                                                                                                                                                                                                                                                                                                                                                                                                                                                                                                                                                                                                                                                                                                                                                                                                                                                                                                                                                                                                                                                                                                                                                                                                                                                                                                                                                                                                                                                                                                                                                                                                                                                                                                                                                                                                                                                                  | 0.075340000  | 0.054403000  |              |              |   |              |              |             |   |              |              |              |   |              |              |              |   |              |              |              |   |              |              |              |   |              |             |             |   |              |              |              |   |              |             |              |   |              |             |              |   |              |             |              |   |              |             |              |   |              |             |              |   |              |              |              |   |              |              |              |   |              |              |              |   |              |              |              |   |              |              |              |   |             |              |             |   |              |              |              |   |              |             |              |   |              |             |             |   |             |              |             |   |             |              |             |   |             |             |             |   |             |              |             |   |             |              |             |   |             |             |             |   |             |             |             |   |             |             |             |   |             |             |             |   |             |             |             |   |              |             |              |   |              |             |              |   |             |             |              |   |             |             |             |   |              |             |              |   |              |              |             |   |              |             |             |   |              |              |             |
| C                                                                                                                                                            | -1.018709000                                                                                                                                                                                                                                                                                                                                                                                                                                                                                                                                                                                                                                                                                                                                                                                                                                                                                                                                                                                                                                                                                                                                                                                                                                                                                                                                                                                                                                                                                                                                                                                                                                                                                                                                                                                                                                                                                                                                                                                                                                                                                                                                                                                                                                                                                                                                                                                                                                                                                                                                                                                                                                                                                                                                                                                                                                                                                                                                                                                                                                                                                                                                                                                                                                                                                                                                                                                                                                 | -0.097727000 | -0.214002000 |              |              |   |              |              |             |   |              |              |              |   |              |              |              |   |              |              |              |   |              |              |              |   |              |             |             |   |              |              |              |   |              |             |              |   |              |             |              |   |              |             |              |   |              |             |              |   |              |             |              |   |              |              |              |   |              |              |              |   |              |              |              |   |              |              |              |   |              |              |              |   |             |              |             |   |              |              |              |   |              |             |              |   |              |             |             |   |             |              |             |   |             |              |             |   |             |             |             |   |             |              |             |   |             |              |             |   |             |             |             |   |             |             |             |   |             |             |             |   |             |             |             |   |             |             |             |   |              |             |              |   |              |             |              |   |             |             |              |   |             |             |             |   |              |             |              |   |              |              |             |   |              |             |             |   |              |              |             |
| C                                                                                                                                                            | -0.385892000                                                                                                                                                                                                                                                                                                                                                                                                                                                                                                                                                                                                                                                                                                                                                                                                                                                                                                                                                                                                                                                                                                                                                                                                                                                                                                                                                                                                                                                                                                                                                                                                                                                                                                                                                                                                                                                                                                                                                                                                                                                                                                                                                                                                                                                                                                                                                                                                                                                                                                                                                                                                                                                                                                                                                                                                                                                                                                                                                                                                                                                                                                                                                                                                                                                                                                                                                                                                                                 | 1.175460000  | -0.139246000 |              |              |   |              |              |             |   |              |              |              |   |              |              |              |   |              |              |              |   |              |              |              |   |              |             |             |   |              |              |              |   |              |             |              |   |              |             |              |   |              |             |              |   |              |             |              |   |              |             |              |   |              |              |              |   |              |              |              |   |              |              |              |   |              |              |              |   |              |              |              |   |             |              |             |   |              |              |              |   |              |             |              |   |              |             |             |   |             |              |             |   |             |              |             |   |             |             |             |   |             |              |             |   |             |              |             |   |             |             |             |   |             |             |             |   |             |             |             |   |             |             |             |   |             |             |             |   |              |             |              |   |              |             |              |   |             |             |              |   |             |             |             |   |              |             |              |   |              |              |             |   |              |             |             |   |              |              |             |
| C                                                                                                                                                            | 1.015810000                                                                                                                                                                                                                                                                                                                                                                                                                                                                                                                                                                                                                                                                                                                                                                                                                                                                                                                                                                                                                                                                                                                                                                                                                                                                                                                                                                                                                                                                                                                                                                                                                                                                                                                                                                                                                                                                                                                                                                                                                                                                                                                                                                                                                                                                                                                                                                                                                                                                                                                                                                                                                                                                                                                                                                                                                                                                                                                                                                                                                                                                                                                                                                                                                                                                                                                                                                                                                                  | 1.261385000  | -0.020729000 |              |              |   |              |              |             |   |              |              |              |   |              |              |              |   |              |              |              |   |              |              |              |   |              |             |             |   |              |              |              |   |              |             |              |   |              |             |              |   |              |             |              |   |              |             |              |   |              |             |              |   |              |              |              |   |              |              |              |   |              |              |              |   |              |              |              |   |              |              |              |   |             |              |             |   |              |              |              |   |              |             |              |   |              |             |             |   |             |              |             |   |             |              |             |   |             |             |             |   |             |              |             |   |             |              |             |   |             |             |             |   |             |             |             |   |             |             |             |   |             |             |             |   |             |             |             |   |              |             |              |   |              |             |              |   |             |             |              |   |             |             |             |   |              |             |              |   |              |              |             |   |              |             |             |   |              |              |             |
| C                                                                                                                                                            | -1.161307000                                                                                                                                                                                                                                                                                                                                                                                                                                                                                                                                                                                                                                                                                                                                                                                                                                                                                                                                                                                                                                                                                                                                                                                                                                                                                                                                                                                                                                                                                                                                                                                                                                                                                                                                                                                                                                                                                                                                                                                                                                                                                                                                                                                                                                                                                                                                                                                                                                                                                                                                                                                                                                                                                                                                                                                                                                                                                                                                                                                                                                                                                                                                                                                                                                                                                                                                                                                                                                 | 2.393511000  | -0.206618000 |              |              |   |              |              |             |   |              |              |              |   |              |              |              |   |              |              |              |   |              |              |              |   |              |             |             |   |              |              |              |   |              |             |              |   |              |             |              |   |              |             |              |   |              |             |              |   |              |             |              |   |              |              |              |   |              |              |              |   |              |              |              |   |              |              |              |   |              |              |              |   |             |              |             |   |              |              |              |   |              |             |              |   |              |             |             |   |             |              |             |   |             |              |             |   |             |             |             |   |             |              |             |   |             |              |             |   |             |             |             |   |             |             |             |   |             |             |             |   |             |             |             |   |             |             |             |   |              |             |              |   |              |             |              |   |             |             |              |   |             |             |             |   |              |             |              |   |              |              |             |   |              |             |             |   |              |              |             |
| C                                                                                                                                                            | -2.517815000                                                                                                                                                                                                                                                                                                                                                                                                                                                                                                                                                                                                                                                                                                                                                                                                                                                                                                                                                                                                                                                                                                                                                                                                                                                                                                                                                                                                                                                                                                                                                                                                                                                                                                                                                                                                                                                                                                                                                                                                                                                                                                                                                                                                                                                                                                                                                                                                                                                                                                                                                                                                                                                                                                                                                                                                                                                                                                                                                                                                                                                                                                                                                                                                                                                                                                                                                                                                                                 | 2.311253000  | -0.342425000 |              |              |   |              |              |             |   |              |              |              |   |              |              |              |   |              |              |              |   |              |              |              |   |              |             |             |   |              |              |              |   |              |             |              |   |              |             |              |   |              |             |              |   |              |             |              |   |              |             |              |   |              |              |              |   |              |              |              |   |              |              |              |   |              |              |              |   |              |              |              |   |             |              |             |   |              |              |              |   |              |             |              |   |              |             |             |   |             |              |             |   |             |              |             |   |             |             |             |   |             |              |             |   |             |              |             |   |             |             |             |   |             |             |             |   |             |             |             |   |             |             |             |   |             |             |             |   |              |             |              |   |              |             |              |   |             |             |              |   |             |             |             |   |              |             |              |   |              |              |             |   |              |             |             |   |              |              |             |
| C                                                                                                                                                            | -3.235967000                                                                                                                                                                                                                                                                                                                                                                                                                                                                                                                                                                                                                                                                                                                                                                                                                                                                                                                                                                                                                                                                                                                                                                                                                                                                                                                                                                                                                                                                                                                                                                                                                                                                                                                                                                                                                                                                                                                                                                                                                                                                                                                                                                                                                                                                                                                                                                                                                                                                                                                                                                                                                                                                                                                                                                                                                                                                                                                                                                                                                                                                                                                                                                                                                                                                                                                                                                                                                                 | 1.040780000  | -0.426112000 |              |              |   |              |              |             |   |              |              |              |   |              |              |              |   |              |              |              |   |              |              |              |   |              |             |             |   |              |              |              |   |              |             |              |   |              |             |              |   |              |             |              |   |              |             |              |   |              |             |              |   |              |              |              |   |              |              |              |   |              |              |              |   |              |              |              |   |              |              |              |   |             |              |             |   |              |              |              |   |              |             |              |   |              |             |             |   |             |              |             |   |             |              |             |   |             |             |             |   |             |              |             |   |             |              |             |   |             |             |             |   |             |             |             |   |             |             |             |   |             |             |             |   |             |             |             |   |              |             |              |   |              |             |              |   |             |             |              |   |             |             |             |   |              |             |              |   |              |              |             |   |              |             |             |   |              |              |             |
| C                                                                                                                                                            | -2.419491000                                                                                                                                                                                                                                                                                                                                                                                                                                                                                                                                                                                                                                                                                                                                                                                                                                                                                                                                                                                                                                                                                                                                                                                                                                                                                                                                                                                                                                                                                                                                                                                                                                                                                                                                                                                                                                                                                                                                                                                                                                                                                                                                                                                                                                                                                                                                                                                                                                                                                                                                                                                                                                                                                                                                                                                                                                                                                                                                                                                                                                                                                                                                                                                                                                                                                                                                                                                                                                 | -0.194732000 | -0.335586000 |              |              |   |              |              |             |   |              |              |              |   |              |              |              |   |              |              |              |   |              |              |              |   |              |             |             |   |              |              |              |   |              |             |              |   |              |             |              |   |              |             |              |   |              |             |              |   |              |             |              |   |              |              |              |   |              |              |              |   |              |              |              |   |              |              |              |   |              |              |              |   |             |              |             |   |              |              |              |   |              |             |              |   |              |             |             |   |             |              |             |   |             |              |             |   |             |             |             |   |             |              |             |   |             |              |             |   |             |             |             |   |             |             |             |   |             |             |             |   |             |             |             |   |             |             |             |   |              |             |              |   |              |             |              |   |             |             |              |   |             |             |             |   |              |             |              |   |              |              |             |   |              |             |             |   |              |              |             |
| C                                                                                                                                                            | -3.025492000                                                                                                                                                                                                                                                                                                                                                                                                                                                                                                                                                                                                                                                                                                                                                                                                                                                                                                                                                                                                                                                                                                                                                                                                                                                                                                                                                                                                                                                                                                                                                                                                                                                                                                                                                                                                                                                                                                                                                                                                                                                                                                                                                                                                                                                                                                                                                                                                                                                                                                                                                                                                                                                                                                                                                                                                                                                                                                                                                                                                                                                                                                                                                                                                                                                                                                                                                                                                                                 | -1.452755000 | -0.371192000 |              |              |   |              |              |             |   |              |              |              |   |              |              |              |   |              |              |              |   |              |              |              |   |              |             |             |   |              |              |              |   |              |             |              |   |              |             |              |   |              |             |              |   |              |             |              |   |              |             |              |   |              |              |              |   |              |              |              |   |              |              |              |   |              |              |              |   |              |              |              |   |             |              |             |   |              |              |              |   |              |             |              |   |              |             |             |   |             |              |             |   |             |              |             |   |             |             |             |   |             |              |             |   |             |              |             |   |             |             |             |   |             |             |             |   |             |             |             |   |             |             |             |   |             |             |             |   |              |             |              |   |              |             |              |   |             |             |              |   |             |             |             |   |              |             |              |   |              |              |             |   |              |             |             |   |              |              |             |
| C                                                                                                                                                            | -2.261883000                                                                                                                                                                                                                                                                                                                                                                                                                                                                                                                                                                                                                                                                                                                                                                                                                                                                                                                                                                                                                                                                                                                                                                                                                                                                                                                                                                                                                                                                                                                                                                                                                                                                                                                                                                                                                                                                                                                                                                                                                                                                                                                                                                                                                                                                                                                                                                                                                                                                                                                                                                                                                                                                                                                                                                                                                                                                                                                                                                                                                                                                                                                                                                                                                                                                                                                                                                                                                                 | -2.600638000 | -0.303112000 |              |              |   |              |              |             |   |              |              |              |   |              |              |              |   |              |              |              |   |              |              |              |   |              |             |             |   |              |              |              |   |              |             |              |   |              |             |              |   |              |             |              |   |              |             |              |   |              |             |              |   |              |              |              |   |              |              |              |   |              |              |              |   |              |              |              |   |              |              |              |   |             |              |             |   |              |              |              |   |              |             |              |   |              |             |             |   |             |              |             |   |             |              |             |   |             |             |             |   |             |              |             |   |             |              |             |   |             |             |             |   |             |             |             |   |             |             |             |   |             |             |             |   |             |             |             |   |              |             |              |   |              |             |              |   |             |             |              |   |             |             |             |   |              |             |              |   |              |              |             |   |              |             |             |   |              |              |             |
| H                                                                                                                                                            | -2.746617000                                                                                                                                                                                                                                                                                                                                                                                                                                                                                                                                                                                                                                                                                                                                                                                                                                                                                                                                                                                                                                                                                                                                                                                                                                                                                                                                                                                                                                                                                                                                                                                                                                                                                                                                                                                                                                                                                                                                                                                                                                                                                                                                                                                                                                                                                                                                                                                                                                                                                                                                                                                                                                                                                                                                                                                                                                                                                                                                                                                                                                                                                                                                                                                                                                                                                                                                                                                                                                 | -3.571735000 | -0.335410000 |              |              |   |              |              |             |   |              |              |              |   |              |              |              |   |              |              |              |   |              |              |              |   |              |             |             |   |              |              |              |   |              |             |              |   |              |             |              |   |              |             |              |   |              |             |              |   |              |             |              |   |              |              |              |   |              |              |              |   |              |              |              |   |              |              |              |   |              |              |              |   |             |              |             |   |              |              |              |   |              |             |              |   |              |             |             |   |             |              |             |   |             |              |             |   |             |             |             |   |             |              |             |   |             |              |             |   |             |             |             |   |             |             |             |   |             |             |             |   |             |             |             |   |             |             |             |   |              |             |              |   |              |             |              |   |             |             |              |   |             |             |             |   |              |             |              |   |              |              |             |   |              |             |             |   |              |              |             |
| H                                                                                                                                                            | -4.106896000                                                                                                                                                                                                                                                                                                                                                                                                                                                                                                                                                                                                                                                                                                                                                                                                                                                                                                                                                                                                                                                                                                                                                                                                                                                                                                                                                                                                                                                                                                                                                                                                                                                                                                                                                                                                                                                                                                                                                                                                                                                                                                                                                                                                                                                                                                                                                                                                                                                                                                                                                                                                                                                                                                                                                                                                                                                                                                                                                                                                                                                                                                                                                                                                                                                                                                                                                                                                                                 | -1.513733000 | -0.434785000 |              |              |   |              |              |             |   |              |              |              |   |              |              |              |   |              |              |              |   |              |              |              |   |              |             |             |   |              |              |              |   |              |             |              |   |              |             |              |   |              |             |              |   |              |             |              |   |              |             |              |   |              |              |              |   |              |              |              |   |              |              |              |   |              |              |              |   |              |              |              |   |             |              |             |   |              |              |              |   |              |             |              |   |              |             |             |   |             |              |             |   |             |              |             |   |             |             |             |   |             |              |             |   |             |              |             |   |             |             |             |   |             |             |             |   |             |             |             |   |             |             |             |   |             |             |             |   |              |             |              |   |              |             |              |   |             |             |              |   |             |             |             |   |              |             |              |   |              |              |             |   |              |             |             |   |              |              |             |
| H                                                                                                                                                            | 1.903735000                                                                                                                                                                                                                                                                                                                                                                                                                                                                                                                                                                                                                                                                                                                                                                                                                                                                                                                                                                                                                                                                                                                                                                                                                                                                                                                                                                                                                                                                                                                                                                                                                                                                                                                                                                                                                                                                                                                                                                                                                                                                                                                                                                                                                                                                                                                                                                                                                                                                                                                                                                                                                                                                                                                                                                                                                                                                                                                                                                                                                                                                                                                                                                                                                                                                                                                                                                                                                                  | -4.533198000 | 0.045335000  |              |              |   |              |              |             |   |              |              |              |   |              |              |              |   |              |              |              |   |              |              |              |   |              |             |             |   |              |              |              |   |              |             |              |   |              |             |              |   |              |             |              |   |              |             |              |   |              |             |              |   |              |              |              |   |              |              |              |   |              |              |              |   |              |              |              |   |              |              |              |   |             |              |             |   |              |              |              |   |              |             |              |   |              |             |             |   |             |              |             |   |             |              |             |   |             |             |             |   |             |              |             |   |             |              |             |   |             |             |             |   |             |             |             |   |             |             |             |   |             |             |             |   |             |             |             |   |              |             |              |   |              |             |              |   |             |             |              |   |             |             |             |   |              |             |              |   |              |              |             |   |              |             |             |   |              |              |             |
| H                                                                                                                                                            | -0.539441000                                                                                                                                                                                                                                                                                                                                                                                                                                                                                                                                                                                                                                                                                                                                                                                                                                                                                                                                                                                                                                                                                                                                                                                                                                                                                                                                                                                                                                                                                                                                                                                                                                                                                                                                                                                                                                                                                                                                                                                                                                                                                                                                                                                                                                                                                                                                                                                                                                                                                                                                                                                                                                                                                                                                                                                                                                                                                                                                                                                                                                                                                                                                                                                                                                                                                                                                                                                                                                 | -4.685257000 | -0.165977000 |              |              |   |              |              |             |   |              |              |              |   |              |              |              |   |              |              |              |   |              |              |              |   |              |             |             |   |              |              |              |   |              |             |              |   |              |             |              |   |              |             |              |   |              |             |              |   |              |             |              |   |              |              |              |   |              |              |              |   |              |              |              |   |              |              |              |   |              |              |              |   |             |              |             |   |              |              |              |   |              |             |              |   |              |             |             |   |             |              |             |   |             |              |             |   |             |             |             |   |             |              |             |   |             |              |             |   |             |             |             |   |             |             |             |   |             |             |             |   |             |             |             |   |             |             |             |   |              |             |              |   |              |             |              |   |             |             |              |   |             |             |             |   |              |             |              |   |              |              |             |   |              |             |             |   |              |              |             |
| H                                                                                                                                                            | -3.103462000                                                                                                                                                                                                                                                                                                                                                                                                                                                                                                                                                                                                                                                                                                                                                                                                                                                                                                                                                                                                                                                                                                                                                                                                                                                                                                                                                                                                                                                                                                                                                                                                                                                                                                                                                                                                                                                                                                                                                                                                                                                                                                                                                                                                                                                                                                                                                                                                                                                                                                                                                                                                                                                                                                                                                                                                                                                                                                                                                                                                                                                                                                                                                                                                                                                                                                                                                                                                                                 | 3.225261000  | -0.402189000 |              |              |   |              |              |             |   |              |              |              |   |              |              |              |   |              |              |              |   |              |              |              |   |              |             |             |   |              |              |              |   |              |             |              |   |              |             |              |   |              |             |              |   |              |             |              |   |              |             |              |   |              |              |              |   |              |              |              |   |              |              |              |   |              |              |              |   |              |              |              |   |             |              |             |   |              |              |              |   |              |             |              |   |              |             |             |   |             |              |             |   |             |              |             |   |             |             |             |   |             |              |             |   |             |              |             |   |             |             |             |   |             |             |             |   |             |             |             |   |             |             |             |   |             |             |             |   |              |             |              |   |              |             |              |   |             |             |              |   |             |             |             |   |              |             |              |   |              |              |             |   |              |             |             |   |              |              |             |
| H                                                                                                                                                            | -4.044100000                                                                                                                                                                                                                                                                                                                                                                                                                                                                                                                                                                                                                                                                                                                                                                                                                                                                                                                                                                                                                                                                                                                                                                                                                                                                                                                                                                                                                                                                                                                                                                                                                                                                                                                                                                                                                                                                                                                                                                                                                                                                                                                                                                                                                                                                                                                                                                                                                                                                                                                                                                                                                                                                                                                                                                                                                                                                                                                                                                                                                                                                                                                                                                                                                                                                                                                                                                                                                                 | 1.007598000  | 0.328833000  |              |              |   |              |              |             |   |              |              |              |   |              |              |              |   |              |              |              |   |              |              |              |   |              |             |             |   |              |              |              |   |              |             |              |   |              |             |              |   |              |             |              |   |              |             |              |   |              |             |              |   |              |              |              |   |              |              |              |   |              |              |              |   |              |              |              |   |              |              |              |   |             |              |             |   |              |              |              |   |              |             |              |   |              |             |             |   |             |              |             |   |             |              |             |   |             |             |             |   |             |              |             |   |             |              |             |   |             |             |             |   |             |             |             |   |             |             |             |   |             |             |             |   |             |             |             |   |              |             |              |   |              |             |              |   |             |             |              |   |             |             |             |   |              |             |              |   |              |              |             |   |              |             |             |   |              |              |             |
| C                                                                                                                                                            | 3.363692000                                                                                                                                                                                                                                                                                                                                                                                                                                                                                                                                                                                                                                                                                                                                                                                                                                                                                                                                                                                                                                                                                                                                                                                                                                                                                                                                                                                                                                                                                                                                                                                                                                                                                                                                                                                                                                                                                                                                                                                                                                                                                                                                                                                                                                                                                                                                                                                                                                                                                                                                                                                                                                                                                                                                                                                                                                                                                                                                                                                                                                                                                                                                                                                                                                                                                                                                                                                                                                  | -2.256905000 | 0.178441000  |              |              |   |              |              |             |   |              |              |              |   |              |              |              |   |              |              |              |   |              |              |              |   |              |             |             |   |              |              |              |   |              |             |              |   |              |             |              |   |              |             |              |   |              |             |              |   |              |             |              |   |              |              |              |   |              |              |              |   |              |              |              |   |              |              |              |   |              |              |              |   |             |              |             |   |              |              |              |   |              |             |              |   |              |             |             |   |             |              |             |   |             |              |             |   |             |             |             |   |             |              |             |   |             |              |             |   |             |             |             |   |             |             |             |   |             |             |             |   |             |             |             |   |             |             |             |   |              |             |              |   |              |             |              |   |             |             |              |   |             |             |             |   |              |             |              |   |              |              |             |   |              |             |             |   |              |              |             |
| C                                                                                                                                                            | 3.967762000                                                                                                                                                                                                                                                                                                                                                                                                                                                                                                                                                                                                                                                                                                                                                                                                                                                                                                                                                                                                                                                                                                                                                                                                                                                                                                                                                                                                                                                                                                                                                                                                                                                                                                                                                                                                                                                                                                                                                                                                                                                                                                                                                                                                                                                                                                                                                                                                                                                                                                                                                                                                                                                                                                                                                                                                                                                                                                                                                                                                                                                                                                                                                                                                                                                                                                                                                                                                                                  | -1.032298000 | 0.237770000  |              |              |   |              |              |             |   |              |              |              |   |              |              |              |   |              |              |              |   |              |              |              |   |              |             |             |   |              |              |              |   |              |             |              |   |              |             |              |   |              |             |              |   |              |             |              |   |              |             |              |   |              |              |              |   |              |              |              |   |              |              |              |   |              |              |              |   |              |              |              |   |             |              |             |   |              |              |              |   |              |             |              |   |              |             |             |   |             |              |             |   |             |              |             |   |             |             |             |   |             |              |             |   |             |              |             |   |             |             |             |   |             |             |             |   |             |             |             |   |             |             |             |   |             |             |             |   |              |             |              |   |              |             |              |   |             |             |              |   |             |             |             |   |              |             |              |   |              |              |             |   |              |             |             |   |              |              |             |
| C                                                                                                                                                            | 3.203629000                                                                                                                                                                                                                                                                                                                                                                                                                                                                                                                                                                                                                                                                                                                                                                                                                                                                                                                                                                                                                                                                                                                                                                                                                                                                                                                                                                                                                                                                                                                                                                                                                                                                                                                                                                                                                                                                                                                                                                                                                                                                                                                                                                                                                                                                                                                                                                                                                                                                                                                                                                                                                                                                                                                                                                                                                                                                                                                                                                                                                                                                                                                                                                                                                                                                                                                                                                                                                                  | 0.162307000  | 0.175225000  |              |              |   |              |              |             |   |              |              |              |   |              |              |              |   |              |              |              |   |              |              |              |   |              |             |             |   |              |              |              |   |              |             |              |   |              |             |              |   |              |             |              |   |              |             |              |   |              |             |              |   |              |              |              |   |              |              |              |   |              |              |              |   |              |              |              |   |              |              |              |   |             |              |             |   |              |              |              |   |              |             |              |   |              |             |             |   |             |              |             |   |             |              |             |   |             |             |             |   |             |              |             |   |             |              |             |   |             |             |             |   |             |             |             |   |             |             |             |   |             |             |             |   |             |             |             |   |              |             |              |   |              |             |              |   |             |             |              |   |             |             |             |   |              |             |              |   |              |              |             |   |              |             |             |   |              |              |             |
| H                                                                                                                                                            | 3.959458000                                                                                                                                                                                                                                                                                                                                                                                                                                                                                                                                                                                                                                                                                                                                                                                                                                                                                                                                                                                                                                                                                                                                                                                                                                                                                                                                                                                                                                                                                                                                                                                                                                                                                                                                                                                                                                                                                                                                                                                                                                                                                                                                                                                                                                                                                                                                                                                                                                                                                                                                                                                                                                                                                                                                                                                                                                                                                                                                                                                                                                                                                                                                                                                                                                                                                                                                                                                                                                  | -3.162397000 | 0.228443000  |              |              |   |              |              |             |   |              |              |              |   |              |              |              |   |              |              |              |   |              |              |              |   |              |             |             |   |              |              |              |   |              |             |              |   |              |             |              |   |              |             |              |   |              |             |              |   |              |             |              |   |              |              |              |   |              |              |              |   |              |              |              |   |              |              |              |   |              |              |              |   |             |              |             |   |              |              |              |   |              |             |              |   |              |             |             |   |             |              |             |   |             |              |             |   |             |             |             |   |             |              |             |   |             |              |             |   |             |             |             |   |             |             |             |   |             |             |             |   |             |             |             |   |             |             |             |   |              |             |              |   |              |             |              |   |             |             |              |   |             |             |             |   |              |             |              |   |              |              |             |   |              |             |             |   |              |              |             |
| H                                                                                                                                                            | 5.046342000                                                                                                                                                                                                                                                                                                                                                                                                                                                                                                                                                                                                                                                                                                                                                                                                                                                                                                                                                                                                                                                                                                                                                                                                                                                                                                                                                                                                                                                                                                                                                                                                                                                                                                                                                                                                                                                                                                                                                                                                                                                                                                                                                                                                                                                                                                                                                                                                                                                                                                                                                                                                                                                                                                                                                                                                                                                                                                                                                                                                                                                                                                                                                                                                                                                                                                                                                                                                                                  | -0.959002000 | 0.333353000  |              |              |   |              |              |             |   |              |              |              |   |              |              |              |   |              |              |              |   |              |              |              |   |              |             |             |   |              |              |              |   |              |             |              |   |              |             |              |   |              |             |              |   |              |             |              |   |              |             |              |   |              |              |              |   |              |              |              |   |              |              |              |   |              |              |              |   |              |              |              |   |             |              |             |   |              |              |              |   |              |             |              |   |              |             |             |   |             |              |             |   |             |              |             |   |             |             |             |   |             |              |             |   |             |              |             |   |             |             |             |   |             |             |             |   |             |             |             |   |             |             |             |   |             |             |             |   |              |             |              |   |              |             |              |   |             |             |              |   |             |             |             |   |              |             |              |   |              |              |             |   |              |             |             |   |              |              |             |
| C                                                                                                                                                            | 3.799345000                                                                                                                                                                                                                                                                                                                                                                                                                                                                                                                                                                                                                                                                                                                                                                                                                                                                                                                                                                                                                                                                                                                                                                                                                                                                                                                                                                                                                                                                                                                                                                                                                                                                                                                                                                                                                                                                                                                                                                                                                                                                                                                                                                                                                                                                                                                                                                                                                                                                                                                                                                                                                                                                                                                                                                                                                                                                                                                                                                                                                                                                                                                                                                                                                                                                                                                                                                                                                                  | 1.440697000  | 0.238763000  |              |              |   |              |              |             |   |              |              |              |   |              |              |              |   |              |              |              |   |              |              |              |   |              |             |             |   |              |              |              |   |              |             |              |   |              |             |              |   |              |             |              |   |              |             |              |   |              |             |              |   |              |              |              |   |              |              |              |   |              |              |              |   |              |              |              |   |              |              |              |   |             |              |             |   |              |              |              |   |              |             |              |   |              |             |             |   |             |              |             |   |             |              |             |   |             |             |             |   |             |              |             |   |             |              |             |   |             |             |             |   |             |             |             |   |             |             |             |   |             |             |             |   |             |             |             |   |              |             |              |   |              |             |              |   |             |             |              |   |             |             |             |   |              |             |              |   |              |              |             |   |              |             |             |   |              |              |             |
| C                                                                                                                                                            | 3.047442000                                                                                                                                                                                                                                                                                                                                                                                                                                                                                                                                                                                                                                                                                                                                                                                                                                                                                                                                                                                                                                                                                                                                                                                                                                                                                                                                                                                                                                                                                                                                                                                                                                                                                                                                                                                                                                                                                                                                                                                                                                                                                                                                                                                                                                                                                                                                                                                                                                                                                                                                                                                                                                                                                                                                                                                                                                                                                                                                                                                                                                                                                                                                                                                                                                                                                                                                                                                                                                  | 2.592012000  | 0.180615000  |              |              |   |              |              |             |   |              |              |              |   |              |              |              |   |              |              |              |   |              |              |              |   |              |             |             |   |              |              |              |   |              |             |              |   |              |             |              |   |              |             |              |   |              |             |              |   |              |             |              |   |              |              |              |   |              |              |              |   |              |              |              |   |              |              |              |   |              |              |              |   |             |              |             |   |              |              |              |   |              |             |              |   |              |             |             |   |             |              |             |   |             |              |             |   |             |             |             |   |             |              |             |   |             |              |             |   |             |             |             |   |             |             |             |   |             |             |             |   |             |             |             |   |             |             |             |   |              |             |              |   |              |             |              |   |             |             |              |   |             |             |             |   |              |             |              |   |              |              |             |   |              |             |             |   |              |              |             |
| C                                                                                                                                                            | 1.648890000                                                                                                                                                                                                                                                                                                                                                                                                                                                                                                                                                                                                                                                                                                                                                                                                                                                                                                                                                                                                                                                                                                                                                                                                                                                                                                                                                                                                                                                                                                                                                                                                                                                                                                                                                                                                                                                                                                                                                                                                                                                                                                                                                                                                                                                                                                                                                                                                                                                                                                                                                                                                                                                                                                                                                                                                                                                                                                                                                                                                                                                                                                                                                                                                                                                                                                                                                                                                                                  | 2.534717000  | 0.054489000  |              |              |   |              |              |             |   |              |              |              |   |              |              |              |   |              |              |              |   |              |              |              |   |              |             |             |   |              |              |              |   |              |             |              |   |              |             |              |   |              |             |              |   |              |             |              |   |              |             |              |   |              |              |              |   |              |              |              |   |              |              |              |   |              |              |              |   |              |              |              |   |             |              |             |   |              |              |              |   |              |             |              |   |              |             |             |   |             |              |             |   |             |              |             |   |             |             |             |   |             |              |             |   |             |              |             |   |             |             |             |   |             |             |             |   |             |             |             |   |             |             |             |   |             |             |             |   |              |             |              |   |              |             |              |   |             |             |              |   |             |             |             |   |              |             |              |   |              |              |             |   |              |             |             |   |              |              |             |
| H                                                                                                                                                            | 4.878840000                                                                                                                                                                                                                                                                                                                                                                                                                                                                                                                                                                                                                                                                                                                                                                                                                                                                                                                                                                                                                                                                                                                                                                                                                                                                                                                                                                                                                                                                                                                                                                                                                                                                                                                                                                                                                                                                                                                                                                                                                                                                                                                                                                                                                                                                                                                                                                                                                                                                                                                                                                                                                                                                                                                                                                                                                                                                                                                                                                                                                                                                                                                                                                                                                                                                                                                                                                                                                                  | 1.508857000  | 0.335196000  |              |              |   |              |              |             |   |              |              |              |   |              |              |              |   |              |              |              |   |              |              |              |   |              |             |             |   |              |              |              |   |              |             |              |   |              |             |              |   |              |             |              |   |              |             |              |   |              |             |              |   |              |              |              |   |              |              |              |   |              |              |              |   |              |              |              |   |              |              |              |   |             |              |             |   |              |              |              |   |              |             |              |   |              |             |             |   |             |              |             |   |             |              |             |   |             |             |             |   |             |              |             |   |             |              |             |   |             |             |             |   |             |             |             |   |             |             |             |   |             |             |             |   |             |             |             |   |              |             |              |   |              |             |              |   |             |             |              |   |             |             |             |   |              |             |              |   |              |              |             |   |              |             |             |   |              |              |             |
| H                                                                                                                                                            | 3.532910000                                                                                                                                                                                                                                                                                                                                                                                                                                                                                                                                                                                                                                                                                                                                                                                                                                                                                                                                                                                                                                                                                                                                                                                                                                                                                                                                                                                                                                                                                                                                                                                                                                                                                                                                                                                                                                                                                                                                                                                                                                                                                                                                                                                                                                                                                                                                                                                                                                                                                                                                                                                                                                                                                                                                                                                                                                                                                                                                                                                                                                                                                                                                                                                                                                                                                                                                                                                                                                  | 3.560664000  | 0.233738000  |              |              |   |              |              |             |   |              |              |              |   |              |              |              |   |              |              |              |   |              |              |              |   |              |             |             |   |              |              |              |   |              |             |              |   |              |             |              |   |              |             |              |   |              |             |              |   |              |             |              |   |              |              |              |   |              |              |              |   |              |              |              |   |              |              |              |   |              |              |              |   |             |              |             |   |              |              |              |   |              |             |              |   |              |             |             |   |             |              |             |   |             |              |             |   |             |             |             |   |             |              |             |   |             |              |             |   |             |             |             |   |             |             |             |   |             |             |             |   |             |             |             |   |             |             |             |   |              |             |              |   |              |             |              |   |             |             |              |   |             |             |             |   |              |             |              |   |              |              |             |   |              |             |             |   |              |              |             |
| C                                                                                                                                                            | -0.488658000                                                                                                                                                                                                                                                                                                                                                                                                                                                                                                                                                                                                                                                                                                                                                                                                                                                                                                                                                                                                                                                                                                                                                                                                                                                                                                                                                                                                                                                                                                                                                                                                                                                                                                                                                                                                                                                                                                                                                                                                                                                                                                                                                                                                                                                                                                                                                                                                                                                                                                                                                                                                                                                                                                                                                                                                                                                                                                                                                                                                                                                                                                                                                                                                                                                                                                                                                                                                                                 | 3.661114000  | -0.131208000 |              |              |   |              |              |             |   |              |              |              |   |              |              |              |   |              |              |              |   |              |              |              |   |              |             |             |   |              |              |              |   |              |             |              |   |              |             |              |   |              |             |              |   |              |             |              |   |              |             |              |   |              |              |              |   |              |              |              |   |              |              |              |   |              |              |              |   |              |              |              |   |             |              |             |   |              |              |              |   |              |             |              |   |              |             |             |   |             |              |             |   |             |              |             |   |             |             |             |   |             |              |             |   |             |              |             |   |             |             |             |   |             |             |             |   |             |             |             |   |             |             |             |   |             |             |             |   |              |             |              |   |              |             |              |   |             |             |              |   |             |             |             |   |              |             |              |   |              |              |             |   |              |             |             |   |              |              |             |
| H                                                                                                                                                            | -1.086041000                                                                                                                                                                                                                                                                                                                                                                                                                                                                                                                                                                                                                                                                                                                                                                                                                                                                                                                                                                                                                                                                                                                                                                                                                                                                                                                                                                                                                                                                                                                                                                                                                                                                                                                                                                                                                                                                                                                                                                                                                                                                                                                                                                                                                                                                                                                                                                                                                                                                                                                                                                                                                                                                                                                                                                                                                                                                                                                                                                                                                                                                                                                                                                                                                                                                                                                                                                                                                                 | 4.565616000  | -0.179244000 |              |              |   |              |              |             |   |              |              |              |   |              |              |              |   |              |              |              |   |              |              |              |   |              |             |             |   |              |              |              |   |              |             |              |   |              |             |              |   |              |             |              |   |              |             |              |   |              |             |              |   |              |              |              |   |              |              |              |   |              |              |              |   |              |              |              |   |              |              |              |   |             |              |             |   |              |              |              |   |              |             |              |   |              |             |             |   |             |              |             |   |             |              |             |   |             |             |             |   |             |              |             |   |             |              |             |   |             |             |             |   |             |             |             |   |             |             |             |   |             |             |             |   |             |             |             |   |              |             |              |   |              |             |              |   |             |             |              |   |             |             |             |   |              |             |              |   |              |              |             |   |              |             |             |   |              |              |             |
| C                                                                                                                                                            | 0.857381000                                                                                                                                                                                                                                                                                                                                                                                                                                                                                                                                                                                                                                                                                                                                                                                                                                                                                                                                                                                                                                                                                                                                                                                                                                                                                                                                                                                                                                                                                                                                                                                                                                                                                                                                                                                                                                                                                                                                                                                                                                                                                                                                                                                                                                                                                                                                                                                                                                                                                                                                                                                                                                                                                                                                                                                                                                                                                                                                                                                                                                                                                                                                                                                                                                                                                                                                                                                                                                  | 3.725071000  | -0.007586000 |              |              |   |              |              |             |   |              |              |              |   |              |              |              |   |              |              |              |   |              |              |              |   |              |             |             |   |              |              |              |   |              |             |              |   |              |             |              |   |              |             |              |   |              |             |              |   |              |             |              |   |              |              |              |   |              |              |              |   |              |              |              |   |              |              |              |   |              |              |              |   |             |              |             |   |              |              |              |   |              |             |              |   |              |             |             |   |             |              |             |   |             |              |             |   |             |             |             |   |             |              |             |   |             |              |             |   |             |             |             |   |             |             |             |   |             |             |             |   |             |             |             |   |             |             |             |   |              |             |              |   |              |             |              |   |             |             |              |   |             |             |             |   |              |             |              |   |              |              |             |   |              |             |             |   |              |              |             |
| H                                                                                                                                                            | 1.361013000                                                                                                                                                                                                                                                                                                                                                                                                                                                                                                                                                                                                                                                                                                                                                                                                                                                                                                                                                                                                                                                                                                                                                                                                                                                                                                                                                                                                                                                                                                                                                                                                                                                                                                                                                                                                                                                                                                                                                                                                                                                                                                                                                                                                                                                                                                                                                                                                                                                                                                                                                                                                                                                                                                                                                                                                                                                                                                                                                                                                                                                                                                                                                                                                                                                                                                                                                                                                                                  | 4.684379000  | 0.047904000  |              |              |   |              |              |             |   |              |              |              |   |              |              |              |   |              |              |              |   |              |              |              |   |              |             |             |   |              |              |              |   |              |             |              |   |              |             |              |   |              |             |              |   |              |             |              |   |              |             |              |   |              |              |              |   |              |              |              |   |              |              |              |   |              |              |              |   |              |              |              |   |             |              |             |   |              |              |              |   |              |             |              |   |              |             |             |   |             |              |             |   |             |              |             |   |             |             |             |   |             |              |             |   |             |              |             |   |             |             |             |   |             |             |             |   |             |             |             |   |             |             |             |   |             |             |             |   |              |             |              |   |              |             |              |   |             |             |              |   |             |             |             |   |              |             |              |   |              |              |             |   |              |             |             |   |              |              |             |
| H                                                                                                                                                            | -3.816867000                                                                                                                                                                                                                                                                                                                                                                                                                                                                                                                                                                                                                                                                                                                                                                                                                                                                                                                                                                                                                                                                                                                                                                                                                                                                                                                                                                                                                                                                                                                                                                                                                                                                                                                                                                                                                                                                                                                                                                                                                                                                                                                                                                                                                                                                                                                                                                                                                                                                                                                                                                                                                                                                                                                                                                                                                                                                                                                                                                                                                                                                                                                                                                                                                                                                                                                                                                                                                                 | 1.037232000  | -1.364923000 |              |              |   |              |              |             |   |              |              |              |   |              |              |              |   |              |              |              |   |              |              |              |   |              |             |             |   |              |              |              |   |              |             |              |   |              |             |              |   |              |             |              |   |              |             |              |   |              |             |              |   |              |              |              |   |              |              |              |   |              |              |              |   |              |              |              |   |              |              |              |   |             |              |             |   |              |              |              |   |              |             |              |   |              |             |             |   |             |              |             |   |             |              |             |   |             |             |             |   |             |              |             |   |             |              |             |   |             |             |             |   |             |             |             |   |             |             |             |   |             |             |             |   |             |             |             |   |              |             |              |   |              |             |              |   |             |             |              |   |             |             |             |   |              |             |              |   |              |              |             |   |              |             |             |   |              |              |             |
| O                                                                                                                                                            | -5.715244000                                                                                                                                                                                                                                                                                                                                                                                                                                                                                                                                                                                                                                                                                                                                                                                                                                                                                                                                                                                                                                                                                                                                                                                                                                                                                                                                                                                                                                                                                                                                                                                                                                                                                                                                                                                                                                                                                                                                                                                                                                                                                                                                                                                                                                                                                                                                                                                                                                                                                                                                                                                                                                                                                                                                                                                                                                                                                                                                                                                                                                                                                                                                                                                                                                                                                                                                                                                                                                 | -0.103882000 | 1.138411000  |              |              |   |              |              |             |   |              |              |              |   |              |              |              |   |              |              |              |   |              |              |              |   |              |             |             |   |              |              |              |   |              |             |              |   |              |             |              |   |              |             |              |   |              |             |              |   |              |             |              |   |              |              |              |   |              |              |              |   |              |              |              |   |              |              |              |   |              |              |              |   |             |              |             |   |              |              |              |   |              |             |              |   |              |             |             |   |             |              |             |   |             |              |             |   |             |             |             |   |             |              |             |   |             |              |             |   |             |             |             |   |             |             |             |   |             |             |             |   |             |             |             |   |             |             |             |   |              |             |              |   |              |             |              |   |             |             |              |   |             |             |             |   |              |             |              |   |              |              |             |   |              |             |             |   |              |              |             |
| H                                                                                                                                                            | -6.635750000                                                                                                                                                                                                                                                                                                                                                                                                                                                                                                                                                                                                                                                                                                                                                                                                                                                                                                                                                                                                                                                                                                                                                                                                                                                                                                                                                                                                                                                                                                                                                                                                                                                                                                                                                                                                                                                                                                                                                                                                                                                                                                                                                                                                                                                                                                                                                                                                                                                                                                                                                                                                                                                                                                                                                                                                                                                                                                                                                                                                                                                                                                                                                                                                                                                                                                                                                                                                                                 | 0.099052000  | 0.954433000  |              |              |   |              |              |             |   |              |              |              |   |              |              |              |   |              |              |              |   |              |              |              |   |              |             |             |   |              |              |              |   |              |             |              |   |              |             |              |   |              |             |              |   |              |             |              |   |              |             |              |   |              |              |              |   |              |              |              |   |              |              |              |   |              |              |              |   |              |              |              |   |             |              |             |   |              |              |              |   |              |             |              |   |              |             |             |   |             |              |             |   |             |              |             |   |             |             |             |   |             |              |             |   |             |              |             |   |             |             |             |   |             |             |             |   |             |             |             |   |             |             |             |   |             |             |             |   |              |             |              |   |              |             |              |   |             |             |              |   |             |             |             |   |              |             |              |   |              |              |             |   |              |             |             |   |              |              |             |
| H                                                                                                                                                            | -5.716081000                                                                                                                                                                                                                                                                                                                                                                                                                                                                                                                                                                                                                                                                                                                                                                                                                                                                                                                                                                                                                                                                                                                                                                                                                                                                                                                                                                                                                                                                                                                                                                                                                                                                                                                                                                                                                                                                                                                                                                                                                                                                                                                                                                                                                                                                                                                                                                                                                                                                                                                                                                                                                                                                                                                                                                                                                                                                                                                                                                                                                                                                                                                                                                                                                                                                                                                                                                                                                                 | -0.473389000 | 2.024809000  |              |              |   |              |              |             |   |              |              |              |   |              |              |              |   |              |              |              |   |              |              |              |   |              |             |             |   |              |              |              |   |              |             |              |   |              |             |              |   |              |             |              |   |              |             |              |   |              |             |              |   |              |              |              |   |              |              |              |   |              |              |              |   |              |              |              |   |              |              |              |   |             |              |             |   |              |              |              |   |              |             |              |   |              |             |             |   |             |              |             |   |             |              |             |   |             |             |             |   |             |              |             |   |             |              |             |   |             |             |             |   |             |             |             |   |             |             |             |   |             |             |             |   |             |             |             |   |              |             |              |   |              |             |              |   |             |             |              |   |             |             |             |   |              |             |              |   |              |              |             |   |              |             |             |   |              |              |             |
|  <p style="text-align: center;"><b>CorH<sup>+</sup>-W<sub>2</sub></b></p> | <table border="1"> <tbody> <tr><td>C</td><td>-1.905908000</td><td>-3.559702000</td><td>0.086835000</td></tr> <tr><td>C</td><td>-2.474823000</td><td>-2.259180000</td><td>0.112681000</td></tr> <tr><td>C</td><td>-1.615676000</td><td>-1.134873000</td><td>0.040702000</td></tr> <tr><td>C</td><td>-0.215698000</td><td>-1.316959000</td><td>-0.069605000</td></tr> <tr><td>C</td><td>0.325927000</td><td>-2.621711000</td><td>-0.093052000</td></tr> <tr><td>C</td><td>-0.555846000</td><td>-3.735191000</td><td>-0.015266000</td></tr> <tr><td>C</td><td>-2.157822000</td><td>0.170992000</td><td>0.045706000</td></tr> <tr><td>C</td><td>0.649031000</td><td>-0.192107000</td><td>-0.133067000</td></tr> <tr><td>C</td><td>0.097959000</td><td>1.120182000</td><td>-0.132019000</td></tr> <tr><td>C</td><td>-1.296860000</td><td>1.301121000</td><td>-0.028981000</td></tr> <tr><td>C</td><td>0.952031000</td><td>2.282309000</td><td>-0.219333000</td></tr> <tr><td>C</td><td>2.304546000</td><td>2.106908000</td><td>-0.305053000</td></tr> <tr><td>C</td><td>2.941267000</td><td>0.793559000</td><td>-0.289902000</td></tr> <tr><td>C</td><td>2.042142000</td><td>-0.384199000</td><td>-0.235889000</td></tr> <tr><td>C</td><td>2.562776000</td><td>-1.680843000</td><td>-0.279345000</td></tr> <tr><td>C</td><td>1.721559000</td><td>-2.772422000</td><td>-0.207889000</td></tr> </tbody> </table>                                                                                                                                                                                                                                                                                                                                                                                                                                                                                                                                                                                                                                                                                                                                                                                                                                                                                                                                                                                                                                                                                                                                                                                                                                                                                                                                                                                                                                                                                                                                                                                                                                                                                                                                                                                                                                                                                                                                                                                                                                    | C            | -1.905908000 | -3.559702000 | 0.086835000  | C | -2.474823000 | -2.259180000 | 0.112681000 | C | -1.615676000 | -1.134873000 | 0.040702000  | C | -0.215698000 | -1.316959000 | -0.069605000 | C | 0.325927000  | -2.621711000 | -0.093052000 | C | -0.555846000 | -3.735191000 | -0.015266000 | C | -2.157822000 | 0.170992000 | 0.045706000 | C | 0.649031000  | -0.192107000 | -0.133067000 | C | 0.097959000  | 1.120182000 | -0.132019000 | C | -1.296860000 | 1.301121000 | -0.028981000 | C | 0.952031000  | 2.282309000 | -0.219333000 | C | 2.304546000  | 2.106908000 | -0.305053000 | C | 2.941267000  | 0.793559000 | -0.289902000 | C | 2.042142000  | -0.384199000 | -0.235889000 | C | 2.562776000  | -1.680843000 | -0.279345000 | C | 1.721559000  | -2.772422000 | -0.207889000 |   |              |              |              |   |              |              |              |   |             |              |             |   |              |              |              |   |              |             |              |   |              |             |             |   |             |              |             |   |             |              |             |   |             |             |             |   |             |              |             |   |             |              |             |   |             |             |             |   |             |             |             |   |             |             |             |   |             |             |             |   |             |             |             |   |              |             |              |   |              |             |              |   |             |             |              |   |             |             |             |   |              |             |              |   |              |              |             |   |              |             |             |   |              |              |             |
| C                                                                                                                                                            | -1.905908000                                                                                                                                                                                                                                                                                                                                                                                                                                                                                                                                                                                                                                                                                                                                                                                                                                                                                                                                                                                                                                                                                                                                                                                                                                                                                                                                                                                                                                                                                                                                                                                                                                                                                                                                                                                                                                                                                                                                                                                                                                                                                                                                                                                                                                                                                                                                                                                                                                                                                                                                                                                                                                                                                                                                                                                                                                                                                                                                                                                                                                                                                                                                                                                                                                                                                                                                                                                                                                 | -3.559702000 | 0.086835000  |              |              |   |              |              |             |   |              |              |              |   |              |              |              |   |              |              |              |   |              |              |              |   |              |             |             |   |              |              |              |   |              |             |              |   |              |             |              |   |              |             |              |   |              |             |              |   |              |             |              |   |              |              |              |   |              |              |              |   |              |              |              |   |              |              |              |   |              |              |              |   |             |              |             |   |              |              |              |   |              |             |              |   |              |             |             |   |             |              |             |   |             |              |             |   |             |             |             |   |             |              |             |   |             |              |             |   |             |             |             |   |             |             |             |   |             |             |             |   |             |             |             |   |             |             |             |   |              |             |              |   |              |             |              |   |             |             |              |   |             |             |             |   |              |             |              |   |              |              |             |   |              |             |             |   |              |              |             |
| C                                                                                                                                                            | -2.474823000                                                                                                                                                                                                                                                                                                                                                                                                                                                                                                                                                                                                                                                                                                                                                                                                                                                                                                                                                                                                                                                                                                                                                                                                                                                                                                                                                                                                                                                                                                                                                                                                                                                                                                                                                                                                                                                                                                                                                                                                                                                                                                                                                                                                                                                                                                                                                                                                                                                                                                                                                                                                                                                                                                                                                                                                                                                                                                                                                                                                                                                                                                                                                                                                                                                                                                                                                                                                                                 | -2.259180000 | 0.112681000  |              |              |   |              |              |             |   |              |              |              |   |              |              |              |   |              |              |              |   |              |              |              |   |              |             |             |   |              |              |              |   |              |             |              |   |              |             |              |   |              |             |              |   |              |             |              |   |              |             |              |   |              |              |              |   |              |              |              |   |              |              |              |   |              |              |              |   |              |              |              |   |             |              |             |   |              |              |              |   |              |             |              |   |              |             |             |   |             |              |             |   |             |              |             |   |             |             |             |   |             |              |             |   |             |              |             |   |             |             |             |   |             |             |             |   |             |             |             |   |             |             |             |   |             |             |             |   |              |             |              |   |              |             |              |   |             |             |              |   |             |             |             |   |              |             |              |   |              |              |             |   |              |             |             |   |              |              |             |
| C                                                                                                                                                            | -1.615676000                                                                                                                                                                                                                                                                                                                                                                                                                                                                                                                                                                                                                                                                                                                                                                                                                                                                                                                                                                                                                                                                                                                                                                                                                                                                                                                                                                                                                                                                                                                                                                                                                                                                                                                                                                                                                                                                                                                                                                                                                                                                                                                                                                                                                                                                                                                                                                                                                                                                                                                                                                                                                                                                                                                                                                                                                                                                                                                                                                                                                                                                                                                                                                                                                                                                                                                                                                                                                                 | -1.134873000 | 0.040702000  |              |              |   |              |              |             |   |              |              |              |   |              |              |              |   |              |              |              |   |              |              |              |   |              |             |             |   |              |              |              |   |              |             |              |   |              |             |              |   |              |             |              |   |              |             |              |   |              |             |              |   |              |              |              |   |              |              |              |   |              |              |              |   |              |              |              |   |              |              |              |   |             |              |             |   |              |              |              |   |              |             |              |   |              |             |             |   |             |              |             |   |             |              |             |   |             |             |             |   |             |              |             |   |             |              |             |   |             |             |             |   |             |             |             |   |             |             |             |   |             |             |             |   |             |             |             |   |              |             |              |   |              |             |              |   |             |             |              |   |             |             |             |   |              |             |              |   |              |              |             |   |              |             |             |   |              |              |             |
| C                                                                                                                                                            | -0.215698000                                                                                                                                                                                                                                                                                                                                                                                                                                                                                                                                                                                                                                                                                                                                                                                                                                                                                                                                                                                                                                                                                                                                                                                                                                                                                                                                                                                                                                                                                                                                                                                                                                                                                                                                                                                                                                                                                                                                                                                                                                                                                                                                                                                                                                                                                                                                                                                                                                                                                                                                                                                                                                                                                                                                                                                                                                                                                                                                                                                                                                                                                                                                                                                                                                                                                                                                                                                                                                 | -1.316959000 | -0.069605000 |              |              |   |              |              |             |   |              |              |              |   |              |              |              |   |              |              |              |   |              |              |              |   |              |             |             |   |              |              |              |   |              |             |              |   |              |             |              |   |              |             |              |   |              |             |              |   |              |             |              |   |              |              |              |   |              |              |              |   |              |              |              |   |              |              |              |   |              |              |              |   |             |              |             |   |              |              |              |   |              |             |              |   |              |             |             |   |             |              |             |   |             |              |             |   |             |             |             |   |             |              |             |   |             |              |             |   |             |             |             |   |             |             |             |   |             |             |             |   |             |             |             |   |             |             |             |   |              |             |              |   |              |             |              |   |             |             |              |   |             |             |             |   |              |             |              |   |              |              |             |   |              |             |             |   |              |              |             |
| C                                                                                                                                                            | 0.325927000                                                                                                                                                                                                                                                                                                                                                                                                                                                                                                                                                                                                                                                                                                                                                                                                                                                                                                                                                                                                                                                                                                                                                                                                                                                                                                                                                                                                                                                                                                                                                                                                                                                                                                                                                                                                                                                                                                                                                                                                                                                                                                                                                                                                                                                                                                                                                                                                                                                                                                                                                                                                                                                                                                                                                                                                                                                                                                                                                                                                                                                                                                                                                                                                                                                                                                                                                                                                                                  | -2.621711000 | -0.093052000 |              |              |   |              |              |             |   |              |              |              |   |              |              |              |   |              |              |              |   |              |              |              |   |              |             |             |   |              |              |              |   |              |             |              |   |              |             |              |   |              |             |              |   |              |             |              |   |              |             |              |   |              |              |              |   |              |              |              |   |              |              |              |   |              |              |              |   |              |              |              |   |             |              |             |   |              |              |              |   |              |             |              |   |              |             |             |   |             |              |             |   |             |              |             |   |             |             |             |   |             |              |             |   |             |              |             |   |             |             |             |   |             |             |             |   |             |             |             |   |             |             |             |   |             |             |             |   |              |             |              |   |              |             |              |   |             |             |              |   |             |             |             |   |              |             |              |   |              |              |             |   |              |             |             |   |              |              |             |
| C                                                                                                                                                            | -0.555846000                                                                                                                                                                                                                                                                                                                                                                                                                                                                                                                                                                                                                                                                                                                                                                                                                                                                                                                                                                                                                                                                                                                                                                                                                                                                                                                                                                                                                                                                                                                                                                                                                                                                                                                                                                                                                                                                                                                                                                                                                                                                                                                                                                                                                                                                                                                                                                                                                                                                                                                                                                                                                                                                                                                                                                                                                                                                                                                                                                                                                                                                                                                                                                                                                                                                                                                                                                                                                                 | -3.735191000 | -0.015266000 |              |              |   |              |              |             |   |              |              |              |   |              |              |              |   |              |              |              |   |              |              |              |   |              |             |             |   |              |              |              |   |              |             |              |   |              |             |              |   |              |             |              |   |              |             |              |   |              |             |              |   |              |              |              |   |              |              |              |   |              |              |              |   |              |              |              |   |              |              |              |   |             |              |             |   |              |              |              |   |              |             |              |   |              |             |             |   |             |              |             |   |             |              |             |   |             |             |             |   |             |              |             |   |             |              |             |   |             |             |             |   |             |             |             |   |             |             |             |   |             |             |             |   |             |             |             |   |              |             |              |   |              |             |              |   |             |             |              |   |             |             |             |   |              |             |              |   |              |              |             |   |              |             |             |   |              |              |             |
| C                                                                                                                                                            | -2.157822000                                                                                                                                                                                                                                                                                                                                                                                                                                                                                                                                                                                                                                                                                                                                                                                                                                                                                                                                                                                                                                                                                                                                                                                                                                                                                                                                                                                                                                                                                                                                                                                                                                                                                                                                                                                                                                                                                                                                                                                                                                                                                                                                                                                                                                                                                                                                                                                                                                                                                                                                                                                                                                                                                                                                                                                                                                                                                                                                                                                                                                                                                                                                                                                                                                                                                                                                                                                                                                 | 0.170992000  | 0.045706000  |              |              |   |              |              |             |   |              |              |              |   |              |              |              |   |              |              |              |   |              |              |              |   |              |             |             |   |              |              |              |   |              |             |              |   |              |             |              |   |              |             |              |   |              |             |              |   |              |             |              |   |              |              |              |   |              |              |              |   |              |              |              |   |              |              |              |   |              |              |              |   |             |              |             |   |              |              |              |   |              |             |              |   |              |             |             |   |             |              |             |   |             |              |             |   |             |             |             |   |             |              |             |   |             |              |             |   |             |             |             |   |             |             |             |   |             |             |             |   |             |             |             |   |             |             |             |   |              |             |              |   |              |             |              |   |             |             |              |   |             |             |             |   |              |             |              |   |              |              |             |   |              |             |             |   |              |              |             |
| C                                                                                                                                                            | 0.649031000                                                                                                                                                                                                                                                                                                                                                                                                                                                                                                                                                                                                                                                                                                                                                                                                                                                                                                                                                                                                                                                                                                                                                                                                                                                                                                                                                                                                                                                                                                                                                                                                                                                                                                                                                                                                                                                                                                                                                                                                                                                                                                                                                                                                                                                                                                                                                                                                                                                                                                                                                                                                                                                                                                                                                                                                                                                                                                                                                                                                                                                                                                                                                                                                                                                                                                                                                                                                                                  | -0.192107000 | -0.133067000 |              |              |   |              |              |             |   |              |              |              |   |              |              |              |   |              |              |              |   |              |              |              |   |              |             |             |   |              |              |              |   |              |             |              |   |              |             |              |   |              |             |              |   |              |             |              |   |              |             |              |   |              |              |              |   |              |              |              |   |              |              |              |   |              |              |              |   |              |              |              |   |             |              |             |   |              |              |              |   |              |             |              |   |              |             |             |   |             |              |             |   |             |              |             |   |             |             |             |   |             |              |             |   |             |              |             |   |             |             |             |   |             |             |             |   |             |             |             |   |             |             |             |   |             |             |             |   |              |             |              |   |              |             |              |   |             |             |              |   |             |             |             |   |              |             |              |   |              |              |             |   |              |             |             |   |              |              |             |
| C                                                                                                                                                            | 0.097959000                                                                                                                                                                                                                                                                                                                                                                                                                                                                                                                                                                                                                                                                                                                                                                                                                                                                                                                                                                                                                                                                                                                                                                                                                                                                                                                                                                                                                                                                                                                                                                                                                                                                                                                                                                                                                                                                                                                                                                                                                                                                                                                                                                                                                                                                                                                                                                                                                                                                                                                                                                                                                                                                                                                                                                                                                                                                                                                                                                                                                                                                                                                                                                                                                                                                                                                                                                                                                                  | 1.120182000  | -0.132019000 |              |              |   |              |              |             |   |              |              |              |   |              |              |              |   |              |              |              |   |              |              |              |   |              |             |             |   |              |              |              |   |              |             |              |   |              |             |              |   |              |             |              |   |              |             |              |   |              |             |              |   |              |              |              |   |              |              |              |   |              |              |              |   |              |              |              |   |              |              |              |   |             |              |             |   |              |              |              |   |              |             |              |   |              |             |             |   |             |              |             |   |             |              |             |   |             |             |             |   |             |              |             |   |             |              |             |   |             |             |             |   |             |             |             |   |             |             |             |   |             |             |             |   |             |             |             |   |              |             |              |   |              |             |              |   |             |             |              |   |             |             |             |   |              |             |              |   |              |              |             |   |              |             |             |   |              |              |             |
| C                                                                                                                                                            | -1.296860000                                                                                                                                                                                                                                                                                                                                                                                                                                                                                                                                                                                                                                                                                                                                                                                                                                                                                                                                                                                                                                                                                                                                                                                                                                                                                                                                                                                                                                                                                                                                                                                                                                                                                                                                                                                                                                                                                                                                                                                                                                                                                                                                                                                                                                                                                                                                                                                                                                                                                                                                                                                                                                                                                                                                                                                                                                                                                                                                                                                                                                                                                                                                                                                                                                                                                                                                                                                                                                 | 1.301121000  | -0.028981000 |              |              |   |              |              |             |   |              |              |              |   |              |              |              |   |              |              |              |   |              |              |              |   |              |             |             |   |              |              |              |   |              |             |              |   |              |             |              |   |              |             |              |   |              |             |              |   |              |             |              |   |              |              |              |   |              |              |              |   |              |              |              |   |              |              |              |   |              |              |              |   |             |              |             |   |              |              |              |   |              |             |              |   |              |             |             |   |             |              |             |   |             |              |             |   |             |             |             |   |             |              |             |   |             |              |             |   |             |             |             |   |             |             |             |   |             |             |             |   |             |             |             |   |             |             |             |   |              |             |              |   |              |             |              |   |             |             |              |   |             |             |             |   |              |             |              |   |              |              |             |   |              |             |             |   |              |              |             |
| C                                                                                                                                                            | 0.952031000                                                                                                                                                                                                                                                                                                                                                                                                                                                                                                                                                                                                                                                                                                                                                                                                                                                                                                                                                                                                                                                                                                                                                                                                                                                                                                                                                                                                                                                                                                                                                                                                                                                                                                                                                                                                                                                                                                                                                                                                                                                                                                                                                                                                                                                                                                                                                                                                                                                                                                                                                                                                                                                                                                                                                                                                                                                                                                                                                                                                                                                                                                                                                                                                                                                                                                                                                                                                                                  | 2.282309000  | -0.219333000 |              |              |   |              |              |             |   |              |              |              |   |              |              |              |   |              |              |              |   |              |              |              |   |              |             |             |   |              |              |              |   |              |             |              |   |              |             |              |   |              |             |              |   |              |             |              |   |              |             |              |   |              |              |              |   |              |              |              |   |              |              |              |   |              |              |              |   |              |              |              |   |             |              |             |   |              |              |              |   |              |             |              |   |              |             |             |   |             |              |             |   |             |              |             |   |             |             |             |   |             |              |             |   |             |              |             |   |             |             |             |   |             |             |             |   |             |             |             |   |             |             |             |   |             |             |             |   |              |             |              |   |              |             |              |   |             |             |              |   |             |             |             |   |              |             |              |   |              |              |             |   |              |             |             |   |              |              |             |
| C                                                                                                                                                            | 2.304546000                                                                                                                                                                                                                                                                                                                                                                                                                                                                                                                                                                                                                                                                                                                                                                                                                                                                                                                                                                                                                                                                                                                                                                                                                                                                                                                                                                                                                                                                                                                                                                                                                                                                                                                                                                                                                                                                                                                                                                                                                                                                                                                                                                                                                                                                                                                                                                                                                                                                                                                                                                                                                                                                                                                                                                                                                                                                                                                                                                                                                                                                                                                                                                                                                                                                                                                                                                                                                                  | 2.106908000  | -0.305053000 |              |              |   |              |              |             |   |              |              |              |   |              |              |              |   |              |              |              |   |              |              |              |   |              |             |             |   |              |              |              |   |              |             |              |   |              |             |              |   |              |             |              |   |              |             |              |   |              |             |              |   |              |              |              |   |              |              |              |   |              |              |              |   |              |              |              |   |              |              |              |   |             |              |             |   |              |              |              |   |              |             |              |   |              |             |             |   |             |              |             |   |             |              |             |   |             |             |             |   |             |              |             |   |             |              |             |   |             |             |             |   |             |             |             |   |             |             |             |   |             |             |             |   |             |             |             |   |              |             |              |   |              |             |              |   |             |             |              |   |             |             |             |   |              |             |              |   |              |              |             |   |              |             |             |   |              |              |             |
| C                                                                                                                                                            | 2.941267000                                                                                                                                                                                                                                                                                                                                                                                                                                                                                                                                                                                                                                                                                                                                                                                                                                                                                                                                                                                                                                                                                                                                                                                                                                                                                                                                                                                                                                                                                                                                                                                                                                                                                                                                                                                                                                                                                                                                                                                                                                                                                                                                                                                                                                                                                                                                                                                                                                                                                                                                                                                                                                                                                                                                                                                                                                                                                                                                                                                                                                                                                                                                                                                                                                                                                                                                                                                                                                  | 0.793559000  | -0.289902000 |              |              |   |              |              |             |   |              |              |              |   |              |              |              |   |              |              |              |   |              |              |              |   |              |             |             |   |              |              |              |   |              |             |              |   |              |             |              |   |              |             |              |   |              |             |              |   |              |             |              |   |              |              |              |   |              |              |              |   |              |              |              |   |              |              |              |   |              |              |              |   |             |              |             |   |              |              |              |   |              |             |              |   |              |             |             |   |             |              |             |   |             |              |             |   |             |             |             |   |             |              |             |   |             |              |             |   |             |             |             |   |             |             |             |   |             |             |             |   |             |             |             |   |             |             |             |   |              |             |              |   |              |             |              |   |             |             |              |   |             |             |             |   |              |             |              |   |              |              |             |   |              |             |             |   |              |              |             |
| C                                                                                                                                                            | 2.042142000                                                                                                                                                                                                                                                                                                                                                                                                                                                                                                                                                                                                                                                                                                                                                                                                                                                                                                                                                                                                                                                                                                                                                                                                                                                                                                                                                                                                                                                                                                                                                                                                                                                                                                                                                                                                                                                                                                                                                                                                                                                                                                                                                                                                                                                                                                                                                                                                                                                                                                                                                                                                                                                                                                                                                                                                                                                                                                                                                                                                                                                                                                                                                                                                                                                                                                                                                                                                                                  | -0.384199000 | -0.235889000 |              |              |   |              |              |             |   |              |              |              |   |              |              |              |   |              |              |              |   |              |              |              |   |              |             |             |   |              |              |              |   |              |             |              |   |              |             |              |   |              |             |              |   |              |             |              |   |              |             |              |   |              |              |              |   |              |              |              |   |              |              |              |   |              |              |              |   |              |              |              |   |             |              |             |   |              |              |              |   |              |             |              |   |              |             |             |   |             |              |             |   |             |              |             |   |             |             |             |   |             |              |             |   |             |              |             |   |             |             |             |   |             |             |             |   |             |             |             |   |             |             |             |   |             |             |             |   |              |             |              |   |              |             |              |   |             |             |              |   |             |             |             |   |              |             |              |   |              |              |             |   |              |             |             |   |              |              |             |
| C                                                                                                                                                            | 2.562776000                                                                                                                                                                                                                                                                                                                                                                                                                                                                                                                                                                                                                                                                                                                                                                                                                                                                                                                                                                                                                                                                                                                                                                                                                                                                                                                                                                                                                                                                                                                                                                                                                                                                                                                                                                                                                                                                                                                                                                                                                                                                                                                                                                                                                                                                                                                                                                                                                                                                                                                                                                                                                                                                                                                                                                                                                                                                                                                                                                                                                                                                                                                                                                                                                                                                                                                                                                                                                                  | -1.680843000 | -0.279345000 |              |              |   |              |              |             |   |              |              |              |   |              |              |              |   |              |              |              |   |              |              |              |   |              |             |             |   |              |              |              |   |              |             |              |   |              |             |              |   |              |             |              |   |              |             |              |   |              |             |              |   |              |              |              |   |              |              |              |   |              |              |              |   |              |              |              |   |              |              |              |   |             |              |             |   |              |              |              |   |              |             |              |   |              |             |             |   |             |              |             |   |             |              |             |   |             |             |             |   |             |              |             |   |             |              |             |   |             |             |             |   |             |             |             |   |             |             |             |   |             |             |             |   |             |             |             |   |              |             |              |   |              |             |              |   |             |             |              |   |             |             |             |   |              |             |              |   |              |              |             |   |              |             |             |   |              |              |             |
| C                                                                                                                                                            | 1.721559000                                                                                                                                                                                                                                                                                                                                                                                                                                                                                                                                                                                                                                                                                                                                                                                                                                                                                                                                                                                                                                                                                                                                                                                                                                                                                                                                                                                                                                                                                                                                                                                                                                                                                                                                                                                                                                                                                                                                                                                                                                                                                                                                                                                                                                                                                                                                                                                                                                                                                                                                                                                                                                                                                                                                                                                                                                                                                                                                                                                                                                                                                                                                                                                                                                                                                                                                                                                                                                  | -2.772422000 | -0.207889000 |              |              |   |              |              |             |   |              |              |              |   |              |              |              |   |              |              |              |   |              |              |              |   |              |             |             |   |              |              |              |   |              |             |              |   |              |             |              |   |              |             |              |   |              |             |              |   |              |             |              |   |              |              |              |   |              |              |              |   |              |              |              |   |              |              |              |   |              |              |              |   |             |              |             |   |              |              |              |   |              |             |              |   |              |             |             |   |             |              |             |   |             |              |             |   |             |             |             |   |             |              |             |   |             |              |             |   |             |             |             |   |             |             |             |   |             |             |             |   |             |             |             |   |             |             |             |   |              |             |              |   |              |             |              |   |             |             |              |   |             |             |             |   |              |             |              |   |              |              |             |   |              |             |             |   |              |              |             |



|  |   |              |              |              |
|--|---|--------------|--------------|--------------|
|  | H | 2.138284000  | -3.774571000 | -0.244505000 |
|  | H | 3.635421000  | -1.807032000 | -0.390566000 |
|  | H | -2.565572000 | -4.419323000 | 0.145085000  |
|  | H | -0.135525000 | -4.735650000 | -0.037971000 |
|  | H | 2.950858000  | 2.978852000  | -0.368774000 |
|  | H | 3.658601000  | 0.694852000  | -1.122367000 |
|  | C | -3.873950000 | -2.049713000 | 0.212340000  |
|  | C | -4.397407000 | -0.787488000 | 0.228444000  |
|  | C | -3.555779000 | 0.352830000  | 0.146972000  |
|  | H | -4.528588000 | -2.912988000 | 0.272570000  |
|  | H | -5.470213000 | -0.641448000 | 0.303494000  |
|  | C | -4.068202000 | 1.668278000  | 0.152554000  |
|  | C | -3.242211000 | 2.765470000  | 0.065617000  |
|  | C | -1.848075000 | 2.613494000  | -0.031104000 |
|  | H | -5.142393000 | 1.809251000  | 0.226699000  |
|  | H | -3.664641000 | 3.764669000  | 0.068405000  |
|  | C | 0.361093000  | 3.591743000  | -0.217976000 |
|  | H | 1.016557000  | 4.453423000  | -0.290490000 |
|  | C | -0.980150000 | 3.747014000  | -0.125720000 |
|  | H | -1.421881000 | 4.737938000  | -0.124298000 |
|  | H | 3.641192000  | 0.770050000  | 0.568181000  |
|  | O | 5.579969000  | -0.631725000 | -0.920013000 |
|  | H | 5.911298000  | -0.281332000 | -0.080661000 |
|  | H | 6.347295000  | -0.924589000 | -1.414614000 |
|  | O | 5.776521000  | 0.508255000  | 1.661640000  |
|  | H | 6.339028000  | 1.250110000  | 1.899498000  |
|  | H | 5.818817000  | -0.091517000 | 2.411401000  |
|  | H | -3.226592000 | -0.762198000 | 0.511557000  |
|  | H | -3.345274000 | -0.620657000 | -1.164388000 |
|  | O | -4.671732000 | -0.935385000 | 1.808816000  |
|  | H | -5.528146000 | -0.556742000 | 1.564836000  |
|  | H | -4.630566000 | -0.915997000 | 2.766615000  |
|  | H | -5.583773000 | 1.013075000  | -2.210460000 |
|  | H | -5.913825000 | 0.529478000  | -0.790891000 |
|  | O | -5.180162000 | 0.712772000  | -1.393851000 |
|  | H | -7.783906000 | -0.565111000 | 0.540849000  |
|  | H | -7.578114000 | 0.859741000  | 1.067528000  |
|  | O | -7.113224000 | 0.108475000  | 0.687736000  |
|  | C | 2.293304000  | 3.557357000  | 0.147435000  |
|  | C | 2.852576000  | 2.252683000  | 0.168473000  |
|  | C | 1.987978000  | 1.136635000  | 0.058040000  |
|  | C | 0.592267000  | 1.331211000  | -0.084756000 |
|  | C | 0.060050000  | 2.639666000  | -0.102632000 |
|  | C | 0.947261000  | 3.744565000  | 0.013997000  |
|  | C | 2.520327000  | -0.174249000 | 0.058467000  |
|  | C | -0.278466000 | 0.213901000  | -0.186188000 |
|  | C | 0.261647000  | -1.103354000 | -0.190666000 |
|  | C | 1.653561000  | -1.296543000 | -0.055238000 |
|  | C | -0.596851000 | -2.254247000 | -0.318350000 |
|  | C | -1.948654000 | -2.062304000 | -0.442179000 |
|  | C | -2.567075000 | -0.750887000 | -0.394966000 |
|  | C | -1.666980000 | 0.415959000  | -0.319902000 |
|  | C | -2.178426000 | 1.718841000  | -0.354210000 |
|  | C | -1.333164000 | 2.802013000  | -0.247589000 |
|  | H | -1.740933000 | 3.808115000  | -0.277327000 |
|  | H | -3.247709000 | 1.852741000  | -0.483402000 |

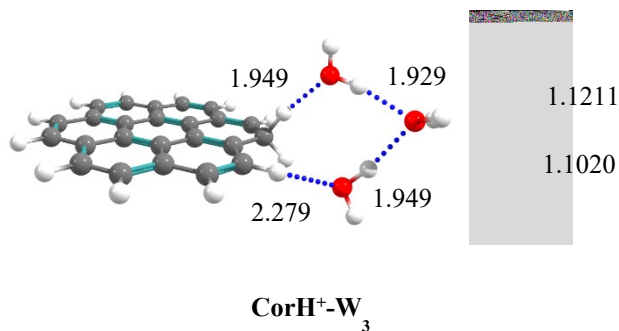

|                                                                                                                                               |              |              |              |              |
|-----------------------------------------------------------------------------------------------------------------------------------------------|--------------|--------------|--------------|--------------|
|                                                                                                                                               | H            | 2.957294000  | 4.411194000  | 0.235368000  |
|                                                                                                                                               | H            | 0.535106000  | 4.748572000  | -0.003844000 |
|                                                                                                                                               | H            | -2.603160000 | -2.925358000 | -0.534994000 |
|                                                                                                                                               | C            | 4.247232000  | 2.030624000  | 0.300615000  |
|                                                                                                                                               | C            | 4.760787000  | 0.764323000  | 0.311771000  |
|                                                                                                                                               | C            | 3.913666000  | -0.368355000 | 0.192483000  |
|                                                                                                                                               | H            | 4.906563000  | 2.887850000  | 0.390162000  |
|                                                                                                                                               | H            | 5.830266000  | 0.609045000  | 0.412044000  |
|                                                                                                                                               | C            | 4.416571000  | -1.688597000 | 0.192238000  |
|                                                                                                                                               | C            | 3.585668000  | -2.776543000 | 0.068131000  |
|                                                                                                                                               | C            | 2.193792000  | -2.612191000 | -0.062429000 |
|                                                                                                                                               | H            | 5.487484000  | -1.838364000 | 0.291972000  |
|                                                                                                                                               | H            | 3.999639000  | -3.779347000 | 0.067182000  |
|                                                                                                                                               | C            | -0.018357000 | -3.566825000 | -0.320855000 |
|                                                                                                                                               | H            | -0.678878000 | -4.421814000 | -0.421732000 |
|                                                                                                                                               | C            | 1.320056000  | -3.735471000 | -0.195958000 |
|                                                                                                                                               | H            | 1.752834000  | -4.730386000 | -0.197076000 |
| 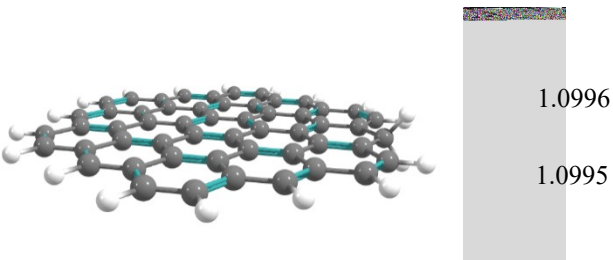 <p style="text-align: center;"><b>DbcH<sup>+</sup></b></p> | C            | -3.478667000 | -1.405165000 | -0.003511000 |
|                                                                                                                                               | C            | 0.759394000  | -1.193621000 | -0.002984000 |
|                                                                                                                                               | C            | 4.993162000  | -1.014713000 | -0.000927000 |
|                                                                                                                                               | C            | -4.898348000 | -1.473798000 | 0.000665000  |
|                                                                                                                                               | C            | -0.648727000 | -1.263092000 | 0.006464000  |
|                                                                                                                                               | C            | 3.591625000  | -1.063242000 | 0.004155000  |
|                                                                                                                                               | C            | -5.523667000 | -2.759292000 | -0.000772000 |
|                                                                                                                                               | C            | -1.300010000 | -2.526394000 | -0.005471000 |
|                                                                                                                                               | C            | 2.933903000  | -2.320893000 | -0.003503000 |
|                                                                                                                                               | C            | -2.711134000 | -2.595509000 | 0.004592000  |
|                                                                                                                                               | C            | 1.522946000  | -2.388654000 | 0.007828000  |
|                                                                                                                                               | C            | 5.729655000  | -2.205875000 | -0.002238000 |
|                                                                                                                                               | C            | -3.358992000 | -3.861962000 | -0.001390000 |
|                                                                                                                                               | C            | 0.874321000  | -3.645937000 | -0.003460000 |
|                                                                                                                                               | C            | 5.099961000  | -3.429595000 | -0.001743000 |
|                                                                                                                                               | C            | -4.787421000 | -3.901397000 | -0.001439000 |
|                                                                                                                                               | C            | -0.537183000 | -3.714706000 | 0.004747000  |
|                                                                                                                                               | C            | 3.693015000  | -3.520961000 | 0.000070000  |
|                                                                                                                                               | C            | -1.194679000 | -4.981378000 | -0.001290000 |
|                                                                                                                                               | C            | 3.027786000  | -4.763849000 | 0.000202000  |
|                                                                                                                                               | C            | -2.584109000 | -5.027768000 | -0.001981000 |
|                                                                                                                                               | C            | 1.646921000  | -4.849294000 | 0.000876000  |
|                                                                                                                                               | C            | 0.959434000  | -6.109573000 | -0.000410000 |
|                                                                                                                                               | C            | -0.393005000 | -6.171237000 | -0.001024000 |
|                                                                                                                                               | C            | 0.329658000  | 6.175649000  | -0.000421000 |
|                                                                                                                                               | C            | -1.021998000 | 6.098707000  | -0.001019000 |
|                                                                                                                                               | C            | -1.697802000 | 4.833107000  | -0.001268000 |
|                                                                                                                                               | C            | 2.524771000  | 5.048469000  | 0.000178000  |
|                                                                                                                                               | C            | -3.084691000 | 4.737191000  | -0.001949000 |
|                                                                                                                                               | C            | 1.142406000  | 4.992275000  | 0.000868000  |
|                                                                                                                                               | C            | -3.736300000 | 3.498260000  | -0.001356000 |
|                                                                                                                                               | C            | 0.496909000  | 3.716220000  | -0.003453000 |
|                                                                                                                                               | C            | 4.722528000  | 3.933089000  | -0.001782000 |
|                                                                                                                                               | C            | -5.161267000 | 3.391442000  | -0.001401000 |
|                                                                                                                                               | C            | -0.914229000 | 3.640310000  | 0.004766000  |
|                                                                                                                                               | C            | 3.313608000  | 3.880122000  | 0.000046000  |
| C                                                                                                                                             | -5.776868000 | 2.180039000  | -0.000744000 |              |
| C                                                                                                                                             | -1.551541000 | 2.380218000  | -0.005450000 |              |
| C                                                                                                                                             | 2.681192000  | 2.608716000  | -0.003512000 |              |

|                                                                                                                                  |   |              |              |              |
|----------------------------------------------------------------------------------------------------------------------------------|---|--------------|--------------|--------------|
|                                                                                                                                  | C | -2.962337000 | 2.304692000  | 0.004617000  |
|                                                                                                                                  | C | 1.270702000  | 2.531858000  | 0.007830000  |
|                                                                                                                                  | C | 5.474056000  | 2.780173000  | -0.002270000 |
|                                                                                                                                  | C | -3.604123000 | 1.042098000  | -0.003495000 |
|                                                                                                                                  | C | 0.633355000  | 1.265005000  | -0.002979000 |
|                                                                                                                                  | C | 4.863227000  | 1.519942000  | -0.000939000 |
|                                                                                                                                  | C | -5.023379000 | 0.965221000  | 0.000679000  |
|                                                                                                                                  | C | -0.774488000 | 1.190139000  | 0.006472000  |
|                                                                                                                                  | C | 3.464073000  | 1.424921000  | 0.004147000  |
|                                                                                                                                  | C | -5.637180000 | -0.288959000 | 0.000601000  |
|                                                                                                                                  | C | -1.418342000 | -0.072708000 | -0.003149000 |
|                                                                                                                                  | C | 2.818376000  | 0.144467000  | -0.004053000 |
|                                                                                                                                  | C | -2.834705000 | -0.145305000 | 0.007854000  |
|                                                                                                                                  | C | 1.413472000  | 0.072454000  | 0.007029000  |
|                                                                                                                                  | C | 5.709190000  | 0.292648000  | 0.000546000  |
|                                                                                                                                  | H | -6.860514000 | 2.117450000  | -0.000655000 |
|                                                                                                                                  | H | -6.722356000 | -0.344586000 | 0.002425000  |
|                                                                                                                                  | H | -6.608033000 | -2.807833000 | -0.000682000 |
|                                                                                                                                  | H | 6.814292000  | -2.157632000 | -0.004093000 |
|                                                                                                                                  | H | 6.385119000  | 0.327285000  | -0.865768000 |
|                                                                                                                                  | H | 6.557941000  | 2.843084000  | -0.004133000 |
|                                                                                                                                  | H | 5.687669000  | -4.342366000 | -0.002168000 |
|                                                                                                                                  | H | 3.619302000  | -5.675017000 | 0.001912000  |
|                                                                                                                                  | H | 1.551115000  | -7.019411000 | -0.000184000 |
|                                                                                                                                  | H | -0.897661000 | -7.132092000 | -0.002296000 |
|                                                                                                                                  | H | -3.082700000 | -5.992608000 | -0.005196000 |
|                                                                                                                                  | H | -5.278783000 | -4.869042000 | -0.002878000 |
|                                                                                                                                  | H | -5.748995000 | 4.303776000  | -0.002834000 |
|                                                                                                                                  | H | -3.679325000 | 5.645994000  | -0.005163000 |
|                                                                                                                                  | H | -1.622254000 | 7.002925000  | -0.002294000 |
|                                                                                                                                  | H | 0.825212000  | 7.141217000  | -0.000212000 |
|                                                                                                                                  | H | 3.020014000  | 6.015346000  | 0.001871000  |
|                                                                                                                                  | H | 5.213821000  | 4.901170000  | -0.002220000 |
|                                                                                                                                  | H | 6.379409000  | 0.326997000  | 0.871481000  |
|                                                                                                                                  | C | -3.584146000 | 1.708458000  | 0.042413000  |
|                                                                                                                                  | C | 0.617410000  | 1.120935000  | -0.060197000 |
|                                                                                                                                  | C | 4.817158000  | 0.565395000  | -0.177260000 |
|                                                                                                                                  | C | -4.992014000 | 1.902806000  | 0.071190000  |
|                                                                                                                                  | C | -0.779067000 | 1.315406000  | -0.034700000 |
|                                                                                                                                  | C | 3.425350000  | 0.739543000  | -0.143766000 |
|                                                                                                                                  | C | -5.500225000 | 3.239211000  | 0.084590000  |
|                                                                                                                                  | C | -1.314918000 | 2.631802000  | -0.006551000 |
|                                                                                                                                  | C | 2.882985000  | 2.050356000  | -0.105229000 |
|                                                                                                                                  | C | -2.714128000 | 2.826087000  | 0.015629000  |
|                                                                                                                                  | C | 1.484061000  | 2.243572000  | -0.084376000 |
|                                                                                                                                  | C | 5.661459000  | 1.684646000  | -0.160348000 |
|                                                                                                                                  | C | -3.246323000 | 4.145294000  | 0.036414000  |
|                                                                                                                                  | C | 0.950467000  | 3.553344000  | -0.053128000 |
|                                                                                                                                  | C | 5.141359000  | 2.958004000  | -0.131023000 |
|                                                                                                                                  | C | -4.665686000 | 4.311180000  | 0.067836000  |
|                                                                                                                                  | C | -0.449635000 | 3.747559000  | -0.031322000 |
|                                                                                                                                  | C | 3.747121000  | 3.176930000  | -0.112538000 |
|                                                                                                                                  | C | -0.991146000 | 5.067327000  | -0.008021000 |
|                                                                                                                                  | C | 3.195764000  | 4.473185000  | -0.091249000 |
|                                                                                                                                  | C | -2.371215000 | 5.237183000  | 0.021855000  |
|                                                                                                                                  | C | 1.827283000  | 4.682137000  | -0.066876000 |
| 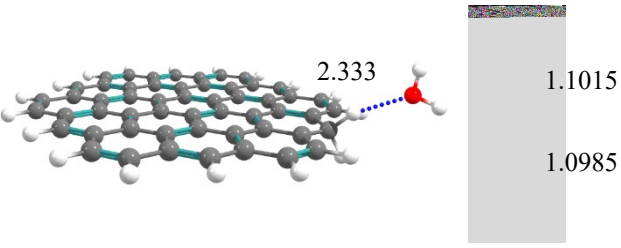 <p><b>DbcH<sup>+</sup>-W<sub>1</sub></b></p> |   |              |              |              |

|  |   |              |              |              |
|--|---|--------------|--------------|--------------|
|  | C | 1.255122000  | 5.998314000  | -0.047360000 |
|  | C | -0.086490000 | 6.180577000  | -0.020622000 |
|  | C | -0.462287000 | -6.179852000 | 0.000340000  |
|  | C | -1.801618000 | -5.983522000 | 0.030428000  |
|  | C | -2.362952000 | -4.663179000 | 0.034213000  |
|  | C | 1.823900000  | -5.251727000 | -0.062380000 |
|  | C | -3.735789000 | -4.444612000 | 0.065436000  |
|  | C | 0.451743000  | -5.073405000 | -0.031126000 |
|  | C | -4.275024000 | -3.153005000 | 0.070099000  |
|  | C | -0.078366000 | -3.745582000 | -0.024349000 |
|  | C | 4.111517000  | -4.334806000 | -0.130105000 |
|  | C | -5.684715000 | -2.919892000 | 0.101982000  |
|  | C | -1.477521000 | -3.544856000 | -0.000109000 |
|  | C | 2.712152000  | -4.158362000 | -0.095476000 |
|  | C | -6.190433000 | -1.658775000 | 0.108103000  |
|  | C | -2.000523000 | -2.233180000 | 0.015122000  |
|  | C | 2.194432000  | -2.836144000 | -0.090052000 |
|  | C | -3.398969000 | -2.032788000 | 0.037981000  |
|  | C | 0.796466000  | -2.634820000 | -0.065640000 |
|  | C | 4.960827000  | -3.253526000 | -0.170511000 |
|  | C | -3.926151000 | -0.717927000 | 0.053809000  |
|  | C | 0.273911000  | -1.316002000 | -0.049935000 |
|  | C | 4.463834000  | -1.942915000 | -0.176371000 |
|  | C | -5.332699000 | -0.515302000 | 0.082744000  |
|  | C | -1.121667000 | -1.116590000 | -0.023900000 |
|  | C | 3.078312000  | -1.726584000 | -0.136537000 |
|  | C | -5.832776000 | 0.788455000  | 0.091998000  |
|  | C | -1.650489000 | 0.198348000  | -0.004147000 |
|  | C | 2.549249000  | -0.394119000 | -0.118217000 |
|  | C | -3.055130000 | 0.396461000  | 0.019175000  |
|  | C | 1.155413000  | -0.197743000 | -0.087375000 |
|  | C | 5.409234000  | -0.797301000 | -0.256321000 |
|  | H | -7.264000000 | -1.500309000 | 0.132598000  |
|  | H | -6.908483000 | 0.940140000  | 0.115354000  |
|  | H | -6.575745000 | 3.383888000  | 0.108720000  |
|  | H | 6.735041000  | 1.525462000  | -0.153589000 |
|  | H | 6.204481000  | -0.893441000 | 0.495457000  |
|  | H | 6.034787000  | -3.409701000 | -0.197918000 |
|  | H | 5.807455000  | 3.815517000  | -0.120933000 |
|  | H | 3.865858000  | 5.328312000  | -0.097029000 |
|  | H | 1.925406000  | 6.851935000  | -0.055689000 |
|  | H | -0.503031000 | 7.182718000  | -0.006457000 |
|  | H | -2.781631000 | 6.242619000  | 0.037339000  |
|  | H | -5.068891000 | 5.318724000  | 0.079474000  |
|  | H | -6.350758000 | -3.776520000 | 0.122569000  |
|  | H | -4.408244000 | -5.297143000 | 0.089498000  |
|  | H | -2.479223000 | -6.831053000 | 0.053624000  |
|  | H | -0.054264000 | -7.185583000 | -0.001784000 |
|  | H | 2.231294000  | -6.258817000 | -0.065263000 |
|  | H | 4.515023000  | -5.342731000 | -0.126384000 |
|  | H | 5.952917000  | -0.872010000 | -1.211481000 |
|  | O | 8.268497000  | 0.009021000  | 1.104441000  |
|  | H | 9.125598000  | -0.293806000 | 0.795597000  |
|  | H | 8.421865000  | 0.303623000  | 2.005302000  |
|  | C | -3.989271000 | -1.223226000 | -0.020671000 |
|  | C | 0.254847000  | -1.229748000 | -0.024064000 |

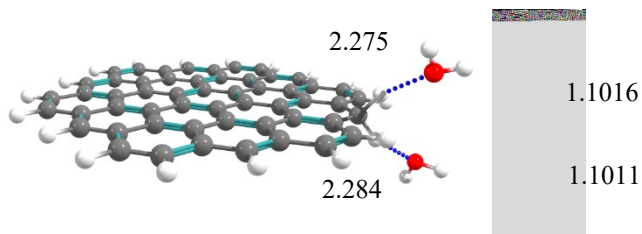

**DbcH<sup>+</sup>-W<sub>2</sub>**

|   |              |              |              |
|---|--------------|--------------|--------------|
| C | 4.493683000  | -1.264791000 | -0.017117000 |
| C | -5.410795000 | -1.218553000 | -0.015024000 |
| C | -1.155442000 | -1.226997000 | -0.013454000 |
| C | 3.090311000  | -1.245292000 | -0.017067000 |
| C | -6.101038000 | -2.470679000 | -0.035654000 |
| C | -1.870833000 | -2.455253000 | -0.043621000 |
| C | 2.368822000  | -2.467431000 | -0.039813000 |
| C | -3.283668000 | -2.451881000 | -0.032654000 |
| C | 0.956494000  | -2.463056000 | -0.030752000 |
| C | 5.171301000  | -2.494026000 | -0.012857000 |
| C | -3.995474000 | -3.683318000 | -0.057044000 |
| C | 0.244356000  | -3.684774000 | -0.059124000 |
| C | 4.479113000  | -3.681463000 | -0.031743000 |
| C | -5.424622000 | -3.648642000 | -0.055513000 |
| C | -1.169825000 | -3.681133000 | -0.051808000 |
| C | 3.066730000  | -3.703832000 | -0.046445000 |
| C | -1.890912000 | -4.911591000 | -0.076077000 |
| C | 2.339646000  | -4.909384000 | -0.065524000 |
| C | -3.281741000 | -4.886556000 | -0.076374000 |
| C | 0.954603000  | -4.924772000 | -0.070717000 |
| C | 0.203544000  | -6.147518000 | -0.091223000 |
| C | -1.150758000 | -6.140220000 | -0.093656000 |
| C | 0.207975000  | 6.147999000  | 0.081396000  |
| C | -1.146342000 | 6.141671000  | 0.086062000  |
| C | -1.887380000 | 4.913564000  | 0.070866000  |
| C | 2.343163000  | 4.908327000  | 0.052852000  |
| C | -3.278253000 | 4.889502000  | 0.073150000  |
| C | 0.958123000  | 4.924688000  | 0.062670000  |
| C | -3.992836000 | 3.686745000  | 0.057504000  |
| C | 0.246967000  | 3.685312000  | 0.045433000  |
| C | 4.481638000  | 3.678936000  | 0.011327000  |
| C | -5.422024000 | 3.653036000  | 0.059323000  |
| C | -1.167180000 | 3.682426000  | 0.057750000  |
| C | 3.069359000  | 3.702280000  | 0.033258000  |
| C | -6.099280000 | 2.475518000  | 0.042810000  |
| C | -1.869098000 | 2.457321000  | 0.031489000  |
| C | 2.370525000  | 2.466451000  | 0.022403000  |
| C | -3.281913000 | 2.454615000  | 0.043708000  |
| C | 0.958276000  | 2.462785000  | 0.038647000  |
| C | 5.173122000  | 2.491076000  | -0.008017000 |
| C | -3.988394000 | 1.226687000  | 0.017905000  |
| C | 0.255712000  | 1.230276000  | 0.012973000  |
| C | 4.494584000  | 1.262384000  | 0.001926000  |
| C | -5.409934000 | 1.222855000  | 0.023688000  |
| C | -1.154592000 | 1.228201000  | 0.024326000  |
| C | 3.091188000  | 1.243661000  | 0.015243000  |
| C | -6.087637000 | 0.002394000  | 0.005113000  |
| C | -1.862333000 | 0.001000000  | -0.003325000 |
| C | 2.381253000  | -0.000430000 | -0.008290000 |
| C | -3.281501000 | 0.001314000  | 0.009045000  |
| C | 0.972117000  | -0.000122000 | 0.003679000  |
| C | 5.271135000  | -0.001525000 | -0.004046000 |
| H | -7.184755000 | 2.468941000  | 0.044377000  |
| H | -7.174238000 | 0.002731000  | 0.008120000  |
| H | -7.186510000 | -2.463370000 | -0.034495000 |
| H | 6.255620000  | -2.488990000 | 0.022547000  |

|                                                                                                                                  |   |              |              |              |
|----------------------------------------------------------------------------------------------------------------------------------|---|--------------|--------------|--------------|
|                                                                                                                                  | H | 5.967356000  | 0.022876000  | -0.856826000 |
|                                                                                                                                  | H | 6.257221000  | 2.484799000  | -0.050466000 |
|                                                                                                                                  | H | 5.018276000  | -4.624105000 | -0.031649000 |
|                                                                                                                                  | H | 2.883217000  | -5.850057000 | -0.073475000 |
|                                                                                                                                  | H | 0.747714000  | -7.086565000 | -0.104090000 |
|                                                                                                                                  | H | -1.703581000 | -7.074135000 | -0.109534000 |
|                                                                                                                                  | H | -3.829010000 | -5.824564000 | -0.093642000 |
|                                                                                                                                  | H | -5.965066000 | -4.589704000 | -0.071291000 |
|                                                                                                                                  | H | -5.961789000 | 4.594518000  | 0.073235000  |
|                                                                                                                                  | H | -3.824843000 | 5.827992000  | 0.084786000  |
|                                                                                                                                  | H | -1.698478000 | 7.076023000  | 0.099995000  |
|                                                                                                                                  | H | 0.752829000  | 7.086673000  | 0.092426000  |
|                                                                                                                                  | H | 2.887427000  | 5.848592000  | 0.061672000  |
|                                                                                                                                  | H | 5.021375000  | 4.621242000  | 0.007469000  |
|                                                                                                                                  | H | 5.951681000  | -0.027022000 | 0.861867000  |
|                                                                                                                                  | O | 7.542374000  | 1.255260000  | -1.960115000 |
|                                                                                                                                  | H | 8.451699000  | 0.966060000  | -2.063824000 |
|                                                                                                                                  | H | 7.326461000  | 1.690897000  | -2.787884000 |
|                                                                                                                                  | O | 7.457006000  | -1.268067000 | 2.033027000  |
|                                                                                                                                  | H | 8.355301000  | -0.980306000 | 2.210494000  |
|                                                                                                                                  | H | 7.183998000  | -1.728937000 | 2.829661000  |
|                                                                                                                                  | C | 4.288217000  | 1.226718000  | 0.011680000  |
|                                                                                                                                  | C | 0.043825000  | 1.229640000  | 0.008354000  |
|                                                                                                                                  | C | -4.195322000 | 1.261486000  | -0.003335000 |
|                                                                                                                                  | C | 5.709817000  | 1.223042000  | 0.016850000  |
|                                                                                                                                  | C | 1.454250000  | 1.227855000  | 0.019156000  |
|                                                                                                                                  | C | -2.791808000 | 1.242771000  | 0.010580000  |
|                                                                                                                                  | C | 6.398889000  | 2.476020000  | 0.030025000  |
|                                                                                                                                  | C | 2.168637000  | 2.457170000  | 0.020719000  |
|                                                                                                                                  | C | -2.071156000 | 2.465566000  | 0.012894000  |
|                                                                                                                                  | C | 3.581476000  | 2.454753000  | 0.032277000  |
|                                                                                                                                  | C | -0.658996000 | 2.462257000  | 0.028926000  |
|                                                                                                                                  | C | -4.875429000 | 2.489820000  | -0.020456000 |
|                                                                                                                                  | C | 4.292139000  | 3.687058000  | 0.040257000  |
|                                                                                                                                  | C | 0.052101000  | 3.684785000  | 0.030152000  |
|                                                                                                                                  | C | -4.183141000 | 3.676900000  | -0.005779000 |
|                                                                                                                                  | C | 5.721469000  | 3.653404000  | 0.041566000  |
|                                                                                                                                  | C | 1.466503000  | 3.682243000  | 0.041811000  |
|                                                                                                                                  | C | -2.770466000 | 3.701042000  | 0.017604000  |
|                                                                                                                                  | C | 2.186382000  | 4.913418000  | 0.049132000  |
|                                                                                                                                  | C | -2.044604000 | 4.906918000  | 0.031744000  |
|                                                                                                                                  | C | 3.577437000  | 4.889596000  | 0.050822000  |
|                                                                                                                                  | C | -0.659292000 | 4.923807000  | 0.041651000  |
|                                                                                                                                  | C | 0.090621000  | 6.147216000  | 0.054511000  |
|                                                                                                                                  | C | 1.445022000  | 6.141329000  | 0.058838000  |
|                                                                                                                                  | C | 0.096322000  | -6.147646000 | -0.057952000 |
|                                                                                                                                  | C | 1.450718000  | -6.140502000 | -0.061679000 |
|                                                                                                                                  | C | 2.190932000  | -4.911904000 | -0.051382000 |
|                                                                                                                                  | C | -2.040066000 | -4.909325000 | -0.036641000 |
|                                                                                                                                  | C | 3.581964000  | -4.886797000 | -0.052609000 |
|                                                                                                                                  | C | -0.654725000 | -4.924948000 | -0.043621000 |
|                                                                                                                                  | C | 4.295554000  | -3.683620000 | -0.039885000 |
|                                                                                                                                  | C | 0.055492000  | -3.685200000 | -0.039598000 |
|                                                                                                                                  | C | -4.179823000 | -3.681243000 | -0.005744000 |
|                                                                                                                                  | C | 5.724853000  | -3.648659000 | -0.039245000 |
|                                                                                                                                  | C | 1.469925000  | -3.681500000 | -0.033264000 |
| 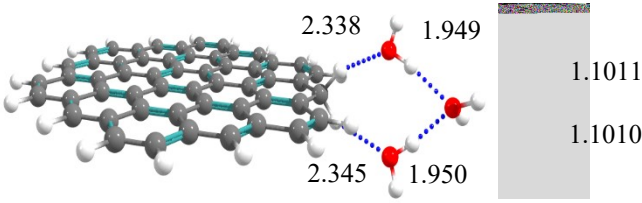 <p><b>DbcH<sup>+</sup>-W<sub>3</sub></b></p> |   |              |              |              |

|   |               |              |              |
|---|---------------|--------------|--------------|
| C | -2.767051000  | -3.704108000 | -0.023812000 |
| C | 6.401182000   | -2.470672000 | -0.025503000 |
| C | 2.170908000   | -2.455586000 | -0.031638000 |
| C | -2.068921000  | -2.467950000 | -0.025290000 |
| C | 3.583754000   | -2.452086000 | -0.021344000 |
| C | -0.656693000  | -2.463508000 | -0.017379000 |
| C | -4.873188000  | -2.494785000 | 0.006968000  |
| C | 4.289352000   | -1.223234000 | -0.015616000 |
| C | 0.044960000   | -1.230053000 | -0.017277000 |
| C | -4.194177000  | -1.265823000 | -0.007704000 |
| C | 5.710949000   | -1.218353000 | -0.010600000 |
| C | 1.455388000   | -1.227173000 | -0.007243000 |
| C | -2.790632000  | -1.245882000 | -0.009496000 |
| C | 6.387660000   | 0.002654000  | 0.003591000  |
| C | 2.162056000   | 0.000767000  | -0.003116000 |
| C | -2.081995000  | -0.001159000 | -0.006898000 |
| C | 3.581509000   | 0.001296000  | 0.008687000  |
| C | -0.672266000  | -0.000630000 | 0.004823000  |
| C | -4.970642000  | -0.002525000 | -0.005271000 |
| H | 7.486674000   | -2.463257000 | -0.024888000 |
| H | 7.474274000   | 0.003130000  | 0.006150000  |
| H | 7.484387000   | 2.469592000  | 0.031126000  |
| H | -5.959521000  | 2.478197000  | -0.068102000 |
| H | -5.957468000  | -2.484365000 | 0.049690000  |
| H | -4.722389000  | 4.619503000  | -0.016521000 |
| H | -2.589009000  | 5.847165000  | 0.035575000  |
| H | -0.454460000  | 7.085835000  | 0.061113000  |
| H | 1.996935000   | 7.075895000  | 0.068194000  |
| H | 4.123831000   | 5.828274000  | 0.057940000  |
| H | 6.261071000   | 4.595066000  | 0.051011000  |
| H | 6.265328000   | -4.589799000 | -0.050615000 |
| H | 4.129221000   | -5.824915000 | -0.065212000 |
| H | 2.003498000   | -7.074536000 | -0.072760000 |
| H | -0.447886000  | -7.086769000 | -0.064904000 |
| H | -2.583587000  | -5.850091000 | -0.037796000 |
| H | -4.718251000  | -4.624325000 | 0.003863000  |
| H | -5.666596000  | -0.022027000 | 0.847889000  |
| H | -5.669614000  | 0.016018000  | -0.855750000 |
| O | -7.600508000  | -1.228080000 | 1.373246000  |
| H | -8.405946000  | -0.832841000 | 1.013507000  |
| H | -7.847162000  | -1.581100000 | 2.229971000  |
| H | -7.870444000  | 1.573966000  | -2.218443000 |
| H | -8.416146000  | 0.830493000  | -0.993153000 |
| O | -7.614527000  | 1.223992000  | -1.363180000 |
| H | -10.446039000 | -0.615453000 | -0.429916000 |
| H | -10.437324000 | 0.620698000  | 0.477173000  |
| O | -9.861541000  | 0.001298000  | 0.019858000  |





**Table S4:** PBE0/6-311++G\*\* optimized equilibrium structures of BzH<sup>+</sup>, CorH<sup>+</sup> and DbcH<sup>+</sup> and of the most stable forms of the BzH<sup>+</sup>-W<sub>n</sub>, CorH<sup>+</sup>-W<sub>n</sub> and DbcH<sup>+</sup>-W<sub>n</sub> (n = 1 – 3) complexes. Close view of the sp<sup>3</sup> C-H bond distances (before and after hydration) and the intermonomer distances (in Å) are given.

|                                                                                                                                                             |                                                                                                                                                                                                                                                                                                                                                                                                                                                                                                                                                                                                                                                                                                                                                                                                                                                                                                                                                                                                                                                                                                                                                                                                                                                                                                                                                                                                                                                                                                                                                                                                                                                    |              |              |             |              |   |              |             |              |   |              |              |              |   |              |             |             |   |              |              |              |   |              |             |              |   |              |              |              |   |              |             |              |   |              |              |              |   |              |              |              |   |              |              |              |   |              |             |              |   |              |              |              |   |              |              |              |   |              |             |              |   |              |              |              |   |             |              |             |   |             |              |              |   |             |              |             |
|-------------------------------------------------------------------------------------------------------------------------------------------------------------|----------------------------------------------------------------------------------------------------------------------------------------------------------------------------------------------------------------------------------------------------------------------------------------------------------------------------------------------------------------------------------------------------------------------------------------------------------------------------------------------------------------------------------------------------------------------------------------------------------------------------------------------------------------------------------------------------------------------------------------------------------------------------------------------------------------------------------------------------------------------------------------------------------------------------------------------------------------------------------------------------------------------------------------------------------------------------------------------------------------------------------------------------------------------------------------------------------------------------------------------------------------------------------------------------------------------------------------------------------------------------------------------------------------------------------------------------------------------------------------------------------------------------------------------------------------------------------------------------------------------------------------------------|--------------|--------------|-------------|--------------|---|--------------|-------------|--------------|---|--------------|--------------|--------------|---|--------------|-------------|-------------|---|--------------|--------------|--------------|---|--------------|-------------|--------------|---|--------------|--------------|--------------|---|--------------|-------------|--------------|---|--------------|--------------|--------------|---|--------------|--------------|--------------|---|--------------|--------------|--------------|---|--------------|-------------|--------------|---|--------------|--------------|--------------|---|--------------|--------------|--------------|---|--------------|-------------|--------------|---|--------------|--------------|--------------|---|-------------|--------------|-------------|---|-------------|--------------|--------------|---|-------------|--------------|-------------|
| 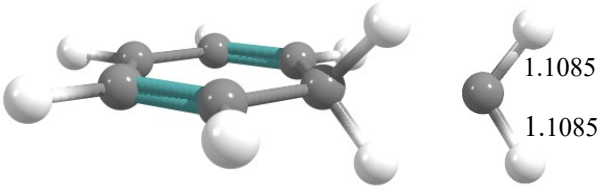 <p style="text-align: center;"><b>BzH<sup>+</sup></b></p>                 | <table border="1"> <tbody> <tr><td>C</td><td>1.386622000</td><td>0.000000000</td><td>-0.000119000</td></tr> <tr><td>C</td><td>0.627961000</td><td>1.248046000</td><td>0.000148000</td></tr> <tr><td>C</td><td>0.627961000</td><td>-1.248046000</td><td>0.000148000</td></tr> <tr><td>H</td><td>1.178365000</td><td>2.184561000</td><td>0.000223000</td></tr> <tr><td>H</td><td>1.178366000</td><td>-2.184561000</td><td>0.000223000</td></tr> <tr><td>C</td><td>-0.738149000</td><td>1.236257000</td><td>0.000080000</td></tr> <tr><td>C</td><td>-0.738149000</td><td>-1.236257000</td><td>0.000080000</td></tr> <tr><td>H</td><td>-1.306843000</td><td>2.158876000</td><td>0.000223000</td></tr> <tr><td>H</td><td>-1.306843000</td><td>-2.158877000</td><td>0.000223000</td></tr> <tr><td>C</td><td>-1.408235000</td><td>0.000000000</td><td>-0.000188000</td></tr> <tr><td>H</td><td>-2.495570000</td><td>0.000000000</td><td>-0.000363000</td></tr> <tr><td>H</td><td>2.101559000</td><td>0.000000000</td><td>-0.847298000</td></tr> <tr><td>H</td><td>2.102891000</td><td>0.000000000</td><td>0.845881000</td></tr> </tbody> </table>                                                                                                                                                                                                                                                                                                                                                                                                                                                                                                         | C            | 1.386622000  | 0.000000000 | -0.000119000 | C | 0.627961000  | 1.248046000 | 0.000148000  | C | 0.627961000  | -1.248046000 | 0.000148000  | H | 1.178365000  | 2.184561000 | 0.000223000 | H | 1.178366000  | -2.184561000 | 0.000223000  | C | -0.738149000 | 1.236257000 | 0.000080000  | C | -0.738149000 | -1.236257000 | 0.000080000  | H | -1.306843000 | 2.158876000 | 0.000223000  | H | -1.306843000 | -2.158877000 | 0.000223000  | C | -1.408235000 | 0.000000000  | -0.000188000 | H | -2.495570000 | 0.000000000  | -0.000363000 | H | 2.101559000  | 0.000000000 | -0.847298000 | H | 2.102891000  | 0.000000000  | 0.845881000  |   |              |              |              |   |              |             |              |   |              |              |              |   |             |              |             |   |             |              |              |   |             |              |             |
| C                                                                                                                                                           | 1.386622000                                                                                                                                                                                                                                                                                                                                                                                                                                                                                                                                                                                                                                                                                                                                                                                                                                                                                                                                                                                                                                                                                                                                                                                                                                                                                                                                                                                                                                                                                                                                                                                                                                        | 0.000000000  | -0.000119000 |             |              |   |              |             |              |   |              |              |              |   |              |             |             |   |              |              |              |   |              |             |              |   |              |              |              |   |              |             |              |   |              |              |              |   |              |              |              |   |              |              |              |   |              |             |              |   |              |              |              |   |              |              |              |   |              |             |              |   |              |              |              |   |             |              |             |   |             |              |              |   |             |              |             |
| C                                                                                                                                                           | 0.627961000                                                                                                                                                                                                                                                                                                                                                                                                                                                                                                                                                                                                                                                                                                                                                                                                                                                                                                                                                                                                                                                                                                                                                                                                                                                                                                                                                                                                                                                                                                                                                                                                                                        | 1.248046000  | 0.000148000  |             |              |   |              |             |              |   |              |              |              |   |              |             |             |   |              |              |              |   |              |             |              |   |              |              |              |   |              |             |              |   |              |              |              |   |              |              |              |   |              |              |              |   |              |             |              |   |              |              |              |   |              |              |              |   |              |             |              |   |              |              |              |   |             |              |             |   |             |              |              |   |             |              |             |
| C                                                                                                                                                           | 0.627961000                                                                                                                                                                                                                                                                                                                                                                                                                                                                                                                                                                                                                                                                                                                                                                                                                                                                                                                                                                                                                                                                                                                                                                                                                                                                                                                                                                                                                                                                                                                                                                                                                                        | -1.248046000 | 0.000148000  |             |              |   |              |             |              |   |              |              |              |   |              |             |             |   |              |              |              |   |              |             |              |   |              |              |              |   |              |             |              |   |              |              |              |   |              |              |              |   |              |              |              |   |              |             |              |   |              |              |              |   |              |              |              |   |              |             |              |   |              |              |              |   |             |              |             |   |             |              |              |   |             |              |             |
| H                                                                                                                                                           | 1.178365000                                                                                                                                                                                                                                                                                                                                                                                                                                                                                                                                                                                                                                                                                                                                                                                                                                                                                                                                                                                                                                                                                                                                                                                                                                                                                                                                                                                                                                                                                                                                                                                                                                        | 2.184561000  | 0.000223000  |             |              |   |              |             |              |   |              |              |              |   |              |             |             |   |              |              |              |   |              |             |              |   |              |              |              |   |              |             |              |   |              |              |              |   |              |              |              |   |              |              |              |   |              |             |              |   |              |              |              |   |              |              |              |   |              |             |              |   |              |              |              |   |             |              |             |   |             |              |              |   |             |              |             |
| H                                                                                                                                                           | 1.178366000                                                                                                                                                                                                                                                                                                                                                                                                                                                                                                                                                                                                                                                                                                                                                                                                                                                                                                                                                                                                                                                                                                                                                                                                                                                                                                                                                                                                                                                                                                                                                                                                                                        | -2.184561000 | 0.000223000  |             |              |   |              |             |              |   |              |              |              |   |              |             |             |   |              |              |              |   |              |             |              |   |              |              |              |   |              |             |              |   |              |              |              |   |              |              |              |   |              |              |              |   |              |             |              |   |              |              |              |   |              |              |              |   |              |             |              |   |              |              |              |   |             |              |             |   |             |              |              |   |             |              |             |
| C                                                                                                                                                           | -0.738149000                                                                                                                                                                                                                                                                                                                                                                                                                                                                                                                                                                                                                                                                                                                                                                                                                                                                                                                                                                                                                                                                                                                                                                                                                                                                                                                                                                                                                                                                                                                                                                                                                                       | 1.236257000  | 0.000080000  |             |              |   |              |             |              |   |              |              |              |   |              |             |             |   |              |              |              |   |              |             |              |   |              |              |              |   |              |             |              |   |              |              |              |   |              |              |              |   |              |              |              |   |              |             |              |   |              |              |              |   |              |              |              |   |              |             |              |   |              |              |              |   |             |              |             |   |             |              |              |   |             |              |             |
| C                                                                                                                                                           | -0.738149000                                                                                                                                                                                                                                                                                                                                                                                                                                                                                                                                                                                                                                                                                                                                                                                                                                                                                                                                                                                                                                                                                                                                                                                                                                                                                                                                                                                                                                                                                                                                                                                                                                       | -1.236257000 | 0.000080000  |             |              |   |              |             |              |   |              |              |              |   |              |             |             |   |              |              |              |   |              |             |              |   |              |              |              |   |              |             |              |   |              |              |              |   |              |              |              |   |              |              |              |   |              |             |              |   |              |              |              |   |              |              |              |   |              |             |              |   |              |              |              |   |             |              |             |   |             |              |              |   |             |              |             |
| H                                                                                                                                                           | -1.306843000                                                                                                                                                                                                                                                                                                                                                                                                                                                                                                                                                                                                                                                                                                                                                                                                                                                                                                                                                                                                                                                                                                                                                                                                                                                                                                                                                                                                                                                                                                                                                                                                                                       | 2.158876000  | 0.000223000  |             |              |   |              |             |              |   |              |              |              |   |              |             |             |   |              |              |              |   |              |             |              |   |              |              |              |   |              |             |              |   |              |              |              |   |              |              |              |   |              |              |              |   |              |             |              |   |              |              |              |   |              |              |              |   |              |             |              |   |              |              |              |   |             |              |             |   |             |              |              |   |             |              |             |
| H                                                                                                                                                           | -1.306843000                                                                                                                                                                                                                                                                                                                                                                                                                                                                                                                                                                                                                                                                                                                                                                                                                                                                                                                                                                                                                                                                                                                                                                                                                                                                                                                                                                                                                                                                                                                                                                                                                                       | -2.158877000 | 0.000223000  |             |              |   |              |             |              |   |              |              |              |   |              |             |             |   |              |              |              |   |              |             |              |   |              |              |              |   |              |             |              |   |              |              |              |   |              |              |              |   |              |              |              |   |              |             |              |   |              |              |              |   |              |              |              |   |              |             |              |   |              |              |              |   |             |              |             |   |             |              |              |   |             |              |             |
| C                                                                                                                                                           | -1.408235000                                                                                                                                                                                                                                                                                                                                                                                                                                                                                                                                                                                                                                                                                                                                                                                                                                                                                                                                                                                                                                                                                                                                                                                                                                                                                                                                                                                                                                                                                                                                                                                                                                       | 0.000000000  | -0.000188000 |             |              |   |              |             |              |   |              |              |              |   |              |             |             |   |              |              |              |   |              |             |              |   |              |              |              |   |              |             |              |   |              |              |              |   |              |              |              |   |              |              |              |   |              |             |              |   |              |              |              |   |              |              |              |   |              |             |              |   |              |              |              |   |             |              |             |   |             |              |              |   |             |              |             |
| H                                                                                                                                                           | -2.495570000                                                                                                                                                                                                                                                                                                                                                                                                                                                                                                                                                                                                                                                                                                                                                                                                                                                                                                                                                                                                                                                                                                                                                                                                                                                                                                                                                                                                                                                                                                                                                                                                                                       | 0.000000000  | -0.000363000 |             |              |   |              |             |              |   |              |              |              |   |              |             |             |   |              |              |              |   |              |             |              |   |              |              |              |   |              |             |              |   |              |              |              |   |              |              |              |   |              |              |              |   |              |             |              |   |              |              |              |   |              |              |              |   |              |             |              |   |              |              |              |   |             |              |             |   |             |              |              |   |             |              |             |
| H                                                                                                                                                           | 2.101559000                                                                                                                                                                                                                                                                                                                                                                                                                                                                                                                                                                                                                                                                                                                                                                                                                                                                                                                                                                                                                                                                                                                                                                                                                                                                                                                                                                                                                                                                                                                                                                                                                                        | 0.000000000  | -0.847298000 |             |              |   |              |             |              |   |              |              |              |   |              |             |             |   |              |              |              |   |              |             |              |   |              |              |              |   |              |             |              |   |              |              |              |   |              |              |              |   |              |              |              |   |              |             |              |   |              |              |              |   |              |              |              |   |              |             |              |   |              |              |              |   |             |              |             |   |             |              |              |   |             |              |             |
| H                                                                                                                                                           | 2.102891000                                                                                                                                                                                                                                                                                                                                                                                                                                                                                                                                                                                                                                                                                                                                                                                                                                                                                                                                                                                                                                                                                                                                                                                                                                                                                                                                                                                                                                                                                                                                                                                                                                        | 0.000000000  | 0.845881000  |             |              |   |              |             |              |   |              |              |              |   |              |             |             |   |              |              |              |   |              |             |              |   |              |              |              |   |              |             |              |   |              |              |              |   |              |              |              |   |              |              |              |   |              |             |              |   |              |              |              |   |              |              |              |   |              |             |              |   |              |              |              |   |             |              |             |   |             |              |              |   |             |              |             |
|  <p style="text-align: center;"><b>BzH<sup>+</sup>-W<sub>1</sub></b></p>  | <table border="1"> <tbody> <tr><td>C</td><td>-0.450725000</td><td>0.000075000</td><td>0.889358000</td></tr> <tr><td>C</td><td>0.201043000</td><td>1.239691000</td><td>0.524939000</td></tr> <tr><td>C</td><td>0.200920000</td><td>-1.239624000</td><td>0.525006000</td></tr> <tr><td>H</td><td>-0.254437000</td><td>2.175779000</td><td>0.833788000</td></tr> <tr><td>H</td><td>-0.254655000</td><td>-2.175650000</td><td>0.833902000</td></tr> <tr><td>C</td><td>1.337829000</td><td>1.230899000</td><td>-0.240861000</td></tr> <tr><td>C</td><td>1.337705000</td><td>-1.230983000</td><td>-0.240798000</td></tr> <tr><td>H</td><td>1.813979000</td><td>2.156040000</td><td>-0.544161000</td></tr> <tr><td>H</td><td>1.813758000</td><td>-2.156188000</td><td>-0.544052000</td></tr> <tr><td>C</td><td>1.897210000</td><td>-0.000080000</td><td>-0.614285000</td></tr> <tr><td>H</td><td>2.802572000</td><td>-0.000142000</td><td>-1.215594000</td></tr> <tr><td>H</td><td>-0.919460000</td><td>0.000137000</td><td>1.882038000</td></tr> <tr><td>H</td><td>-1.416099000</td><td>0.000093000</td><td>0.255982000</td></tr> <tr><td>O</td><td>-2.971055000</td><td>-0.000001000</td><td>-0.601961000</td></tr> <tr><td>H</td><td>-3.119273000</td><td>0.000159000</td><td>-1.551587000</td></tr> <tr><td>H</td><td>-3.841832000</td><td>-0.000094000</td><td>-0.194778000</td></tr> </tbody> </table>                                                                                                                                                                                                                                              | C            | -0.450725000 | 0.000075000 | 0.889358000  | C | 0.201043000  | 1.239691000 | 0.524939000  | C | 0.200920000  | -1.239624000 | 0.525006000  | H | -0.254437000 | 2.175779000 | 0.833788000 | H | -0.254655000 | -2.175650000 | 0.833902000  | C | 1.337829000  | 1.230899000 | -0.240861000 | C | 1.337705000  | -1.230983000 | -0.240798000 | H | 1.813979000  | 2.156040000 | -0.544161000 | H | 1.813758000  | -2.156188000 | -0.544052000 | C | 1.897210000  | -0.000080000 | -0.614285000 | H | 2.802572000  | -0.000142000 | -1.215594000 | H | -0.919460000 | 0.000137000 | 1.882038000  | H | -1.416099000 | 0.000093000  | 0.255982000  | O | -2.971055000 | -0.000001000 | -0.601961000 | H | -3.119273000 | 0.000159000 | -1.551587000 | H | -3.841832000 | -0.000094000 | -0.194778000 |   |             |              |             |   |             |              |              |   |             |              |             |
| C                                                                                                                                                           | -0.450725000                                                                                                                                                                                                                                                                                                                                                                                                                                                                                                                                                                                                                                                                                                                                                                                                                                                                                                                                                                                                                                                                                                                                                                                                                                                                                                                                                                                                                                                                                                                                                                                                                                       | 0.000075000  | 0.889358000  |             |              |   |              |             |              |   |              |              |              |   |              |             |             |   |              |              |              |   |              |             |              |   |              |              |              |   |              |             |              |   |              |              |              |   |              |              |              |   |              |              |              |   |              |             |              |   |              |              |              |   |              |              |              |   |              |             |              |   |              |              |              |   |             |              |             |   |             |              |              |   |             |              |             |
| C                                                                                                                                                           | 0.201043000                                                                                                                                                                                                                                                                                                                                                                                                                                                                                                                                                                                                                                                                                                                                                                                                                                                                                                                                                                                                                                                                                                                                                                                                                                                                                                                                                                                                                                                                                                                                                                                                                                        | 1.239691000  | 0.524939000  |             |              |   |              |             |              |   |              |              |              |   |              |             |             |   |              |              |              |   |              |             |              |   |              |              |              |   |              |             |              |   |              |              |              |   |              |              |              |   |              |              |              |   |              |             |              |   |              |              |              |   |              |              |              |   |              |             |              |   |              |              |              |   |             |              |             |   |             |              |              |   |             |              |             |
| C                                                                                                                                                           | 0.200920000                                                                                                                                                                                                                                                                                                                                                                                                                                                                                                                                                                                                                                                                                                                                                                                                                                                                                                                                                                                                                                                                                                                                                                                                                                                                                                                                                                                                                                                                                                                                                                                                                                        | -1.239624000 | 0.525006000  |             |              |   |              |             |              |   |              |              |              |   |              |             |             |   |              |              |              |   |              |             |              |   |              |              |              |   |              |             |              |   |              |              |              |   |              |              |              |   |              |              |              |   |              |             |              |   |              |              |              |   |              |              |              |   |              |             |              |   |              |              |              |   |             |              |             |   |             |              |              |   |             |              |             |
| H                                                                                                                                                           | -0.254437000                                                                                                                                                                                                                                                                                                                                                                                                                                                                                                                                                                                                                                                                                                                                                                                                                                                                                                                                                                                                                                                                                                                                                                                                                                                                                                                                                                                                                                                                                                                                                                                                                                       | 2.175779000  | 0.833788000  |             |              |   |              |             |              |   |              |              |              |   |              |             |             |   |              |              |              |   |              |             |              |   |              |              |              |   |              |             |              |   |              |              |              |   |              |              |              |   |              |              |              |   |              |             |              |   |              |              |              |   |              |              |              |   |              |             |              |   |              |              |              |   |             |              |             |   |             |              |              |   |             |              |             |
| H                                                                                                                                                           | -0.254655000                                                                                                                                                                                                                                                                                                                                                                                                                                                                                                                                                                                                                                                                                                                                                                                                                                                                                                                                                                                                                                                                                                                                                                                                                                                                                                                                                                                                                                                                                                                                                                                                                                       | -2.175650000 | 0.833902000  |             |              |   |              |             |              |   |              |              |              |   |              |             |             |   |              |              |              |   |              |             |              |   |              |              |              |   |              |             |              |   |              |              |              |   |              |              |              |   |              |              |              |   |              |             |              |   |              |              |              |   |              |              |              |   |              |             |              |   |              |              |              |   |             |              |             |   |             |              |              |   |             |              |             |
| C                                                                                                                                                           | 1.337829000                                                                                                                                                                                                                                                                                                                                                                                                                                                                                                                                                                                                                                                                                                                                                                                                                                                                                                                                                                                                                                                                                                                                                                                                                                                                                                                                                                                                                                                                                                                                                                                                                                        | 1.230899000  | -0.240861000 |             |              |   |              |             |              |   |              |              |              |   |              |             |             |   |              |              |              |   |              |             |              |   |              |              |              |   |              |             |              |   |              |              |              |   |              |              |              |   |              |              |              |   |              |             |              |   |              |              |              |   |              |              |              |   |              |             |              |   |              |              |              |   |             |              |             |   |             |              |              |   |             |              |             |
| C                                                                                                                                                           | 1.337705000                                                                                                                                                                                                                                                                                                                                                                                                                                                                                                                                                                                                                                                                                                                                                                                                                                                                                                                                                                                                                                                                                                                                                                                                                                                                                                                                                                                                                                                                                                                                                                                                                                        | -1.230983000 | -0.240798000 |             |              |   |              |             |              |   |              |              |              |   |              |             |             |   |              |              |              |   |              |             |              |   |              |              |              |   |              |             |              |   |              |              |              |   |              |              |              |   |              |              |              |   |              |             |              |   |              |              |              |   |              |              |              |   |              |             |              |   |              |              |              |   |             |              |             |   |             |              |              |   |             |              |             |
| H                                                                                                                                                           | 1.813979000                                                                                                                                                                                                                                                                                                                                                                                                                                                                                                                                                                                                                                                                                                                                                                                                                                                                                                                                                                                                                                                                                                                                                                                                                                                                                                                                                                                                                                                                                                                                                                                                                                        | 2.156040000  | -0.544161000 |             |              |   |              |             |              |   |              |              |              |   |              |             |             |   |              |              |              |   |              |             |              |   |              |              |              |   |              |             |              |   |              |              |              |   |              |              |              |   |              |              |              |   |              |             |              |   |              |              |              |   |              |              |              |   |              |             |              |   |              |              |              |   |             |              |             |   |             |              |              |   |             |              |             |
| H                                                                                                                                                           | 1.813758000                                                                                                                                                                                                                                                                                                                                                                                                                                                                                                                                                                                                                                                                                                                                                                                                                                                                                                                                                                                                                                                                                                                                                                                                                                                                                                                                                                                                                                                                                                                                                                                                                                        | -2.156188000 | -0.544052000 |             |              |   |              |             |              |   |              |              |              |   |              |             |             |   |              |              |              |   |              |             |              |   |              |              |              |   |              |             |              |   |              |              |              |   |              |              |              |   |              |              |              |   |              |             |              |   |              |              |              |   |              |              |              |   |              |             |              |   |              |              |              |   |             |              |             |   |             |              |              |   |             |              |             |
| C                                                                                                                                                           | 1.897210000                                                                                                                                                                                                                                                                                                                                                                                                                                                                                                                                                                                                                                                                                                                                                                                                                                                                                                                                                                                                                                                                                                                                                                                                                                                                                                                                                                                                                                                                                                                                                                                                                                        | -0.000080000 | -0.614285000 |             |              |   |              |             |              |   |              |              |              |   |              |             |             |   |              |              |              |   |              |             |              |   |              |              |              |   |              |             |              |   |              |              |              |   |              |              |              |   |              |              |              |   |              |             |              |   |              |              |              |   |              |              |              |   |              |             |              |   |              |              |              |   |             |              |             |   |             |              |              |   |             |              |             |
| H                                                                                                                                                           | 2.802572000                                                                                                                                                                                                                                                                                                                                                                                                                                                                                                                                                                                                                                                                                                                                                                                                                                                                                                                                                                                                                                                                                                                                                                                                                                                                                                                                                                                                                                                                                                                                                                                                                                        | -0.000142000 | -1.215594000 |             |              |   |              |             |              |   |              |              |              |   |              |             |             |   |              |              |              |   |              |             |              |   |              |              |              |   |              |             |              |   |              |              |              |   |              |              |              |   |              |              |              |   |              |             |              |   |              |              |              |   |              |              |              |   |              |             |              |   |              |              |              |   |             |              |             |   |             |              |              |   |             |              |             |
| H                                                                                                                                                           | -0.919460000                                                                                                                                                                                                                                                                                                                                                                                                                                                                                                                                                                                                                                                                                                                                                                                                                                                                                                                                                                                                                                                                                                                                                                                                                                                                                                                                                                                                                                                                                                                                                                                                                                       | 0.000137000  | 1.882038000  |             |              |   |              |             |              |   |              |              |              |   |              |             |             |   |              |              |              |   |              |             |              |   |              |              |              |   |              |             |              |   |              |              |              |   |              |              |              |   |              |              |              |   |              |             |              |   |              |              |              |   |              |              |              |   |              |             |              |   |              |              |              |   |             |              |             |   |             |              |              |   |             |              |             |
| H                                                                                                                                                           | -1.416099000                                                                                                                                                                                                                                                                                                                                                                                                                                                                                                                                                                                                                                                                                                                                                                                                                                                                                                                                                                                                                                                                                                                                                                                                                                                                                                                                                                                                                                                                                                                                                                                                                                       | 0.000093000  | 0.255982000  |             |              |   |              |             |              |   |              |              |              |   |              |             |             |   |              |              |              |   |              |             |              |   |              |              |              |   |              |             |              |   |              |              |              |   |              |              |              |   |              |              |              |   |              |             |              |   |              |              |              |   |              |              |              |   |              |             |              |   |              |              |              |   |             |              |             |   |             |              |              |   |             |              |             |
| O                                                                                                                                                           | -2.971055000                                                                                                                                                                                                                                                                                                                                                                                                                                                                                                                                                                                                                                                                                                                                                                                                                                                                                                                                                                                                                                                                                                                                                                                                                                                                                                                                                                                                                                                                                                                                                                                                                                       | -0.000001000 | -0.601961000 |             |              |   |              |             |              |   |              |              |              |   |              |             |             |   |              |              |              |   |              |             |              |   |              |              |              |   |              |             |              |   |              |              |              |   |              |              |              |   |              |              |              |   |              |             |              |   |              |              |              |   |              |              |              |   |              |             |              |   |              |              |              |   |             |              |             |   |             |              |              |   |             |              |             |
| H                                                                                                                                                           | -3.119273000                                                                                                                                                                                                                                                                                                                                                                                                                                                                                                                                                                                                                                                                                                                                                                                                                                                                                                                                                                                                                                                                                                                                                                                                                                                                                                                                                                                                                                                                                                                                                                                                                                       | 0.000159000  | -1.551587000 |             |              |   |              |             |              |   |              |              |              |   |              |             |             |   |              |              |              |   |              |             |              |   |              |              |              |   |              |             |              |   |              |              |              |   |              |              |              |   |              |              |              |   |              |             |              |   |              |              |              |   |              |              |              |   |              |             |              |   |              |              |              |   |             |              |             |   |             |              |              |   |             |              |             |
| H                                                                                                                                                           | -3.841832000                                                                                                                                                                                                                                                                                                                                                                                                                                                                                                                                                                                                                                                                                                                                                                                                                                                                                                                                                                                                                                                                                                                                                                                                                                                                                                                                                                                                                                                                                                                                                                                                                                       | -0.000094000 | -0.194778000 |             |              |   |              |             |              |   |              |              |              |   |              |             |             |   |              |              |              |   |              |             |              |   |              |              |              |   |              |             |              |   |              |              |              |   |              |              |              |   |              |              |              |   |              |             |              |   |              |              |              |   |              |              |              |   |              |             |              |   |              |              |              |   |             |              |             |   |             |              |              |   |             |              |             |
|  <p style="text-align: center;"><b>BzH<sup>+</sup>-W<sub>2</sub></b></p> | <table border="1"> <tbody> <tr><td>C</td><td>0.282768000</td><td>0.000165000</td><td>-0.000219000</td></tr> <tr><td>C</td><td>-0.464472000</td><td>0.000248000</td><td>1.236228000</td></tr> <tr><td>C</td><td>-0.464715000</td><td>0.000137000</td><td>-1.236518000</td></tr> <tr><td>H</td><td>0.087052000</td><td>0.000276000</td><td>2.171658000</td></tr> <tr><td>H</td><td>0.086624000</td><td>0.000069000</td><td>-2.172058000</td></tr> <tr><td>C</td><td>-1.835449000</td><td>0.000302000</td><td>1.230754000</td></tr> <tr><td>C</td><td>-1.835689000</td><td>0.000193000</td><td>-1.230772000</td></tr> <tr><td>H</td><td>-2.400318000</td><td>0.000368000</td><td>2.155724000</td></tr> <tr><td>H</td><td>-2.400740000</td><td>0.000171000</td><td>-2.155632000</td></tr> <tr><td>C</td><td>-2.508117000</td><td>0.000273000</td><td>0.000057000</td></tr> <tr><td>H</td><td>-3.594978000</td><td>0.000315000</td><td>0.000163000</td></tr> <tr><td>H</td><td>1.041781000</td><td>0.832740000</td><td>-0.000313000</td></tr> <tr><td>H</td><td>1.041792000</td><td>-0.832392000</td><td>-0.000268000</td></tr> <tr><td>O</td><td>2.281576000</td><td>2.280400000</td><td>-0.000059000</td></tr> <tr><td>H</td><td>3.241385000</td><td>2.243669000</td><td>0.000881000</td></tr> <tr><td>H</td><td>2.059768000</td><td>3.215115000</td><td>-0.000749000</td></tr> <tr><td>H</td><td>2.057464000</td><td>-3.215768000</td><td>0.001339000</td></tr> <tr><td>H</td><td>3.240041000</td><td>-2.245493000</td><td>-0.000536000</td></tr> <tr><td>O</td><td>2.280196000</td><td>-2.281273000</td><td>0.000386000</td></tr> </tbody> </table> | C            | 0.282768000  | 0.000165000 | -0.000219000 | C | -0.464472000 | 0.000248000 | 1.236228000  | C | -0.464715000 | 0.000137000  | -1.236518000 | H | 0.087052000  | 0.000276000 | 2.171658000 | H | 0.086624000  | 0.000069000  | -2.172058000 | C | -1.835449000 | 0.000302000 | 1.230754000  | C | -1.835689000 | 0.000193000  | -1.230772000 | H | -2.400318000 | 0.000368000 | 2.155724000  | H | -2.400740000 | 0.000171000  | -2.155632000 | C | -2.508117000 | 0.000273000  | 0.000057000  | H | -3.594978000 | 0.000315000  | 0.000163000  | H | 1.041781000  | 0.832740000 | -0.000313000 | H | 1.041792000  | -0.832392000 | -0.000268000 | O | 2.281576000  | 2.280400000  | -0.000059000 | H | 3.241385000  | 2.243669000 | 0.000881000  | H | 2.059768000  | 3.215115000  | -0.000749000 | H | 2.057464000 | -3.215768000 | 0.001339000 | H | 3.240041000 | -2.245493000 | -0.000536000 | O | 2.280196000 | -2.281273000 | 0.000386000 |
| C                                                                                                                                                           | 0.282768000                                                                                                                                                                                                                                                                                                                                                                                                                                                                                                                                                                                                                                                                                                                                                                                                                                                                                                                                                                                                                                                                                                                                                                                                                                                                                                                                                                                                                                                                                                                                                                                                                                        | 0.000165000  | -0.000219000 |             |              |   |              |             |              |   |              |              |              |   |              |             |             |   |              |              |              |   |              |             |              |   |              |              |              |   |              |             |              |   |              |              |              |   |              |              |              |   |              |              |              |   |              |             |              |   |              |              |              |   |              |              |              |   |              |             |              |   |              |              |              |   |             |              |             |   |             |              |              |   |             |              |             |
| C                                                                                                                                                           | -0.464472000                                                                                                                                                                                                                                                                                                                                                                                                                                                                                                                                                                                                                                                                                                                                                                                                                                                                                                                                                                                                                                                                                                                                                                                                                                                                                                                                                                                                                                                                                                                                                                                                                                       | 0.000248000  | 1.236228000  |             |              |   |              |             |              |   |              |              |              |   |              |             |             |   |              |              |              |   |              |             |              |   |              |              |              |   |              |             |              |   |              |              |              |   |              |              |              |   |              |              |              |   |              |             |              |   |              |              |              |   |              |              |              |   |              |             |              |   |              |              |              |   |             |              |             |   |             |              |              |   |             |              |             |
| C                                                                                                                                                           | -0.464715000                                                                                                                                                                                                                                                                                                                                                                                                                                                                                                                                                                                                                                                                                                                                                                                                                                                                                                                                                                                                                                                                                                                                                                                                                                                                                                                                                                                                                                                                                                                                                                                                                                       | 0.000137000  | -1.236518000 |             |              |   |              |             |              |   |              |              |              |   |              |             |             |   |              |              |              |   |              |             |              |   |              |              |              |   |              |             |              |   |              |              |              |   |              |              |              |   |              |              |              |   |              |             |              |   |              |              |              |   |              |              |              |   |              |             |              |   |              |              |              |   |             |              |             |   |             |              |              |   |             |              |             |
| H                                                                                                                                                           | 0.087052000                                                                                                                                                                                                                                                                                                                                                                                                                                                                                                                                                                                                                                                                                                                                                                                                                                                                                                                                                                                                                                                                                                                                                                                                                                                                                                                                                                                                                                                                                                                                                                                                                                        | 0.000276000  | 2.171658000  |             |              |   |              |             |              |   |              |              |              |   |              |             |             |   |              |              |              |   |              |             |              |   |              |              |              |   |              |             |              |   |              |              |              |   |              |              |              |   |              |              |              |   |              |             |              |   |              |              |              |   |              |              |              |   |              |             |              |   |              |              |              |   |             |              |             |   |             |              |              |   |             |              |             |
| H                                                                                                                                                           | 0.086624000                                                                                                                                                                                                                                                                                                                                                                                                                                                                                                                                                                                                                                                                                                                                                                                                                                                                                                                                                                                                                                                                                                                                                                                                                                                                                                                                                                                                                                                                                                                                                                                                                                        | 0.000069000  | -2.172058000 |             |              |   |              |             |              |   |              |              |              |   |              |             |             |   |              |              |              |   |              |             |              |   |              |              |              |   |              |             |              |   |              |              |              |   |              |              |              |   |              |              |              |   |              |             |              |   |              |              |              |   |              |              |              |   |              |             |              |   |              |              |              |   |             |              |             |   |             |              |              |   |             |              |             |
| C                                                                                                                                                           | -1.835449000                                                                                                                                                                                                                                                                                                                                                                                                                                                                                                                                                                                                                                                                                                                                                                                                                                                                                                                                                                                                                                                                                                                                                                                                                                                                                                                                                                                                                                                                                                                                                                                                                                       | 0.000302000  | 1.230754000  |             |              |   |              |             |              |   |              |              |              |   |              |             |             |   |              |              |              |   |              |             |              |   |              |              |              |   |              |             |              |   |              |              |              |   |              |              |              |   |              |              |              |   |              |             |              |   |              |              |              |   |              |              |              |   |              |             |              |   |              |              |              |   |             |              |             |   |             |              |              |   |             |              |             |
| C                                                                                                                                                           | -1.835689000                                                                                                                                                                                                                                                                                                                                                                                                                                                                                                                                                                                                                                                                                                                                                                                                                                                                                                                                                                                                                                                                                                                                                                                                                                                                                                                                                                                                                                                                                                                                                                                                                                       | 0.000193000  | -1.230772000 |             |              |   |              |             |              |   |              |              |              |   |              |             |             |   |              |              |              |   |              |             |              |   |              |              |              |   |              |             |              |   |              |              |              |   |              |              |              |   |              |              |              |   |              |             |              |   |              |              |              |   |              |              |              |   |              |             |              |   |              |              |              |   |             |              |             |   |             |              |              |   |             |              |             |
| H                                                                                                                                                           | -2.400318000                                                                                                                                                                                                                                                                                                                                                                                                                                                                                                                                                                                                                                                                                                                                                                                                                                                                                                                                                                                                                                                                                                                                                                                                                                                                                                                                                                                                                                                                                                                                                                                                                                       | 0.000368000  | 2.155724000  |             |              |   |              |             |              |   |              |              |              |   |              |             |             |   |              |              |              |   |              |             |              |   |              |              |              |   |              |             |              |   |              |              |              |   |              |              |              |   |              |              |              |   |              |             |              |   |              |              |              |   |              |              |              |   |              |             |              |   |              |              |              |   |             |              |             |   |             |              |              |   |             |              |             |
| H                                                                                                                                                           | -2.400740000                                                                                                                                                                                                                                                                                                                                                                                                                                                                                                                                                                                                                                                                                                                                                                                                                                                                                                                                                                                                                                                                                                                                                                                                                                                                                                                                                                                                                                                                                                                                                                                                                                       | 0.000171000  | -2.155632000 |             |              |   |              |             |              |   |              |              |              |   |              |             |             |   |              |              |              |   |              |             |              |   |              |              |              |   |              |             |              |   |              |              |              |   |              |              |              |   |              |              |              |   |              |             |              |   |              |              |              |   |              |              |              |   |              |             |              |   |              |              |              |   |             |              |             |   |             |              |              |   |             |              |             |
| C                                                                                                                                                           | -2.508117000                                                                                                                                                                                                                                                                                                                                                                                                                                                                                                                                                                                                                                                                                                                                                                                                                                                                                                                                                                                                                                                                                                                                                                                                                                                                                                                                                                                                                                                                                                                                                                                                                                       | 0.000273000  | 0.000057000  |             |              |   |              |             |              |   |              |              |              |   |              |             |             |   |              |              |              |   |              |             |              |   |              |              |              |   |              |             |              |   |              |              |              |   |              |              |              |   |              |              |              |   |              |             |              |   |              |              |              |   |              |              |              |   |              |             |              |   |              |              |              |   |             |              |             |   |             |              |              |   |             |              |             |
| H                                                                                                                                                           | -3.594978000                                                                                                                                                                                                                                                                                                                                                                                                                                                                                                                                                                                                                                                                                                                                                                                                                                                                                                                                                                                                                                                                                                                                                                                                                                                                                                                                                                                                                                                                                                                                                                                                                                       | 0.000315000  | 0.000163000  |             |              |   |              |             |              |   |              |              |              |   |              |             |             |   |              |              |              |   |              |             |              |   |              |              |              |   |              |             |              |   |              |              |              |   |              |              |              |   |              |              |              |   |              |             |              |   |              |              |              |   |              |              |              |   |              |             |              |   |              |              |              |   |             |              |             |   |             |              |              |   |             |              |             |
| H                                                                                                                                                           | 1.041781000                                                                                                                                                                                                                                                                                                                                                                                                                                                                                                                                                                                                                                                                                                                                                                                                                                                                                                                                                                                                                                                                                                                                                                                                                                                                                                                                                                                                                                                                                                                                                                                                                                        | 0.832740000  | -0.000313000 |             |              |   |              |             |              |   |              |              |              |   |              |             |             |   |              |              |              |   |              |             |              |   |              |              |              |   |              |             |              |   |              |              |              |   |              |              |              |   |              |              |              |   |              |             |              |   |              |              |              |   |              |              |              |   |              |             |              |   |              |              |              |   |             |              |             |   |             |              |              |   |             |              |             |
| H                                                                                                                                                           | 1.041792000                                                                                                                                                                                                                                                                                                                                                                                                                                                                                                                                                                                                                                                                                                                                                                                                                                                                                                                                                                                                                                                                                                                                                                                                                                                                                                                                                                                                                                                                                                                                                                                                                                        | -0.832392000 | -0.000268000 |             |              |   |              |             |              |   |              |              |              |   |              |             |             |   |              |              |              |   |              |             |              |   |              |              |              |   |              |             |              |   |              |              |              |   |              |              |              |   |              |              |              |   |              |             |              |   |              |              |              |   |              |              |              |   |              |             |              |   |              |              |              |   |             |              |             |   |             |              |              |   |             |              |             |
| O                                                                                                                                                           | 2.281576000                                                                                                                                                                                                                                                                                                                                                                                                                                                                                                                                                                                                                                                                                                                                                                                                                                                                                                                                                                                                                                                                                                                                                                                                                                                                                                                                                                                                                                                                                                                                                                                                                                        | 2.280400000  | -0.000059000 |             |              |   |              |             |              |   |              |              |              |   |              |             |             |   |              |              |              |   |              |             |              |   |              |              |              |   |              |             |              |   |              |              |              |   |              |              |              |   |              |              |              |   |              |             |              |   |              |              |              |   |              |              |              |   |              |             |              |   |              |              |              |   |             |              |             |   |             |              |              |   |             |              |             |
| H                                                                                                                                                           | 3.241385000                                                                                                                                                                                                                                                                                                                                                                                                                                                                                                                                                                                                                                                                                                                                                                                                                                                                                                                                                                                                                                                                                                                                                                                                                                                                                                                                                                                                                                                                                                                                                                                                                                        | 2.243669000  | 0.000881000  |             |              |   |              |             |              |   |              |              |              |   |              |             |             |   |              |              |              |   |              |             |              |   |              |              |              |   |              |             |              |   |              |              |              |   |              |              |              |   |              |              |              |   |              |             |              |   |              |              |              |   |              |              |              |   |              |             |              |   |              |              |              |   |             |              |             |   |             |              |              |   |             |              |             |
| H                                                                                                                                                           | 2.059768000                                                                                                                                                                                                                                                                                                                                                                                                                                                                                                                                                                                                                                                                                                                                                                                                                                                                                                                                                                                                                                                                                                                                                                                                                                                                                                                                                                                                                                                                                                                                                                                                                                        | 3.215115000  | -0.000749000 |             |              |   |              |             |              |   |              |              |              |   |              |             |             |   |              |              |              |   |              |             |              |   |              |              |              |   |              |             |              |   |              |              |              |   |              |              |              |   |              |              |              |   |              |             |              |   |              |              |              |   |              |              |              |   |              |             |              |   |              |              |              |   |             |              |             |   |             |              |              |   |             |              |             |
| H                                                                                                                                                           | 2.057464000                                                                                                                                                                                                                                                                                                                                                                                                                                                                                                                                                                                                                                                                                                                                                                                                                                                                                                                                                                                                                                                                                                                                                                                                                                                                                                                                                                                                                                                                                                                                                                                                                                        | -3.215768000 | 0.001339000  |             |              |   |              |             |              |   |              |              |              |   |              |             |             |   |              |              |              |   |              |             |              |   |              |              |              |   |              |             |              |   |              |              |              |   |              |              |              |   |              |              |              |   |              |             |              |   |              |              |              |   |              |              |              |   |              |             |              |   |              |              |              |   |             |              |             |   |             |              |              |   |             |              |             |
| H                                                                                                                                                           | 3.240041000                                                                                                                                                                                                                                                                                                                                                                                                                                                                                                                                                                                                                                                                                                                                                                                                                                                                                                                                                                                                                                                                                                                                                                                                                                                                                                                                                                                                                                                                                                                                                                                                                                        | -2.245493000 | -0.000536000 |             |              |   |              |             |              |   |              |              |              |   |              |             |             |   |              |              |              |   |              |             |              |   |              |              |              |   |              |             |              |   |              |              |              |   |              |              |              |   |              |              |              |   |              |             |              |   |              |              |              |   |              |              |              |   |              |             |              |   |              |              |              |   |             |              |             |   |             |              |              |   |             |              |             |
| O                                                                                                                                                           | 2.280196000                                                                                                                                                                                                                                                                                                                                                                                                                                                                                                                                                                                                                                                                                                                                                                                                                                                                                                                                                                                                                                                                                                                                                                                                                                                                                                                                                                                                                                                                                                                                                                                                                                        | -2.281273000 | 0.000386000  |             |              |   |              |             |              |   |              |              |              |   |              |             |             |   |              |              |              |   |              |             |              |   |              |              |              |   |              |             |              |   |              |              |              |   |              |              |              |   |              |              |              |   |              |             |              |   |              |              |              |   |              |              |              |   |              |             |              |   |              |              |              |   |             |              |             |   |             |              |              |   |             |              |             |
|                                                                                                                                                             | <table border="1"> <tbody> <tr><td>C</td><td>-0.517588000</td><td>0.000256000</td><td>0.000725000</td></tr> <tr><td>C</td><td>-1.255936000</td><td>0.014670000</td><td>-1.232992000</td></tr> </tbody> </table>                                                                                                                                                                                                                                                                                                                                                                                                                                                                                                                                                                                                                                                                                                                                                                                                                                                                                                                                                                                                                                                                                                                                                                                                                                                                                                                                                                                                                                    | C            | -0.517588000 | 0.000256000 | 0.000725000  | C | -1.255936000 | 0.014670000 | -1.232992000 |   |              |              |              |   |              |             |             |   |              |              |              |   |              |             |              |   |              |              |              |   |              |             |              |   |              |              |              |   |              |              |              |   |              |              |              |   |              |             |              |   |              |              |              |   |              |              |              |   |              |             |              |   |              |              |              |   |             |              |             |   |             |              |              |   |             |              |             |
| C                                                                                                                                                           | -0.517588000                                                                                                                                                                                                                                                                                                                                                                                                                                                                                                                                                                                                                                                                                                                                                                                                                                                                                                                                                                                                                                                                                                                                                                                                                                                                                                                                                                                                                                                                                                                                                                                                                                       | 0.000256000  | 0.000725000  |             |              |   |              |             |              |   |              |              |              |   |              |             |             |   |              |              |              |   |              |             |              |   |              |              |              |   |              |             |              |   |              |              |              |   |              |              |              |   |              |              |              |   |              |             |              |   |              |              |              |   |              |              |              |   |              |             |              |   |              |              |              |   |             |              |             |   |             |              |              |   |             |              |             |
| C                                                                                                                                                           | -1.255936000                                                                                                                                                                                                                                                                                                                                                                                                                                                                                                                                                                                                                                                                                                                                                                                                                                                                                                                                                                                                                                                                                                                                                                                                                                                                                                                                                                                                                                                                                                                                                                                                                                       | 0.014670000  | -1.232992000 |             |              |   |              |             |              |   |              |              |              |   |              |             |             |   |              |              |              |   |              |             |              |   |              |              |              |   |              |             |              |   |              |              |              |   |              |              |              |   |              |              |              |   |              |             |              |   |              |              |              |   |              |              |              |   |              |             |              |   |              |              |              |   |             |              |             |   |             |              |              |   |             |              |             |

|                                                                                                                                                            |                                                                                                                                                                                                                                                                                                                                                                                                                                                                                                                                                                                                                                                                                                                                                                                                                                                                                                                                                                                                                                                                                                                                                                                                                                                                                                                                                                                                                                                                                                                                                                                                                                                                                                                                                                                                                                                                                                                                                                                                                                                                                                                                                                                                                                                                                                                                                                                                                                                                                                                                                                                                                                                                                                                                                                                                                                                                                                                                                                                                                                                                                                |              |              |              |              |   |              |              |              |   |              |              |              |   |              |              |              |   |              |              |             |   |              |              |              |   |              |              |             |   |              |              |              |   |              |              |              |   |              |              |              |   |              |             |              |   |              |              |              |   |              |              |              |   |              |              |              |   |              |              |             |   |              |              |             |   |              |              |             |   |              |              |             |   |             |              |              |   |             |              |             |   |              |             |              |   |              |              |             |   |             |             |              |   |             |             |              |   |             |             |              |   |             |              |             |   |             |             |              |   |             |             |             |   |             |             |             |   |              |             |             |   |             |             |             |   |             |             |             |   |              |             |             |   |              |             |              |   |              |             |             |   |              |             |             |
|------------------------------------------------------------------------------------------------------------------------------------------------------------|------------------------------------------------------------------------------------------------------------------------------------------------------------------------------------------------------------------------------------------------------------------------------------------------------------------------------------------------------------------------------------------------------------------------------------------------------------------------------------------------------------------------------------------------------------------------------------------------------------------------------------------------------------------------------------------------------------------------------------------------------------------------------------------------------------------------------------------------------------------------------------------------------------------------------------------------------------------------------------------------------------------------------------------------------------------------------------------------------------------------------------------------------------------------------------------------------------------------------------------------------------------------------------------------------------------------------------------------------------------------------------------------------------------------------------------------------------------------------------------------------------------------------------------------------------------------------------------------------------------------------------------------------------------------------------------------------------------------------------------------------------------------------------------------------------------------------------------------------------------------------------------------------------------------------------------------------------------------------------------------------------------------------------------------------------------------------------------------------------------------------------------------------------------------------------------------------------------------------------------------------------------------------------------------------------------------------------------------------------------------------------------------------------------------------------------------------------------------------------------------------------------------------------------------------------------------------------------------------------------------------------------------------------------------------------------------------------------------------------------------------------------------------------------------------------------------------------------------------------------------------------------------------------------------------------------------------------------------------------------------------------------------------------------------------------------------------------------------|--------------|--------------|--------------|--------------|---|--------------|--------------|--------------|---|--------------|--------------|--------------|---|--------------|--------------|--------------|---|--------------|--------------|-------------|---|--------------|--------------|--------------|---|--------------|--------------|-------------|---|--------------|--------------|--------------|---|--------------|--------------|--------------|---|--------------|--------------|--------------|---|--------------|-------------|--------------|---|--------------|--------------|--------------|---|--------------|--------------|--------------|---|--------------|--------------|--------------|---|--------------|--------------|-------------|---|--------------|--------------|-------------|---|--------------|--------------|-------------|---|--------------|--------------|-------------|---|-------------|--------------|--------------|---|-------------|--------------|-------------|---|--------------|-------------|--------------|---|--------------|--------------|-------------|---|-------------|-------------|--------------|---|-------------|-------------|--------------|---|-------------|-------------|--------------|---|-------------|--------------|-------------|---|-------------|-------------|--------------|---|-------------|-------------|-------------|---|-------------|-------------|-------------|---|--------------|-------------|-------------|---|-------------|-------------|-------------|---|-------------|-------------|-------------|---|--------------|-------------|-------------|---|--------------|-------------|--------------|---|--------------|-------------|-------------|---|--------------|-------------|-------------|
| 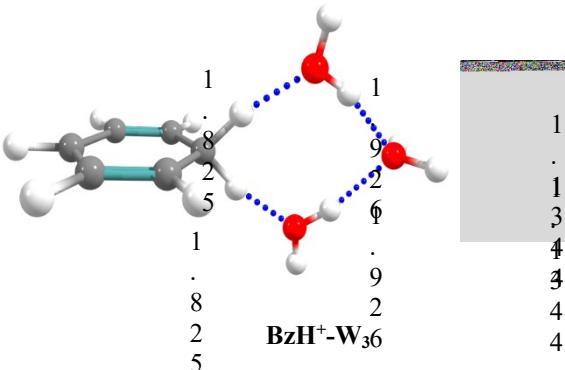 <p style="text-align: center;"><b>BzH<sup>+</sup>-W<sub>36</sub></b></p> | <table border="1"> <tbody> <tr><td>C</td><td>-1.257166000</td><td>-0.014326000</td><td>1.233702000</td></tr> <tr><td>H</td><td>-0.703203000</td><td>0.025829000</td><td>-2.167427000</td></tr> <tr><td>H</td><td>-0.705389000</td><td>-0.025319000</td><td>2.168703000</td></tr> <tr><td>C</td><td>-2.628672000</td><td>0.014437000</td><td>-1.229019000</td></tr> <tr><td>C</td><td>-2.629891000</td><td>-0.014474000</td><td>1.228344000</td></tr> <tr><td>H</td><td>-3.191670000</td><td>0.025279000</td><td>-2.155034000</td></tr> <tr><td>H</td><td>-3.193815000</td><td>-0.025459000</td><td>2.153793000</td></tr> <tr><td>C</td><td>-3.302918000</td><td>-0.000109000</td><td>-0.000678000</td></tr> <tr><td>H</td><td>-4.389540000</td><td>-0.000253000</td><td>-0.001220000</td></tr> <tr><td>H</td><td>0.289035000</td><td>-0.797316000</td><td>-0.008056000</td></tr> <tr><td>H</td><td>0.288932000</td><td>0.797878000</td><td>0.010198000</td></tr> <tr><td>O</td><td>1.840871000</td><td>-1.758448000</td><td>-0.016409000</td></tr> <tr><td>H</td><td>2.701242000</td><td>-1.312642000</td><td>-0.012882000</td></tr> <tr><td>H</td><td>2.008037000</td><td>-2.702950000</td><td>-0.028673000</td></tr> <tr><td>H</td><td>2.010054000</td><td>2.702651000</td><td>0.030025000</td></tr> <tr><td>H</td><td>2.700866000</td><td>1.311166000</td><td>0.013862000</td></tr> <tr><td>O</td><td>1.841259000</td><td>1.758469000</td><td>0.015788000</td></tr> <tr><td>H</td><td>4.694819000</td><td>-0.008699000</td><td>0.765885000</td></tr> <tr><td>H</td><td>4.693457000</td><td>0.008689000</td><td>-0.766473000</td></tr> <tr><td>O</td><td>4.111645000</td><td>-0.000218000</td><td>0.000223000</td></tr> </tbody> </table>                                                                                                                                                                                                                                                                                                                                                                                                                                                                                                                                                                                                                                                                                                                                                                                                                                                                                                                                                                                                                                                                                                                                                                                                                                                                                                                                                    | C            | -1.257166000 | -0.014326000 | 1.233702000  | H | -0.703203000 | 0.025829000  | -2.167427000 | H | -0.705389000 | -0.025319000 | 2.168703000  | C | -2.628672000 | 0.014437000  | -1.229019000 | C | -2.629891000 | -0.014474000 | 1.228344000 | H | -3.191670000 | 0.025279000  | -2.155034000 | H | -3.193815000 | -0.025459000 | 2.153793000 | C | -3.302918000 | -0.000109000 | -0.000678000 | H | -4.389540000 | -0.000253000 | -0.001220000 | H | 0.289035000  | -0.797316000 | -0.008056000 | H | 0.288932000  | 0.797878000 | 0.010198000  | O | 1.840871000  | -1.758448000 | -0.016409000 | H | 2.701242000  | -1.312642000 | -0.012882000 | H | 2.008037000  | -2.702950000 | -0.028673000 | H | 2.010054000  | 2.702651000  | 0.030025000 | H | 2.700866000  | 1.311166000  | 0.013862000 | O | 1.841259000  | 1.758469000  | 0.015788000 | H | 4.694819000  | -0.008699000 | 0.765885000 | H | 4.693457000 | 0.008689000  | -0.766473000 | O | 4.111645000 | -0.000218000 | 0.000223000 |   |              |             |              |   |              |              |             |   |             |             |              |   |             |             |              |   |             |             |              |   |             |              |             |   |             |             |              |   |             |             |             |   |             |             |             |   |              |             |             |   |             |             |             |   |             |             |             |   |              |             |             |   |              |             |              |   |              |             |             |   |              |             |             |
| C                                                                                                                                                          | -1.257166000                                                                                                                                                                                                                                                                                                                                                                                                                                                                                                                                                                                                                                                                                                                                                                                                                                                                                                                                                                                                                                                                                                                                                                                                                                                                                                                                                                                                                                                                                                                                                                                                                                                                                                                                                                                                                                                                                                                                                                                                                                                                                                                                                                                                                                                                                                                                                                                                                                                                                                                                                                                                                                                                                                                                                                                                                                                                                                                                                                                                                                                                                   | -0.014326000 | 1.233702000  |              |              |   |              |              |              |   |              |              |              |   |              |              |              |   |              |              |             |   |              |              |              |   |              |              |             |   |              |              |              |   |              |              |              |   |              |              |              |   |              |             |              |   |              |              |              |   |              |              |              |   |              |              |              |   |              |              |             |   |              |              |             |   |              |              |             |   |              |              |             |   |             |              |              |   |             |              |             |   |              |             |              |   |              |              |             |   |             |             |              |   |             |             |              |   |             |             |              |   |             |              |             |   |             |             |              |   |             |             |             |   |             |             |             |   |              |             |             |   |             |             |             |   |             |             |             |   |              |             |             |   |              |             |              |   |              |             |             |   |              |             |             |
| H                                                                                                                                                          | -0.703203000                                                                                                                                                                                                                                                                                                                                                                                                                                                                                                                                                                                                                                                                                                                                                                                                                                                                                                                                                                                                                                                                                                                                                                                                                                                                                                                                                                                                                                                                                                                                                                                                                                                                                                                                                                                                                                                                                                                                                                                                                                                                                                                                                                                                                                                                                                                                                                                                                                                                                                                                                                                                                                                                                                                                                                                                                                                                                                                                                                                                                                                                                   | 0.025829000  | -2.167427000 |              |              |   |              |              |              |   |              |              |              |   |              |              |              |   |              |              |             |   |              |              |              |   |              |              |             |   |              |              |              |   |              |              |              |   |              |              |              |   |              |             |              |   |              |              |              |   |              |              |              |   |              |              |              |   |              |              |             |   |              |              |             |   |              |              |             |   |              |              |             |   |             |              |              |   |             |              |             |   |              |             |              |   |              |              |             |   |             |             |              |   |             |             |              |   |             |             |              |   |             |              |             |   |             |             |              |   |             |             |             |   |             |             |             |   |              |             |             |   |             |             |             |   |             |             |             |   |              |             |             |   |              |             |              |   |              |             |             |   |              |             |             |
| H                                                                                                                                                          | -0.705389000                                                                                                                                                                                                                                                                                                                                                                                                                                                                                                                                                                                                                                                                                                                                                                                                                                                                                                                                                                                                                                                                                                                                                                                                                                                                                                                                                                                                                                                                                                                                                                                                                                                                                                                                                                                                                                                                                                                                                                                                                                                                                                                                                                                                                                                                                                                                                                                                                                                                                                                                                                                                                                                                                                                                                                                                                                                                                                                                                                                                                                                                                   | -0.025319000 | 2.168703000  |              |              |   |              |              |              |   |              |              |              |   |              |              |              |   |              |              |             |   |              |              |              |   |              |              |             |   |              |              |              |   |              |              |              |   |              |              |              |   |              |             |              |   |              |              |              |   |              |              |              |   |              |              |              |   |              |              |             |   |              |              |             |   |              |              |             |   |              |              |             |   |             |              |              |   |             |              |             |   |              |             |              |   |              |              |             |   |             |             |              |   |             |             |              |   |             |             |              |   |             |              |             |   |             |             |              |   |             |             |             |   |             |             |             |   |              |             |             |   |             |             |             |   |             |             |             |   |              |             |             |   |              |             |              |   |              |             |             |   |              |             |             |
| C                                                                                                                                                          | -2.628672000                                                                                                                                                                                                                                                                                                                                                                                                                                                                                                                                                                                                                                                                                                                                                                                                                                                                                                                                                                                                                                                                                                                                                                                                                                                                                                                                                                                                                                                                                                                                                                                                                                                                                                                                                                                                                                                                                                                                                                                                                                                                                                                                                                                                                                                                                                                                                                                                                                                                                                                                                                                                                                                                                                                                                                                                                                                                                                                                                                                                                                                                                   | 0.014437000  | -1.229019000 |              |              |   |              |              |              |   |              |              |              |   |              |              |              |   |              |              |             |   |              |              |              |   |              |              |             |   |              |              |              |   |              |              |              |   |              |              |              |   |              |             |              |   |              |              |              |   |              |              |              |   |              |              |              |   |              |              |             |   |              |              |             |   |              |              |             |   |              |              |             |   |             |              |              |   |             |              |             |   |              |             |              |   |              |              |             |   |             |             |              |   |             |             |              |   |             |             |              |   |             |              |             |   |             |             |              |   |             |             |             |   |             |             |             |   |              |             |             |   |             |             |             |   |             |             |             |   |              |             |             |   |              |             |              |   |              |             |             |   |              |             |             |
| C                                                                                                                                                          | -2.629891000                                                                                                                                                                                                                                                                                                                                                                                                                                                                                                                                                                                                                                                                                                                                                                                                                                                                                                                                                                                                                                                                                                                                                                                                                                                                                                                                                                                                                                                                                                                                                                                                                                                                                                                                                                                                                                                                                                                                                                                                                                                                                                                                                                                                                                                                                                                                                                                                                                                                                                                                                                                                                                                                                                                                                                                                                                                                                                                                                                                                                                                                                   | -0.014474000 | 1.228344000  |              |              |   |              |              |              |   |              |              |              |   |              |              |              |   |              |              |             |   |              |              |              |   |              |              |             |   |              |              |              |   |              |              |              |   |              |              |              |   |              |             |              |   |              |              |              |   |              |              |              |   |              |              |              |   |              |              |             |   |              |              |             |   |              |              |             |   |              |              |             |   |             |              |              |   |             |              |             |   |              |             |              |   |              |              |             |   |             |             |              |   |             |             |              |   |             |             |              |   |             |              |             |   |             |             |              |   |             |             |             |   |             |             |             |   |              |             |             |   |             |             |             |   |             |             |             |   |              |             |             |   |              |             |              |   |              |             |             |   |              |             |             |
| H                                                                                                                                                          | -3.191670000                                                                                                                                                                                                                                                                                                                                                                                                                                                                                                                                                                                                                                                                                                                                                                                                                                                                                                                                                                                                                                                                                                                                                                                                                                                                                                                                                                                                                                                                                                                                                                                                                                                                                                                                                                                                                                                                                                                                                                                                                                                                                                                                                                                                                                                                                                                                                                                                                                                                                                                                                                                                                                                                                                                                                                                                                                                                                                                                                                                                                                                                                   | 0.025279000  | -2.155034000 |              |              |   |              |              |              |   |              |              |              |   |              |              |              |   |              |              |             |   |              |              |              |   |              |              |             |   |              |              |              |   |              |              |              |   |              |              |              |   |              |             |              |   |              |              |              |   |              |              |              |   |              |              |              |   |              |              |             |   |              |              |             |   |              |              |             |   |              |              |             |   |             |              |              |   |             |              |             |   |              |             |              |   |              |              |             |   |             |             |              |   |             |             |              |   |             |             |              |   |             |              |             |   |             |             |              |   |             |             |             |   |             |             |             |   |              |             |             |   |             |             |             |   |             |             |             |   |              |             |             |   |              |             |              |   |              |             |             |   |              |             |             |
| H                                                                                                                                                          | -3.193815000                                                                                                                                                                                                                                                                                                                                                                                                                                                                                                                                                                                                                                                                                                                                                                                                                                                                                                                                                                                                                                                                                                                                                                                                                                                                                                                                                                                                                                                                                                                                                                                                                                                                                                                                                                                                                                                                                                                                                                                                                                                                                                                                                                                                                                                                                                                                                                                                                                                                                                                                                                                                                                                                                                                                                                                                                                                                                                                                                                                                                                                                                   | -0.025459000 | 2.153793000  |              |              |   |              |              |              |   |              |              |              |   |              |              |              |   |              |              |             |   |              |              |              |   |              |              |             |   |              |              |              |   |              |              |              |   |              |              |              |   |              |             |              |   |              |              |              |   |              |              |              |   |              |              |              |   |              |              |             |   |              |              |             |   |              |              |             |   |              |              |             |   |             |              |              |   |             |              |             |   |              |             |              |   |              |              |             |   |             |             |              |   |             |             |              |   |             |             |              |   |             |              |             |   |             |             |              |   |             |             |             |   |             |             |             |   |              |             |             |   |             |             |             |   |             |             |             |   |              |             |             |   |              |             |              |   |              |             |             |   |              |             |             |
| C                                                                                                                                                          | -3.302918000                                                                                                                                                                                                                                                                                                                                                                                                                                                                                                                                                                                                                                                                                                                                                                                                                                                                                                                                                                                                                                                                                                                                                                                                                                                                                                                                                                                                                                                                                                                                                                                                                                                                                                                                                                                                                                                                                                                                                                                                                                                                                                                                                                                                                                                                                                                                                                                                                                                                                                                                                                                                                                                                                                                                                                                                                                                                                                                                                                                                                                                                                   | -0.000109000 | -0.000678000 |              |              |   |              |              |              |   |              |              |              |   |              |              |              |   |              |              |             |   |              |              |              |   |              |              |             |   |              |              |              |   |              |              |              |   |              |              |              |   |              |             |              |   |              |              |              |   |              |              |              |   |              |              |              |   |              |              |             |   |              |              |             |   |              |              |             |   |              |              |             |   |             |              |              |   |             |              |             |   |              |             |              |   |              |              |             |   |             |             |              |   |             |             |              |   |             |             |              |   |             |              |             |   |             |             |              |   |             |             |             |   |             |             |             |   |              |             |             |   |             |             |             |   |             |             |             |   |              |             |             |   |              |             |              |   |              |             |             |   |              |             |             |
| H                                                                                                                                                          | -4.389540000                                                                                                                                                                                                                                                                                                                                                                                                                                                                                                                                                                                                                                                                                                                                                                                                                                                                                                                                                                                                                                                                                                                                                                                                                                                                                                                                                                                                                                                                                                                                                                                                                                                                                                                                                                                                                                                                                                                                                                                                                                                                                                                                                                                                                                                                                                                                                                                                                                                                                                                                                                                                                                                                                                                                                                                                                                                                                                                                                                                                                                                                                   | -0.000253000 | -0.001220000 |              |              |   |              |              |              |   |              |              |              |   |              |              |              |   |              |              |             |   |              |              |              |   |              |              |             |   |              |              |              |   |              |              |              |   |              |              |              |   |              |             |              |   |              |              |              |   |              |              |              |   |              |              |              |   |              |              |             |   |              |              |             |   |              |              |             |   |              |              |             |   |             |              |              |   |             |              |             |   |              |             |              |   |              |              |             |   |             |             |              |   |             |             |              |   |             |             |              |   |             |              |             |   |             |             |              |   |             |             |             |   |             |             |             |   |              |             |             |   |             |             |             |   |             |             |             |   |              |             |             |   |              |             |              |   |              |             |             |   |              |             |             |
| H                                                                                                                                                          | 0.289035000                                                                                                                                                                                                                                                                                                                                                                                                                                                                                                                                                                                                                                                                                                                                                                                                                                                                                                                                                                                                                                                                                                                                                                                                                                                                                                                                                                                                                                                                                                                                                                                                                                                                                                                                                                                                                                                                                                                                                                                                                                                                                                                                                                                                                                                                                                                                                                                                                                                                                                                                                                                                                                                                                                                                                                                                                                                                                                                                                                                                                                                                                    | -0.797316000 | -0.008056000 |              |              |   |              |              |              |   |              |              |              |   |              |              |              |   |              |              |             |   |              |              |              |   |              |              |             |   |              |              |              |   |              |              |              |   |              |              |              |   |              |             |              |   |              |              |              |   |              |              |              |   |              |              |              |   |              |              |             |   |              |              |             |   |              |              |             |   |              |              |             |   |             |              |              |   |             |              |             |   |              |             |              |   |              |              |             |   |             |             |              |   |             |             |              |   |             |             |              |   |             |              |             |   |             |             |              |   |             |             |             |   |             |             |             |   |              |             |             |   |             |             |             |   |             |             |             |   |              |             |             |   |              |             |              |   |              |             |             |   |              |             |             |
| H                                                                                                                                                          | 0.288932000                                                                                                                                                                                                                                                                                                                                                                                                                                                                                                                                                                                                                                                                                                                                                                                                                                                                                                                                                                                                                                                                                                                                                                                                                                                                                                                                                                                                                                                                                                                                                                                                                                                                                                                                                                                                                                                                                                                                                                                                                                                                                                                                                                                                                                                                                                                                                                                                                                                                                                                                                                                                                                                                                                                                                                                                                                                                                                                                                                                                                                                                                    | 0.797878000  | 0.010198000  |              |              |   |              |              |              |   |              |              |              |   |              |              |              |   |              |              |             |   |              |              |              |   |              |              |             |   |              |              |              |   |              |              |              |   |              |              |              |   |              |             |              |   |              |              |              |   |              |              |              |   |              |              |              |   |              |              |             |   |              |              |             |   |              |              |             |   |              |              |             |   |             |              |              |   |             |              |             |   |              |             |              |   |              |              |             |   |             |             |              |   |             |             |              |   |             |             |              |   |             |              |             |   |             |             |              |   |             |             |             |   |             |             |             |   |              |             |             |   |             |             |             |   |             |             |             |   |              |             |             |   |              |             |              |   |              |             |             |   |              |             |             |
| O                                                                                                                                                          | 1.840871000                                                                                                                                                                                                                                                                                                                                                                                                                                                                                                                                                                                                                                                                                                                                                                                                                                                                                                                                                                                                                                                                                                                                                                                                                                                                                                                                                                                                                                                                                                                                                                                                                                                                                                                                                                                                                                                                                                                                                                                                                                                                                                                                                                                                                                                                                                                                                                                                                                                                                                                                                                                                                                                                                                                                                                                                                                                                                                                                                                                                                                                                                    | -1.758448000 | -0.016409000 |              |              |   |              |              |              |   |              |              |              |   |              |              |              |   |              |              |             |   |              |              |              |   |              |              |             |   |              |              |              |   |              |              |              |   |              |              |              |   |              |             |              |   |              |              |              |   |              |              |              |   |              |              |              |   |              |              |             |   |              |              |             |   |              |              |             |   |              |              |             |   |             |              |              |   |             |              |             |   |              |             |              |   |              |              |             |   |             |             |              |   |             |             |              |   |             |             |              |   |             |              |             |   |             |             |              |   |             |             |             |   |             |             |             |   |              |             |             |   |             |             |             |   |             |             |             |   |              |             |             |   |              |             |              |   |              |             |             |   |              |             |             |
| H                                                                                                                                                          | 2.701242000                                                                                                                                                                                                                                                                                                                                                                                                                                                                                                                                                                                                                                                                                                                                                                                                                                                                                                                                                                                                                                                                                                                                                                                                                                                                                                                                                                                                                                                                                                                                                                                                                                                                                                                                                                                                                                                                                                                                                                                                                                                                                                                                                                                                                                                                                                                                                                                                                                                                                                                                                                                                                                                                                                                                                                                                                                                                                                                                                                                                                                                                                    | -1.312642000 | -0.012882000 |              |              |   |              |              |              |   |              |              |              |   |              |              |              |   |              |              |             |   |              |              |              |   |              |              |             |   |              |              |              |   |              |              |              |   |              |              |              |   |              |             |              |   |              |              |              |   |              |              |              |   |              |              |              |   |              |              |             |   |              |              |             |   |              |              |             |   |              |              |             |   |             |              |              |   |             |              |             |   |              |             |              |   |              |              |             |   |             |             |              |   |             |             |              |   |             |             |              |   |             |              |             |   |             |             |              |   |             |             |             |   |             |             |             |   |              |             |             |   |             |             |             |   |             |             |             |   |              |             |             |   |              |             |              |   |              |             |             |   |              |             |             |
| H                                                                                                                                                          | 2.008037000                                                                                                                                                                                                                                                                                                                                                                                                                                                                                                                                                                                                                                                                                                                                                                                                                                                                                                                                                                                                                                                                                                                                                                                                                                                                                                                                                                                                                                                                                                                                                                                                                                                                                                                                                                                                                                                                                                                                                                                                                                                                                                                                                                                                                                                                                                                                                                                                                                                                                                                                                                                                                                                                                                                                                                                                                                                                                                                                                                                                                                                                                    | -2.702950000 | -0.028673000 |              |              |   |              |              |              |   |              |              |              |   |              |              |              |   |              |              |             |   |              |              |              |   |              |              |             |   |              |              |              |   |              |              |              |   |              |              |              |   |              |             |              |   |              |              |              |   |              |              |              |   |              |              |              |   |              |              |             |   |              |              |             |   |              |              |             |   |              |              |             |   |             |              |              |   |             |              |             |   |              |             |              |   |              |              |             |   |             |             |              |   |             |             |              |   |             |             |              |   |             |              |             |   |             |             |              |   |             |             |             |   |             |             |             |   |              |             |             |   |             |             |             |   |             |             |             |   |              |             |             |   |              |             |              |   |              |             |             |   |              |             |             |
| H                                                                                                                                                          | 2.010054000                                                                                                                                                                                                                                                                                                                                                                                                                                                                                                                                                                                                                                                                                                                                                                                                                                                                                                                                                                                                                                                                                                                                                                                                                                                                                                                                                                                                                                                                                                                                                                                                                                                                                                                                                                                                                                                                                                                                                                                                                                                                                                                                                                                                                                                                                                                                                                                                                                                                                                                                                                                                                                                                                                                                                                                                                                                                                                                                                                                                                                                                                    | 2.702651000  | 0.030025000  |              |              |   |              |              |              |   |              |              |              |   |              |              |              |   |              |              |             |   |              |              |              |   |              |              |             |   |              |              |              |   |              |              |              |   |              |              |              |   |              |             |              |   |              |              |              |   |              |              |              |   |              |              |              |   |              |              |             |   |              |              |             |   |              |              |             |   |              |              |             |   |             |              |              |   |             |              |             |   |              |             |              |   |              |              |             |   |             |             |              |   |             |             |              |   |             |             |              |   |             |              |             |   |             |             |              |   |             |             |             |   |             |             |             |   |              |             |             |   |             |             |             |   |             |             |             |   |              |             |             |   |              |             |              |   |              |             |             |   |              |             |             |
| H                                                                                                                                                          | 2.700866000                                                                                                                                                                                                                                                                                                                                                                                                                                                                                                                                                                                                                                                                                                                                                                                                                                                                                                                                                                                                                                                                                                                                                                                                                                                                                                                                                                                                                                                                                                                                                                                                                                                                                                                                                                                                                                                                                                                                                                                                                                                                                                                                                                                                                                                                                                                                                                                                                                                                                                                                                                                                                                                                                                                                                                                                                                                                                                                                                                                                                                                                                    | 1.311166000  | 0.013862000  |              |              |   |              |              |              |   |              |              |              |   |              |              |              |   |              |              |             |   |              |              |              |   |              |              |             |   |              |              |              |   |              |              |              |   |              |              |              |   |              |             |              |   |              |              |              |   |              |              |              |   |              |              |              |   |              |              |             |   |              |              |             |   |              |              |             |   |              |              |             |   |             |              |              |   |             |              |             |   |              |             |              |   |              |              |             |   |             |             |              |   |             |             |              |   |             |             |              |   |             |              |             |   |             |             |              |   |             |             |             |   |             |             |             |   |              |             |             |   |             |             |             |   |             |             |             |   |              |             |             |   |              |             |              |   |              |             |             |   |              |             |             |
| O                                                                                                                                                          | 1.841259000                                                                                                                                                                                                                                                                                                                                                                                                                                                                                                                                                                                                                                                                                                                                                                                                                                                                                                                                                                                                                                                                                                                                                                                                                                                                                                                                                                                                                                                                                                                                                                                                                                                                                                                                                                                                                                                                                                                                                                                                                                                                                                                                                                                                                                                                                                                                                                                                                                                                                                                                                                                                                                                                                                                                                                                                                                                                                                                                                                                                                                                                                    | 1.758469000  | 0.015788000  |              |              |   |              |              |              |   |              |              |              |   |              |              |              |   |              |              |             |   |              |              |              |   |              |              |             |   |              |              |              |   |              |              |              |   |              |              |              |   |              |             |              |   |              |              |              |   |              |              |              |   |              |              |              |   |              |              |             |   |              |              |             |   |              |              |             |   |              |              |             |   |             |              |              |   |             |              |             |   |              |             |              |   |              |              |             |   |             |             |              |   |             |             |              |   |             |             |              |   |             |              |             |   |             |             |              |   |             |             |             |   |             |             |             |   |              |             |             |   |             |             |             |   |             |             |             |   |              |             |             |   |              |             |              |   |              |             |             |   |              |             |             |
| H                                                                                                                                                          | 4.694819000                                                                                                                                                                                                                                                                                                                                                                                                                                                                                                                                                                                                                                                                                                                                                                                                                                                                                                                                                                                                                                                                                                                                                                                                                                                                                                                                                                                                                                                                                                                                                                                                                                                                                                                                                                                                                                                                                                                                                                                                                                                                                                                                                                                                                                                                                                                                                                                                                                                                                                                                                                                                                                                                                                                                                                                                                                                                                                                                                                                                                                                                                    | -0.008699000 | 0.765885000  |              |              |   |              |              |              |   |              |              |              |   |              |              |              |   |              |              |             |   |              |              |              |   |              |              |             |   |              |              |              |   |              |              |              |   |              |              |              |   |              |             |              |   |              |              |              |   |              |              |              |   |              |              |              |   |              |              |             |   |              |              |             |   |              |              |             |   |              |              |             |   |             |              |              |   |             |              |             |   |              |             |              |   |              |              |             |   |             |             |              |   |             |             |              |   |             |             |              |   |             |              |             |   |             |             |              |   |             |             |             |   |             |             |             |   |              |             |             |   |             |             |             |   |             |             |             |   |              |             |             |   |              |             |              |   |              |             |             |   |              |             |             |
| H                                                                                                                                                          | 4.693457000                                                                                                                                                                                                                                                                                                                                                                                                                                                                                                                                                                                                                                                                                                                                                                                                                                                                                                                                                                                                                                                                                                                                                                                                                                                                                                                                                                                                                                                                                                                                                                                                                                                                                                                                                                                                                                                                                                                                                                                                                                                                                                                                                                                                                                                                                                                                                                                                                                                                                                                                                                                                                                                                                                                                                                                                                                                                                                                                                                                                                                                                                    | 0.008689000  | -0.766473000 |              |              |   |              |              |              |   |              |              |              |   |              |              |              |   |              |              |             |   |              |              |              |   |              |              |             |   |              |              |              |   |              |              |              |   |              |              |              |   |              |             |              |   |              |              |              |   |              |              |              |   |              |              |              |   |              |              |             |   |              |              |             |   |              |              |             |   |              |              |             |   |             |              |              |   |             |              |             |   |              |             |              |   |              |              |             |   |             |             |              |   |             |             |              |   |             |             |              |   |             |              |             |   |             |             |              |   |             |             |             |   |             |             |             |   |              |             |             |   |             |             |             |   |             |             |             |   |              |             |             |   |              |             |              |   |              |             |             |   |              |             |             |
| O                                                                                                                                                          | 4.111645000                                                                                                                                                                                                                                                                                                                                                                                                                                                                                                                                                                                                                                                                                                                                                                                                                                                                                                                                                                                                                                                                                                                                                                                                                                                                                                                                                                                                                                                                                                                                                                                                                                                                                                                                                                                                                                                                                                                                                                                                                                                                                                                                                                                                                                                                                                                                                                                                                                                                                                                                                                                                                                                                                                                                                                                                                                                                                                                                                                                                                                                                                    | -0.000218000 | 0.000223000  |              |              |   |              |              |              |   |              |              |              |   |              |              |              |   |              |              |             |   |              |              |              |   |              |              |             |   |              |              |              |   |              |              |              |   |              |              |              |   |              |             |              |   |              |              |              |   |              |              |              |   |              |              |              |   |              |              |             |   |              |              |             |   |              |              |             |   |              |              |             |   |             |              |              |   |             |              |             |   |              |             |              |   |              |              |             |   |             |             |              |   |             |             |              |   |             |             |              |   |             |              |             |   |             |             |              |   |             |             |             |   |             |             |             |   |              |             |             |   |             |             |             |   |             |             |             |   |              |             |             |   |              |             |              |   |              |             |             |   |              |             |             |
|  <p style="text-align: center;"><b>CorH<sup>+</sup></b></p>             | <table border="1"> <tbody> <tr><td>C</td><td>3.085850000</td><td>-2.145819000</td><td>-0.000529000</td></tr> <tr><td>C</td><td>2.758738000</td><td>-0.763425000</td><td>-0.000468000</td></tr> <tr><td>C</td><td>1.393470000</td><td>-0.382061000</td><td>-0.007154000</td></tr> <tr><td>C</td><td>0.379908000</td><td>-1.370991000</td><td>0.004906000</td></tr> <tr><td>C</td><td>0.732444000</td><td>-2.740057000</td><td>0.000134000</td></tr> <tr><td>C</td><td>2.110077000</td><td>-3.099316000</td><td>0.000642000</td></tr> <tr><td>C</td><td>1.042008000</td><td>0.986705000</td><td>0.004796000</td></tr> <tr><td>C</td><td>-0.988802000</td><td>-0.991940000</td><td>-0.006144000</td></tr> <tr><td>C</td><td>-1.336609000</td><td>0.389345000</td><td>0.003903000</td></tr> <tr><td>C</td><td>-0.327998000</td><td>1.371764000</td><td>-0.006873000</td></tr> <tr><td>C</td><td>-2.722831000</td><td>0.805184000</td><td>-0.001559000</td></tr> <tr><td>C</td><td>-3.702468000</td><td>-0.142890000</td><td>-0.000942000</td></tr> <tr><td>C</td><td>-3.423073000</td><td>-1.583615000</td><td>-0.001425000</td></tr> <tr><td>C</td><td>-1.989972000</td><td>-1.984582000</td><td>0.000731000</td></tr> <tr><td>C</td><td>-1.624566000</td><td>-3.330921000</td><td>0.002598000</td></tr> <tr><td>C</td><td>-0.293554000</td><td>-3.701257000</td><td>0.002450000</td></tr> <tr><td>H</td><td>-0.028812000</td><td>-4.754141000</td><td>0.002839000</td></tr> <tr><td>H</td><td>-2.395192000</td><td>-4.095480000</td><td>0.005202000</td></tr> <tr><td>H</td><td>4.131702000</td><td>-2.434824000</td><td>0.000527000</td></tr> <tr><td>H</td><td>2.374536000</td><td>-4.151914000</td><td>0.000614000</td></tr> <tr><td>H</td><td>-4.744821000</td><td>0.165683000</td><td>-0.002733000</td></tr> <tr><td>H</td><td>-3.945011000</td><td>-2.037747000</td><td>0.857392000</td></tr> <tr><td>C</td><td>3.754342000</td><td>0.245529000</td><td>-0.001093000</td></tr> <tr><td>C</td><td>3.414328000</td><td>1.569615000</td><td>-0.000503000</td></tr> <tr><td>C</td><td>2.053665000</td><td>1.973533000</td><td>-0.000987000</td></tr> <tr><td>H</td><td>4.798381000</td><td>-0.049826000</td><td>0.000010000</td></tr> <tr><td>H</td><td>4.186713000</td><td>2.332008000</td><td>-0.000968000</td></tr> <tr><td>C</td><td>1.672716000</td><td>3.332630000</td><td>0.001363000</td></tr> <tr><td>C</td><td>0.349110000</td><td>3.713005000</td><td>0.002183000</td></tr> <tr><td>C</td><td>-0.676469000</td><td>2.753681000</td><td>0.001686000</td></tr> <tr><td>H</td><td>2.448937000</td><td>4.092094000</td><td>0.001018000</td></tr> <tr><td>H</td><td>0.087181000</td><td>4.765661000</td><td>0.004919000</td></tr> <tr><td>C</td><td>-3.037541000</td><td>2.208419000</td><td>0.000350000</td></tr> <tr><td>H</td><td>-4.081957000</td><td>2.502262000</td><td>-0.000361000</td></tr> <tr><td>C</td><td>-2.055273000</td><td>3.138199000</td><td>0.000959000</td></tr> <tr><td>H</td><td>-2.296912000</td><td>4.195806000</td><td>0.003011000</td></tr> </tbody> </table> | C            | 3.085850000  | -2.145819000 | -0.000529000 | C | 2.758738000  | -0.763425000 | -0.000468000 | C | 1.393470000  | -0.382061000 | -0.007154000 | C | 0.379908000  | -1.370991000 | 0.004906000  | C | 0.732444000  | -2.740057000 | 0.000134000 | C | 2.110077000  | -3.099316000 | 0.000642000  | C | 1.042008000  | 0.986705000  | 0.004796000 | C | -0.988802000 | -0.991940000 | -0.006144000 | C | -1.336609000 | 0.389345000  | 0.003903000  | C | -0.327998000 | 1.371764000  | -0.006873000 | C | -2.722831000 | 0.805184000 | -0.001559000 | C | -3.702468000 | -0.142890000 | -0.000942000 | C | -3.423073000 | -1.583615000 | -0.001425000 | C | -1.989972000 | -1.984582000 | 0.000731000  | C | -1.624566000 | -3.330921000 | 0.002598000 | C | -0.293554000 | -3.701257000 | 0.002450000 | H | -0.028812000 | -4.754141000 | 0.002839000 | H | -2.395192000 | -4.095480000 | 0.005202000 | H | 4.131702000 | -2.434824000 | 0.000527000  | H | 2.374536000 | -4.151914000 | 0.000614000 | H | -4.744821000 | 0.165683000 | -0.002733000 | H | -3.945011000 | -2.037747000 | 0.857392000 | C | 3.754342000 | 0.245529000 | -0.001093000 | C | 3.414328000 | 1.569615000 | -0.000503000 | C | 2.053665000 | 1.973533000 | -0.000987000 | H | 4.798381000 | -0.049826000 | 0.000010000 | H | 4.186713000 | 2.332008000 | -0.000968000 | C | 1.672716000 | 3.332630000 | 0.001363000 | C | 0.349110000 | 3.713005000 | 0.002183000 | C | -0.676469000 | 2.753681000 | 0.001686000 | H | 2.448937000 | 4.092094000 | 0.001018000 | H | 0.087181000 | 4.765661000 | 0.004919000 | C | -3.037541000 | 2.208419000 | 0.000350000 | H | -4.081957000 | 2.502262000 | -0.000361000 | C | -2.055273000 | 3.138199000 | 0.000959000 | H | -2.296912000 | 4.195806000 | 0.003011000 |
| C                                                                                                                                                          | 3.085850000                                                                                                                                                                                                                                                                                                                                                                                                                                                                                                                                                                                                                                                                                                                                                                                                                                                                                                                                                                                                                                                                                                                                                                                                                                                                                                                                                                                                                                                                                                                                                                                                                                                                                                                                                                                                                                                                                                                                                                                                                                                                                                                                                                                                                                                                                                                                                                                                                                                                                                                                                                                                                                                                                                                                                                                                                                                                                                                                                                                                                                                                                    | -2.145819000 | -0.000529000 |              |              |   |              |              |              |   |              |              |              |   |              |              |              |   |              |              |             |   |              |              |              |   |              |              |             |   |              |              |              |   |              |              |              |   |              |              |              |   |              |             |              |   |              |              |              |   |              |              |              |   |              |              |              |   |              |              |             |   |              |              |             |   |              |              |             |   |              |              |             |   |             |              |              |   |             |              |             |   |              |             |              |   |              |              |             |   |             |             |              |   |             |             |              |   |             |             |              |   |             |              |             |   |             |             |              |   |             |             |             |   |             |             |             |   |              |             |             |   |             |             |             |   |             |             |             |   |              |             |             |   |              |             |              |   |              |             |             |   |              |             |             |
| C                                                                                                                                                          | 2.758738000                                                                                                                                                                                                                                                                                                                                                                                                                                                                                                                                                                                                                                                                                                                                                                                                                                                                                                                                                                                                                                                                                                                                                                                                                                                                                                                                                                                                                                                                                                                                                                                                                                                                                                                                                                                                                                                                                                                                                                                                                                                                                                                                                                                                                                                                                                                                                                                                                                                                                                                                                                                                                                                                                                                                                                                                                                                                                                                                                                                                                                                                                    | -0.763425000 | -0.000468000 |              |              |   |              |              |              |   |              |              |              |   |              |              |              |   |              |              |             |   |              |              |              |   |              |              |             |   |              |              |              |   |              |              |              |   |              |              |              |   |              |             |              |   |              |              |              |   |              |              |              |   |              |              |              |   |              |              |             |   |              |              |             |   |              |              |             |   |              |              |             |   |             |              |              |   |             |              |             |   |              |             |              |   |              |              |             |   |             |             |              |   |             |             |              |   |             |             |              |   |             |              |             |   |             |             |              |   |             |             |             |   |             |             |             |   |              |             |             |   |             |             |             |   |             |             |             |   |              |             |             |   |              |             |              |   |              |             |             |   |              |             |             |
| C                                                                                                                                                          | 1.393470000                                                                                                                                                                                                                                                                                                                                                                                                                                                                                                                                                                                                                                                                                                                                                                                                                                                                                                                                                                                                                                                                                                                                                                                                                                                                                                                                                                                                                                                                                                                                                                                                                                                                                                                                                                                                                                                                                                                                                                                                                                                                                                                                                                                                                                                                                                                                                                                                                                                                                                                                                                                                                                                                                                                                                                                                                                                                                                                                                                                                                                                                                    | -0.382061000 | -0.007154000 |              |              |   |              |              |              |   |              |              |              |   |              |              |              |   |              |              |             |   |              |              |              |   |              |              |             |   |              |              |              |   |              |              |              |   |              |              |              |   |              |             |              |   |              |              |              |   |              |              |              |   |              |              |              |   |              |              |             |   |              |              |             |   |              |              |             |   |              |              |             |   |             |              |              |   |             |              |             |   |              |             |              |   |              |              |             |   |             |             |              |   |             |             |              |   |             |             |              |   |             |              |             |   |             |             |              |   |             |             |             |   |             |             |             |   |              |             |             |   |             |             |             |   |             |             |             |   |              |             |             |   |              |             |              |   |              |             |             |   |              |             |             |
| C                                                                                                                                                          | 0.379908000                                                                                                                                                                                                                                                                                                                                                                                                                                                                                                                                                                                                                                                                                                                                                                                                                                                                                                                                                                                                                                                                                                                                                                                                                                                                                                                                                                                                                                                                                                                                                                                                                                                                                                                                                                                                                                                                                                                                                                                                                                                                                                                                                                                                                                                                                                                                                                                                                                                                                                                                                                                                                                                                                                                                                                                                                                                                                                                                                                                                                                                                                    | -1.370991000 | 0.004906000  |              |              |   |              |              |              |   |              |              |              |   |              |              |              |   |              |              |             |   |              |              |              |   |              |              |             |   |              |              |              |   |              |              |              |   |              |              |              |   |              |             |              |   |              |              |              |   |              |              |              |   |              |              |              |   |              |              |             |   |              |              |             |   |              |              |             |   |              |              |             |   |             |              |              |   |             |              |             |   |              |             |              |   |              |              |             |   |             |             |              |   |             |             |              |   |             |             |              |   |             |              |             |   |             |             |              |   |             |             |             |   |             |             |             |   |              |             |             |   |             |             |             |   |             |             |             |   |              |             |             |   |              |             |              |   |              |             |             |   |              |             |             |
| C                                                                                                                                                          | 0.732444000                                                                                                                                                                                                                                                                                                                                                                                                                                                                                                                                                                                                                                                                                                                                                                                                                                                                                                                                                                                                                                                                                                                                                                                                                                                                                                                                                                                                                                                                                                                                                                                                                                                                                                                                                                                                                                                                                                                                                                                                                                                                                                                                                                                                                                                                                                                                                                                                                                                                                                                                                                                                                                                                                                                                                                                                                                                                                                                                                                                                                                                                                    | -2.740057000 | 0.000134000  |              |              |   |              |              |              |   |              |              |              |   |              |              |              |   |              |              |             |   |              |              |              |   |              |              |             |   |              |              |              |   |              |              |              |   |              |              |              |   |              |             |              |   |              |              |              |   |              |              |              |   |              |              |              |   |              |              |             |   |              |              |             |   |              |              |             |   |              |              |             |   |             |              |              |   |             |              |             |   |              |             |              |   |              |              |             |   |             |             |              |   |             |             |              |   |             |             |              |   |             |              |             |   |             |             |              |   |             |             |             |   |             |             |             |   |              |             |             |   |             |             |             |   |             |             |             |   |              |             |             |   |              |             |              |   |              |             |             |   |              |             |             |
| C                                                                                                                                                          | 2.110077000                                                                                                                                                                                                                                                                                                                                                                                                                                                                                                                                                                                                                                                                                                                                                                                                                                                                                                                                                                                                                                                                                                                                                                                                                                                                                                                                                                                                                                                                                                                                                                                                                                                                                                                                                                                                                                                                                                                                                                                                                                                                                                                                                                                                                                                                                                                                                                                                                                                                                                                                                                                                                                                                                                                                                                                                                                                                                                                                                                                                                                                                                    | -3.099316000 | 0.000642000  |              |              |   |              |              |              |   |              |              |              |   |              |              |              |   |              |              |             |   |              |              |              |   |              |              |             |   |              |              |              |   |              |              |              |   |              |              |              |   |              |             |              |   |              |              |              |   |              |              |              |   |              |              |              |   |              |              |             |   |              |              |             |   |              |              |             |   |              |              |             |   |             |              |              |   |             |              |             |   |              |             |              |   |              |              |             |   |             |             |              |   |             |             |              |   |             |             |              |   |             |              |             |   |             |             |              |   |             |             |             |   |             |             |             |   |              |             |             |   |             |             |             |   |             |             |             |   |              |             |             |   |              |             |              |   |              |             |             |   |              |             |             |
| C                                                                                                                                                          | 1.042008000                                                                                                                                                                                                                                                                                                                                                                                                                                                                                                                                                                                                                                                                                                                                                                                                                                                                                                                                                                                                                                                                                                                                                                                                                                                                                                                                                                                                                                                                                                                                                                                                                                                                                                                                                                                                                                                                                                                                                                                                                                                                                                                                                                                                                                                                                                                                                                                                                                                                                                                                                                                                                                                                                                                                                                                                                                                                                                                                                                                                                                                                                    | 0.986705000  | 0.004796000  |              |              |   |              |              |              |   |              |              |              |   |              |              |              |   |              |              |             |   |              |              |              |   |              |              |             |   |              |              |              |   |              |              |              |   |              |              |              |   |              |             |              |   |              |              |              |   |              |              |              |   |              |              |              |   |              |              |             |   |              |              |             |   |              |              |             |   |              |              |             |   |             |              |              |   |             |              |             |   |              |             |              |   |              |              |             |   |             |             |              |   |             |             |              |   |             |             |              |   |             |              |             |   |             |             |              |   |             |             |             |   |             |             |             |   |              |             |             |   |             |             |             |   |             |             |             |   |              |             |             |   |              |             |              |   |              |             |             |   |              |             |             |
| C                                                                                                                                                          | -0.988802000                                                                                                                                                                                                                                                                                                                                                                                                                                                                                                                                                                                                                                                                                                                                                                                                                                                                                                                                                                                                                                                                                                                                                                                                                                                                                                                                                                                                                                                                                                                                                                                                                                                                                                                                                                                                                                                                                                                                                                                                                                                                                                                                                                                                                                                                                                                                                                                                                                                                                                                                                                                                                                                                                                                                                                                                                                                                                                                                                                                                                                                                                   | -0.991940000 | -0.006144000 |              |              |   |              |              |              |   |              |              |              |   |              |              |              |   |              |              |             |   |              |              |              |   |              |              |             |   |              |              |              |   |              |              |              |   |              |              |              |   |              |             |              |   |              |              |              |   |              |              |              |   |              |              |              |   |              |              |             |   |              |              |             |   |              |              |             |   |              |              |             |   |             |              |              |   |             |              |             |   |              |             |              |   |              |              |             |   |             |             |              |   |             |             |              |   |             |             |              |   |             |              |             |   |             |             |              |   |             |             |             |   |             |             |             |   |              |             |             |   |             |             |             |   |             |             |             |   |              |             |             |   |              |             |              |   |              |             |             |   |              |             |             |
| C                                                                                                                                                          | -1.336609000                                                                                                                                                                                                                                                                                                                                                                                                                                                                                                                                                                                                                                                                                                                                                                                                                                                                                                                                                                                                                                                                                                                                                                                                                                                                                                                                                                                                                                                                                                                                                                                                                                                                                                                                                                                                                                                                                                                                                                                                                                                                                                                                                                                                                                                                                                                                                                                                                                                                                                                                                                                                                                                                                                                                                                                                                                                                                                                                                                                                                                                                                   | 0.389345000  | 0.003903000  |              |              |   |              |              |              |   |              |              |              |   |              |              |              |   |              |              |             |   |              |              |              |   |              |              |             |   |              |              |              |   |              |              |              |   |              |              |              |   |              |             |              |   |              |              |              |   |              |              |              |   |              |              |              |   |              |              |             |   |              |              |             |   |              |              |             |   |              |              |             |   |             |              |              |   |             |              |             |   |              |             |              |   |              |              |             |   |             |             |              |   |             |             |              |   |             |             |              |   |             |              |             |   |             |             |              |   |             |             |             |   |             |             |             |   |              |             |             |   |             |             |             |   |             |             |             |   |              |             |             |   |              |             |              |   |              |             |             |   |              |             |             |
| C                                                                                                                                                          | -0.327998000                                                                                                                                                                                                                                                                                                                                                                                                                                                                                                                                                                                                                                                                                                                                                                                                                                                                                                                                                                                                                                                                                                                                                                                                                                                                                                                                                                                                                                                                                                                                                                                                                                                                                                                                                                                                                                                                                                                                                                                                                                                                                                                                                                                                                                                                                                                                                                                                                                                                                                                                                                                                                                                                                                                                                                                                                                                                                                                                                                                                                                                                                   | 1.371764000  | -0.006873000 |              |              |   |              |              |              |   |              |              |              |   |              |              |              |   |              |              |             |   |              |              |              |   |              |              |             |   |              |              |              |   |              |              |              |   |              |              |              |   |              |             |              |   |              |              |              |   |              |              |              |   |              |              |              |   |              |              |             |   |              |              |             |   |              |              |             |   |              |              |             |   |             |              |              |   |             |              |             |   |              |             |              |   |              |              |             |   |             |             |              |   |             |             |              |   |             |             |              |   |             |              |             |   |             |             |              |   |             |             |             |   |             |             |             |   |              |             |             |   |             |             |             |   |             |             |             |   |              |             |             |   |              |             |              |   |              |             |             |   |              |             |             |
| C                                                                                                                                                          | -2.722831000                                                                                                                                                                                                                                                                                                                                                                                                                                                                                                                                                                                                                                                                                                                                                                                                                                                                                                                                                                                                                                                                                                                                                                                                                                                                                                                                                                                                                                                                                                                                                                                                                                                                                                                                                                                                                                                                                                                                                                                                                                                                                                                                                                                                                                                                                                                                                                                                                                                                                                                                                                                                                                                                                                                                                                                                                                                                                                                                                                                                                                                                                   | 0.805184000  | -0.001559000 |              |              |   |              |              |              |   |              |              |              |   |              |              |              |   |              |              |             |   |              |              |              |   |              |              |             |   |              |              |              |   |              |              |              |   |              |              |              |   |              |             |              |   |              |              |              |   |              |              |              |   |              |              |              |   |              |              |             |   |              |              |             |   |              |              |             |   |              |              |             |   |             |              |              |   |             |              |             |   |              |             |              |   |              |              |             |   |             |             |              |   |             |             |              |   |             |             |              |   |             |              |             |   |             |             |              |   |             |             |             |   |             |             |             |   |              |             |             |   |             |             |             |   |             |             |             |   |              |             |             |   |              |             |              |   |              |             |             |   |              |             |             |
| C                                                                                                                                                          | -3.702468000                                                                                                                                                                                                                                                                                                                                                                                                                                                                                                                                                                                                                                                                                                                                                                                                                                                                                                                                                                                                                                                                                                                                                                                                                                                                                                                                                                                                                                                                                                                                                                                                                                                                                                                                                                                                                                                                                                                                                                                                                                                                                                                                                                                                                                                                                                                                                                                                                                                                                                                                                                                                                                                                                                                                                                                                                                                                                                                                                                                                                                                                                   | -0.142890000 | -0.000942000 |              |              |   |              |              |              |   |              |              |              |   |              |              |              |   |              |              |             |   |              |              |              |   |              |              |             |   |              |              |              |   |              |              |              |   |              |              |              |   |              |             |              |   |              |              |              |   |              |              |              |   |              |              |              |   |              |              |             |   |              |              |             |   |              |              |             |   |              |              |             |   |             |              |              |   |             |              |             |   |              |             |              |   |              |              |             |   |             |             |              |   |             |             |              |   |             |             |              |   |             |              |             |   |             |             |              |   |             |             |             |   |             |             |             |   |              |             |             |   |             |             |             |   |             |             |             |   |              |             |             |   |              |             |              |   |              |             |             |   |              |             |             |
| C                                                                                                                                                          | -3.423073000                                                                                                                                                                                                                                                                                                                                                                                                                                                                                                                                                                                                                                                                                                                                                                                                                                                                                                                                                                                                                                                                                                                                                                                                                                                                                                                                                                                                                                                                                                                                                                                                                                                                                                                                                                                                                                                                                                                                                                                                                                                                                                                                                                                                                                                                                                                                                                                                                                                                                                                                                                                                                                                                                                                                                                                                                                                                                                                                                                                                                                                                                   | -1.583615000 | -0.001425000 |              |              |   |              |              |              |   |              |              |              |   |              |              |              |   |              |              |             |   |              |              |              |   |              |              |             |   |              |              |              |   |              |              |              |   |              |              |              |   |              |             |              |   |              |              |              |   |              |              |              |   |              |              |              |   |              |              |             |   |              |              |             |   |              |              |             |   |              |              |             |   |             |              |              |   |             |              |             |   |              |             |              |   |              |              |             |   |             |             |              |   |             |             |              |   |             |             |              |   |             |              |             |   |             |             |              |   |             |             |             |   |             |             |             |   |              |             |             |   |             |             |             |   |             |             |             |   |              |             |             |   |              |             |              |   |              |             |             |   |              |             |             |
| C                                                                                                                                                          | -1.989972000                                                                                                                                                                                                                                                                                                                                                                                                                                                                                                                                                                                                                                                                                                                                                                                                                                                                                                                                                                                                                                                                                                                                                                                                                                                                                                                                                                                                                                                                                                                                                                                                                                                                                                                                                                                                                                                                                                                                                                                                                                                                                                                                                                                                                                                                                                                                                                                                                                                                                                                                                                                                                                                                                                                                                                                                                                                                                                                                                                                                                                                                                   | -1.984582000 | 0.000731000  |              |              |   |              |              |              |   |              |              |              |   |              |              |              |   |              |              |             |   |              |              |              |   |              |              |             |   |              |              |              |   |              |              |              |   |              |              |              |   |              |             |              |   |              |              |              |   |              |              |              |   |              |              |              |   |              |              |             |   |              |              |             |   |              |              |             |   |              |              |             |   |             |              |              |   |             |              |             |   |              |             |              |   |              |              |             |   |             |             |              |   |             |             |              |   |             |             |              |   |             |              |             |   |             |             |              |   |             |             |             |   |             |             |             |   |              |             |             |   |             |             |             |   |             |             |             |   |              |             |             |   |              |             |              |   |              |             |             |   |              |             |             |
| C                                                                                                                                                          | -1.624566000                                                                                                                                                                                                                                                                                                                                                                                                                                                                                                                                                                                                                                                                                                                                                                                                                                                                                                                                                                                                                                                                                                                                                                                                                                                                                                                                                                                                                                                                                                                                                                                                                                                                                                                                                                                                                                                                                                                                                                                                                                                                                                                                                                                                                                                                                                                                                                                                                                                                                                                                                                                                                                                                                                                                                                                                                                                                                                                                                                                                                                                                                   | -3.330921000 | 0.002598000  |              |              |   |              |              |              |   |              |              |              |   |              |              |              |   |              |              |             |   |              |              |              |   |              |              |             |   |              |              |              |   |              |              |              |   |              |              |              |   |              |             |              |   |              |              |              |   |              |              |              |   |              |              |              |   |              |              |             |   |              |              |             |   |              |              |             |   |              |              |             |   |             |              |              |   |             |              |             |   |              |             |              |   |              |              |             |   |             |             |              |   |             |             |              |   |             |             |              |   |             |              |             |   |             |             |              |   |             |             |             |   |             |             |             |   |              |             |             |   |             |             |             |   |             |             |             |   |              |             |             |   |              |             |              |   |              |             |             |   |              |             |             |
| C                                                                                                                                                          | -0.293554000                                                                                                                                                                                                                                                                                                                                                                                                                                                                                                                                                                                                                                                                                                                                                                                                                                                                                                                                                                                                                                                                                                                                                                                                                                                                                                                                                                                                                                                                                                                                                                                                                                                                                                                                                                                                                                                                                                                                                                                                                                                                                                                                                                                                                                                                                                                                                                                                                                                                                                                                                                                                                                                                                                                                                                                                                                                                                                                                                                                                                                                                                   | -3.701257000 | 0.002450000  |              |              |   |              |              |              |   |              |              |              |   |              |              |              |   |              |              |             |   |              |              |              |   |              |              |             |   |              |              |              |   |              |              |              |   |              |              |              |   |              |             |              |   |              |              |              |   |              |              |              |   |              |              |              |   |              |              |             |   |              |              |             |   |              |              |             |   |              |              |             |   |             |              |              |   |             |              |             |   |              |             |              |   |              |              |             |   |             |             |              |   |             |             |              |   |             |             |              |   |             |              |             |   |             |             |              |   |             |             |             |   |             |             |             |   |              |             |             |   |             |             |             |   |             |             |             |   |              |             |             |   |              |             |              |   |              |             |             |   |              |             |             |
| H                                                                                                                                                          | -0.028812000                                                                                                                                                                                                                                                                                                                                                                                                                                                                                                                                                                                                                                                                                                                                                                                                                                                                                                                                                                                                                                                                                                                                                                                                                                                                                                                                                                                                                                                                                                                                                                                                                                                                                                                                                                                                                                                                                                                                                                                                                                                                                                                                                                                                                                                                                                                                                                                                                                                                                                                                                                                                                                                                                                                                                                                                                                                                                                                                                                                                                                                                                   | -4.754141000 | 0.002839000  |              |              |   |              |              |              |   |              |              |              |   |              |              |              |   |              |              |             |   |              |              |              |   |              |              |             |   |              |              |              |   |              |              |              |   |              |              |              |   |              |             |              |   |              |              |              |   |              |              |              |   |              |              |              |   |              |              |             |   |              |              |             |   |              |              |             |   |              |              |             |   |             |              |              |   |             |              |             |   |              |             |              |   |              |              |             |   |             |             |              |   |             |             |              |   |             |             |              |   |             |              |             |   |             |             |              |   |             |             |             |   |             |             |             |   |              |             |             |   |             |             |             |   |             |             |             |   |              |             |             |   |              |             |              |   |              |             |             |   |              |             |             |
| H                                                                                                                                                          | -2.395192000                                                                                                                                                                                                                                                                                                                                                                                                                                                                                                                                                                                                                                                                                                                                                                                                                                                                                                                                                                                                                                                                                                                                                                                                                                                                                                                                                                                                                                                                                                                                                                                                                                                                                                                                                                                                                                                                                                                                                                                                                                                                                                                                                                                                                                                                                                                                                                                                                                                                                                                                                                                                                                                                                                                                                                                                                                                                                                                                                                                                                                                                                   | -4.095480000 | 0.005202000  |              |              |   |              |              |              |   |              |              |              |   |              |              |              |   |              |              |             |   |              |              |              |   |              |              |             |   |              |              |              |   |              |              |              |   |              |              |              |   |              |             |              |   |              |              |              |   |              |              |              |   |              |              |              |   |              |              |             |   |              |              |             |   |              |              |             |   |              |              |             |   |             |              |              |   |             |              |             |   |              |             |              |   |              |              |             |   |             |             |              |   |             |             |              |   |             |             |              |   |             |              |             |   |             |             |              |   |             |             |             |   |             |             |             |   |              |             |             |   |             |             |             |   |             |             |             |   |              |             |             |   |              |             |              |   |              |             |             |   |              |             |             |
| H                                                                                                                                                          | 4.131702000                                                                                                                                                                                                                                                                                                                                                                                                                                                                                                                                                                                                                                                                                                                                                                                                                                                                                                                                                                                                                                                                                                                                                                                                                                                                                                                                                                                                                                                                                                                                                                                                                                                                                                                                                                                                                                                                                                                                                                                                                                                                                                                                                                                                                                                                                                                                                                                                                                                                                                                                                                                                                                                                                                                                                                                                                                                                                                                                                                                                                                                                                    | -2.434824000 | 0.000527000  |              |              |   |              |              |              |   |              |              |              |   |              |              |              |   |              |              |             |   |              |              |              |   |              |              |             |   |              |              |              |   |              |              |              |   |              |              |              |   |              |             |              |   |              |              |              |   |              |              |              |   |              |              |              |   |              |              |             |   |              |              |             |   |              |              |             |   |              |              |             |   |             |              |              |   |             |              |             |   |              |             |              |   |              |              |             |   |             |             |              |   |             |             |              |   |             |             |              |   |             |              |             |   |             |             |              |   |             |             |             |   |             |             |             |   |              |             |             |   |             |             |             |   |             |             |             |   |              |             |             |   |              |             |              |   |              |             |             |   |              |             |             |
| H                                                                                                                                                          | 2.374536000                                                                                                                                                                                                                                                                                                                                                                                                                                                                                                                                                                                                                                                                                                                                                                                                                                                                                                                                                                                                                                                                                                                                                                                                                                                                                                                                                                                                                                                                                                                                                                                                                                                                                                                                                                                                                                                                                                                                                                                                                                                                                                                                                                                                                                                                                                                                                                                                                                                                                                                                                                                                                                                                                                                                                                                                                                                                                                                                                                                                                                                                                    | -4.151914000 | 0.000614000  |              |              |   |              |              |              |   |              |              |              |   |              |              |              |   |              |              |             |   |              |              |              |   |              |              |             |   |              |              |              |   |              |              |              |   |              |              |              |   |              |             |              |   |              |              |              |   |              |              |              |   |              |              |              |   |              |              |             |   |              |              |             |   |              |              |             |   |              |              |             |   |             |              |              |   |             |              |             |   |              |             |              |   |              |              |             |   |             |             |              |   |             |             |              |   |             |             |              |   |             |              |             |   |             |             |              |   |             |             |             |   |             |             |             |   |              |             |             |   |             |             |             |   |             |             |             |   |              |             |             |   |              |             |              |   |              |             |             |   |              |             |             |
| H                                                                                                                                                          | -4.744821000                                                                                                                                                                                                                                                                                                                                                                                                                                                                                                                                                                                                                                                                                                                                                                                                                                                                                                                                                                                                                                                                                                                                                                                                                                                                                                                                                                                                                                                                                                                                                                                                                                                                                                                                                                                                                                                                                                                                                                                                                                                                                                                                                                                                                                                                                                                                                                                                                                                                                                                                                                                                                                                                                                                                                                                                                                                                                                                                                                                                                                                                                   | 0.165683000  | -0.002733000 |              |              |   |              |              |              |   |              |              |              |   |              |              |              |   |              |              |             |   |              |              |              |   |              |              |             |   |              |              |              |   |              |              |              |   |              |              |              |   |              |             |              |   |              |              |              |   |              |              |              |   |              |              |              |   |              |              |             |   |              |              |             |   |              |              |             |   |              |              |             |   |             |              |              |   |             |              |             |   |              |             |              |   |              |              |             |   |             |             |              |   |             |             |              |   |             |             |              |   |             |              |             |   |             |             |              |   |             |             |             |   |             |             |             |   |              |             |             |   |             |             |             |   |             |             |             |   |              |             |             |   |              |             |              |   |              |             |             |   |              |             |             |
| H                                                                                                                                                          | -3.945011000                                                                                                                                                                                                                                                                                                                                                                                                                                                                                                                                                                                                                                                                                                                                                                                                                                                                                                                                                                                                                                                                                                                                                                                                                                                                                                                                                                                                                                                                                                                                                                                                                                                                                                                                                                                                                                                                                                                                                                                                                                                                                                                                                                                                                                                                                                                                                                                                                                                                                                                                                                                                                                                                                                                                                                                                                                                                                                                                                                                                                                                                                   | -2.037747000 | 0.857392000  |              |              |   |              |              |              |   |              |              |              |   |              |              |              |   |              |              |             |   |              |              |              |   |              |              |             |   |              |              |              |   |              |              |              |   |              |              |              |   |              |             |              |   |              |              |              |   |              |              |              |   |              |              |              |   |              |              |             |   |              |              |             |   |              |              |             |   |              |              |             |   |             |              |              |   |             |              |             |   |              |             |              |   |              |              |             |   |             |             |              |   |             |             |              |   |             |             |              |   |             |              |             |   |             |             |              |   |             |             |             |   |             |             |             |   |              |             |             |   |             |             |             |   |             |             |             |   |              |             |             |   |              |             |              |   |              |             |             |   |              |             |             |
| C                                                                                                                                                          | 3.754342000                                                                                                                                                                                                                                                                                                                                                                                                                                                                                                                                                                                                                                                                                                                                                                                                                                                                                                                                                                                                                                                                                                                                                                                                                                                                                                                                                                                                                                                                                                                                                                                                                                                                                                                                                                                                                                                                                                                                                                                                                                                                                                                                                                                                                                                                                                                                                                                                                                                                                                                                                                                                                                                                                                                                                                                                                                                                                                                                                                                                                                                                                    | 0.245529000  | -0.001093000 |              |              |   |              |              |              |   |              |              |              |   |              |              |              |   |              |              |             |   |              |              |              |   |              |              |             |   |              |              |              |   |              |              |              |   |              |              |              |   |              |             |              |   |              |              |              |   |              |              |              |   |              |              |              |   |              |              |             |   |              |              |             |   |              |              |             |   |              |              |             |   |             |              |              |   |             |              |             |   |              |             |              |   |              |              |             |   |             |             |              |   |             |             |              |   |             |             |              |   |             |              |             |   |             |             |              |   |             |             |             |   |             |             |             |   |              |             |             |   |             |             |             |   |             |             |             |   |              |             |             |   |              |             |              |   |              |             |             |   |              |             |             |
| C                                                                                                                                                          | 3.414328000                                                                                                                                                                                                                                                                                                                                                                                                                                                                                                                                                                                                                                                                                                                                                                                                                                                                                                                                                                                                                                                                                                                                                                                                                                                                                                                                                                                                                                                                                                                                                                                                                                                                                                                                                                                                                                                                                                                                                                                                                                                                                                                                                                                                                                                                                                                                                                                                                                                                                                                                                                                                                                                                                                                                                                                                                                                                                                                                                                                                                                                                                    | 1.569615000  | -0.000503000 |              |              |   |              |              |              |   |              |              |              |   |              |              |              |   |              |              |             |   |              |              |              |   |              |              |             |   |              |              |              |   |              |              |              |   |              |              |              |   |              |             |              |   |              |              |              |   |              |              |              |   |              |              |              |   |              |              |             |   |              |              |             |   |              |              |             |   |              |              |             |   |             |              |              |   |             |              |             |   |              |             |              |   |              |              |             |   |             |             |              |   |             |             |              |   |             |             |              |   |             |              |             |   |             |             |              |   |             |             |             |   |             |             |             |   |              |             |             |   |             |             |             |   |             |             |             |   |              |             |             |   |              |             |              |   |              |             |             |   |              |             |             |
| C                                                                                                                                                          | 2.053665000                                                                                                                                                                                                                                                                                                                                                                                                                                                                                                                                                                                                                                                                                                                                                                                                                                                                                                                                                                                                                                                                                                                                                                                                                                                                                                                                                                                                                                                                                                                                                                                                                                                                                                                                                                                                                                                                                                                                                                                                                                                                                                                                                                                                                                                                                                                                                                                                                                                                                                                                                                                                                                                                                                                                                                                                                                                                                                                                                                                                                                                                                    | 1.973533000  | -0.000987000 |              |              |   |              |              |              |   |              |              |              |   |              |              |              |   |              |              |             |   |              |              |              |   |              |              |             |   |              |              |              |   |              |              |              |   |              |              |              |   |              |             |              |   |              |              |              |   |              |              |              |   |              |              |              |   |              |              |             |   |              |              |             |   |              |              |             |   |              |              |             |   |             |              |              |   |             |              |             |   |              |             |              |   |              |              |             |   |             |             |              |   |             |             |              |   |             |             |              |   |             |              |             |   |             |             |              |   |             |             |             |   |             |             |             |   |              |             |             |   |             |             |             |   |             |             |             |   |              |             |             |   |              |             |              |   |              |             |             |   |              |             |             |
| H                                                                                                                                                          | 4.798381000                                                                                                                                                                                                                                                                                                                                                                                                                                                                                                                                                                                                                                                                                                                                                                                                                                                                                                                                                                                                                                                                                                                                                                                                                                                                                                                                                                                                                                                                                                                                                                                                                                                                                                                                                                                                                                                                                                                                                                                                                                                                                                                                                                                                                                                                                                                                                                                                                                                                                                                                                                                                                                                                                                                                                                                                                                                                                                                                                                                                                                                                                    | -0.049826000 | 0.000010000  |              |              |   |              |              |              |   |              |              |              |   |              |              |              |   |              |              |             |   |              |              |              |   |              |              |             |   |              |              |              |   |              |              |              |   |              |              |              |   |              |             |              |   |              |              |              |   |              |              |              |   |              |              |              |   |              |              |             |   |              |              |             |   |              |              |             |   |              |              |             |   |             |              |              |   |             |              |             |   |              |             |              |   |              |              |             |   |             |             |              |   |             |             |              |   |             |             |              |   |             |              |             |   |             |             |              |   |             |             |             |   |             |             |             |   |              |             |             |   |             |             |             |   |             |             |             |   |              |             |             |   |              |             |              |   |              |             |             |   |              |             |             |
| H                                                                                                                                                          | 4.186713000                                                                                                                                                                                                                                                                                                                                                                                                                                                                                                                                                                                                                                                                                                                                                                                                                                                                                                                                                                                                                                                                                                                                                                                                                                                                                                                                                                                                                                                                                                                                                                                                                                                                                                                                                                                                                                                                                                                                                                                                                                                                                                                                                                                                                                                                                                                                                                                                                                                                                                                                                                                                                                                                                                                                                                                                                                                                                                                                                                                                                                                                                    | 2.332008000  | -0.000968000 |              |              |   |              |              |              |   |              |              |              |   |              |              |              |   |              |              |             |   |              |              |              |   |              |              |             |   |              |              |              |   |              |              |              |   |              |              |              |   |              |             |              |   |              |              |              |   |              |              |              |   |              |              |              |   |              |              |             |   |              |              |             |   |              |              |             |   |              |              |             |   |             |              |              |   |             |              |             |   |              |             |              |   |              |              |             |   |             |             |              |   |             |             |              |   |             |             |              |   |             |              |             |   |             |             |              |   |             |             |             |   |             |             |             |   |              |             |             |   |             |             |             |   |             |             |             |   |              |             |             |   |              |             |              |   |              |             |             |   |              |             |             |
| C                                                                                                                                                          | 1.672716000                                                                                                                                                                                                                                                                                                                                                                                                                                                                                                                                                                                                                                                                                                                                                                                                                                                                                                                                                                                                                                                                                                                                                                                                                                                                                                                                                                                                                                                                                                                                                                                                                                                                                                                                                                                                                                                                                                                                                                                                                                                                                                                                                                                                                                                                                                                                                                                                                                                                                                                                                                                                                                                                                                                                                                                                                                                                                                                                                                                                                                                                                    | 3.332630000  | 0.001363000  |              |              |   |              |              |              |   |              |              |              |   |              |              |              |   |              |              |             |   |              |              |              |   |              |              |             |   |              |              |              |   |              |              |              |   |              |              |              |   |              |             |              |   |              |              |              |   |              |              |              |   |              |              |              |   |              |              |             |   |              |              |             |   |              |              |             |   |              |              |             |   |             |              |              |   |             |              |             |   |              |             |              |   |              |              |             |   |             |             |              |   |             |             |              |   |             |             |              |   |             |              |             |   |             |             |              |   |             |             |             |   |             |             |             |   |              |             |             |   |             |             |             |   |             |             |             |   |              |             |             |   |              |             |              |   |              |             |             |   |              |             |             |
| C                                                                                                                                                          | 0.349110000                                                                                                                                                                                                                                                                                                                                                                                                                                                                                                                                                                                                                                                                                                                                                                                                                                                                                                                                                                                                                                                                                                                                                                                                                                                                                                                                                                                                                                                                                                                                                                                                                                                                                                                                                                                                                                                                                                                                                                                                                                                                                                                                                                                                                                                                                                                                                                                                                                                                                                                                                                                                                                                                                                                                                                                                                                                                                                                                                                                                                                                                                    | 3.713005000  | 0.002183000  |              |              |   |              |              |              |   |              |              |              |   |              |              |              |   |              |              |             |   |              |              |              |   |              |              |             |   |              |              |              |   |              |              |              |   |              |              |              |   |              |             |              |   |              |              |              |   |              |              |              |   |              |              |              |   |              |              |             |   |              |              |             |   |              |              |             |   |              |              |             |   |             |              |              |   |             |              |             |   |              |             |              |   |              |              |             |   |             |             |              |   |             |             |              |   |             |             |              |   |             |              |             |   |             |             |              |   |             |             |             |   |             |             |             |   |              |             |             |   |             |             |             |   |             |             |             |   |              |             |             |   |              |             |              |   |              |             |             |   |              |             |             |
| C                                                                                                                                                          | -0.676469000                                                                                                                                                                                                                                                                                                                                                                                                                                                                                                                                                                                                                                                                                                                                                                                                                                                                                                                                                                                                                                                                                                                                                                                                                                                                                                                                                                                                                                                                                                                                                                                                                                                                                                                                                                                                                                                                                                                                                                                                                                                                                                                                                                                                                                                                                                                                                                                                                                                                                                                                                                                                                                                                                                                                                                                                                                                                                                                                                                                                                                                                                   | 2.753681000  | 0.001686000  |              |              |   |              |              |              |   |              |              |              |   |              |              |              |   |              |              |             |   |              |              |              |   |              |              |             |   |              |              |              |   |              |              |              |   |              |              |              |   |              |             |              |   |              |              |              |   |              |              |              |   |              |              |              |   |              |              |             |   |              |              |             |   |              |              |             |   |              |              |             |   |             |              |              |   |             |              |             |   |              |             |              |   |              |              |             |   |             |             |              |   |             |             |              |   |             |             |              |   |             |              |             |   |             |             |              |   |             |             |             |   |             |             |             |   |              |             |             |   |             |             |             |   |             |             |             |   |              |             |             |   |              |             |              |   |              |             |             |   |              |             |             |
| H                                                                                                                                                          | 2.448937000                                                                                                                                                                                                                                                                                                                                                                                                                                                                                                                                                                                                                                                                                                                                                                                                                                                                                                                                                                                                                                                                                                                                                                                                                                                                                                                                                                                                                                                                                                                                                                                                                                                                                                                                                                                                                                                                                                                                                                                                                                                                                                                                                                                                                                                                                                                                                                                                                                                                                                                                                                                                                                                                                                                                                                                                                                                                                                                                                                                                                                                                                    | 4.092094000  | 0.001018000  |              |              |   |              |              |              |   |              |              |              |   |              |              |              |   |              |              |             |   |              |              |              |   |              |              |             |   |              |              |              |   |              |              |              |   |              |              |              |   |              |             |              |   |              |              |              |   |              |              |              |   |              |              |              |   |              |              |             |   |              |              |             |   |              |              |             |   |              |              |             |   |             |              |              |   |             |              |             |   |              |             |              |   |              |              |             |   |             |             |              |   |             |             |              |   |             |             |              |   |             |              |             |   |             |             |              |   |             |             |             |   |             |             |             |   |              |             |             |   |             |             |             |   |             |             |             |   |              |             |             |   |              |             |              |   |              |             |             |   |              |             |             |
| H                                                                                                                                                          | 0.087181000                                                                                                                                                                                                                                                                                                                                                                                                                                                                                                                                                                                                                                                                                                                                                                                                                                                                                                                                                                                                                                                                                                                                                                                                                                                                                                                                                                                                                                                                                                                                                                                                                                                                                                                                                                                                                                                                                                                                                                                                                                                                                                                                                                                                                                                                                                                                                                                                                                                                                                                                                                                                                                                                                                                                                                                                                                                                                                                                                                                                                                                                                    | 4.765661000  | 0.004919000  |              |              |   |              |              |              |   |              |              |              |   |              |              |              |   |              |              |             |   |              |              |              |   |              |              |             |   |              |              |              |   |              |              |              |   |              |              |              |   |              |             |              |   |              |              |              |   |              |              |              |   |              |              |              |   |              |              |             |   |              |              |             |   |              |              |             |   |              |              |             |   |             |              |              |   |             |              |             |   |              |             |              |   |              |              |             |   |             |             |              |   |             |             |              |   |             |             |              |   |             |              |             |   |             |             |              |   |             |             |             |   |             |             |             |   |              |             |             |   |             |             |             |   |             |             |             |   |              |             |             |   |              |             |              |   |              |             |             |   |              |             |             |
| C                                                                                                                                                          | -3.037541000                                                                                                                                                                                                                                                                                                                                                                                                                                                                                                                                                                                                                                                                                                                                                                                                                                                                                                                                                                                                                                                                                                                                                                                                                                                                                                                                                                                                                                                                                                                                                                                                                                                                                                                                                                                                                                                                                                                                                                                                                                                                                                                                                                                                                                                                                                                                                                                                                                                                                                                                                                                                                                                                                                                                                                                                                                                                                                                                                                                                                                                                                   | 2.208419000  | 0.000350000  |              |              |   |              |              |              |   |              |              |              |   |              |              |              |   |              |              |             |   |              |              |              |   |              |              |             |   |              |              |              |   |              |              |              |   |              |              |              |   |              |             |              |   |              |              |              |   |              |              |              |   |              |              |              |   |              |              |             |   |              |              |             |   |              |              |             |   |              |              |             |   |             |              |              |   |             |              |             |   |              |             |              |   |              |              |             |   |             |             |              |   |             |             |              |   |             |             |              |   |             |              |             |   |             |             |              |   |             |             |             |   |             |             |             |   |              |             |             |   |             |             |             |   |             |             |             |   |              |             |             |   |              |             |              |   |              |             |             |   |              |             |             |
| H                                                                                                                                                          | -4.081957000                                                                                                                                                                                                                                                                                                                                                                                                                                                                                                                                                                                                                                                                                                                                                                                                                                                                                                                                                                                                                                                                                                                                                                                                                                                                                                                                                                                                                                                                                                                                                                                                                                                                                                                                                                                                                                                                                                                                                                                                                                                                                                                                                                                                                                                                                                                                                                                                                                                                                                                                                                                                                                                                                                                                                                                                                                                                                                                                                                                                                                                                                   | 2.502262000  | -0.000361000 |              |              |   |              |              |              |   |              |              |              |   |              |              |              |   |              |              |             |   |              |              |              |   |              |              |             |   |              |              |              |   |              |              |              |   |              |              |              |   |              |             |              |   |              |              |              |   |              |              |              |   |              |              |              |   |              |              |             |   |              |              |             |   |              |              |             |   |              |              |             |   |             |              |              |   |             |              |             |   |              |             |              |   |              |              |             |   |             |             |              |   |             |             |              |   |             |             |              |   |             |              |             |   |             |             |              |   |             |             |             |   |             |             |             |   |              |             |             |   |             |             |             |   |             |             |             |   |              |             |             |   |              |             |              |   |              |             |             |   |              |             |             |
| C                                                                                                                                                          | -2.055273000                                                                                                                                                                                                                                                                                                                                                                                                                                                                                                                                                                                                                                                                                                                                                                                                                                                                                                                                                                                                                                                                                                                                                                                                                                                                                                                                                                                                                                                                                                                                                                                                                                                                                                                                                                                                                                                                                                                                                                                                                                                                                                                                                                                                                                                                                                                                                                                                                                                                                                                                                                                                                                                                                                                                                                                                                                                                                                                                                                                                                                                                                   | 3.138199000  | 0.000959000  |              |              |   |              |              |              |   |              |              |              |   |              |              |              |   |              |              |             |   |              |              |              |   |              |              |             |   |              |              |              |   |              |              |              |   |              |              |              |   |              |             |              |   |              |              |              |   |              |              |              |   |              |              |              |   |              |              |             |   |              |              |             |   |              |              |             |   |              |              |             |   |             |              |              |   |             |              |             |   |              |             |              |   |              |              |             |   |             |             |              |   |             |             |              |   |             |             |              |   |             |              |             |   |             |             |              |   |             |             |             |   |             |             |             |   |              |             |             |   |             |             |             |   |             |             |             |   |              |             |             |   |              |             |              |   |              |             |             |   |              |             |             |
| H                                                                                                                                                          | -2.296912000                                                                                                                                                                                                                                                                                                                                                                                                                                                                                                                                                                                                                                                                                                                                                                                                                                                                                                                                                                                                                                                                                                                                                                                                                                                                                                                                                                                                                                                                                                                                                                                                                                                                                                                                                                                                                                                                                                                                                                                                                                                                                                                                                                                                                                                                                                                                                                                                                                                                                                                                                                                                                                                                                                                                                                                                                                                                                                                                                                                                                                                                                   | 4.195806000  | 0.003011000  |              |              |   |              |              |              |   |              |              |              |   |              |              |              |   |              |              |             |   |              |              |              |   |              |              |             |   |              |              |              |   |              |              |              |   |              |              |              |   |              |             |              |   |              |              |              |   |              |              |              |   |              |              |              |   |              |              |             |   |              |              |             |   |              |              |             |   |              |              |             |   |             |              |              |   |             |              |             |   |              |             |              |   |              |              |             |   |             |             |              |   |             |             |              |   |             |             |              |   |             |              |             |   |             |             |              |   |             |             |             |   |             |             |             |   |              |             |             |   |             |             |             |   |             |             |             |   |              |             |             |   |              |             |              |   |              |             |             |   |              |             |             |

|                                                                                                                                                               |                                                                                                                                                                                                                                                                                                                                                                                                                                                                                                                                                                                                                                                                                                                                                                                                                                                                                                                                                                                                                                                                                                                                                                                                                                                                                                                                                                                                                                                                                                                                                                                                                                                                                                                                                                                                                                                                                                                                                                                                                                                                                                                                                                                                                                                                                                                                                                                                                                                                                                                                                                                                                                                                                                                                                                                                                                                                                                                                                                                                                                                                                                                                                                                                                                                                                                                                                                                                                                                                                                                               |              |              |              |              |   |              |              |             |   |              |              |             |   |              |              |              |   |             |              |              |   |              |              |              |   |              |              |              |   |             |              |             |   |              |              |              |   |              |             |              |   |             |             |              |   |              |             |              |   |              |             |              |   |              |              |              |   |              |              |              |   |              |              |              |   |              |              |              |   |              |              |              |   |              |              |              |   |             |              |             |   |             |              |              |   |              |             |              |   |              |             |             |   |             |              |             |   |             |              |             |   |             |             |             |   |             |              |             |   |             |              |             |   |             |             |             |   |             |             |             |   |             |             |              |   |             |             |             |   |             |             |             |   |              |             |              |   |              |             |              |   |             |             |              |   |             |             |              |   |              |             |              |   |              |              |             |   |              |              |             |   |              |              |             |
|---------------------------------------------------------------------------------------------------------------------------------------------------------------|-------------------------------------------------------------------------------------------------------------------------------------------------------------------------------------------------------------------------------------------------------------------------------------------------------------------------------------------------------------------------------------------------------------------------------------------------------------------------------------------------------------------------------------------------------------------------------------------------------------------------------------------------------------------------------------------------------------------------------------------------------------------------------------------------------------------------------------------------------------------------------------------------------------------------------------------------------------------------------------------------------------------------------------------------------------------------------------------------------------------------------------------------------------------------------------------------------------------------------------------------------------------------------------------------------------------------------------------------------------------------------------------------------------------------------------------------------------------------------------------------------------------------------------------------------------------------------------------------------------------------------------------------------------------------------------------------------------------------------------------------------------------------------------------------------------------------------------------------------------------------------------------------------------------------------------------------------------------------------------------------------------------------------------------------------------------------------------------------------------------------------------------------------------------------------------------------------------------------------------------------------------------------------------------------------------------------------------------------------------------------------------------------------------------------------------------------------------------------------------------------------------------------------------------------------------------------------------------------------------------------------------------------------------------------------------------------------------------------------------------------------------------------------------------------------------------------------------------------------------------------------------------------------------------------------------------------------------------------------------------------------------------------------------------------------------------------------------------------------------------------------------------------------------------------------------------------------------------------------------------------------------------------------------------------------------------------------------------------------------------------------------------------------------------------------------------------------------------------------------------------------------------------------|--------------|--------------|--------------|--------------|---|--------------|--------------|-------------|---|--------------|--------------|-------------|---|--------------|--------------|--------------|---|-------------|--------------|--------------|---|--------------|--------------|--------------|---|--------------|--------------|--------------|---|-------------|--------------|-------------|---|--------------|--------------|--------------|---|--------------|-------------|--------------|---|-------------|-------------|--------------|---|--------------|-------------|--------------|---|--------------|-------------|--------------|---|--------------|--------------|--------------|---|--------------|--------------|--------------|---|--------------|--------------|--------------|---|--------------|--------------|--------------|---|--------------|--------------|--------------|---|--------------|--------------|--------------|---|-------------|--------------|-------------|---|-------------|--------------|--------------|---|--------------|-------------|--------------|---|--------------|-------------|-------------|---|-------------|--------------|-------------|---|-------------|--------------|-------------|---|-------------|-------------|-------------|---|-------------|--------------|-------------|---|-------------|--------------|-------------|---|-------------|-------------|-------------|---|-------------|-------------|-------------|---|-------------|-------------|--------------|---|-------------|-------------|-------------|---|-------------|-------------|-------------|---|--------------|-------------|--------------|---|--------------|-------------|--------------|---|-------------|-------------|--------------|---|-------------|-------------|--------------|---|--------------|-------------|--------------|---|--------------|--------------|-------------|---|--------------|--------------|-------------|---|--------------|--------------|-------------|
| 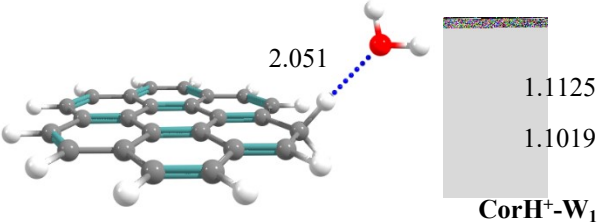 <p style="text-align: center;"><b>CorH<sup>+</sup>-W<sub>1</sub></b></p>    | <table border="1"> <tbody> <tr><td>H</td><td>-3.939754000</td><td>-2.033985000</td><td>-0.865603000</td></tr> <tr><td>C</td><td>1.987738000</td><td>-3.374230000</td><td>0.081081000</td></tr> <tr><td>C</td><td>2.375522000</td><td>-2.009191000</td><td>0.139643000</td></tr> <tr><td>C</td><td>1.380648000</td><td>-1.008525000</td><td>0.010945000</td></tr> <tr><td>C</td><td>0.022325000</td><td>-1.374704000</td><td>-0.154241000</td></tr> <tr><td>C</td><td>-0.336442000</td><td>-2.740393000</td><td>-0.214375000</td></tr> <tr><td>C</td><td>0.680654000</td><td>-3.727662000</td><td>-0.089288000</td></tr> <tr><td>C</td><td>1.739345000</td><td>0.357715000</td><td>0.074943000</td></tr> <tr><td>C</td><td>-0.977165000</td><td>-0.374005000</td><td>-0.286092000</td></tr> <tr><td>C</td><td>-0.609215000</td><td>1.000890000</td><td>-0.227028000</td></tr> <tr><td>C</td><td>0.742790000</td><td>1.364185000</td><td>-0.062200000</td></tr> <tr><td>C</td><td>-1.603703000</td><td>2.040006000</td><td>-0.361326000</td></tr> <tr><td>C</td><td>-2.912085000</td><td>1.688123000</td><td>-0.539542000</td></tr> <tr><td>C</td><td>-3.368571000</td><td>0.301209000</td><td>-0.573339000</td></tr> <tr><td>C</td><td>-2.325840000</td><td>-0.747315000</td><td>-0.457699000</td></tr> <tr><td>C</td><td>-2.663316000</td><td>-2.102179000</td><td>-0.507134000</td></tr> <tr><td>C</td><td>-1.692236000</td><td>-3.075505000</td><td>-0.389275000</td></tr> <tr><td>H</td><td>-1.972783000</td><td>-4.123479000</td><td>-0.432755000</td></tr> <tr><td>H</td><td>-3.702267000</td><td>-2.387753000</td><td>-0.637041000</td></tr> <tr><td>H</td><td>2.752179000</td><td>-4.138542000</td><td>0.175497000</td></tr> <tr><td>H</td><td>0.399293000</td><td>-4.774997000</td><td>-0.133379000</td></tr> <tr><td>H</td><td>-3.663418000</td><td>2.466727000</td><td>-0.644876000</td></tr> <tr><td>H</td><td>-4.116683000</td><td>0.176886000</td><td>0.240619000</td></tr> <tr><td>C</td><td>3.726583000</td><td>-1.616431000</td><td>0.314717000</td></tr> <tr><td>C</td><td>4.074755000</td><td>-0.295692000</td><td>0.366278000</td></tr> <tr><td>C</td><td>3.094002000</td><td>0.722964000</td><td>0.244112000</td></tr> <tr><td>H</td><td>4.486490000</td><td>-2.385193000</td><td>0.409237000</td></tr> <tr><td>H</td><td>5.112955000</td><td>-0.009145000</td><td>0.500103000</td></tr> <tr><td>C</td><td>3.423956000</td><td>2.095214000</td><td>0.292548000</td></tr> <tr><td>C</td><td>2.464266000</td><td>3.073665000</td><td>0.171214000</td></tr> <tr><td>C</td><td>1.110283000</td><td>2.738803000</td><td>-0.005040000</td></tr> <tr><td>H</td><td>4.464086000</td><td>2.377016000</td><td>0.426682000</td></tr> <tr><td>H</td><td>2.747471000</td><td>4.120068000</td><td>0.211793000</td></tr> <tr><td>C</td><td>-1.196364000</td><td>3.416383000</td><td>-0.307108000</td></tr> <tr><td>H</td><td>-1.957081000</td><td>4.183544000</td><td>-0.407345000</td></tr> <tr><td>C</td><td>0.104871000</td><td>3.747710000</td><td>-0.136429000</td></tr> <tr><td>H</td><td>0.408157000</td><td>4.788535000</td><td>-0.095099000</td></tr> <tr><td>H</td><td>-3.985640000</td><td>0.143372000</td><td>-1.472618000</td></tr> <tr><td>O</td><td>-5.561923000</td><td>-0.089512000</td><td>1.672231000</td></tr> <tr><td>H</td><td>-6.515486000</td><td>-0.055935000</td><td>1.565144000</td></tr> <tr><td>H</td><td>-5.418688000</td><td>-0.271231000</td><td>2.604010000</td></tr> </tbody> </table> | H            | -3.939754000 | -2.033985000 | -0.865603000 | C | 1.987738000  | -3.374230000 | 0.081081000 | C | 2.375522000  | -2.009191000 | 0.139643000 | C | 1.380648000  | -1.008525000 | 0.010945000  | C | 0.022325000 | -1.374704000 | -0.154241000 | C | -0.336442000 | -2.740393000 | -0.214375000 | C | 0.680654000  | -3.727662000 | -0.089288000 | C | 1.739345000 | 0.357715000  | 0.074943000 | C | -0.977165000 | -0.374005000 | -0.286092000 | C | -0.609215000 | 1.000890000 | -0.227028000 | C | 0.742790000 | 1.364185000 | -0.062200000 | C | -1.603703000 | 2.040006000 | -0.361326000 | C | -2.912085000 | 1.688123000 | -0.539542000 | C | -3.368571000 | 0.301209000  | -0.573339000 | C | -2.325840000 | -0.747315000 | -0.457699000 | C | -2.663316000 | -2.102179000 | -0.507134000 | C | -1.692236000 | -3.075505000 | -0.389275000 | H | -1.972783000 | -4.123479000 | -0.432755000 | H | -3.702267000 | -2.387753000 | -0.637041000 | H | 2.752179000 | -4.138542000 | 0.175497000 | H | 0.399293000 | -4.774997000 | -0.133379000 | H | -3.663418000 | 2.466727000 | -0.644876000 | H | -4.116683000 | 0.176886000 | 0.240619000 | C | 3.726583000 | -1.616431000 | 0.314717000 | C | 4.074755000 | -0.295692000 | 0.366278000 | C | 3.094002000 | 0.722964000 | 0.244112000 | H | 4.486490000 | -2.385193000 | 0.409237000 | H | 5.112955000 | -0.009145000 | 0.500103000 | C | 3.423956000 | 2.095214000 | 0.292548000 | C | 2.464266000 | 3.073665000 | 0.171214000 | C | 1.110283000 | 2.738803000 | -0.005040000 | H | 4.464086000 | 2.377016000 | 0.426682000 | H | 2.747471000 | 4.120068000 | 0.211793000 | C | -1.196364000 | 3.416383000 | -0.307108000 | H | -1.957081000 | 4.183544000 | -0.407345000 | C | 0.104871000 | 3.747710000 | -0.136429000 | H | 0.408157000 | 4.788535000 | -0.095099000 | H | -3.985640000 | 0.143372000 | -1.472618000 | O | -5.561923000 | -0.089512000 | 1.672231000 | H | -6.515486000 | -0.055935000 | 1.565144000 | H | -5.418688000 | -0.271231000 | 2.604010000 |
| H                                                                                                                                                             | -3.939754000                                                                                                                                                                                                                                                                                                                                                                                                                                                                                                                                                                                                                                                                                                                                                                                                                                                                                                                                                                                                                                                                                                                                                                                                                                                                                                                                                                                                                                                                                                                                                                                                                                                                                                                                                                                                                                                                                                                                                                                                                                                                                                                                                                                                                                                                                                                                                                                                                                                                                                                                                                                                                                                                                                                                                                                                                                                                                                                                                                                                                                                                                                                                                                                                                                                                                                                                                                                                                                                                                                                  | -2.033985000 | -0.865603000 |              |              |   |              |              |             |   |              |              |             |   |              |              |              |   |             |              |              |   |              |              |              |   |              |              |              |   |             |              |             |   |              |              |              |   |              |             |              |   |             |             |              |   |              |             |              |   |              |             |              |   |              |              |              |   |              |              |              |   |              |              |              |   |              |              |              |   |              |              |              |   |              |              |              |   |             |              |             |   |             |              |              |   |              |             |              |   |              |             |             |   |             |              |             |   |             |              |             |   |             |             |             |   |             |              |             |   |             |              |             |   |             |             |             |   |             |             |             |   |             |             |              |   |             |             |             |   |             |             |             |   |              |             |              |   |              |             |              |   |             |             |              |   |             |             |              |   |              |             |              |   |              |              |             |   |              |              |             |   |              |              |             |
| C                                                                                                                                                             | 1.987738000                                                                                                                                                                                                                                                                                                                                                                                                                                                                                                                                                                                                                                                                                                                                                                                                                                                                                                                                                                                                                                                                                                                                                                                                                                                                                                                                                                                                                                                                                                                                                                                                                                                                                                                                                                                                                                                                                                                                                                                                                                                                                                                                                                                                                                                                                                                                                                                                                                                                                                                                                                                                                                                                                                                                                                                                                                                                                                                                                                                                                                                                                                                                                                                                                                                                                                                                                                                                                                                                                                                   | -3.374230000 | 0.081081000  |              |              |   |              |              |             |   |              |              |             |   |              |              |              |   |             |              |              |   |              |              |              |   |              |              |              |   |             |              |             |   |              |              |              |   |              |             |              |   |             |             |              |   |              |             |              |   |              |             |              |   |              |              |              |   |              |              |              |   |              |              |              |   |              |              |              |   |              |              |              |   |              |              |              |   |             |              |             |   |             |              |              |   |              |             |              |   |              |             |             |   |             |              |             |   |             |              |             |   |             |             |             |   |             |              |             |   |             |              |             |   |             |             |             |   |             |             |             |   |             |             |              |   |             |             |             |   |             |             |             |   |              |             |              |   |              |             |              |   |             |             |              |   |             |             |              |   |              |             |              |   |              |              |             |   |              |              |             |   |              |              |             |
| C                                                                                                                                                             | 2.375522000                                                                                                                                                                                                                                                                                                                                                                                                                                                                                                                                                                                                                                                                                                                                                                                                                                                                                                                                                                                                                                                                                                                                                                                                                                                                                                                                                                                                                                                                                                                                                                                                                                                                                                                                                                                                                                                                                                                                                                                                                                                                                                                                                                                                                                                                                                                                                                                                                                                                                                                                                                                                                                                                                                                                                                                                                                                                                                                                                                                                                                                                                                                                                                                                                                                                                                                                                                                                                                                                                                                   | -2.009191000 | 0.139643000  |              |              |   |              |              |             |   |              |              |             |   |              |              |              |   |             |              |              |   |              |              |              |   |              |              |              |   |             |              |             |   |              |              |              |   |              |             |              |   |             |             |              |   |              |             |              |   |              |             |              |   |              |              |              |   |              |              |              |   |              |              |              |   |              |              |              |   |              |              |              |   |              |              |              |   |             |              |             |   |             |              |              |   |              |             |              |   |              |             |             |   |             |              |             |   |             |              |             |   |             |             |             |   |             |              |             |   |             |              |             |   |             |             |             |   |             |             |             |   |             |             |              |   |             |             |             |   |             |             |             |   |              |             |              |   |              |             |              |   |             |             |              |   |             |             |              |   |              |             |              |   |              |              |             |   |              |              |             |   |              |              |             |
| C                                                                                                                                                             | 1.380648000                                                                                                                                                                                                                                                                                                                                                                                                                                                                                                                                                                                                                                                                                                                                                                                                                                                                                                                                                                                                                                                                                                                                                                                                                                                                                                                                                                                                                                                                                                                                                                                                                                                                                                                                                                                                                                                                                                                                                                                                                                                                                                                                                                                                                                                                                                                                                                                                                                                                                                                                                                                                                                                                                                                                                                                                                                                                                                                                                                                                                                                                                                                                                                                                                                                                                                                                                                                                                                                                                                                   | -1.008525000 | 0.010945000  |              |              |   |              |              |             |   |              |              |             |   |              |              |              |   |             |              |              |   |              |              |              |   |              |              |              |   |             |              |             |   |              |              |              |   |              |             |              |   |             |             |              |   |              |             |              |   |              |             |              |   |              |              |              |   |              |              |              |   |              |              |              |   |              |              |              |   |              |              |              |   |              |              |              |   |             |              |             |   |             |              |              |   |              |             |              |   |              |             |             |   |             |              |             |   |             |              |             |   |             |             |             |   |             |              |             |   |             |              |             |   |             |             |             |   |             |             |             |   |             |             |              |   |             |             |             |   |             |             |             |   |              |             |              |   |              |             |              |   |             |             |              |   |             |             |              |   |              |             |              |   |              |              |             |   |              |              |             |   |              |              |             |
| C                                                                                                                                                             | 0.022325000                                                                                                                                                                                                                                                                                                                                                                                                                                                                                                                                                                                                                                                                                                                                                                                                                                                                                                                                                                                                                                                                                                                                                                                                                                                                                                                                                                                                                                                                                                                                                                                                                                                                                                                                                                                                                                                                                                                                                                                                                                                                                                                                                                                                                                                                                                                                                                                                                                                                                                                                                                                                                                                                                                                                                                                                                                                                                                                                                                                                                                                                                                                                                                                                                                                                                                                                                                                                                                                                                                                   | -1.374704000 | -0.154241000 |              |              |   |              |              |             |   |              |              |             |   |              |              |              |   |             |              |              |   |              |              |              |   |              |              |              |   |             |              |             |   |              |              |              |   |              |             |              |   |             |             |              |   |              |             |              |   |              |             |              |   |              |              |              |   |              |              |              |   |              |              |              |   |              |              |              |   |              |              |              |   |              |              |              |   |             |              |             |   |             |              |              |   |              |             |              |   |              |             |             |   |             |              |             |   |             |              |             |   |             |             |             |   |             |              |             |   |             |              |             |   |             |             |             |   |             |             |             |   |             |             |              |   |             |             |             |   |             |             |             |   |              |             |              |   |              |             |              |   |             |             |              |   |             |             |              |   |              |             |              |   |              |              |             |   |              |              |             |   |              |              |             |
| C                                                                                                                                                             | -0.336442000                                                                                                                                                                                                                                                                                                                                                                                                                                                                                                                                                                                                                                                                                                                                                                                                                                                                                                                                                                                                                                                                                                                                                                                                                                                                                                                                                                                                                                                                                                                                                                                                                                                                                                                                                                                                                                                                                                                                                                                                                                                                                                                                                                                                                                                                                                                                                                                                                                                                                                                                                                                                                                                                                                                                                                                                                                                                                                                                                                                                                                                                                                                                                                                                                                                                                                                                                                                                                                                                                                                  | -2.740393000 | -0.214375000 |              |              |   |              |              |             |   |              |              |             |   |              |              |              |   |             |              |              |   |              |              |              |   |              |              |              |   |             |              |             |   |              |              |              |   |              |             |              |   |             |             |              |   |              |             |              |   |              |             |              |   |              |              |              |   |              |              |              |   |              |              |              |   |              |              |              |   |              |              |              |   |              |              |              |   |             |              |             |   |             |              |              |   |              |             |              |   |              |             |             |   |             |              |             |   |             |              |             |   |             |             |             |   |             |              |             |   |             |              |             |   |             |             |             |   |             |             |             |   |             |             |              |   |             |             |             |   |             |             |             |   |              |             |              |   |              |             |              |   |             |             |              |   |             |             |              |   |              |             |              |   |              |              |             |   |              |              |             |   |              |              |             |
| C                                                                                                                                                             | 0.680654000                                                                                                                                                                                                                                                                                                                                                                                                                                                                                                                                                                                                                                                                                                                                                                                                                                                                                                                                                                                                                                                                                                                                                                                                                                                                                                                                                                                                                                                                                                                                                                                                                                                                                                                                                                                                                                                                                                                                                                                                                                                                                                                                                                                                                                                                                                                                                                                                                                                                                                                                                                                                                                                                                                                                                                                                                                                                                                                                                                                                                                                                                                                                                                                                                                                                                                                                                                                                                                                                                                                   | -3.727662000 | -0.089288000 |              |              |   |              |              |             |   |              |              |             |   |              |              |              |   |             |              |              |   |              |              |              |   |              |              |              |   |             |              |             |   |              |              |              |   |              |             |              |   |             |             |              |   |              |             |              |   |              |             |              |   |              |              |              |   |              |              |              |   |              |              |              |   |              |              |              |   |              |              |              |   |              |              |              |   |             |              |             |   |             |              |              |   |              |             |              |   |              |             |             |   |             |              |             |   |             |              |             |   |             |             |             |   |             |              |             |   |             |              |             |   |             |             |             |   |             |             |             |   |             |             |              |   |             |             |             |   |             |             |             |   |              |             |              |   |              |             |              |   |             |             |              |   |             |             |              |   |              |             |              |   |              |              |             |   |              |              |             |   |              |              |             |
| C                                                                                                                                                             | 1.739345000                                                                                                                                                                                                                                                                                                                                                                                                                                                                                                                                                                                                                                                                                                                                                                                                                                                                                                                                                                                                                                                                                                                                                                                                                                                                                                                                                                                                                                                                                                                                                                                                                                                                                                                                                                                                                                                                                                                                                                                                                                                                                                                                                                                                                                                                                                                                                                                                                                                                                                                                                                                                                                                                                                                                                                                                                                                                                                                                                                                                                                                                                                                                                                                                                                                                                                                                                                                                                                                                                                                   | 0.357715000  | 0.074943000  |              |              |   |              |              |             |   |              |              |             |   |              |              |              |   |             |              |              |   |              |              |              |   |              |              |              |   |             |              |             |   |              |              |              |   |              |             |              |   |             |             |              |   |              |             |              |   |              |             |              |   |              |              |              |   |              |              |              |   |              |              |              |   |              |              |              |   |              |              |              |   |              |              |              |   |             |              |             |   |             |              |              |   |              |             |              |   |              |             |             |   |             |              |             |   |             |              |             |   |             |             |             |   |             |              |             |   |             |              |             |   |             |             |             |   |             |             |             |   |             |             |              |   |             |             |             |   |             |             |             |   |              |             |              |   |              |             |              |   |             |             |              |   |             |             |              |   |              |             |              |   |              |              |             |   |              |              |             |   |              |              |             |
| C                                                                                                                                                             | -0.977165000                                                                                                                                                                                                                                                                                                                                                                                                                                                                                                                                                                                                                                                                                                                                                                                                                                                                                                                                                                                                                                                                                                                                                                                                                                                                                                                                                                                                                                                                                                                                                                                                                                                                                                                                                                                                                                                                                                                                                                                                                                                                                                                                                                                                                                                                                                                                                                                                                                                                                                                                                                                                                                                                                                                                                                                                                                                                                                                                                                                                                                                                                                                                                                                                                                                                                                                                                                                                                                                                                                                  | -0.374005000 | -0.286092000 |              |              |   |              |              |             |   |              |              |             |   |              |              |              |   |             |              |              |   |              |              |              |   |              |              |              |   |             |              |             |   |              |              |              |   |              |             |              |   |             |             |              |   |              |             |              |   |              |             |              |   |              |              |              |   |              |              |              |   |              |              |              |   |              |              |              |   |              |              |              |   |              |              |              |   |             |              |             |   |             |              |              |   |              |             |              |   |              |             |             |   |             |              |             |   |             |              |             |   |             |             |             |   |             |              |             |   |             |              |             |   |             |             |             |   |             |             |             |   |             |             |              |   |             |             |             |   |             |             |             |   |              |             |              |   |              |             |              |   |             |             |              |   |             |             |              |   |              |             |              |   |              |              |             |   |              |              |             |   |              |              |             |
| C                                                                                                                                                             | -0.609215000                                                                                                                                                                                                                                                                                                                                                                                                                                                                                                                                                                                                                                                                                                                                                                                                                                                                                                                                                                                                                                                                                                                                                                                                                                                                                                                                                                                                                                                                                                                                                                                                                                                                                                                                                                                                                                                                                                                                                                                                                                                                                                                                                                                                                                                                                                                                                                                                                                                                                                                                                                                                                                                                                                                                                                                                                                                                                                                                                                                                                                                                                                                                                                                                                                                                                                                                                                                                                                                                                                                  | 1.000890000  | -0.227028000 |              |              |   |              |              |             |   |              |              |             |   |              |              |              |   |             |              |              |   |              |              |              |   |              |              |              |   |             |              |             |   |              |              |              |   |              |             |              |   |             |             |              |   |              |             |              |   |              |             |              |   |              |              |              |   |              |              |              |   |              |              |              |   |              |              |              |   |              |              |              |   |              |              |              |   |             |              |             |   |             |              |              |   |              |             |              |   |              |             |             |   |             |              |             |   |             |              |             |   |             |             |             |   |             |              |             |   |             |              |             |   |             |             |             |   |             |             |             |   |             |             |              |   |             |             |             |   |             |             |             |   |              |             |              |   |              |             |              |   |             |             |              |   |             |             |              |   |              |             |              |   |              |              |             |   |              |              |             |   |              |              |             |
| C                                                                                                                                                             | 0.742790000                                                                                                                                                                                                                                                                                                                                                                                                                                                                                                                                                                                                                                                                                                                                                                                                                                                                                                                                                                                                                                                                                                                                                                                                                                                                                                                                                                                                                                                                                                                                                                                                                                                                                                                                                                                                                                                                                                                                                                                                                                                                                                                                                                                                                                                                                                                                                                                                                                                                                                                                                                                                                                                                                                                                                                                                                                                                                                                                                                                                                                                                                                                                                                                                                                                                                                                                                                                                                                                                                                                   | 1.364185000  | -0.062200000 |              |              |   |              |              |             |   |              |              |             |   |              |              |              |   |             |              |              |   |              |              |              |   |              |              |              |   |             |              |             |   |              |              |              |   |              |             |              |   |             |             |              |   |              |             |              |   |              |             |              |   |              |              |              |   |              |              |              |   |              |              |              |   |              |              |              |   |              |              |              |   |              |              |              |   |             |              |             |   |             |              |              |   |              |             |              |   |              |             |             |   |             |              |             |   |             |              |             |   |             |             |             |   |             |              |             |   |             |              |             |   |             |             |             |   |             |             |             |   |             |             |              |   |             |             |             |   |             |             |             |   |              |             |              |   |              |             |              |   |             |             |              |   |             |             |              |   |              |             |              |   |              |              |             |   |              |              |             |   |              |              |             |
| C                                                                                                                                                             | -1.603703000                                                                                                                                                                                                                                                                                                                                                                                                                                                                                                                                                                                                                                                                                                                                                                                                                                                                                                                                                                                                                                                                                                                                                                                                                                                                                                                                                                                                                                                                                                                                                                                                                                                                                                                                                                                                                                                                                                                                                                                                                                                                                                                                                                                                                                                                                                                                                                                                                                                                                                                                                                                                                                                                                                                                                                                                                                                                                                                                                                                                                                                                                                                                                                                                                                                                                                                                                                                                                                                                                                                  | 2.040006000  | -0.361326000 |              |              |   |              |              |             |   |              |              |             |   |              |              |              |   |             |              |              |   |              |              |              |   |              |              |              |   |             |              |             |   |              |              |              |   |              |             |              |   |             |             |              |   |              |             |              |   |              |             |              |   |              |              |              |   |              |              |              |   |              |              |              |   |              |              |              |   |              |              |              |   |              |              |              |   |             |              |             |   |             |              |              |   |              |             |              |   |              |             |             |   |             |              |             |   |             |              |             |   |             |             |             |   |             |              |             |   |             |              |             |   |             |             |             |   |             |             |             |   |             |             |              |   |             |             |             |   |             |             |             |   |              |             |              |   |              |             |              |   |             |             |              |   |             |             |              |   |              |             |              |   |              |              |             |   |              |              |             |   |              |              |             |
| C                                                                                                                                                             | -2.912085000                                                                                                                                                                                                                                                                                                                                                                                                                                                                                                                                                                                                                                                                                                                                                                                                                                                                                                                                                                                                                                                                                                                                                                                                                                                                                                                                                                                                                                                                                                                                                                                                                                                                                                                                                                                                                                                                                                                                                                                                                                                                                                                                                                                                                                                                                                                                                                                                                                                                                                                                                                                                                                                                                                                                                                                                                                                                                                                                                                                                                                                                                                                                                                                                                                                                                                                                                                                                                                                                                                                  | 1.688123000  | -0.539542000 |              |              |   |              |              |             |   |              |              |             |   |              |              |              |   |             |              |              |   |              |              |              |   |              |              |              |   |             |              |             |   |              |              |              |   |              |             |              |   |             |             |              |   |              |             |              |   |              |             |              |   |              |              |              |   |              |              |              |   |              |              |              |   |              |              |              |   |              |              |              |   |              |              |              |   |             |              |             |   |             |              |              |   |              |             |              |   |              |             |             |   |             |              |             |   |             |              |             |   |             |             |             |   |             |              |             |   |             |              |             |   |             |             |             |   |             |             |             |   |             |             |              |   |             |             |             |   |             |             |             |   |              |             |              |   |              |             |              |   |             |             |              |   |             |             |              |   |              |             |              |   |              |              |             |   |              |              |             |   |              |              |             |
| C                                                                                                                                                             | -3.368571000                                                                                                                                                                                                                                                                                                                                                                                                                                                                                                                                                                                                                                                                                                                                                                                                                                                                                                                                                                                                                                                                                                                                                                                                                                                                                                                                                                                                                                                                                                                                                                                                                                                                                                                                                                                                                                                                                                                                                                                                                                                                                                                                                                                                                                                                                                                                                                                                                                                                                                                                                                                                                                                                                                                                                                                                                                                                                                                                                                                                                                                                                                                                                                                                                                                                                                                                                                                                                                                                                                                  | 0.301209000  | -0.573339000 |              |              |   |              |              |             |   |              |              |             |   |              |              |              |   |             |              |              |   |              |              |              |   |              |              |              |   |             |              |             |   |              |              |              |   |              |             |              |   |             |             |              |   |              |             |              |   |              |             |              |   |              |              |              |   |              |              |              |   |              |              |              |   |              |              |              |   |              |              |              |   |              |              |              |   |             |              |             |   |             |              |              |   |              |             |              |   |              |             |             |   |             |              |             |   |             |              |             |   |             |             |             |   |             |              |             |   |             |              |             |   |             |             |             |   |             |             |             |   |             |             |              |   |             |             |             |   |             |             |             |   |              |             |              |   |              |             |              |   |             |             |              |   |             |             |              |   |              |             |              |   |              |              |             |   |              |              |             |   |              |              |             |
| C                                                                                                                                                             | -2.325840000                                                                                                                                                                                                                                                                                                                                                                                                                                                                                                                                                                                                                                                                                                                                                                                                                                                                                                                                                                                                                                                                                                                                                                                                                                                                                                                                                                                                                                                                                                                                                                                                                                                                                                                                                                                                                                                                                                                                                                                                                                                                                                                                                                                                                                                                                                                                                                                                                                                                                                                                                                                                                                                                                                                                                                                                                                                                                                                                                                                                                                                                                                                                                                                                                                                                                                                                                                                                                                                                                                                  | -0.747315000 | -0.457699000 |              |              |   |              |              |             |   |              |              |             |   |              |              |              |   |             |              |              |   |              |              |              |   |              |              |              |   |             |              |             |   |              |              |              |   |              |             |              |   |             |             |              |   |              |             |              |   |              |             |              |   |              |              |              |   |              |              |              |   |              |              |              |   |              |              |              |   |              |              |              |   |              |              |              |   |             |              |             |   |             |              |              |   |              |             |              |   |              |             |             |   |             |              |             |   |             |              |             |   |             |             |             |   |             |              |             |   |             |              |             |   |             |             |             |   |             |             |             |   |             |             |              |   |             |             |             |   |             |             |             |   |              |             |              |   |              |             |              |   |             |             |              |   |             |             |              |   |              |             |              |   |              |              |             |   |              |              |             |   |              |              |             |
| C                                                                                                                                                             | -2.663316000                                                                                                                                                                                                                                                                                                                                                                                                                                                                                                                                                                                                                                                                                                                                                                                                                                                                                                                                                                                                                                                                                                                                                                                                                                                                                                                                                                                                                                                                                                                                                                                                                                                                                                                                                                                                                                                                                                                                                                                                                                                                                                                                                                                                                                                                                                                                                                                                                                                                                                                                                                                                                                                                                                                                                                                                                                                                                                                                                                                                                                                                                                                                                                                                                                                                                                                                                                                                                                                                                                                  | -2.102179000 | -0.507134000 |              |              |   |              |              |             |   |              |              |             |   |              |              |              |   |             |              |              |   |              |              |              |   |              |              |              |   |             |              |             |   |              |              |              |   |              |             |              |   |             |             |              |   |              |             |              |   |              |             |              |   |              |              |              |   |              |              |              |   |              |              |              |   |              |              |              |   |              |              |              |   |              |              |              |   |             |              |             |   |             |              |              |   |              |             |              |   |              |             |             |   |             |              |             |   |             |              |             |   |             |             |             |   |             |              |             |   |             |              |             |   |             |             |             |   |             |             |             |   |             |             |              |   |             |             |             |   |             |             |             |   |              |             |              |   |              |             |              |   |             |             |              |   |             |             |              |   |              |             |              |   |              |              |             |   |              |              |             |   |              |              |             |
| C                                                                                                                                                             | -1.692236000                                                                                                                                                                                                                                                                                                                                                                                                                                                                                                                                                                                                                                                                                                                                                                                                                                                                                                                                                                                                                                                                                                                                                                                                                                                                                                                                                                                                                                                                                                                                                                                                                                                                                                                                                                                                                                                                                                                                                                                                                                                                                                                                                                                                                                                                                                                                                                                                                                                                                                                                                                                                                                                                                                                                                                                                                                                                                                                                                                                                                                                                                                                                                                                                                                                                                                                                                                                                                                                                                                                  | -3.075505000 | -0.389275000 |              |              |   |              |              |             |   |              |              |             |   |              |              |              |   |             |              |              |   |              |              |              |   |              |              |              |   |             |              |             |   |              |              |              |   |              |             |              |   |             |             |              |   |              |             |              |   |              |             |              |   |              |              |              |   |              |              |              |   |              |              |              |   |              |              |              |   |              |              |              |   |              |              |              |   |             |              |             |   |             |              |              |   |              |             |              |   |              |             |             |   |             |              |             |   |             |              |             |   |             |             |             |   |             |              |             |   |             |              |             |   |             |             |             |   |             |             |             |   |             |             |              |   |             |             |             |   |             |             |             |   |              |             |              |   |              |             |              |   |             |             |              |   |             |             |              |   |              |             |              |   |              |              |             |   |              |              |             |   |              |              |             |
| H                                                                                                                                                             | -1.972783000                                                                                                                                                                                                                                                                                                                                                                                                                                                                                                                                                                                                                                                                                                                                                                                                                                                                                                                                                                                                                                                                                                                                                                                                                                                                                                                                                                                                                                                                                                                                                                                                                                                                                                                                                                                                                                                                                                                                                                                                                                                                                                                                                                                                                                                                                                                                                                                                                                                                                                                                                                                                                                                                                                                                                                                                                                                                                                                                                                                                                                                                                                                                                                                                                                                                                                                                                                                                                                                                                                                  | -4.123479000 | -0.432755000 |              |              |   |              |              |             |   |              |              |             |   |              |              |              |   |             |              |              |   |              |              |              |   |              |              |              |   |             |              |             |   |              |              |              |   |              |             |              |   |             |             |              |   |              |             |              |   |              |             |              |   |              |              |              |   |              |              |              |   |              |              |              |   |              |              |              |   |              |              |              |   |              |              |              |   |             |              |             |   |             |              |              |   |              |             |              |   |              |             |             |   |             |              |             |   |             |              |             |   |             |             |             |   |             |              |             |   |             |              |             |   |             |             |             |   |             |             |             |   |             |             |              |   |             |             |             |   |             |             |             |   |              |             |              |   |              |             |              |   |             |             |              |   |             |             |              |   |              |             |              |   |              |              |             |   |              |              |             |   |              |              |             |
| H                                                                                                                                                             | -3.702267000                                                                                                                                                                                                                                                                                                                                                                                                                                                                                                                                                                                                                                                                                                                                                                                                                                                                                                                                                                                                                                                                                                                                                                                                                                                                                                                                                                                                                                                                                                                                                                                                                                                                                                                                                                                                                                                                                                                                                                                                                                                                                                                                                                                                                                                                                                                                                                                                                                                                                                                                                                                                                                                                                                                                                                                                                                                                                                                                                                                                                                                                                                                                                                                                                                                                                                                                                                                                                                                                                                                  | -2.387753000 | -0.637041000 |              |              |   |              |              |             |   |              |              |             |   |              |              |              |   |             |              |              |   |              |              |              |   |              |              |              |   |             |              |             |   |              |              |              |   |              |             |              |   |             |             |              |   |              |             |              |   |              |             |              |   |              |              |              |   |              |              |              |   |              |              |              |   |              |              |              |   |              |              |              |   |              |              |              |   |             |              |             |   |             |              |              |   |              |             |              |   |              |             |             |   |             |              |             |   |             |              |             |   |             |             |             |   |             |              |             |   |             |              |             |   |             |             |             |   |             |             |             |   |             |             |              |   |             |             |             |   |             |             |             |   |              |             |              |   |              |             |              |   |             |             |              |   |             |             |              |   |              |             |              |   |              |              |             |   |              |              |             |   |              |              |             |
| H                                                                                                                                                             | 2.752179000                                                                                                                                                                                                                                                                                                                                                                                                                                                                                                                                                                                                                                                                                                                                                                                                                                                                                                                                                                                                                                                                                                                                                                                                                                                                                                                                                                                                                                                                                                                                                                                                                                                                                                                                                                                                                                                                                                                                                                                                                                                                                                                                                                                                                                                                                                                                                                                                                                                                                                                                                                                                                                                                                                                                                                                                                                                                                                                                                                                                                                                                                                                                                                                                                                                                                                                                                                                                                                                                                                                   | -4.138542000 | 0.175497000  |              |              |   |              |              |             |   |              |              |             |   |              |              |              |   |             |              |              |   |              |              |              |   |              |              |              |   |             |              |             |   |              |              |              |   |              |             |              |   |             |             |              |   |              |             |              |   |              |             |              |   |              |              |              |   |              |              |              |   |              |              |              |   |              |              |              |   |              |              |              |   |              |              |              |   |             |              |             |   |             |              |              |   |              |             |              |   |              |             |             |   |             |              |             |   |             |              |             |   |             |             |             |   |             |              |             |   |             |              |             |   |             |             |             |   |             |             |             |   |             |             |              |   |             |             |             |   |             |             |             |   |              |             |              |   |              |             |              |   |             |             |              |   |             |             |              |   |              |             |              |   |              |              |             |   |              |              |             |   |              |              |             |
| H                                                                                                                                                             | 0.399293000                                                                                                                                                                                                                                                                                                                                                                                                                                                                                                                                                                                                                                                                                                                                                                                                                                                                                                                                                                                                                                                                                                                                                                                                                                                                                                                                                                                                                                                                                                                                                                                                                                                                                                                                                                                                                                                                                                                                                                                                                                                                                                                                                                                                                                                                                                                                                                                                                                                                                                                                                                                                                                                                                                                                                                                                                                                                                                                                                                                                                                                                                                                                                                                                                                                                                                                                                                                                                                                                                                                   | -4.774997000 | -0.133379000 |              |              |   |              |              |             |   |              |              |             |   |              |              |              |   |             |              |              |   |              |              |              |   |              |              |              |   |             |              |             |   |              |              |              |   |              |             |              |   |             |             |              |   |              |             |              |   |              |             |              |   |              |              |              |   |              |              |              |   |              |              |              |   |              |              |              |   |              |              |              |   |              |              |              |   |             |              |             |   |             |              |              |   |              |             |              |   |              |             |             |   |             |              |             |   |             |              |             |   |             |             |             |   |             |              |             |   |             |              |             |   |             |             |             |   |             |             |             |   |             |             |              |   |             |             |             |   |             |             |             |   |              |             |              |   |              |             |              |   |             |             |              |   |             |             |              |   |              |             |              |   |              |              |             |   |              |              |             |   |              |              |             |
| H                                                                                                                                                             | -3.663418000                                                                                                                                                                                                                                                                                                                                                                                                                                                                                                                                                                                                                                                                                                                                                                                                                                                                                                                                                                                                                                                                                                                                                                                                                                                                                                                                                                                                                                                                                                                                                                                                                                                                                                                                                                                                                                                                                                                                                                                                                                                                                                                                                                                                                                                                                                                                                                                                                                                                                                                                                                                                                                                                                                                                                                                                                                                                                                                                                                                                                                                                                                                                                                                                                                                                                                                                                                                                                                                                                                                  | 2.466727000  | -0.644876000 |              |              |   |              |              |             |   |              |              |             |   |              |              |              |   |             |              |              |   |              |              |              |   |              |              |              |   |             |              |             |   |              |              |              |   |              |             |              |   |             |             |              |   |              |             |              |   |              |             |              |   |              |              |              |   |              |              |              |   |              |              |              |   |              |              |              |   |              |              |              |   |              |              |              |   |             |              |             |   |             |              |              |   |              |             |              |   |              |             |             |   |             |              |             |   |             |              |             |   |             |             |             |   |             |              |             |   |             |              |             |   |             |             |             |   |             |             |             |   |             |             |              |   |             |             |             |   |             |             |             |   |              |             |              |   |              |             |              |   |             |             |              |   |             |             |              |   |              |             |              |   |              |              |             |   |              |              |             |   |              |              |             |
| H                                                                                                                                                             | -4.116683000                                                                                                                                                                                                                                                                                                                                                                                                                                                                                                                                                                                                                                                                                                                                                                                                                                                                                                                                                                                                                                                                                                                                                                                                                                                                                                                                                                                                                                                                                                                                                                                                                                                                                                                                                                                                                                                                                                                                                                                                                                                                                                                                                                                                                                                                                                                                                                                                                                                                                                                                                                                                                                                                                                                                                                                                                                                                                                                                                                                                                                                                                                                                                                                                                                                                                                                                                                                                                                                                                                                  | 0.176886000  | 0.240619000  |              |              |   |              |              |             |   |              |              |             |   |              |              |              |   |             |              |              |   |              |              |              |   |              |              |              |   |             |              |             |   |              |              |              |   |              |             |              |   |             |             |              |   |              |             |              |   |              |             |              |   |              |              |              |   |              |              |              |   |              |              |              |   |              |              |              |   |              |              |              |   |              |              |              |   |             |              |             |   |             |              |              |   |              |             |              |   |              |             |             |   |             |              |             |   |             |              |             |   |             |             |             |   |             |              |             |   |             |              |             |   |             |             |             |   |             |             |             |   |             |             |              |   |             |             |             |   |             |             |             |   |              |             |              |   |              |             |              |   |             |             |              |   |             |             |              |   |              |             |              |   |              |              |             |   |              |              |             |   |              |              |             |
| C                                                                                                                                                             | 3.726583000                                                                                                                                                                                                                                                                                                                                                                                                                                                                                                                                                                                                                                                                                                                                                                                                                                                                                                                                                                                                                                                                                                                                                                                                                                                                                                                                                                                                                                                                                                                                                                                                                                                                                                                                                                                                                                                                                                                                                                                                                                                                                                                                                                                                                                                                                                                                                                                                                                                                                                                                                                                                                                                                                                                                                                                                                                                                                                                                                                                                                                                                                                                                                                                                                                                                                                                                                                                                                                                                                                                   | -1.616431000 | 0.314717000  |              |              |   |              |              |             |   |              |              |             |   |              |              |              |   |             |              |              |   |              |              |              |   |              |              |              |   |             |              |             |   |              |              |              |   |              |             |              |   |             |             |              |   |              |             |              |   |              |             |              |   |              |              |              |   |              |              |              |   |              |              |              |   |              |              |              |   |              |              |              |   |              |              |              |   |             |              |             |   |             |              |              |   |              |             |              |   |              |             |             |   |             |              |             |   |             |              |             |   |             |             |             |   |             |              |             |   |             |              |             |   |             |             |             |   |             |             |             |   |             |             |              |   |             |             |             |   |             |             |             |   |              |             |              |   |              |             |              |   |             |             |              |   |             |             |              |   |              |             |              |   |              |              |             |   |              |              |             |   |              |              |             |
| C                                                                                                                                                             | 4.074755000                                                                                                                                                                                                                                                                                                                                                                                                                                                                                                                                                                                                                                                                                                                                                                                                                                                                                                                                                                                                                                                                                                                                                                                                                                                                                                                                                                                                                                                                                                                                                                                                                                                                                                                                                                                                                                                                                                                                                                                                                                                                                                                                                                                                                                                                                                                                                                                                                                                                                                                                                                                                                                                                                                                                                                                                                                                                                                                                                                                                                                                                                                                                                                                                                                                                                                                                                                                                                                                                                                                   | -0.295692000 | 0.366278000  |              |              |   |              |              |             |   |              |              |             |   |              |              |              |   |             |              |              |   |              |              |              |   |              |              |              |   |             |              |             |   |              |              |              |   |              |             |              |   |             |             |              |   |              |             |              |   |              |             |              |   |              |              |              |   |              |              |              |   |              |              |              |   |              |              |              |   |              |              |              |   |              |              |              |   |             |              |             |   |             |              |              |   |              |             |              |   |              |             |             |   |             |              |             |   |             |              |             |   |             |             |             |   |             |              |             |   |             |              |             |   |             |             |             |   |             |             |             |   |             |             |              |   |             |             |             |   |             |             |             |   |              |             |              |   |              |             |              |   |             |             |              |   |             |             |              |   |              |             |              |   |              |              |             |   |              |              |             |   |              |              |             |
| C                                                                                                                                                             | 3.094002000                                                                                                                                                                                                                                                                                                                                                                                                                                                                                                                                                                                                                                                                                                                                                                                                                                                                                                                                                                                                                                                                                                                                                                                                                                                                                                                                                                                                                                                                                                                                                                                                                                                                                                                                                                                                                                                                                                                                                                                                                                                                                                                                                                                                                                                                                                                                                                                                                                                                                                                                                                                                                                                                                                                                                                                                                                                                                                                                                                                                                                                                                                                                                                                                                                                                                                                                                                                                                                                                                                                   | 0.722964000  | 0.244112000  |              |              |   |              |              |             |   |              |              |             |   |              |              |              |   |             |              |              |   |              |              |              |   |              |              |              |   |             |              |             |   |              |              |              |   |              |             |              |   |             |             |              |   |              |             |              |   |              |             |              |   |              |              |              |   |              |              |              |   |              |              |              |   |              |              |              |   |              |              |              |   |              |              |              |   |             |              |             |   |             |              |              |   |              |             |              |   |              |             |             |   |             |              |             |   |             |              |             |   |             |             |             |   |             |              |             |   |             |              |             |   |             |             |             |   |             |             |             |   |             |             |              |   |             |             |             |   |             |             |             |   |              |             |              |   |              |             |              |   |             |             |              |   |             |             |              |   |              |             |              |   |              |              |             |   |              |              |             |   |              |              |             |
| H                                                                                                                                                             | 4.486490000                                                                                                                                                                                                                                                                                                                                                                                                                                                                                                                                                                                                                                                                                                                                                                                                                                                                                                                                                                                                                                                                                                                                                                                                                                                                                                                                                                                                                                                                                                                                                                                                                                                                                                                                                                                                                                                                                                                                                                                                                                                                                                                                                                                                                                                                                                                                                                                                                                                                                                                                                                                                                                                                                                                                                                                                                                                                                                                                                                                                                                                                                                                                                                                                                                                                                                                                                                                                                                                                                                                   | -2.385193000 | 0.409237000  |              |              |   |              |              |             |   |              |              |             |   |              |              |              |   |             |              |              |   |              |              |              |   |              |              |              |   |             |              |             |   |              |              |              |   |              |             |              |   |             |             |              |   |              |             |              |   |              |             |              |   |              |              |              |   |              |              |              |   |              |              |              |   |              |              |              |   |              |              |              |   |              |              |              |   |             |              |             |   |             |              |              |   |              |             |              |   |              |             |             |   |             |              |             |   |             |              |             |   |             |             |             |   |             |              |             |   |             |              |             |   |             |             |             |   |             |             |             |   |             |             |              |   |             |             |             |   |             |             |             |   |              |             |              |   |              |             |              |   |             |             |              |   |             |             |              |   |              |             |              |   |              |              |             |   |              |              |             |   |              |              |             |
| H                                                                                                                                                             | 5.112955000                                                                                                                                                                                                                                                                                                                                                                                                                                                                                                                                                                                                                                                                                                                                                                                                                                                                                                                                                                                                                                                                                                                                                                                                                                                                                                                                                                                                                                                                                                                                                                                                                                                                                                                                                                                                                                                                                                                                                                                                                                                                                                                                                                                                                                                                                                                                                                                                                                                                                                                                                                                                                                                                                                                                                                                                                                                                                                                                                                                                                                                                                                                                                                                                                                                                                                                                                                                                                                                                                                                   | -0.009145000 | 0.500103000  |              |              |   |              |              |             |   |              |              |             |   |              |              |              |   |             |              |              |   |              |              |              |   |              |              |              |   |             |              |             |   |              |              |              |   |              |             |              |   |             |             |              |   |              |             |              |   |              |             |              |   |              |              |              |   |              |              |              |   |              |              |              |   |              |              |              |   |              |              |              |   |              |              |              |   |             |              |             |   |             |              |              |   |              |             |              |   |              |             |             |   |             |              |             |   |             |              |             |   |             |             |             |   |             |              |             |   |             |              |             |   |             |             |             |   |             |             |             |   |             |             |              |   |             |             |             |   |             |             |             |   |              |             |              |   |              |             |              |   |             |             |              |   |             |             |              |   |              |             |              |   |              |              |             |   |              |              |             |   |              |              |             |
| C                                                                                                                                                             | 3.423956000                                                                                                                                                                                                                                                                                                                                                                                                                                                                                                                                                                                                                                                                                                                                                                                                                                                                                                                                                                                                                                                                                                                                                                                                                                                                                                                                                                                                                                                                                                                                                                                                                                                                                                                                                                                                                                                                                                                                                                                                                                                                                                                                                                                                                                                                                                                                                                                                                                                                                                                                                                                                                                                                                                                                                                                                                                                                                                                                                                                                                                                                                                                                                                                                                                                                                                                                                                                                                                                                                                                   | 2.095214000  | 0.292548000  |              |              |   |              |              |             |   |              |              |             |   |              |              |              |   |             |              |              |   |              |              |              |   |              |              |              |   |             |              |             |   |              |              |              |   |              |             |              |   |             |             |              |   |              |             |              |   |              |             |              |   |              |              |              |   |              |              |              |   |              |              |              |   |              |              |              |   |              |              |              |   |              |              |              |   |             |              |             |   |             |              |              |   |              |             |              |   |              |             |             |   |             |              |             |   |             |              |             |   |             |             |             |   |             |              |             |   |             |              |             |   |             |             |             |   |             |             |             |   |             |             |              |   |             |             |             |   |             |             |             |   |              |             |              |   |              |             |              |   |             |             |              |   |             |             |              |   |              |             |              |   |              |              |             |   |              |              |             |   |              |              |             |
| C                                                                                                                                                             | 2.464266000                                                                                                                                                                                                                                                                                                                                                                                                                                                                                                                                                                                                                                                                                                                                                                                                                                                                                                                                                                                                                                                                                                                                                                                                                                                                                                                                                                                                                                                                                                                                                                                                                                                                                                                                                                                                                                                                                                                                                                                                                                                                                                                                                                                                                                                                                                                                                                                                                                                                                                                                                                                                                                                                                                                                                                                                                                                                                                                                                                                                                                                                                                                                                                                                                                                                                                                                                                                                                                                                                                                   | 3.073665000  | 0.171214000  |              |              |   |              |              |             |   |              |              |             |   |              |              |              |   |             |              |              |   |              |              |              |   |              |              |              |   |             |              |             |   |              |              |              |   |              |             |              |   |             |             |              |   |              |             |              |   |              |             |              |   |              |              |              |   |              |              |              |   |              |              |              |   |              |              |              |   |              |              |              |   |              |              |              |   |             |              |             |   |             |              |              |   |              |             |              |   |              |             |             |   |             |              |             |   |             |              |             |   |             |             |             |   |             |              |             |   |             |              |             |   |             |             |             |   |             |             |             |   |             |             |              |   |             |             |             |   |             |             |             |   |              |             |              |   |              |             |              |   |             |             |              |   |             |             |              |   |              |             |              |   |              |              |             |   |              |              |             |   |              |              |             |
| C                                                                                                                                                             | 1.110283000                                                                                                                                                                                                                                                                                                                                                                                                                                                                                                                                                                                                                                                                                                                                                                                                                                                                                                                                                                                                                                                                                                                                                                                                                                                                                                                                                                                                                                                                                                                                                                                                                                                                                                                                                                                                                                                                                                                                                                                                                                                                                                                                                                                                                                                                                                                                                                                                                                                                                                                                                                                                                                                                                                                                                                                                                                                                                                                                                                                                                                                                                                                                                                                                                                                                                                                                                                                                                                                                                                                   | 2.738803000  | -0.005040000 |              |              |   |              |              |             |   |              |              |             |   |              |              |              |   |             |              |              |   |              |              |              |   |              |              |              |   |             |              |             |   |              |              |              |   |              |             |              |   |             |             |              |   |              |             |              |   |              |             |              |   |              |              |              |   |              |              |              |   |              |              |              |   |              |              |              |   |              |              |              |   |              |              |              |   |             |              |             |   |             |              |              |   |              |             |              |   |              |             |             |   |             |              |             |   |             |              |             |   |             |             |             |   |             |              |             |   |             |              |             |   |             |             |             |   |             |             |             |   |             |             |              |   |             |             |             |   |             |             |             |   |              |             |              |   |              |             |              |   |             |             |              |   |             |             |              |   |              |             |              |   |              |              |             |   |              |              |             |   |              |              |             |
| H                                                                                                                                                             | 4.464086000                                                                                                                                                                                                                                                                                                                                                                                                                                                                                                                                                                                                                                                                                                                                                                                                                                                                                                                                                                                                                                                                                                                                                                                                                                                                                                                                                                                                                                                                                                                                                                                                                                                                                                                                                                                                                                                                                                                                                                                                                                                                                                                                                                                                                                                                                                                                                                                                                                                                                                                                                                                                                                                                                                                                                                                                                                                                                                                                                                                                                                                                                                                                                                                                                                                                                                                                                                                                                                                                                                                   | 2.377016000  | 0.426682000  |              |              |   |              |              |             |   |              |              |             |   |              |              |              |   |             |              |              |   |              |              |              |   |              |              |              |   |             |              |             |   |              |              |              |   |              |             |              |   |             |             |              |   |              |             |              |   |              |             |              |   |              |              |              |   |              |              |              |   |              |              |              |   |              |              |              |   |              |              |              |   |              |              |              |   |             |              |             |   |             |              |              |   |              |             |              |   |              |             |             |   |             |              |             |   |             |              |             |   |             |             |             |   |             |              |             |   |             |              |             |   |             |             |             |   |             |             |             |   |             |             |              |   |             |             |             |   |             |             |             |   |              |             |              |   |              |             |              |   |             |             |              |   |             |             |              |   |              |             |              |   |              |              |             |   |              |              |             |   |              |              |             |
| H                                                                                                                                                             | 2.747471000                                                                                                                                                                                                                                                                                                                                                                                                                                                                                                                                                                                                                                                                                                                                                                                                                                                                                                                                                                                                                                                                                                                                                                                                                                                                                                                                                                                                                                                                                                                                                                                                                                                                                                                                                                                                                                                                                                                                                                                                                                                                                                                                                                                                                                                                                                                                                                                                                                                                                                                                                                                                                                                                                                                                                                                                                                                                                                                                                                                                                                                                                                                                                                                                                                                                                                                                                                                                                                                                                                                   | 4.120068000  | 0.211793000  |              |              |   |              |              |             |   |              |              |             |   |              |              |              |   |             |              |              |   |              |              |              |   |              |              |              |   |             |              |             |   |              |              |              |   |              |             |              |   |             |             |              |   |              |             |              |   |              |             |              |   |              |              |              |   |              |              |              |   |              |              |              |   |              |              |              |   |              |              |              |   |              |              |              |   |             |              |             |   |             |              |              |   |              |             |              |   |              |             |             |   |             |              |             |   |             |              |             |   |             |             |             |   |             |              |             |   |             |              |             |   |             |             |             |   |             |             |             |   |             |             |              |   |             |             |             |   |             |             |             |   |              |             |              |   |              |             |              |   |             |             |              |   |             |             |              |   |              |             |              |   |              |              |             |   |              |              |             |   |              |              |             |
| C                                                                                                                                                             | -1.196364000                                                                                                                                                                                                                                                                                                                                                                                                                                                                                                                                                                                                                                                                                                                                                                                                                                                                                                                                                                                                                                                                                                                                                                                                                                                                                                                                                                                                                                                                                                                                                                                                                                                                                                                                                                                                                                                                                                                                                                                                                                                                                                                                                                                                                                                                                                                                                                                                                                                                                                                                                                                                                                                                                                                                                                                                                                                                                                                                                                                                                                                                                                                                                                                                                                                                                                                                                                                                                                                                                                                  | 3.416383000  | -0.307108000 |              |              |   |              |              |             |   |              |              |             |   |              |              |              |   |             |              |              |   |              |              |              |   |              |              |              |   |             |              |             |   |              |              |              |   |              |             |              |   |             |             |              |   |              |             |              |   |              |             |              |   |              |              |              |   |              |              |              |   |              |              |              |   |              |              |              |   |              |              |              |   |              |              |              |   |             |              |             |   |             |              |              |   |              |             |              |   |              |             |             |   |             |              |             |   |             |              |             |   |             |             |             |   |             |              |             |   |             |              |             |   |             |             |             |   |             |             |             |   |             |             |              |   |             |             |             |   |             |             |             |   |              |             |              |   |              |             |              |   |             |             |              |   |             |             |              |   |              |             |              |   |              |              |             |   |              |              |             |   |              |              |             |
| H                                                                                                                                                             | -1.957081000                                                                                                                                                                                                                                                                                                                                                                                                                                                                                                                                                                                                                                                                                                                                                                                                                                                                                                                                                                                                                                                                                                                                                                                                                                                                                                                                                                                                                                                                                                                                                                                                                                                                                                                                                                                                                                                                                                                                                                                                                                                                                                                                                                                                                                                                                                                                                                                                                                                                                                                                                                                                                                                                                                                                                                                                                                                                                                                                                                                                                                                                                                                                                                                                                                                                                                                                                                                                                                                                                                                  | 4.183544000  | -0.407345000 |              |              |   |              |              |             |   |              |              |             |   |              |              |              |   |             |              |              |   |              |              |              |   |              |              |              |   |             |              |             |   |              |              |              |   |              |             |              |   |             |             |              |   |              |             |              |   |              |             |              |   |              |              |              |   |              |              |              |   |              |              |              |   |              |              |              |   |              |              |              |   |              |              |              |   |             |              |             |   |             |              |              |   |              |             |              |   |              |             |             |   |             |              |             |   |             |              |             |   |             |             |             |   |             |              |             |   |             |              |             |   |             |             |             |   |             |             |             |   |             |             |              |   |             |             |             |   |             |             |             |   |              |             |              |   |              |             |              |   |             |             |              |   |             |             |              |   |              |             |              |   |              |              |             |   |              |              |             |   |              |              |             |
| C                                                                                                                                                             | 0.104871000                                                                                                                                                                                                                                                                                                                                                                                                                                                                                                                                                                                                                                                                                                                                                                                                                                                                                                                                                                                                                                                                                                                                                                                                                                                                                                                                                                                                                                                                                                                                                                                                                                                                                                                                                                                                                                                                                                                                                                                                                                                                                                                                                                                                                                                                                                                                                                                                                                                                                                                                                                                                                                                                                                                                                                                                                                                                                                                                                                                                                                                                                                                                                                                                                                                                                                                                                                                                                                                                                                                   | 3.747710000  | -0.136429000 |              |              |   |              |              |             |   |              |              |             |   |              |              |              |   |             |              |              |   |              |              |              |   |              |              |              |   |             |              |             |   |              |              |              |   |              |             |              |   |             |             |              |   |              |             |              |   |              |             |              |   |              |              |              |   |              |              |              |   |              |              |              |   |              |              |              |   |              |              |              |   |              |              |              |   |             |              |             |   |             |              |              |   |              |             |              |   |              |             |             |   |             |              |             |   |             |              |             |   |             |             |             |   |             |              |             |   |             |              |             |   |             |             |             |   |             |             |             |   |             |             |              |   |             |             |             |   |             |             |             |   |              |             |              |   |              |             |              |   |             |             |              |   |             |             |              |   |              |             |              |   |              |              |             |   |              |              |             |   |              |              |             |
| H                                                                                                                                                             | 0.408157000                                                                                                                                                                                                                                                                                                                                                                                                                                                                                                                                                                                                                                                                                                                                                                                                                                                                                                                                                                                                                                                                                                                                                                                                                                                                                                                                                                                                                                                                                                                                                                                                                                                                                                                                                                                                                                                                                                                                                                                                                                                                                                                                                                                                                                                                                                                                                                                                                                                                                                                                                                                                                                                                                                                                                                                                                                                                                                                                                                                                                                                                                                                                                                                                                                                                                                                                                                                                                                                                                                                   | 4.788535000  | -0.095099000 |              |              |   |              |              |             |   |              |              |             |   |              |              |              |   |             |              |              |   |              |              |              |   |              |              |              |   |             |              |             |   |              |              |              |   |              |             |              |   |             |             |              |   |              |             |              |   |              |             |              |   |              |              |              |   |              |              |              |   |              |              |              |   |              |              |              |   |              |              |              |   |              |              |              |   |             |              |             |   |             |              |              |   |              |             |              |   |              |             |             |   |             |              |             |   |             |              |             |   |             |             |             |   |             |              |             |   |             |              |             |   |             |             |             |   |             |             |             |   |             |             |              |   |             |             |             |   |             |             |             |   |              |             |              |   |              |             |              |   |             |             |              |   |             |             |              |   |              |             |              |   |              |              |             |   |              |              |             |   |              |              |             |
| H                                                                                                                                                             | -3.985640000                                                                                                                                                                                                                                                                                                                                                                                                                                                                                                                                                                                                                                                                                                                                                                                                                                                                                                                                                                                                                                                                                                                                                                                                                                                                                                                                                                                                                                                                                                                                                                                                                                                                                                                                                                                                                                                                                                                                                                                                                                                                                                                                                                                                                                                                                                                                                                                                                                                                                                                                                                                                                                                                                                                                                                                                                                                                                                                                                                                                                                                                                                                                                                                                                                                                                                                                                                                                                                                                                                                  | 0.143372000  | -1.472618000 |              |              |   |              |              |             |   |              |              |             |   |              |              |              |   |             |              |              |   |              |              |              |   |              |              |              |   |             |              |             |   |              |              |              |   |              |             |              |   |             |             |              |   |              |             |              |   |              |             |              |   |              |              |              |   |              |              |              |   |              |              |              |   |              |              |              |   |              |              |              |   |              |              |              |   |             |              |             |   |             |              |              |   |              |             |              |   |              |             |             |   |             |              |             |   |             |              |             |   |             |             |             |   |             |              |             |   |             |              |             |   |             |             |             |   |             |             |             |   |             |             |              |   |             |             |             |   |             |             |             |   |              |             |              |   |              |             |              |   |             |             |              |   |             |             |              |   |              |             |              |   |              |              |             |   |              |              |             |   |              |              |             |
| O                                                                                                                                                             | -5.561923000                                                                                                                                                                                                                                                                                                                                                                                                                                                                                                                                                                                                                                                                                                                                                                                                                                                                                                                                                                                                                                                                                                                                                                                                                                                                                                                                                                                                                                                                                                                                                                                                                                                                                                                                                                                                                                                                                                                                                                                                                                                                                                                                                                                                                                                                                                                                                                                                                                                                                                                                                                                                                                                                                                                                                                                                                                                                                                                                                                                                                                                                                                                                                                                                                                                                                                                                                                                                                                                                                                                  | -0.089512000 | 1.672231000  |              |              |   |              |              |             |   |              |              |             |   |              |              |              |   |             |              |              |   |              |              |              |   |              |              |              |   |             |              |             |   |              |              |              |   |              |             |              |   |             |             |              |   |              |             |              |   |              |             |              |   |              |              |              |   |              |              |              |   |              |              |              |   |              |              |              |   |              |              |              |   |              |              |              |   |             |              |             |   |             |              |              |   |              |             |              |   |              |             |             |   |             |              |             |   |             |              |             |   |             |             |             |   |             |              |             |   |             |              |             |   |             |             |             |   |             |             |             |   |             |             |              |   |             |             |             |   |             |             |             |   |              |             |              |   |              |             |              |   |             |             |              |   |             |             |              |   |              |             |              |   |              |              |             |   |              |              |             |   |              |              |             |
| H                                                                                                                                                             | -6.515486000                                                                                                                                                                                                                                                                                                                                                                                                                                                                                                                                                                                                                                                                                                                                                                                                                                                                                                                                                                                                                                                                                                                                                                                                                                                                                                                                                                                                                                                                                                                                                                                                                                                                                                                                                                                                                                                                                                                                                                                                                                                                                                                                                                                                                                                                                                                                                                                                                                                                                                                                                                                                                                                                                                                                                                                                                                                                                                                                                                                                                                                                                                                                                                                                                                                                                                                                                                                                                                                                                                                  | -0.055935000 | 1.565144000  |              |              |   |              |              |             |   |              |              |             |   |              |              |              |   |             |              |              |   |              |              |              |   |              |              |              |   |             |              |             |   |              |              |              |   |              |             |              |   |             |             |              |   |              |             |              |   |              |             |              |   |              |              |              |   |              |              |              |   |              |              |              |   |              |              |              |   |              |              |              |   |              |              |              |   |             |              |             |   |             |              |              |   |              |             |              |   |              |             |             |   |             |              |             |   |             |              |             |   |             |             |             |   |             |              |             |   |             |              |             |   |             |             |             |   |             |             |             |   |             |             |              |   |             |             |             |   |             |             |             |   |              |             |              |   |              |             |              |   |             |             |              |   |             |             |              |   |              |             |              |   |              |              |             |   |              |              |             |   |              |              |             |
| H                                                                                                                                                             | -5.418688000                                                                                                                                                                                                                                                                                                                                                                                                                                                                                                                                                                                                                                                                                                                                                                                                                                                                                                                                                                                                                                                                                                                                                                                                                                                                                                                                                                                                                                                                                                                                                                                                                                                                                                                                                                                                                                                                                                                                                                                                                                                                                                                                                                                                                                                                                                                                                                                                                                                                                                                                                                                                                                                                                                                                                                                                                                                                                                                                                                                                                                                                                                                                                                                                                                                                                                                                                                                                                                                                                                                  | -0.271231000 | 2.604010000  |              |              |   |              |              |             |   |              |              |             |   |              |              |              |   |             |              |              |   |              |              |              |   |              |              |              |   |             |              |             |   |              |              |              |   |              |             |              |   |             |             |              |   |              |             |              |   |              |             |              |   |              |              |              |   |              |              |              |   |              |              |              |   |              |              |              |   |              |              |              |   |              |              |              |   |             |              |             |   |             |              |              |   |              |             |              |   |              |             |             |   |             |              |             |   |             |              |             |   |             |             |             |   |             |              |             |   |             |              |             |   |             |             |             |   |             |             |             |   |             |             |              |   |             |             |             |   |             |             |             |   |              |             |              |   |              |             |              |   |             |             |              |   |             |             |              |   |              |             |              |   |              |              |             |   |              |              |             |   |              |              |             |
|  <p style="text-align: center;"><b>CorH<sup>+</sup>-W<sub>43</sub></b></p> | <table border="1"> <tbody> <tr><td>C</td><td>-2.254937000</td><td>-3.389836000</td><td>0.004872000</td></tr> <tr><td>C</td><td>-2.661030000</td><td>-2.029089000</td><td>0.003205000</td></tr> <tr><td>C</td><td>-1.668342000</td><td>-1.018815000</td><td>0.007626000</td></tr> <tr><td>C</td><td>-0.296155000</td><td>-1.371302000</td><td>-0.004021000</td></tr> <tr><td>C</td><td>0.081505000</td><td>-2.732853000</td><td>0.002105000</td></tr> <tr><td>C</td><td>-0.932956000</td><td>-3.729893000</td><td>0.003577000</td></tr> <tr><td>C</td><td>-2.046060000</td><td>0.344454000</td><td>-0.005674000</td></tr> <tr><td>C</td><td>0.702155000</td><td>-0.360636000</td><td>0.003788000</td></tr> <tr><td>C</td><td>0.316507000</td><td>1.010718000</td><td>-0.006070000</td></tr> <tr><td>C</td><td>-1.050344000</td><td>1.360822000</td><td>0.003644000</td></tr> <tr><td>C</td><td>1.308346000</td><td>2.057622000</td><td>-0.003823000</td></tr> <tr><td>C</td><td>2.634215000</td><td>1.714602000</td><td>-0.004642000</td></tr> <tr><td>C</td><td>3.102096000</td><td>0.337339000</td><td>-0.002067000</td></tr> <tr><td>C</td><td>2.065766000</td><td>-0.718328000</td><td>-0.001753000</td></tr> <tr><td>C</td><td>2.420829000</td><td>-2.071569000</td><td>-0.001773000</td></tr> </tbody> </table>                                                                                                                                                                                                                                                                                                                                                                                                                                                                                                                                                                                                                                                                                                                                                                                                                                                                                                                                                                                                                                                                                                                                                                                                                                                                                                                                                                                                                                                                                                                                                                                                                                                                                                                                                                                                                                                                                                                                                                                                                                                                                                                                                                                                          | C            | -2.254937000 | -3.389836000 | 0.004872000  | C | -2.661030000 | -2.029089000 | 0.003205000 | C | -1.668342000 | -1.018815000 | 0.007626000 | C | -0.296155000 | -1.371302000 | -0.004021000 | C | 0.081505000 | -2.732853000 | 0.002105000  | C | -0.932956000 | -3.729893000 | 0.003577000  | C | -2.046060000 | 0.344454000  | -0.005674000 | C | 0.702155000 | -0.360636000 | 0.003788000 | C | 0.316507000  | 1.010718000  | -0.006070000 | C | -1.050344000 | 1.360822000 | 0.003644000  | C | 1.308346000 | 2.057622000 | -0.003823000 | C | 2.634215000  | 1.714602000 | -0.004642000 | C | 3.102096000  | 0.337339000 | -0.002067000 | C | 2.065766000  | -0.718328000 | -0.001753000 | C | 2.420829000  | -2.071569000 | -0.001773000 |   |              |              |              |   |              |              |              |   |              |              |              |   |              |              |              |   |             |              |             |   |             |              |              |   |              |             |              |   |              |             |             |   |             |              |             |   |             |              |             |   |             |             |             |   |             |              |             |   |             |              |             |   |             |             |             |   |             |             |             |   |             |             |              |   |             |             |             |   |             |             |             |   |              |             |              |   |              |             |              |   |             |             |              |   |             |             |              |   |              |             |              |   |              |              |             |   |              |              |             |   |              |              |             |
| C                                                                                                                                                             | -2.254937000                                                                                                                                                                                                                                                                                                                                                                                                                                                                                                                                                                                                                                                                                                                                                                                                                                                                                                                                                                                                                                                                                                                                                                                                                                                                                                                                                                                                                                                                                                                                                                                                                                                                                                                                                                                                                                                                                                                                                                                                                                                                                                                                                                                                                                                                                                                                                                                                                                                                                                                                                                                                                                                                                                                                                                                                                                                                                                                                                                                                                                                                                                                                                                                                                                                                                                                                                                                                                                                                                                                  | -3.389836000 | 0.004872000  |              |              |   |              |              |             |   |              |              |             |   |              |              |              |   |             |              |              |   |              |              |              |   |              |              |              |   |             |              |             |   |              |              |              |   |              |             |              |   |             |             |              |   |              |             |              |   |              |             |              |   |              |              |              |   |              |              |              |   |              |              |              |   |              |              |              |   |              |              |              |   |              |              |              |   |             |              |             |   |             |              |              |   |              |             |              |   |              |             |             |   |             |              |             |   |             |              |             |   |             |             |             |   |             |              |             |   |             |              |             |   |             |             |             |   |             |             |             |   |             |             |              |   |             |             |             |   |             |             |             |   |              |             |              |   |              |             |              |   |             |             |              |   |             |             |              |   |              |             |              |   |              |              |             |   |              |              |             |   |              |              |             |
| C                                                                                                                                                             | -2.661030000                                                                                                                                                                                                                                                                                                                                                                                                                                                                                                                                                                                                                                                                                                                                                                                                                                                                                                                                                                                                                                                                                                                                                                                                                                                                                                                                                                                                                                                                                                                                                                                                                                                                                                                                                                                                                                                                                                                                                                                                                                                                                                                                                                                                                                                                                                                                                                                                                                                                                                                                                                                                                                                                                                                                                                                                                                                                                                                                                                                                                                                                                                                                                                                                                                                                                                                                                                                                                                                                                                                  | -2.029089000 | 0.003205000  |              |              |   |              |              |             |   |              |              |             |   |              |              |              |   |             |              |              |   |              |              |              |   |              |              |              |   |             |              |             |   |              |              |              |   |              |             |              |   |             |             |              |   |              |             |              |   |              |             |              |   |              |              |              |   |              |              |              |   |              |              |              |   |              |              |              |   |              |              |              |   |              |              |              |   |             |              |             |   |             |              |              |   |              |             |              |   |              |             |             |   |             |              |             |   |             |              |             |   |             |             |             |   |             |              |             |   |             |              |             |   |             |             |             |   |             |             |             |   |             |             |              |   |             |             |             |   |             |             |             |   |              |             |              |   |              |             |              |   |             |             |              |   |             |             |              |   |              |             |              |   |              |              |             |   |              |              |             |   |              |              |             |
| C                                                                                                                                                             | -1.668342000                                                                                                                                                                                                                                                                                                                                                                                                                                                                                                                                                                                                                                                                                                                                                                                                                                                                                                                                                                                                                                                                                                                                                                                                                                                                                                                                                                                                                                                                                                                                                                                                                                                                                                                                                                                                                                                                                                                                                                                                                                                                                                                                                                                                                                                                                                                                                                                                                                                                                                                                                                                                                                                                                                                                                                                                                                                                                                                                                                                                                                                                                                                                                                                                                                                                                                                                                                                                                                                                                                                  | -1.018815000 | 0.007626000  |              |              |   |              |              |             |   |              |              |             |   |              |              |              |   |             |              |              |   |              |              |              |   |              |              |              |   |             |              |             |   |              |              |              |   |              |             |              |   |             |             |              |   |              |             |              |   |              |             |              |   |              |              |              |   |              |              |              |   |              |              |              |   |              |              |              |   |              |              |              |   |              |              |              |   |             |              |             |   |             |              |              |   |              |             |              |   |              |             |             |   |             |              |             |   |             |              |             |   |             |             |             |   |             |              |             |   |             |              |             |   |             |             |             |   |             |             |             |   |             |             |              |   |             |             |             |   |             |             |             |   |              |             |              |   |              |             |              |   |             |             |              |   |             |             |              |   |              |             |              |   |              |              |             |   |              |              |             |   |              |              |             |
| C                                                                                                                                                             | -0.296155000                                                                                                                                                                                                                                                                                                                                                                                                                                                                                                                                                                                                                                                                                                                                                                                                                                                                                                                                                                                                                                                                                                                                                                                                                                                                                                                                                                                                                                                                                                                                                                                                                                                                                                                                                                                                                                                                                                                                                                                                                                                                                                                                                                                                                                                                                                                                                                                                                                                                                                                                                                                                                                                                                                                                                                                                                                                                                                                                                                                                                                                                                                                                                                                                                                                                                                                                                                                                                                                                                                                  | -1.371302000 | -0.004021000 |              |              |   |              |              |             |   |              |              |             |   |              |              |              |   |             |              |              |   |              |              |              |   |              |              |              |   |             |              |             |   |              |              |              |   |              |             |              |   |             |             |              |   |              |             |              |   |              |             |              |   |              |              |              |   |              |              |              |   |              |              |              |   |              |              |              |   |              |              |              |   |              |              |              |   |             |              |             |   |             |              |              |   |              |             |              |   |              |             |             |   |             |              |             |   |             |              |             |   |             |             |             |   |             |              |             |   |             |              |             |   |             |             |             |   |             |             |             |   |             |             |              |   |             |             |             |   |             |             |             |   |              |             |              |   |              |             |              |   |             |             |              |   |             |             |              |   |              |             |              |   |              |              |             |   |              |              |             |   |              |              |             |
| C                                                                                                                                                             | 0.081505000                                                                                                                                                                                                                                                                                                                                                                                                                                                                                                                                                                                                                                                                                                                                                                                                                                                                                                                                                                                                                                                                                                                                                                                                                                                                                                                                                                                                                                                                                                                                                                                                                                                                                                                                                                                                                                                                                                                                                                                                                                                                                                                                                                                                                                                                                                                                                                                                                                                                                                                                                                                                                                                                                                                                                                                                                                                                                                                                                                                                                                                                                                                                                                                                                                                                                                                                                                                                                                                                                                                   | -2.732853000 | 0.002105000  |              |              |   |              |              |             |   |              |              |             |   |              |              |              |   |             |              |              |   |              |              |              |   |              |              |              |   |             |              |             |   |              |              |              |   |              |             |              |   |             |             |              |   |              |             |              |   |              |             |              |   |              |              |              |   |              |              |              |   |              |              |              |   |              |              |              |   |              |              |              |   |              |              |              |   |             |              |             |   |             |              |              |   |              |             |              |   |              |             |             |   |             |              |             |   |             |              |             |   |             |             |             |   |             |              |             |   |             |              |             |   |             |             |             |   |             |             |             |   |             |             |              |   |             |             |             |   |             |             |             |   |              |             |              |   |              |             |              |   |             |             |              |   |             |             |              |   |              |             |              |   |              |              |             |   |              |              |             |   |              |              |             |
| C                                                                                                                                                             | -0.932956000                                                                                                                                                                                                                                                                                                                                                                                                                                                                                                                                                                                                                                                                                                                                                                                                                                                                                                                                                                                                                                                                                                                                                                                                                                                                                                                                                                                                                                                                                                                                                                                                                                                                                                                                                                                                                                                                                                                                                                                                                                                                                                                                                                                                                                                                                                                                                                                                                                                                                                                                                                                                                                                                                                                                                                                                                                                                                                                                                                                                                                                                                                                                                                                                                                                                                                                                                                                                                                                                                                                  | -3.729893000 | 0.003577000  |              |              |   |              |              |             |   |              |              |             |   |              |              |              |   |             |              |              |   |              |              |              |   |              |              |              |   |             |              |             |   |              |              |              |   |              |             |              |   |             |             |              |   |              |             |              |   |              |             |              |   |              |              |              |   |              |              |              |   |              |              |              |   |              |              |              |   |              |              |              |   |              |              |              |   |             |              |             |   |             |              |              |   |              |             |              |   |              |             |             |   |             |              |             |   |             |              |             |   |             |             |             |   |             |              |             |   |             |              |             |   |             |             |             |   |             |             |             |   |             |             |              |   |             |             |             |   |             |             |             |   |              |             |              |   |              |             |              |   |             |             |              |   |             |             |              |   |              |             |              |   |              |              |             |   |              |              |             |   |              |              |             |
| C                                                                                                                                                             | -2.046060000                                                                                                                                                                                                                                                                                                                                                                                                                                                                                                                                                                                                                                                                                                                                                                                                                                                                                                                                                                                                                                                                                                                                                                                                                                                                                                                                                                                                                                                                                                                                                                                                                                                                                                                                                                                                                                                                                                                                                                                                                                                                                                                                                                                                                                                                                                                                                                                                                                                                                                                                                                                                                                                                                                                                                                                                                                                                                                                                                                                                                                                                                                                                                                                                                                                                                                                                                                                                                                                                                                                  | 0.344454000  | -0.005674000 |              |              |   |              |              |             |   |              |              |             |   |              |              |              |   |             |              |              |   |              |              |              |   |              |              |              |   |             |              |             |   |              |              |              |   |              |             |              |   |             |             |              |   |              |             |              |   |              |             |              |   |              |              |              |   |              |              |              |   |              |              |              |   |              |              |              |   |              |              |              |   |              |              |              |   |             |              |             |   |             |              |              |   |              |             |              |   |              |             |             |   |             |              |             |   |             |              |             |   |             |             |             |   |             |              |             |   |             |              |             |   |             |             |             |   |             |             |             |   |             |             |              |   |             |             |             |   |             |             |             |   |              |             |              |   |              |             |              |   |             |             |              |   |             |             |              |   |              |             |              |   |              |              |             |   |              |              |             |   |              |              |             |
| C                                                                                                                                                             | 0.702155000                                                                                                                                                                                                                                                                                                                                                                                                                                                                                                                                                                                                                                                                                                                                                                                                                                                                                                                                                                                                                                                                                                                                                                                                                                                                                                                                                                                                                                                                                                                                                                                                                                                                                                                                                                                                                                                                                                                                                                                                                                                                                                                                                                                                                                                                                                                                                                                                                                                                                                                                                                                                                                                                                                                                                                                                                                                                                                                                                                                                                                                                                                                                                                                                                                                                                                                                                                                                                                                                                                                   | -0.360636000 | 0.003788000  |              |              |   |              |              |             |   |              |              |             |   |              |              |              |   |             |              |              |   |              |              |              |   |              |              |              |   |             |              |             |   |              |              |              |   |              |             |              |   |             |             |              |   |              |             |              |   |              |             |              |   |              |              |              |   |              |              |              |   |              |              |              |   |              |              |              |   |              |              |              |   |              |              |              |   |             |              |             |   |             |              |              |   |              |             |              |   |              |             |             |   |             |              |             |   |             |              |             |   |             |             |             |   |             |              |             |   |             |              |             |   |             |             |             |   |             |             |             |   |             |             |              |   |             |             |             |   |             |             |             |   |              |             |              |   |              |             |              |   |             |             |              |   |             |             |              |   |              |             |              |   |              |              |             |   |              |              |             |   |              |              |             |
| C                                                                                                                                                             | 0.316507000                                                                                                                                                                                                                                                                                                                                                                                                                                                                                                                                                                                                                                                                                                                                                                                                                                                                                                                                                                                                                                                                                                                                                                                                                                                                                                                                                                                                                                                                                                                                                                                                                                                                                                                                                                                                                                                                                                                                                                                                                                                                                                                                                                                                                                                                                                                                                                                                                                                                                                                                                                                                                                                                                                                                                                                                                                                                                                                                                                                                                                                                                                                                                                                                                                                                                                                                                                                                                                                                                                                   | 1.010718000  | -0.006070000 |              |              |   |              |              |             |   |              |              |             |   |              |              |              |   |             |              |              |   |              |              |              |   |              |              |              |   |             |              |             |   |              |              |              |   |              |             |              |   |             |             |              |   |              |             |              |   |              |             |              |   |              |              |              |   |              |              |              |   |              |              |              |   |              |              |              |   |              |              |              |   |              |              |              |   |             |              |             |   |             |              |              |   |              |             |              |   |              |             |             |   |             |              |             |   |             |              |             |   |             |             |             |   |             |              |             |   |             |              |             |   |             |             |             |   |             |             |             |   |             |             |              |   |             |             |             |   |             |             |             |   |              |             |              |   |              |             |              |   |             |             |              |   |             |             |              |   |              |             |              |   |              |              |             |   |              |              |             |   |              |              |             |
| C                                                                                                                                                             | -1.050344000                                                                                                                                                                                                                                                                                                                                                                                                                                                                                                                                                                                                                                                                                                                                                                                                                                                                                                                                                                                                                                                                                                                                                                                                                                                                                                                                                                                                                                                                                                                                                                                                                                                                                                                                                                                                                                                                                                                                                                                                                                                                                                                                                                                                                                                                                                                                                                                                                                                                                                                                                                                                                                                                                                                                                                                                                                                                                                                                                                                                                                                                                                                                                                                                                                                                                                                                                                                                                                                                                                                  | 1.360822000  | 0.003644000  |              |              |   |              |              |             |   |              |              |             |   |              |              |              |   |             |              |              |   |              |              |              |   |              |              |              |   |             |              |             |   |              |              |              |   |              |             |              |   |             |             |              |   |              |             |              |   |              |             |              |   |              |              |              |   |              |              |              |   |              |              |              |   |              |              |              |   |              |              |              |   |              |              |              |   |             |              |             |   |             |              |              |   |              |             |              |   |              |             |             |   |             |              |             |   |             |              |             |   |             |             |             |   |             |              |             |   |             |              |             |   |             |             |             |   |             |             |             |   |             |             |              |   |             |             |             |   |             |             |             |   |              |             |              |   |              |             |              |   |             |             |              |   |             |             |              |   |              |             |              |   |              |              |             |   |              |              |             |   |              |              |             |
| C                                                                                                                                                             | 1.308346000                                                                                                                                                                                                                                                                                                                                                                                                                                                                                                                                                                                                                                                                                                                                                                                                                                                                                                                                                                                                                                                                                                                                                                                                                                                                                                                                                                                                                                                                                                                                                                                                                                                                                                                                                                                                                                                                                                                                                                                                                                                                                                                                                                                                                                                                                                                                                                                                                                                                                                                                                                                                                                                                                                                                                                                                                                                                                                                                                                                                                                                                                                                                                                                                                                                                                                                                                                                                                                                                                                                   | 2.057622000  | -0.003823000 |              |              |   |              |              |             |   |              |              |             |   |              |              |              |   |             |              |              |   |              |              |              |   |              |              |              |   |             |              |             |   |              |              |              |   |              |             |              |   |             |             |              |   |              |             |              |   |              |             |              |   |              |              |              |   |              |              |              |   |              |              |              |   |              |              |              |   |              |              |              |   |              |              |              |   |             |              |             |   |             |              |              |   |              |             |              |   |              |             |             |   |             |              |             |   |             |              |             |   |             |             |             |   |             |              |             |   |             |              |             |   |             |             |             |   |             |             |             |   |             |             |              |   |             |             |             |   |             |             |             |   |              |             |              |   |              |             |              |   |             |             |              |   |             |             |              |   |              |             |              |   |              |              |             |   |              |              |             |   |              |              |             |
| C                                                                                                                                                             | 2.634215000                                                                                                                                                                                                                                                                                                                                                                                                                                                                                                                                                                                                                                                                                                                                                                                                                                                                                                                                                                                                                                                                                                                                                                                                                                                                                                                                                                                                                                                                                                                                                                                                                                                                                                                                                                                                                                                                                                                                                                                                                                                                                                                                                                                                                                                                                                                                                                                                                                                                                                                                                                                                                                                                                                                                                                                                                                                                                                                                                                                                                                                                                                                                                                                                                                                                                                                                                                                                                                                                                                                   | 1.714602000  | -0.004642000 |              |              |   |              |              |             |   |              |              |             |   |              |              |              |   |             |              |              |   |              |              |              |   |              |              |              |   |             |              |             |   |              |              |              |   |              |             |              |   |             |             |              |   |              |             |              |   |              |             |              |   |              |              |              |   |              |              |              |   |              |              |              |   |              |              |              |   |              |              |              |   |              |              |              |   |             |              |             |   |             |              |              |   |              |             |              |   |              |             |             |   |             |              |             |   |             |              |             |   |             |             |             |   |             |              |             |   |             |              |             |   |             |             |             |   |             |             |             |   |             |             |              |   |             |             |             |   |             |             |             |   |              |             |              |   |              |             |              |   |             |             |              |   |             |             |              |   |              |             |              |   |              |              |             |   |              |              |             |   |              |              |             |
| C                                                                                                                                                             | 3.102096000                                                                                                                                                                                                                                                                                                                                                                                                                                                                                                                                                                                                                                                                                                                                                                                                                                                                                                                                                                                                                                                                                                                                                                                                                                                                                                                                                                                                                                                                                                                                                                                                                                                                                                                                                                                                                                                                                                                                                                                                                                                                                                                                                                                                                                                                                                                                                                                                                                                                                                                                                                                                                                                                                                                                                                                                                                                                                                                                                                                                                                                                                                                                                                                                                                                                                                                                                                                                                                                                                                                   | 0.337339000  | -0.002067000 |              |              |   |              |              |             |   |              |              |             |   |              |              |              |   |             |              |              |   |              |              |              |   |              |              |              |   |             |              |             |   |              |              |              |   |              |             |              |   |             |             |              |   |              |             |              |   |              |             |              |   |              |              |              |   |              |              |              |   |              |              |              |   |              |              |              |   |              |              |              |   |              |              |              |   |             |              |             |   |             |              |              |   |              |             |              |   |              |             |             |   |             |              |             |   |             |              |             |   |             |             |             |   |             |              |             |   |             |              |             |   |             |             |             |   |             |             |             |   |             |             |              |   |             |             |             |   |             |             |             |   |              |             |              |   |              |             |              |   |             |             |              |   |             |             |              |   |              |             |              |   |              |              |             |   |              |              |             |   |              |              |             |
| C                                                                                                                                                             | 2.065766000                                                                                                                                                                                                                                                                                                                                                                                                                                                                                                                                                                                                                                                                                                                                                                                                                                                                                                                                                                                                                                                                                                                                                                                                                                                                                                                                                                                                                                                                                                                                                                                                                                                                                                                                                                                                                                                                                                                                                                                                                                                                                                                                                                                                                                                                                                                                                                                                                                                                                                                                                                                                                                                                                                                                                                                                                                                                                                                                                                                                                                                                                                                                                                                                                                                                                                                                                                                                                                                                                                                   | -0.718328000 | -0.001753000 |              |              |   |              |              |             |   |              |              |             |   |              |              |              |   |             |              |              |   |              |              |              |   |              |              |              |   |             |              |             |   |              |              |              |   |              |             |              |   |             |             |              |   |              |             |              |   |              |             |              |   |              |              |              |   |              |              |              |   |              |              |              |   |              |              |              |   |              |              |              |   |              |              |              |   |             |              |             |   |             |              |              |   |              |             |              |   |              |             |             |   |             |              |             |   |             |              |             |   |             |             |             |   |             |              |             |   |             |              |             |   |             |             |             |   |             |             |             |   |             |             |              |   |             |             |             |   |             |             |             |   |              |             |              |   |              |             |              |   |             |             |              |   |             |             |              |   |              |             |              |   |              |              |             |   |              |              |             |   |              |              |             |
| C                                                                                                                                                             | 2.420829000                                                                                                                                                                                                                                                                                                                                                                                                                                                                                                                                                                                                                                                                                                                                                                                                                                                                                                                                                                                                                                                                                                                                                                                                                                                                                                                                                                                                                                                                                                                                                                                                                                                                                                                                                                                                                                                                                                                                                                                                                                                                                                                                                                                                                                                                                                                                                                                                                                                                                                                                                                                                                                                                                                                                                                                                                                                                                                                                                                                                                                                                                                                                                                                                                                                                                                                                                                                                                                                                                                                   | -2.071569000 | -0.001773000 |              |              |   |              |              |             |   |              |              |             |   |              |              |              |   |             |              |              |   |              |              |              |   |              |              |              |   |             |              |             |   |              |              |              |   |              |             |              |   |             |             |              |   |              |             |              |   |              |             |              |   |              |              |              |   |              |              |              |   |              |              |              |   |              |              |              |   |              |              |              |   |              |              |              |   |             |              |             |   |             |              |              |   |              |             |              |   |              |             |             |   |             |              |             |   |             |              |             |   |             |             |             |   |             |              |             |   |             |              |             |   |             |             |             |   |             |             |             |   |             |             |              |   |             |             |             |   |             |             |             |   |              |             |              |   |              |             |              |   |             |             |              |   |             |             |              |   |              |             |              |   |              |              |             |   |              |              |             |   |              |              |             |

|                                                                                                                                  |              |              |              |              |
|----------------------------------------------------------------------------------------------------------------------------------|--------------|--------------|--------------|--------------|
| <b>CorH<sup>+</sup>-W<sub>3</sub></b>                                                                                            | C            | 1.453366000  | -3.053701000 | -0.000071000 |
|                                                                                                                                  | H            | 1.746962000  | -4.099099000 | 0.000812000  |
|                                                                                                                                  | H            | 3.471510000  | -2.342609000 | -0.004249000 |
|                                                                                                                                  | H            | -3.017354000 | -4.162041000 | 0.005332000  |
|                                                                                                                                  | H            | -0.637857000 | -4.774432000 | 0.004915000  |
|                                                                                                                                  | H            | 3.386191000  | 2.499755000  | -0.004695000 |
|                                                                                                                                  | H            | 3.796761000  | 0.200038000  | -0.857352000 |
|                                                                                                                                  | C            | -4.027421000 | -1.649586000 | 0.003924000  |
|                                                                                                                                  | C            | -4.392549000 | -0.332571000 | 0.001710000  |
|                                                                                                                                  | C            | -3.414720000 | 0.696113000  | 0.000160000  |
|                                                                                                                                  | H            | -4.785475000 | -2.426035000 | 0.004386000  |
|                                                                                                                                  | H            | -5.442189000 | -0.056535000 | 0.002365000  |
|                                                                                                                                  | C            | -3.761959000 | 2.065579000  | -0.003616000 |
|                                                                                                                                  | C            | -2.804856000 | 3.052549000  | -0.006126000 |
|                                                                                                                                  | C            | -1.434892000 | 2.730896000  | -0.005888000 |
|                                                                                                                                  | H            | -4.813527000 | 2.336635000  | -0.003075000 |
|                                                                                                                                  | H            | -3.100643000 | 4.096303000  | -0.009859000 |
|                                                                                                                                  | C            | 0.885272000  | 3.428783000  | -0.007079000 |
|                                                                                                                                  | H            | 1.645417000  | 4.203104000  | -0.008090000 |
|                                                                                                                                  | C            | -0.430933000 | 3.748517000  | -0.007285000 |
| H                                                                                                                                | -0.746433000 | 4.786564000  | -0.010415000 |              |
| H                                                                                                                                | 3.789997000  | 0.205115000  | 0.859931000  |              |
| O                                                                                                                                | 5.041424000  | -0.057310000 | -2.506444000 |              |
| H                                                                                                                                | 5.999752000  | -0.026362000 | -2.552595000 |              |
| H                                                                                                                                | 4.752230000  | -0.240740000 | -3.403298000 |              |
| O                                                                                                                                | 5.020332000  | -0.012721000 | 2.523163000  |              |
| H                                                                                                                                | 5.978310000  | 0.018431000  | 2.575940000  |              |
| H                                                                                                                                | 4.724888000  | -0.196728000 | 3.417858000  |              |
| 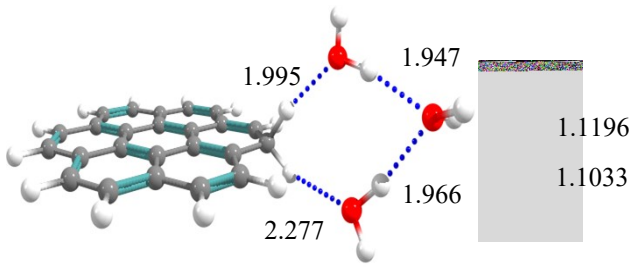 <p><b>CorH<sup>+</sup>-W<sub>3</sub></b></p> | H            | -3.236462000 | -0.707423000 | 0.553651000  |
|                                                                                                                                  | H            | -3.342867000 | -0.559275000 | -1.122048000 |
|                                                                                                                                  | O            | -4.772574000 | -0.940653000 | 1.805901000  |
|                                                                                                                                  | H            | -5.626912000 | -0.578394000 | 1.531703000  |
|                                                                                                                                  | H            | -4.791395000 | -0.977465000 | 2.764013000  |
|                                                                                                                                  | H            | -5.561620000 | 1.048080000  | -2.260445000 |
|                                                                                                                                  | H            | -5.936891000 | 0.556710000  | -0.854864000 |
|                                                                                                                                  | O            | -5.184121000 | 0.744451000  | -1.432510000 |
|                                                                                                                                  | H            | -7.859009000 | -0.561040000 | 0.410230000  |
|                                                                                                                                  | H            | -7.664562000 | 0.851373000  | 0.970523000  |
|                                                                                                                                  | O            | -7.189672000 | 0.105234000  | 0.592700000  |
|                                                                                                                                  | C            | 2.357058000  | 3.539211000  | 0.152841000  |
|                                                                                                                                  | C            | 2.898322000  | 2.226728000  | 0.164431000  |
|                                                                                                                                  | C            | 2.017016000  | 1.123025000  | 0.060947000  |
|                                                                                                                                  | C            | 0.622375000  | 1.337310000  | -0.065537000 |
|                                                                                                                                  | C            | 0.108593000  | 2.653270000  | -0.074849000 |
|                                                                                                                                  | C            | 1.012502000  | 3.745485000  | 0.034575000  |
|                                                                                                                                  | C            | 2.531298000  | -0.195156000 | 0.051765000  |
|                                                                                                                                  | C            | -0.265196000 | 0.232334000  | -0.159350000 |
|                                                                                                                                  | C            | 0.257103000  | -1.092336000 | -0.173979000 |
| C                                                                                                                                | 1.647699000  | -1.305146000 | -0.055279000 |              |
| C                                                                                                                                | -0.618678000 | -2.231119000 | -0.295190000 |              |
| C                                                                                                                                | -1.969034000 | -2.020840000 | -0.401249000 |              |
| C                                                                                                                                | -2.570919000 | -0.700712000 | -0.346616000 |              |
| C                                                                                                                                | -1.652590000 | 0.453668000  | -0.275994000 |              |
| C                                                                                                                                | -2.144690000 | 1.764017000  | -0.304616000 |              |
| C                                                                                                                                | -1.283373000 | 2.835388000  | -0.205275000 |              |
| H                                                                                                                                | -1.677504000 | 3.847051000  | -0.229530000 |              |

|  |   |              |              |              |
|--|---|--------------|--------------|--------------|
|  | H | -3.212903000 | 1.915701000  | -0.423579000 |
|  | H | 3.033758000  | 4.383546000  | 0.235594000  |
|  | H | 0.614301000  | 4.755214000  | 0.023613000  |
|  | H | -2.635624000 | -2.875311000 | -0.487743000 |
|  | C | 4.291136000  | 1.984908000  | 0.280385000  |
|  | C | 4.787232000  | 0.711604000  | 0.282374000  |
|  | C | 3.923273000  | -0.408943000 | 0.169446000  |
|  | H | 4.963359000  | 2.832596000  | 0.364875000  |
|  | H | 5.855546000  | 0.541419000  | 0.370248000  |
|  | C | 4.407663000  | -1.736070000 | 0.159661000  |
|  | C | 3.560419000  | -2.812115000 | 0.041739000  |
|  | C | 2.169636000  | -2.628252000 | -0.072591000 |
|  | H | 5.477448000  | -1.901083000 | 0.246872000  |
|  | H | 3.960455000  | -3.820528000 | 0.033181000  |
|  | C | -0.058237000 | -3.551635000 | -0.308473000 |
|  | H | -0.731812000 | -4.396951000 | -0.404345000 |
|  | C | 1.278980000  | -3.739072000 | -0.199514000 |
|  | H | 1.698096000  | -4.739783000 | -0.208586000 |
|  | C | -3.604956000 | -1.041110000 | -0.003513000 |
|  | C | 0.633075000  | -1.265402000 | -0.002994000 |
|  | C | 4.863660000  | -1.521898000 | -0.000921000 |
|  | C | -5.024217000 | -0.963796000 | 0.000675000  |
|  | C | -0.774969000 | -1.190074000 | 0.006436000  |
|  | C | 3.464283000  | -1.426321000 | 0.004154000  |
|  | C | -5.778068000 | -2.178451000 | -0.000754000 |
|  | C | -1.552533000 | -2.380072000 | -0.005466000 |
|  | C | 2.680768000  | -2.609978000 | -0.003498000 |
|  | C | -2.963493000 | -2.304061000 | 0.004582000  |
|  | C | 1.270091000  | -2.532643000 | 0.007805000  |
|  | C | 5.473665000  | -2.782772000 | -0.002237000 |
|  | C | -3.737883000 | -3.497398000 | -0.001389000 |
|  | C | 0.495747000  | -3.716901000 | -0.003457000 |
|  | C | 4.721505000  | -3.935250000 | -0.001738000 |
|  | C | -5.162860000 | -3.390049000 | -0.001425000 |
|  | C | -0.915538000 | -3.640520000 | 0.004739000  |
|  | C | 3.312631000  | -3.881669000 | 0.000081000  |
|  | C | -1.699507000 | -4.833110000 | -0.001291000 |
|  | C | 2.523204000  | -5.049728000 | 0.000214000  |
|  | C | -3.086462000 | -4.736560000 | -0.001974000 |
|  | C | 1.140760000  | -4.993231000 | 0.000887000  |
|  | C | 0.327556000  | -6.176345000 | -0.000401000 |
|  | C | -1.024069000 | -6.098952000 | -0.001019000 |
|  | C | 0.961275000  | 6.109872000  | -0.000412000 |
|  | C | -0.391140000 | 6.171943000  | -0.001013000 |
|  | C | -1.193226000 | 4.982307000  | -0.001277000 |
|  | C | 3.029369000  | 4.763346000  | 0.000185000  |
|  | C | -2.582757000 | 5.028958000  | -0.001948000 |
|  | C | 1.648448000  | 4.849377000  | 0.000870000  |
|  | C | -3.358215000 | 3.863391000  | -0.001362000 |
|  | C | 0.875539000  | 3.646176000  | -0.003464000 |
|  | C | 5.101336000  | 3.428617000  | -0.001762000 |
|  | C | -4.786682000 | 3.903205000  | -0.001390000 |
|  | C | -0.536117000 | 3.715395000  | 0.004744000  |
|  | C | 3.694428000  | 3.520270000  | 0.000056000  |
|  | C | -5.523280000 | 2.761331000  | -0.000726000 |
|  | C | -1.299418000 | 2.527167000  | -0.005459000 |

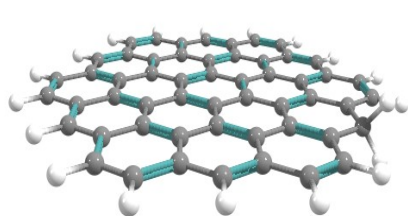

**DbcH<sup>+</sup>**

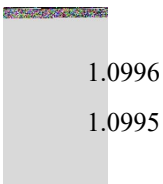

|                                                                                                                                  |   |              |              |              |
|----------------------------------------------------------------------------------------------------------------------------------|---|--------------|--------------|--------------|
|                                                                                                                                  | C | 2.935074000  | 2.320332000  | -0.003512000 |
|                                                                                                                                  | C | -2.710711000 | 2.596719000  | 0.004597000  |
|                                                                                                                                  | C | 1.523927000  | 2.388542000  | 0.007796000  |
|                                                                                                                                  | C | 5.730928000  | 2.204870000  | -0.002251000 |
|                                                                                                                                  | C | -3.478712000 | 1.406462000  | -0.003504000 |
|                                                                                                                                  | C | 0.759906000  | 1.193560000  | -0.002998000 |
|                                                                                                                                  | C | 4.994433000  | 1.013447000  | -0.000925000 |
|                                                                                                                                  | C | -4.898397000 | 1.475569000  | 0.000687000  |
|                                                                                                                                  | C | -0.648415000 | 1.263491000  | 0.006438000  |
|                                                                                                                                  | C | 3.592649000  | 1.062352000  | 0.004144000  |
|                                                                                                                                  | C | -5.637510000 | 0.290762000  | 0.000612000  |
|                                                                                                                                  | C | -1.418525000 | 0.073163000  | -0.003165000 |
|                                                                                                                                  | C | 2.818860000  | -0.145386000 | -0.004046000 |
|                                                                                                                                  | C | -2.835074000 | 0.146224000  | 0.007821000  |
|                                                                                                                                  | C | 1.413720000  | -0.072911000 | 0.007001000  |
|                                                                                                                                  | C | 5.710214000  | -0.294511000 | 0.000561000  |
|                                                                                                                                  | H | -6.607638000 | 2.810299000  | -0.000622000 |
|                                                                                                                                  | H | -6.722679000 | 0.346723000  | 0.002444000  |
|                                                                                                                                  | H | -6.861710000 | -2.115616000 | -0.000655000 |
|                                                                                                                                  | H | 6.557503000  | -2.847059000 | -0.004075000 |
|                                                                                                                                  | H | 6.386550000  | -0.329377000 | -0.865550000 |
|                                                                                                                                  | H | 6.815629000  | 2.157314000  | -0.004106000 |
|                                                                                                                                  | H | 5.212352000  | -4.903570000 | -0.002158000 |
|                                                                                                                                  | H | 3.018181000  | -6.016749000 | 0.001926000  |
|                                                                                                                                  | H | 0.822735000  | -7.142113000 | -0.000172000 |
|                                                                                                                                  | H | -1.624577000 | -7.003016000 | -0.002291000 |
|                                                                                                                                  | H | -3.681381000 | -5.645190000 | -0.005178000 |
|                                                                                                                                  | H | -5.750963000 | -4.302153000 | -0.002857000 |
|                                                                                                                                  | H | -5.277842000 | 4.870964000  | -0.002810000 |
|                                                                                                                                  | H | -3.081050000 | 5.993965000  | -0.005143000 |
|                                                                                                                                  | H | -0.895461000 | 7.132985000  | -0.002278000 |
|                                                                                                                                  | H | 1.553176000  | 7.019578000  | -0.000192000 |
|                                                                                                                                  | H | 3.621200000  | 5.674317000  | 0.001885000  |
|                                                                                                                                  | H | 5.689196000  | 4.341303000  | -0.002194000 |
|                                                                                                                                  | H | 6.380875000  | -0.329100000 | 0.871274000  |
|                                                                                                                                  | C | -3.597238000 | 1.686938000  | 0.042690000  |
|                                                                                                                                  | C | 0.608571000  | 1.126664000  | -0.060958000 |
|                                                                                                                                  | C | 4.812374000  | 0.598427000  | -0.180480000 |
|                                                                                                                                  | C | -5.006348000 | 1.872176000  | 0.071679000  |
|                                                                                                                                  | C | -0.789311000 | 1.312088000  | -0.035003000 |
|                                                                                                                                  | C | 3.419297000  | 0.763549000  | -0.146082000 |
|                                                                                                                                  | C | -5.523180000 | 3.205289000  | 0.085449000  |
|                                                                                                                                  | C | -1.333773000 | 2.625119000  | -0.006247000 |
|                                                                                                                                  | C | 2.868332000  | 2.070905000  | -0.105733000 |
|                                                                                                                                  | C | -2.734386000 | 2.810333000  | 0.016154000  |
|                                                                                                                                  | C | 1.467998000  | 2.255060000  | -0.084566000 |
|                                                                                                                                  | C | 5.648958000  | 1.723482000  | -0.160727000 |
|                                                                                                                                  | C | -3.275175000 | 4.126047000  | 0.037496000  |
|                                                                                                                                  | C | 0.925841000  | 3.561474000  | -0.052351000 |
|                                                                                                                                  | C | 5.120635000  | 2.993458000  | -0.129704000 |
|                                                                                                                                  | C | -4.695617000 | 4.282653000  | 0.068997000  |
|                                                                                                                                  | C | -0.475653000 | 3.746608000  | -0.030453000 |
|                                                                                                                                  | C | 3.725042000  | 3.203155000  | -0.111713000 |
|                                                                                                                                  | C | -1.025709000 | 5.062868000  | -0.006383000 |
|                                                                                                                                  | C | 3.165096000  | 4.495833000  | -0.089280000 |
|                                                                                                                                  | C | -2.406947000 | 5.223570000  | 0.023481000  |
| 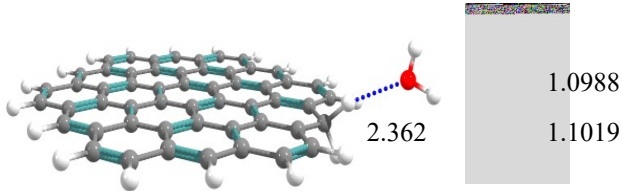 <p><b>DbcH<sup>+</sup>-W<sub>1</sub></b></p> |   |              |              |              |

|  |   |              |              |              |
|--|---|--------------|--------------|--------------|
|  | C | 1.795263000  | 4.696056000  | -0.065118000 |
|  | C | 1.214495000  | 6.008486000  | -0.044711000 |
|  | C | -0.128254000 | 6.181994000  | -0.018110000 |
|  | C | -0.423972000 | -6.181608000 | 0.001459000  |
|  | C | -1.764532000 | -5.993956000 | 0.031557000  |
|  | C | -2.334432000 | -4.677265000 | 0.034876000  |
|  | C | 1.856267000  | -5.238529000 | -0.061898000 |
|  | C | -3.708725000 | -4.467420000 | 0.066160000  |
|  | C | 0.482901000  | -5.069275000 | -0.030591000 |
|  | C | -4.256557000 | -3.179337000 | 0.070550000  |
|  | C | -0.055685000 | -3.744835000 | -0.024354000 |
|  | C | 4.137962000  | -4.306976000 | -0.130950000 |
|  | C | -5.667756000 | -2.955323000 | 0.102544000  |
|  | C | -1.456282000 | -3.553179000 | 0.000058000  |
|  | C | 2.737590000  | -4.139486000 | -0.095918000 |
|  | C | -6.181651000 | -1.697534000 | 0.108572000  |
|  | C | -1.987868000 | -2.244788000 | 0.015015000  |
|  | C | 2.211518000  | -2.820561000 | -0.091151000 |
|  | C | -3.387750000 | -2.053462000 | 0.038105000  |
|  | C | 0.812069000  | -2.628297000 | -0.066331000 |
|  | C | 4.980543000  | -3.220475000 | -0.173059000 |
|  | C | -3.923523000 | -0.741900000 | 0.053898000  |
|  | C | 0.280863000  | -1.312778000 | -0.050886000 |
|  | C | 4.475612000  | -1.912764000 | -0.180011000 |
|  | C | -5.331388000 | -0.548449000 | 0.083047000  |
|  | C | -1.116168000 | -1.122402000 | -0.024409000 |
|  | C | 3.088441000  | -1.705270000 | -0.139026000 |
|  | C | -5.839768000 | 0.752183000  | 0.092437000  |
|  | C | -1.653588000 | 0.189238000  | -0.004515000 |
|  | C | 2.550472000  | -0.376055000 | -0.120704000 |
|  | C | -3.059656000 | 0.378249000  | 0.019164000  |
|  | C | 1.155229000  | -0.188684000 | -0.088833000 |
|  | C | 5.413401000  | -0.760456000 | -0.265377000 |
|  | H | -7.256249000 | -1.546163000 | 0.133183000  |
|  | H | -6.916452000 | 0.896888000  | 0.115963000  |
|  | H | -6.599609000 | 3.343100000  | 0.109687000  |
|  | H | 6.723978000  | 1.572830000  | -0.154348000 |
|  | H | 6.217657000  | -0.852652000 | 0.477611000  |
|  | H | 6.055300000  | -3.371060000 | -0.200930000 |
|  | H | 5.781157000  | 3.855243000  | -0.117684000 |
|  | H | 3.829726000  | 5.355232000  | -0.093989000 |
|  | H | 1.879153000  | 6.866508000  | -0.052264000 |
|  | H | -0.551234000 | 7.181434000  | -0.003302000 |
|  | H | -2.823885000 | 6.226331000  | 0.039493000  |
|  | H | -5.105481000 | 5.287513000  | 0.080999000  |
|  | H | -6.328314000 | -3.816198000 | 0.123323000  |
|  | H | -4.375602000 | -5.324335000 | 0.090540000  |
|  | H | -2.436563000 | -6.845913000 | 0.055146000  |
|  | H | -0.009505000 | -7.184708000 | -0.000269000 |
|  | H | 2.270295000  | -6.242925000 | -0.064265000 |
|  | H | 4.547989000  | -5.312276000 | -0.126338000 |
|  | H | 5.947296000  | -0.830495000 | -1.226793000 |
|  | O | 8.324560000  | 0.008865000  | 1.111300000  |
|  | H | 9.180678000  | -0.271119000 | 0.778924000  |
|  | H | 8.489917000  | 0.276826000  | 2.018375000  |
|  | C | 4.037335000  | 1.056631000  | 0.012608000  |

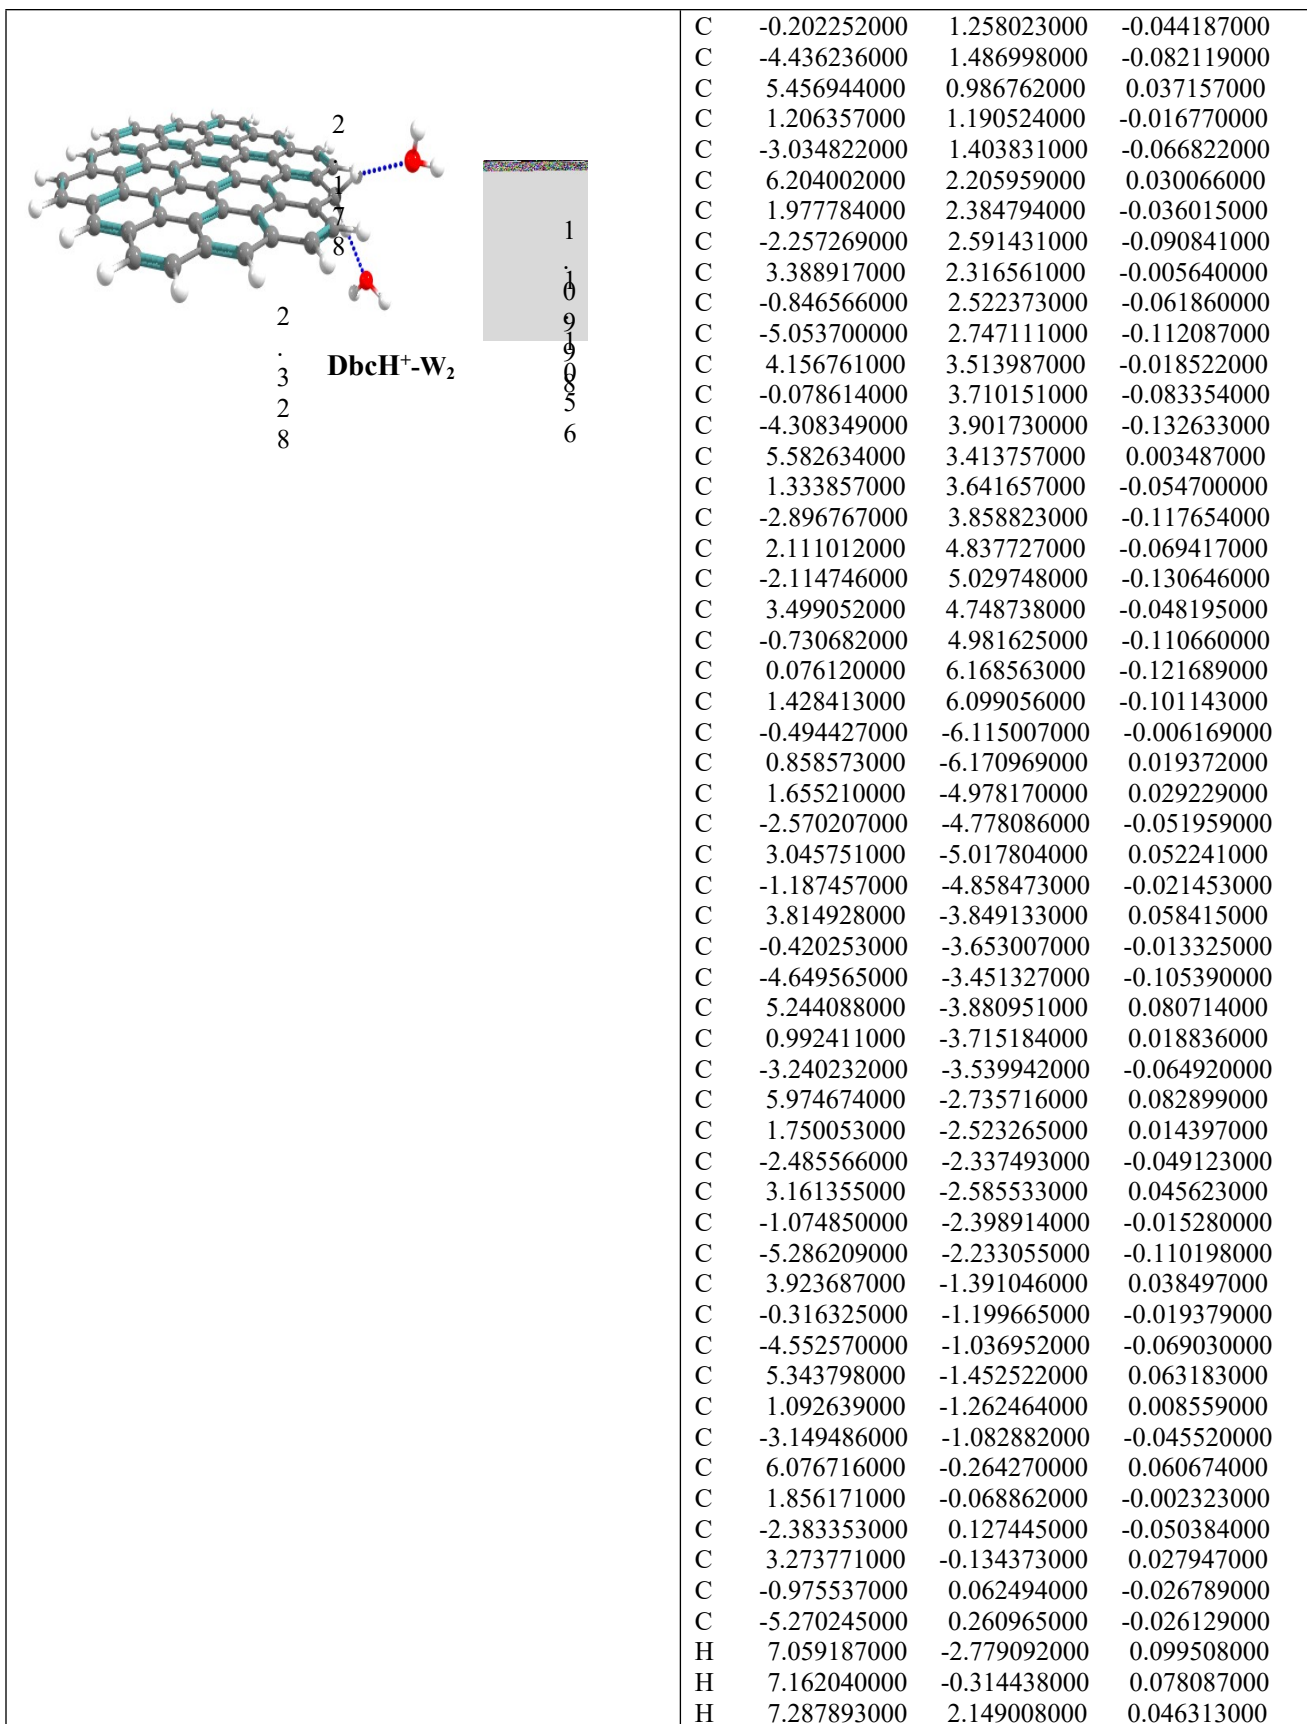



|                                                                                                                                                             |   |              |              |              |
|-------------------------------------------------------------------------------------------------------------------------------------------------------------|---|--------------|--------------|--------------|
|                                                                                                                                                             | H | -6.137695000 | 2.799441000  | -0.115471000 |
|                                                                                                                                                             | H | -6.045315000 | 0.276212000  | -0.806222000 |
|                                                                                                                                                             | H | -6.368757000 | -2.176745000 | -0.162364000 |
|                                                                                                                                                             | H | -4.803850000 | 4.867612000  | -0.157933000 |
|                                                                                                                                                             | H | -2.614414000 | 5.994210000  | -0.153709000 |
|                                                                                                                                                             | H | -0.423965000 | 7.131588000  | -0.146130000 |
|                                                                                                                                                             | H | 2.023708000  | 7.006598000  | -0.109752000 |
|                                                                                                                                                             | H | 4.088987000  | 5.660652000  | -0.057580000 |
|                                                                                                                                                             | H | 6.165949000  | 4.328993000  | -0.002684000 |
|                                                                                                                                                             | H | 5.740053000  | -4.846241000 | 0.094550000  |
|                                                                                                                                                             | H | 3.548558000  | -5.980499000 | 0.062296000  |
|                                                                                                                                                             | H | 1.366951000  | -7.129874000 | 0.030808000  |
|                                                                                                                                                             | H | -1.081643000 | -7.027817000 | -0.014722000 |
|                                                                                                                                                             | H | -3.157029000 | -5.692376000 | -0.064283000 |
|                                                                                                                                                             | H | -5.231498000 | -4.367730000 | -0.134747000 |
|                                                                                                                                                             | H | -5.854998000 | 0.302100000  | 0.911335000  |
|                                                                                                                                                             | O | -7.893845000 | -0.748555000 | -1.783293000 |
|                                                                                                                                                             | H | -8.798922000 | -0.459197000 | -1.646989000 |
|                                                                                                                                                             | H | -7.871902000 | -1.067754000 | -2.688478000 |
|                                                                                                                                                             | O | -6.953699000 | 0.852097000  | 2.710052000  |
|                                                                                                                                                             | H | -7.757364000 | 0.451981000  | 3.049142000  |
|                                                                                                                                                             | H | -6.556012000 | 1.290611000  | 3.465480000  |
| 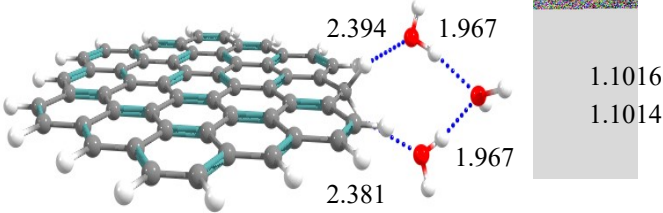 <p style="text-align: center;"><b>DbcH<sup>+</sup>-W<sub>3</sub></b></p> | C | 4.292465000  | 1.228642000  | 0.012913000  |
|                                                                                                                                                             | C | 0.047516000  | 1.229479000  | 0.008531000  |
|                                                                                                                                                             | C | -4.192436000 | 1.259531000  | -0.005115000 |
|                                                                                                                                                             | C | 5.714086000  | 1.225711000  | 0.018429000  |
|                                                                                                                                                             | C | 1.458122000  | 1.228382000  | 0.019708000  |
|                                                                                                                                                             | C | -2.788696000 | 1.241247000  | 0.009928000  |
|                                                                                                                                                             | C | 6.402517000  | 2.479056000  | 0.032563000  |
|                                                                                                                                                             | C | 2.172027000  | 2.458168000  | 0.022106000  |
|                                                                                                                                                             | C | -2.068346000 | 2.464487000  | 0.012599000  |
|                                                                                                                                                             | C | 3.585033000  | 2.456443000  | 0.034064000  |
|                                                                                                                                                             | C | -0.655981000 | 2.461859000  | 0.029330000  |
|                                                                                                                                                             | C | -4.872363000 | 2.487952000  | -0.024721000 |
|                                                                                                                                                             | C | 4.295152000  | 3.689082000  | 0.042945000  |
|                                                                                                                                                             | C | 0.054682000  | 3.684880000  | 0.031316000  |
|                                                                                                                                                             | C | -4.180439000 | 3.675329000  | -0.009054000 |
|                                                                                                                                                             | C | 5.724518000  | 3.656091000  | 0.044645000  |
|                                                                                                                                                             | C | 1.469218000  | 3.683021000  | 0.043589000  |
|                                                                                                                                                             | C | -2.767977000 | 3.699781000  | 0.016700000  |
|                                                                                                                                                             | C | 2.188522000  | 4.914599000  | 0.051765000  |
|                                                                                                                                                             | C | -2.042462000 | 4.906029000  | 0.031771000  |
|                                                                                                                                                             | C | 3.579646000  | 4.891269000  | 0.053948000  |
|                                                                                                                                                             | C | -0.657175000 | 4.923707000  | 0.042850000  |
|                                                                                                                                                             | C | 0.092215000  | 6.147479000  | 0.056669000  |
|                                                                                                                                                             | C | 1.446579000  | 6.142200000  | 0.061729000  |
|                                                                                                                                                             | C | 0.104104000  | -6.148546000 | -0.060492000 |
|                                                                                                                                                             | C | 1.458453000  | -6.140651000 | -0.064453000 |
|                                                                                                                                                             | C | 2.198018000  | -4.911615000 | -0.053729000 |
|                                                                                                                                                             | C | -2.032989000 | -4.911218000 | -0.037963000 |
|                                                                                                                                                             | C | 3.589087000  | -4.885608000 | -0.054878000 |
|                                                                                                                                                             | C | -0.647656000 | -4.926234000 | -0.045607000 |
|                                                                                                                                                             | C | 4.302275000  | -3.682058000 | -0.041504000 |
|                                                                                                                                                             | C | 0.061776000  | -3.685961000 | -0.041436000 |
|                                                                                                                                                             | C | -4.173437000 | -3.684596000 | -0.004692000 |
|                                                                                                                                                             | C | 5.731569000  | -3.646333000 | -0.040637000 |

|   |               |              |              |
|---|---------------|--------------|--------------|
| C | 1.476345000   | -3.681533000 | -0.035143000 |
| C | -2.760846000  | -3.706351000 | -0.024634000 |
| C | 6.407295000   | -2.468013000 | -0.026092000 |
| C | 2.176764000   | -2.455126000 | -0.032924000 |
| C | -2.063636000  | -2.469670000 | -0.026635000 |
| C | 3.589780000   | -2.450912000 | -0.022426000 |
| C | -0.651196000  | -2.464494000 | -0.018883000 |
| C | -4.867594000  | -2.498510000 | 0.008470000  |
| C | 4.294833000   | -1.221577000 | -0.015878000 |
| C | 0.049889000   | -1.230562000 | -0.018351000 |
| C | -4.190009000  | -1.268777000 | -0.008748000 |
| C | 5.716442000   | -1.216025000 | -0.010564000 |
| C | 1.460492000   | -1.226968000 | -0.008059000 |
| C | -2.786262000  | -1.247872000 | -0.010984000 |
| C | 6.392422000   | 0.005495000  | 0.004544000  |
| C | 2.166663000   | 0.001495000  | -0.003130000 |
| C | -2.078017000  | -0.002551000 | -0.007864000 |
| C | 3.586269000   | 0.002727000  | 0.009005000  |
| C | -0.668160000  | -0.001326000 | 0.004173000  |
| C | -4.968223000  | -0.005371000 | -0.007221000 |
| H | 7.492793000   | -2.460166000 | -0.025282000 |
| H | 7.479052000   | 0.006508000  | 0.007345000  |
| H | 7.488027000   | 2.473277000  | 0.033951000  |
| H | -5.956598000  | 2.477608000  | -0.074443000 |
| H | -5.952033000  | -2.490449000 | 0.052855000  |
| H | -4.719993000  | 4.617739000  | -0.021184000 |
| H | -2.587407000  | 5.845975000  | 0.035228000  |
| H | -0.453235000  | 7.085888000  | 0.063378000  |
| H | 1.998001000   | 7.077055000  | 0.071807000  |
| H | 4.125576000   | 5.830230000  | 0.061751000  |
| H | 6.263756000   | 4.597964000  | 0.054809000  |
| H | 6.272634000   | -4.587138000 | -0.052456000 |
| H | 4.136831000   | -5.823454000 | -0.067861000 |
| H | 2.011686000   | -7.074419000 | -0.075961000 |
| H | -0.439531000  | -7.088003000 | -0.067658000 |
| H | -2.576098000  | -5.852231000 | -0.038821000 |
| H | -4.711237000  | -4.628017000 | 0.006348000  |
| H | -5.664750000  | -0.025243000 | 0.845933000  |
| H | -5.665817000  | 0.012831000  | -0.859303000 |
| O | -7.646677000  | -1.221909000 | 1.404628000  |
| H | -8.453142000  | -0.834120000 | 1.039095000  |
| H | -7.893882000  | -1.565601000 | 2.265101000  |
| H | -7.923533000  | 1.559383000  | -2.249151000 |
| H | -8.466594000  | 0.832096000  | -1.013411000 |
| O | -7.665030000  | 1.218700000  | -1.390800000 |
| H | -10.501655000 | -0.620387000 | -0.421329000 |
| H | -10.495094000 | 0.621401000  | 0.476282000  |
| O | -9.917416000  | 0.000355000  | 0.023442000  |

**Table S5:** MP2/6-311++G\*\* optimized equilibrium structures of  $\text{BzH}^+ \cdot \text{W}_n$  ( $n = 1 - 3$ ) complexes. the intermonomer distances (in Å) are given.

|                                                                                                                                                                                            |                                                                                                                                                                                                                                                                                                                                                                                                                                                                                                                                                                                                                                                                                                                                                                                                                                                                                                                                                                                                                                                                                                                                                                                                                                                                                                                                                                                                          |              |              |              |              |   |              |              |              |   |              |             |              |   |              |              |              |   |              |              |              |   |              |              |              |   |              |              |              |   |              |              |              |   |              |             |              |   |              |              |              |   |              |              |              |   |             |              |              |   |              |              |              |   |              |             |              |   |              |              |              |   |              |              |              |
|--------------------------------------------------------------------------------------------------------------------------------------------------------------------------------------------|----------------------------------------------------------------------------------------------------------------------------------------------------------------------------------------------------------------------------------------------------------------------------------------------------------------------------------------------------------------------------------------------------------------------------------------------------------------------------------------------------------------------------------------------------------------------------------------------------------------------------------------------------------------------------------------------------------------------------------------------------------------------------------------------------------------------------------------------------------------------------------------------------------------------------------------------------------------------------------------------------------------------------------------------------------------------------------------------------------------------------------------------------------------------------------------------------------------------------------------------------------------------------------------------------------------------------------------------------------------------------------------------------------|--------------|--------------|--------------|--------------|---|--------------|--------------|--------------|---|--------------|-------------|--------------|---|--------------|--------------|--------------|---|--------------|--------------|--------------|---|--------------|--------------|--------------|---|--------------|--------------|--------------|---|--------------|--------------|--------------|---|--------------|-------------|--------------|---|--------------|--------------|--------------|---|--------------|--------------|--------------|---|-------------|--------------|--------------|---|--------------|--------------|--------------|---|--------------|-------------|--------------|---|--------------|--------------|--------------|---|--------------|--------------|--------------|
| 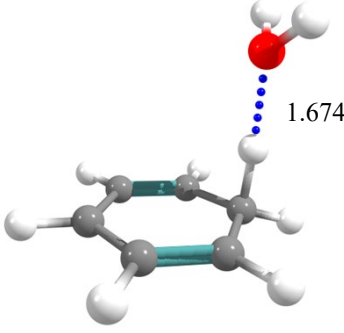 <p style="text-align: center;"><b>BzH<sup>+</sup>-W<sub>1a</sub></b><br/><b>[-308.1677143147]</b></p>    | <table border="1"> <tbody> <tr><td>C</td><td>0.388089000</td><td>0.000506000</td><td>1.160202000</td></tr> <tr><td>C</td><td>-0.183829000</td><td>-1.241067000</td><td>0.700215000</td></tr> <tr><td>C</td><td>-0.185145000</td><td>1.241398000</td><td>0.699987000</td></tr> <tr><td>H</td><td>0.200059000</td><td>-2.178851000</td><td>1.093901000</td></tr> <tr><td>H</td><td>0.197698000</td><td>2.179655000</td><td>1.093573000</td></tr> <tr><td>C</td><td>-1.126728000</td><td>-1.230027000</td><td>-0.318454000</td></tr> <tr><td>C</td><td>-1.127987000</td><td>1.229136000</td><td>-0.318716000</td></tr> <tr><td>H</td><td>-1.528073000</td><td>-2.160542000</td><td>-0.706825000</td></tr> <tr><td>H</td><td>-1.530345000</td><td>2.159142000</td><td>-0.707270000</td></tr> <tr><td>C</td><td>-1.607355000</td><td>-0.000756000</td><td>-0.802244000</td></tr> <tr><td>H</td><td>-2.358587000</td><td>-0.001226000</td><td>-1.588710000</td></tr> <tr><td>H</td><td>0.902771000</td><td>0.000883000</td><td>2.121126000</td></tr> <tr><td>H</td><td>1.284650000</td><td>0.000928000</td><td>0.373779000</td></tr> <tr><td>O</td><td>2.478219000</td><td>0.000075000</td><td>-0.800658000</td></tr> <tr><td>H</td><td>3.027586000</td><td>0.765663000</td><td>-1.004208000</td></tr> <tr><td>H</td><td>3.036216000</td><td>-0.761393000</td><td>-0.996043000</td></tr> </tbody> </table>     | C            | 0.388089000  | 0.000506000  | 1.160202000  | C | -0.183829000 | -1.241067000 | 0.700215000  | C | -0.185145000 | 1.241398000 | 0.699987000  | H | 0.200059000  | -2.178851000 | 1.093901000  | H | 0.197698000  | 2.179655000  | 1.093573000  | C | -1.126728000 | -1.230027000 | -0.318454000 | C | -1.127987000 | 1.229136000  | -0.318716000 | H | -1.528073000 | -2.160542000 | -0.706825000 | H | -1.530345000 | 2.159142000 | -0.707270000 | C | -1.607355000 | -0.000756000 | -0.802244000 | H | -2.358587000 | -0.001226000 | -1.588710000 | H | 0.902771000 | 0.000883000  | 2.121126000  | H | 1.284650000  | 0.000928000  | 0.373779000  | O | 2.478219000  | 0.000075000 | -0.800658000 | H | 3.027586000  | 0.765663000  | -1.004208000 | H | 3.036216000  | -0.761393000 | -0.996043000 |
| C                                                                                                                                                                                          | 0.388089000                                                                                                                                                                                                                                                                                                                                                                                                                                                                                                                                                                                                                                                                                                                                                                                                                                                                                                                                                                                                                                                                                                                                                                                                                                                                                                                                                                                              | 0.000506000  | 1.160202000  |              |              |   |              |              |              |   |              |             |              |   |              |              |              |   |              |              |              |   |              |              |              |   |              |              |              |   |              |              |              |   |              |             |              |   |              |              |              |   |              |              |              |   |             |              |              |   |              |              |              |   |              |             |              |   |              |              |              |   |              |              |              |
| C                                                                                                                                                                                          | -0.183829000                                                                                                                                                                                                                                                                                                                                                                                                                                                                                                                                                                                                                                                                                                                                                                                                                                                                                                                                                                                                                                                                                                                                                                                                                                                                                                                                                                                             | -1.241067000 | 0.700215000  |              |              |   |              |              |              |   |              |             |              |   |              |              |              |   |              |              |              |   |              |              |              |   |              |              |              |   |              |              |              |   |              |             |              |   |              |              |              |   |              |              |              |   |             |              |              |   |              |              |              |   |              |             |              |   |              |              |              |   |              |              |              |
| C                                                                                                                                                                                          | -0.185145000                                                                                                                                                                                                                                                                                                                                                                                                                                                                                                                                                                                                                                                                                                                                                                                                                                                                                                                                                                                                                                                                                                                                                                                                                                                                                                                                                                                             | 1.241398000  | 0.699987000  |              |              |   |              |              |              |   |              |             |              |   |              |              |              |   |              |              |              |   |              |              |              |   |              |              |              |   |              |              |              |   |              |             |              |   |              |              |              |   |              |              |              |   |             |              |              |   |              |              |              |   |              |             |              |   |              |              |              |   |              |              |              |
| H                                                                                                                                                                                          | 0.200059000                                                                                                                                                                                                                                                                                                                                                                                                                                                                                                                                                                                                                                                                                                                                                                                                                                                                                                                                                                                                                                                                                                                                                                                                                                                                                                                                                                                              | -2.178851000 | 1.093901000  |              |              |   |              |              |              |   |              |             |              |   |              |              |              |   |              |              |              |   |              |              |              |   |              |              |              |   |              |              |              |   |              |             |              |   |              |              |              |   |              |              |              |   |             |              |              |   |              |              |              |   |              |             |              |   |              |              |              |   |              |              |              |
| H                                                                                                                                                                                          | 0.197698000                                                                                                                                                                                                                                                                                                                                                                                                                                                                                                                                                                                                                                                                                                                                                                                                                                                                                                                                                                                                                                                                                                                                                                                                                                                                                                                                                                                              | 2.179655000  | 1.093573000  |              |              |   |              |              |              |   |              |             |              |   |              |              |              |   |              |              |              |   |              |              |              |   |              |              |              |   |              |              |              |   |              |             |              |   |              |              |              |   |              |              |              |   |             |              |              |   |              |              |              |   |              |             |              |   |              |              |              |   |              |              |              |
| C                                                                                                                                                                                          | -1.126728000                                                                                                                                                                                                                                                                                                                                                                                                                                                                                                                                                                                                                                                                                                                                                                                                                                                                                                                                                                                                                                                                                                                                                                                                                                                                                                                                                                                             | -1.230027000 | -0.318454000 |              |              |   |              |              |              |   |              |             |              |   |              |              |              |   |              |              |              |   |              |              |              |   |              |              |              |   |              |              |              |   |              |             |              |   |              |              |              |   |              |              |              |   |             |              |              |   |              |              |              |   |              |             |              |   |              |              |              |   |              |              |              |
| C                                                                                                                                                                                          | -1.127987000                                                                                                                                                                                                                                                                                                                                                                                                                                                                                                                                                                                                                                                                                                                                                                                                                                                                                                                                                                                                                                                                                                                                                                                                                                                                                                                                                                                             | 1.229136000  | -0.318716000 |              |              |   |              |              |              |   |              |             |              |   |              |              |              |   |              |              |              |   |              |              |              |   |              |              |              |   |              |              |              |   |              |             |              |   |              |              |              |   |              |              |              |   |             |              |              |   |              |              |              |   |              |             |              |   |              |              |              |   |              |              |              |
| H                                                                                                                                                                                          | -1.528073000                                                                                                                                                                                                                                                                                                                                                                                                                                                                                                                                                                                                                                                                                                                                                                                                                                                                                                                                                                                                                                                                                                                                                                                                                                                                                                                                                                                             | -2.160542000 | -0.706825000 |              |              |   |              |              |              |   |              |             |              |   |              |              |              |   |              |              |              |   |              |              |              |   |              |              |              |   |              |              |              |   |              |             |              |   |              |              |              |   |              |              |              |   |             |              |              |   |              |              |              |   |              |             |              |   |              |              |              |   |              |              |              |
| H                                                                                                                                                                                          | -1.530345000                                                                                                                                                                                                                                                                                                                                                                                                                                                                                                                                                                                                                                                                                                                                                                                                                                                                                                                                                                                                                                                                                                                                                                                                                                                                                                                                                                                             | 2.159142000  | -0.707270000 |              |              |   |              |              |              |   |              |             |              |   |              |              |              |   |              |              |              |   |              |              |              |   |              |              |              |   |              |              |              |   |              |             |              |   |              |              |              |   |              |              |              |   |             |              |              |   |              |              |              |   |              |             |              |   |              |              |              |   |              |              |              |
| C                                                                                                                                                                                          | -1.607355000                                                                                                                                                                                                                                                                                                                                                                                                                                                                                                                                                                                                                                                                                                                                                                                                                                                                                                                                                                                                                                                                                                                                                                                                                                                                                                                                                                                             | -0.000756000 | -0.802244000 |              |              |   |              |              |              |   |              |             |              |   |              |              |              |   |              |              |              |   |              |              |              |   |              |              |              |   |              |              |              |   |              |             |              |   |              |              |              |   |              |              |              |   |             |              |              |   |              |              |              |   |              |             |              |   |              |              |              |   |              |              |              |
| H                                                                                                                                                                                          | -2.358587000                                                                                                                                                                                                                                                                                                                                                                                                                                                                                                                                                                                                                                                                                                                                                                                                                                                                                                                                                                                                                                                                                                                                                                                                                                                                                                                                                                                             | -0.001226000 | -1.588710000 |              |              |   |              |              |              |   |              |             |              |   |              |              |              |   |              |              |              |   |              |              |              |   |              |              |              |   |              |              |              |   |              |             |              |   |              |              |              |   |              |              |              |   |             |              |              |   |              |              |              |   |              |             |              |   |              |              |              |   |              |              |              |
| H                                                                                                                                                                                          | 0.902771000                                                                                                                                                                                                                                                                                                                                                                                                                                                                                                                                                                                                                                                                                                                                                                                                                                                                                                                                                                                                                                                                                                                                                                                                                                                                                                                                                                                              | 0.000883000  | 2.121126000  |              |              |   |              |              |              |   |              |             |              |   |              |              |              |   |              |              |              |   |              |              |              |   |              |              |              |   |              |              |              |   |              |             |              |   |              |              |              |   |              |              |              |   |             |              |              |   |              |              |              |   |              |             |              |   |              |              |              |   |              |              |              |
| H                                                                                                                                                                                          | 1.284650000                                                                                                                                                                                                                                                                                                                                                                                                                                                                                                                                                                                                                                                                                                                                                                                                                                                                                                                                                                                                                                                                                                                                                                                                                                                                                                                                                                                              | 0.000928000  | 0.373779000  |              |              |   |              |              |              |   |              |             |              |   |              |              |              |   |              |              |              |   |              |              |              |   |              |              |              |   |              |              |              |   |              |             |              |   |              |              |              |   |              |              |              |   |             |              |              |   |              |              |              |   |              |             |              |   |              |              |              |   |              |              |              |
| O                                                                                                                                                                                          | 2.478219000                                                                                                                                                                                                                                                                                                                                                                                                                                                                                                                                                                                                                                                                                                                                                                                                                                                                                                                                                                                                                                                                                                                                                                                                                                                                                                                                                                                              | 0.000075000  | -0.800658000 |              |              |   |              |              |              |   |              |             |              |   |              |              |              |   |              |              |              |   |              |              |              |   |              |              |              |   |              |              |              |   |              |             |              |   |              |              |              |   |              |              |              |   |             |              |              |   |              |              |              |   |              |             |              |   |              |              |              |   |              |              |              |
| H                                                                                                                                                                                          | 3.027586000                                                                                                                                                                                                                                                                                                                                                                                                                                                                                                                                                                                                                                                                                                                                                                                                                                                                                                                                                                                                                                                                                                                                                                                                                                                                                                                                                                                              | 0.765663000  | -1.004208000 |              |              |   |              |              |              |   |              |             |              |   |              |              |              |   |              |              |              |   |              |              |              |   |              |              |              |   |              |              |              |   |              |             |              |   |              |              |              |   |              |              |              |   |             |              |              |   |              |              |              |   |              |             |              |   |              |              |              |   |              |              |              |
| H                                                                                                                                                                                          | 3.036216000                                                                                                                                                                                                                                                                                                                                                                                                                                                                                                                                                                                                                                                                                                                                                                                                                                                                                                                                                                                                                                                                                                                                                                                                                                                                                                                                                                                              | -0.761393000 | -0.996043000 |              |              |   |              |              |              |   |              |             |              |   |              |              |              |   |              |              |              |   |              |              |              |   |              |              |              |   |              |              |              |   |              |             |              |   |              |              |              |   |              |              |              |   |             |              |              |   |              |              |              |   |              |             |              |   |              |              |              |   |              |              |              |
|  <p style="text-align: center;"><b>BzH<sup>+</sup>-W<sub>1b</sub></b><br/><b>[-308.17756128365]</b></p>  | <table border="1"> <tbody> <tr><td>C</td><td>1.345934000</td><td>-0.298945000</td><td>-0.860970000</td></tr> <tr><td>C</td><td>1.092484000</td><td>1.037587000</td><td>-0.512228000</td></tr> <tr><td>C</td><td>0.279324000</td><td>1.335079000</td><td>0.590912000</td></tr> <tr><td>C</td><td>-0.303542000</td><td>0.289991000</td><td>1.335542000</td></tr> <tr><td>C</td><td>-0.047379000</td><td>-1.051289000</td><td>0.983214000</td></tr> <tr><td>C</td><td>0.775408000</td><td>-1.342538000</td><td>-0.118394000</td></tr> <tr><td>H</td><td>2.001221000</td><td>-0.525070000</td><td>-1.697542000</td></tr> <tr><td>H</td><td>1.561802000</td><td>1.842568000</td><td>-1.071208000</td></tr> <tr><td>H</td><td>0.112099000</td><td>2.367569000</td><td>0.886386000</td></tr> <tr><td>H</td><td>-0.907013000</td><td>0.514683000</td><td>2.211487000</td></tr> <tr><td>H</td><td>-0.467332000</td><td>-1.855688000</td><td>1.582122000</td></tr> <tr><td>H</td><td>0.998821000</td><td>-2.376030000</td><td>-0.368776000</td></tr> <tr><td>H</td><td>-2.109088000</td><td>-0.808208000</td><td>-1.374328000</td></tr> <tr><td>O</td><td>-2.095234000</td><td>0.033140000</td><td>-0.884176000</td></tr> <tr><td>H</td><td>-1.410313000</td><td>-0.007211000</td><td>-0.113851000</td></tr> <tr><td>H</td><td>-1.871696000</td><td>0.762967000</td><td>-1.489339000</td></tr> </tbody> </table>   | C            | 1.345934000  | -0.298945000 | -0.860970000 | C | 1.092484000  | 1.037587000  | -0.512228000 | C | 0.279324000  | 1.335079000 | 0.590912000  | C | -0.303542000 | 0.289991000  | 1.335542000  | C | -0.047379000 | -1.051289000 | 0.983214000  | C | 0.775408000  | -1.342538000 | -0.118394000 | H | 2.001221000  | -0.525070000 | -1.697542000 | H | 1.561802000  | 1.842568000  | -1.071208000 | H | 0.112099000  | 2.367569000 | 0.886386000  | H | -0.907013000 | 0.514683000  | 2.211487000  | H | -0.467332000 | -1.855688000 | 1.582122000  | H | 0.998821000 | -2.376030000 | -0.368776000 | H | -2.109088000 | -0.808208000 | -1.374328000 | O | -2.095234000 | 0.033140000 | -0.884176000 | H | -1.410313000 | -0.007211000 | -0.113851000 | H | -1.871696000 | 0.762967000  | -1.489339000 |
| C                                                                                                                                                                                          | 1.345934000                                                                                                                                                                                                                                                                                                                                                                                                                                                                                                                                                                                                                                                                                                                                                                                                                                                                                                                                                                                                                                                                                                                                                                                                                                                                                                                                                                                              | -0.298945000 | -0.860970000 |              |              |   |              |              |              |   |              |             |              |   |              |              |              |   |              |              |              |   |              |              |              |   |              |              |              |   |              |              |              |   |              |             |              |   |              |              |              |   |              |              |              |   |             |              |              |   |              |              |              |   |              |             |              |   |              |              |              |   |              |              |              |
| C                                                                                                                                                                                          | 1.092484000                                                                                                                                                                                                                                                                                                                                                                                                                                                                                                                                                                                                                                                                                                                                                                                                                                                                                                                                                                                                                                                                                                                                                                                                                                                                                                                                                                                              | 1.037587000  | -0.512228000 |              |              |   |              |              |              |   |              |             |              |   |              |              |              |   |              |              |              |   |              |              |              |   |              |              |              |   |              |              |              |   |              |             |              |   |              |              |              |   |              |              |              |   |             |              |              |   |              |              |              |   |              |             |              |   |              |              |              |   |              |              |              |
| C                                                                                                                                                                                          | 0.279324000                                                                                                                                                                                                                                                                                                                                                                                                                                                                                                                                                                                                                                                                                                                                                                                                                                                                                                                                                                                                                                                                                                                                                                                                                                                                                                                                                                                              | 1.335079000  | 0.590912000  |              |              |   |              |              |              |   |              |             |              |   |              |              |              |   |              |              |              |   |              |              |              |   |              |              |              |   |              |              |              |   |              |             |              |   |              |              |              |   |              |              |              |   |             |              |              |   |              |              |              |   |              |             |              |   |              |              |              |   |              |              |              |
| C                                                                                                                                                                                          | -0.303542000                                                                                                                                                                                                                                                                                                                                                                                                                                                                                                                                                                                                                                                                                                                                                                                                                                                                                                                                                                                                                                                                                                                                                                                                                                                                                                                                                                                             | 0.289991000  | 1.335542000  |              |              |   |              |              |              |   |              |             |              |   |              |              |              |   |              |              |              |   |              |              |              |   |              |              |              |   |              |              |              |   |              |             |              |   |              |              |              |   |              |              |              |   |             |              |              |   |              |              |              |   |              |             |              |   |              |              |              |   |              |              |              |
| C                                                                                                                                                                                          | -0.047379000                                                                                                                                                                                                                                                                                                                                                                                                                                                                                                                                                                                                                                                                                                                                                                                                                                                                                                                                                                                                                                                                                                                                                                                                                                                                                                                                                                                             | -1.051289000 | 0.983214000  |              |              |   |              |              |              |   |              |             |              |   |              |              |              |   |              |              |              |   |              |              |              |   |              |              |              |   |              |              |              |   |              |             |              |   |              |              |              |   |              |              |              |   |             |              |              |   |              |              |              |   |              |             |              |   |              |              |              |   |              |              |              |
| C                                                                                                                                                                                          | 0.775408000                                                                                                                                                                                                                                                                                                                                                                                                                                                                                                                                                                                                                                                                                                                                                                                                                                                                                                                                                                                                                                                                                                                                                                                                                                                                                                                                                                                              | -1.342538000 | -0.118394000 |              |              |   |              |              |              |   |              |             |              |   |              |              |              |   |              |              |              |   |              |              |              |   |              |              |              |   |              |              |              |   |              |             |              |   |              |              |              |   |              |              |              |   |             |              |              |   |              |              |              |   |              |             |              |   |              |              |              |   |              |              |              |
| H                                                                                                                                                                                          | 2.001221000                                                                                                                                                                                                                                                                                                                                                                                                                                                                                                                                                                                                                                                                                                                                                                                                                                                                                                                                                                                                                                                                                                                                                                                                                                                                                                                                                                                              | -0.525070000 | -1.697542000 |              |              |   |              |              |              |   |              |             |              |   |              |              |              |   |              |              |              |   |              |              |              |   |              |              |              |   |              |              |              |   |              |             |              |   |              |              |              |   |              |              |              |   |             |              |              |   |              |              |              |   |              |             |              |   |              |              |              |   |              |              |              |
| H                                                                                                                                                                                          | 1.561802000                                                                                                                                                                                                                                                                                                                                                                                                                                                                                                                                                                                                                                                                                                                                                                                                                                                                                                                                                                                                                                                                                                                                                                                                                                                                                                                                                                                              | 1.842568000  | -1.071208000 |              |              |   |              |              |              |   |              |             |              |   |              |              |              |   |              |              |              |   |              |              |              |   |              |              |              |   |              |              |              |   |              |             |              |   |              |              |              |   |              |              |              |   |             |              |              |   |              |              |              |   |              |             |              |   |              |              |              |   |              |              |              |
| H                                                                                                                                                                                          | 0.112099000                                                                                                                                                                                                                                                                                                                                                                                                                                                                                                                                                                                                                                                                                                                                                                                                                                                                                                                                                                                                                                                                                                                                                                                                                                                                                                                                                                                              | 2.367569000  | 0.886386000  |              |              |   |              |              |              |   |              |             |              |   |              |              |              |   |              |              |              |   |              |              |              |   |              |              |              |   |              |              |              |   |              |             |              |   |              |              |              |   |              |              |              |   |             |              |              |   |              |              |              |   |              |             |              |   |              |              |              |   |              |              |              |
| H                                                                                                                                                                                          | -0.907013000                                                                                                                                                                                                                                                                                                                                                                                                                                                                                                                                                                                                                                                                                                                                                                                                                                                                                                                                                                                                                                                                                                                                                                                                                                                                                                                                                                                             | 0.514683000  | 2.211487000  |              |              |   |              |              |              |   |              |             |              |   |              |              |              |   |              |              |              |   |              |              |              |   |              |              |              |   |              |              |              |   |              |             |              |   |              |              |              |   |              |              |              |   |             |              |              |   |              |              |              |   |              |             |              |   |              |              |              |   |              |              |              |
| H                                                                                                                                                                                          | -0.467332000                                                                                                                                                                                                                                                                                                                                                                                                                                                                                                                                                                                                                                                                                                                                                                                                                                                                                                                                                                                                                                                                                                                                                                                                                                                                                                                                                                                             | -1.855688000 | 1.582122000  |              |              |   |              |              |              |   |              |             |              |   |              |              |              |   |              |              |              |   |              |              |              |   |              |              |              |   |              |              |              |   |              |             |              |   |              |              |              |   |              |              |              |   |             |              |              |   |              |              |              |   |              |             |              |   |              |              |              |   |              |              |              |
| H                                                                                                                                                                                          | 0.998821000                                                                                                                                                                                                                                                                                                                                                                                                                                                                                                                                                                                                                                                                                                                                                                                                                                                                                                                                                                                                                                                                                                                                                                                                                                                                                                                                                                                              | -2.376030000 | -0.368776000 |              |              |   |              |              |              |   |              |             |              |   |              |              |              |   |              |              |              |   |              |              |              |   |              |              |              |   |              |              |              |   |              |             |              |   |              |              |              |   |              |              |              |   |             |              |              |   |              |              |              |   |              |             |              |   |              |              |              |   |              |              |              |
| H                                                                                                                                                                                          | -2.109088000                                                                                                                                                                                                                                                                                                                                                                                                                                                                                                                                                                                                                                                                                                                                                                                                                                                                                                                                                                                                                                                                                                                                                                                                                                                                                                                                                                                             | -0.808208000 | -1.374328000 |              |              |   |              |              |              |   |              |             |              |   |              |              |              |   |              |              |              |   |              |              |              |   |              |              |              |   |              |              |              |   |              |             |              |   |              |              |              |   |              |              |              |   |             |              |              |   |              |              |              |   |              |             |              |   |              |              |              |   |              |              |              |
| O                                                                                                                                                                                          | -2.095234000                                                                                                                                                                                                                                                                                                                                                                                                                                                                                                                                                                                                                                                                                                                                                                                                                                                                                                                                                                                                                                                                                                                                                                                                                                                                                                                                                                                             | 0.033140000  | -0.884176000 |              |              |   |              |              |              |   |              |             |              |   |              |              |              |   |              |              |              |   |              |              |              |   |              |              |              |   |              |              |              |   |              |             |              |   |              |              |              |   |              |              |              |   |             |              |              |   |              |              |              |   |              |             |              |   |              |              |              |   |              |              |              |
| H                                                                                                                                                                                          | -1.410313000                                                                                                                                                                                                                                                                                                                                                                                                                                                                                                                                                                                                                                                                                                                                                                                                                                                                                                                                                                                                                                                                                                                                                                                                                                                                                                                                                                                             | -0.007211000 | -0.113851000 |              |              |   |              |              |              |   |              |             |              |   |              |              |              |   |              |              |              |   |              |              |              |   |              |              |              |   |              |              |              |   |              |             |              |   |              |              |              |   |              |              |              |   |             |              |              |   |              |              |              |   |              |             |              |   |              |              |              |   |              |              |              |
| H                                                                                                                                                                                          | -1.871696000                                                                                                                                                                                                                                                                                                                                                                                                                                                                                                                                                                                                                                                                                                                                                                                                                                                                                                                                                                                                                                                                                                                                                                                                                                                                                                                                                                                             | 0.762967000  | -1.489339000 |              |              |   |              |              |              |   |              |             |              |   |              |              |              |   |              |              |              |   |              |              |              |   |              |              |              |   |              |              |              |   |              |             |              |   |              |              |              |   |              |              |              |   |             |              |              |   |              |              |              |   |              |             |              |   |              |              |              |   |              |              |              |
|  <p style="text-align: center;"><b>BzH<sup>+</sup>-W<sub>1c</sub></b><br/><b>[-308.17599132814]</b></p> | <table border="1"> <tbody> <tr><td>C</td><td>-0.119699000</td><td>0.456473000</td><td>1.410599000</td></tr> <tr><td>C</td><td>-0.442209000</td><td>1.376305000</td><td>0.396950000</td></tr> <tr><td>C</td><td>-0.864793000</td><td>0.916272000</td><td>-0.865472000</td></tr> <tr><td>C</td><td>-0.943067000</td><td>-0.461104000</td><td>-1.120644000</td></tr> <tr><td>C</td><td>-0.596409000</td><td>-1.381719000</td><td>-0.114889000</td></tr> <tr><td>C</td><td>-0.188498000</td><td>-0.923646000</td><td>1.151871000</td></tr> <tr><td>H</td><td>0.162688000</td><td>0.811455000</td><td>2.397930000</td></tr> <tr><td>H</td><td>-0.427305000</td><td>2.442680000</td><td>0.608606000</td></tr> <tr><td>H</td><td>-1.160490000</td><td>1.629402000</td><td>-1.630422000</td></tr> <tr><td>H</td><td>-1.300751000</td><td>-0.817383000</td><td>-2.082824000</td></tr> <tr><td>H</td><td>-0.693990000</td><td>-2.448852000</td><td>-0.298624000</td></tr> <tr><td>H</td><td>0.031811000</td><td>-1.636159000</td><td>1.942474000</td></tr> <tr><td>H</td><td>2.380854000</td><td>-0.009447000</td><td>-1.439802000</td></tr> <tr><td>O</td><td>2.111873000</td><td>0.013888000</td><td>-0.503072000</td></tr> <tr><td>H</td><td>1.508887000</td><td>0.787993000</td><td>-0.334128000</td></tr> <tr><td>H</td><td>1.531355000</td><td>-0.766280000</td><td>-0.289129000</td></tr> </tbody> </table> | C            | -0.119699000 | 0.456473000  | 1.410599000  | C | -0.442209000 | 1.376305000  | 0.396950000  | C | -0.864793000 | 0.916272000 | -0.865472000 | C | -0.943067000 | -0.461104000 | -1.120644000 | C | -0.596409000 | -1.381719000 | -0.114889000 | C | -0.188498000 | -0.923646000 | 1.151871000  | H | 0.162688000  | 0.811455000  | 2.397930000  | H | -0.427305000 | 2.442680000  | 0.608606000  | H | -1.160490000 | 1.629402000 | -1.630422000 | H | -1.300751000 | -0.817383000 | -2.082824000 | H | -0.693990000 | -2.448852000 | -0.298624000 | H | 0.031811000 | -1.636159000 | 1.942474000  | H | 2.380854000  | -0.009447000 | -1.439802000 | O | 2.111873000  | 0.013888000 | -0.503072000 | H | 1.508887000  | 0.787993000  | -0.334128000 | H | 1.531355000  | -0.766280000 | -0.289129000 |
| C                                                                                                                                                                                          | -0.119699000                                                                                                                                                                                                                                                                                                                                                                                                                                                                                                                                                                                                                                                                                                                                                                                                                                                                                                                                                                                                                                                                                                                                                                                                                                                                                                                                                                                             | 0.456473000  | 1.410599000  |              |              |   |              |              |              |   |              |             |              |   |              |              |              |   |              |              |              |   |              |              |              |   |              |              |              |   |              |              |              |   |              |             |              |   |              |              |              |   |              |              |              |   |             |              |              |   |              |              |              |   |              |             |              |   |              |              |              |   |              |              |              |
| C                                                                                                                                                                                          | -0.442209000                                                                                                                                                                                                                                                                                                                                                                                                                                                                                                                                                                                                                                                                                                                                                                                                                                                                                                                                                                                                                                                                                                                                                                                                                                                                                                                                                                                             | 1.376305000  | 0.396950000  |              |              |   |              |              |              |   |              |             |              |   |              |              |              |   |              |              |              |   |              |              |              |   |              |              |              |   |              |              |              |   |              |             |              |   |              |              |              |   |              |              |              |   |             |              |              |   |              |              |              |   |              |             |              |   |              |              |              |   |              |              |              |
| C                                                                                                                                                                                          | -0.864793000                                                                                                                                                                                                                                                                                                                                                                                                                                                                                                                                                                                                                                                                                                                                                                                                                                                                                                                                                                                                                                                                                                                                                                                                                                                                                                                                                                                             | 0.916272000  | -0.865472000 |              |              |   |              |              |              |   |              |             |              |   |              |              |              |   |              |              |              |   |              |              |              |   |              |              |              |   |              |              |              |   |              |             |              |   |              |              |              |   |              |              |              |   |             |              |              |   |              |              |              |   |              |             |              |   |              |              |              |   |              |              |              |
| C                                                                                                                                                                                          | -0.943067000                                                                                                                                                                                                                                                                                                                                                                                                                                                                                                                                                                                                                                                                                                                                                                                                                                                                                                                                                                                                                                                                                                                                                                                                                                                                                                                                                                                             | -0.461104000 | -1.120644000 |              |              |   |              |              |              |   |              |             |              |   |              |              |              |   |              |              |              |   |              |              |              |   |              |              |              |   |              |              |              |   |              |             |              |   |              |              |              |   |              |              |              |   |             |              |              |   |              |              |              |   |              |             |              |   |              |              |              |   |              |              |              |
| C                                                                                                                                                                                          | -0.596409000                                                                                                                                                                                                                                                                                                                                                                                                                                                                                                                                                                                                                                                                                                                                                                                                                                                                                                                                                                                                                                                                                                                                                                                                                                                                                                                                                                                             | -1.381719000 | -0.114889000 |              |              |   |              |              |              |   |              |             |              |   |              |              |              |   |              |              |              |   |              |              |              |   |              |              |              |   |              |              |              |   |              |             |              |   |              |              |              |   |              |              |              |   |             |              |              |   |              |              |              |   |              |             |              |   |              |              |              |   |              |              |              |
| C                                                                                                                                                                                          | -0.188498000                                                                                                                                                                                                                                                                                                                                                                                                                                                                                                                                                                                                                                                                                                                                                                                                                                                                                                                                                                                                                                                                                                                                                                                                                                                                                                                                                                                             | -0.923646000 | 1.151871000  |              |              |   |              |              |              |   |              |             |              |   |              |              |              |   |              |              |              |   |              |              |              |   |              |              |              |   |              |              |              |   |              |             |              |   |              |              |              |   |              |              |              |   |             |              |              |   |              |              |              |   |              |             |              |   |              |              |              |   |              |              |              |
| H                                                                                                                                                                                          | 0.162688000                                                                                                                                                                                                                                                                                                                                                                                                                                                                                                                                                                                                                                                                                                                                                                                                                                                                                                                                                                                                                                                                                                                                                                                                                                                                                                                                                                                              | 0.811455000  | 2.397930000  |              |              |   |              |              |              |   |              |             |              |   |              |              |              |   |              |              |              |   |              |              |              |   |              |              |              |   |              |              |              |   |              |             |              |   |              |              |              |   |              |              |              |   |             |              |              |   |              |              |              |   |              |             |              |   |              |              |              |   |              |              |              |
| H                                                                                                                                                                                          | -0.427305000                                                                                                                                                                                                                                                                                                                                                                                                                                                                                                                                                                                                                                                                                                                                                                                                                                                                                                                                                                                                                                                                                                                                                                                                                                                                                                                                                                                             | 2.442680000  | 0.608606000  |              |              |   |              |              |              |   |              |             |              |   |              |              |              |   |              |              |              |   |              |              |              |   |              |              |              |   |              |              |              |   |              |             |              |   |              |              |              |   |              |              |              |   |             |              |              |   |              |              |              |   |              |             |              |   |              |              |              |   |              |              |              |
| H                                                                                                                                                                                          | -1.160490000                                                                                                                                                                                                                                                                                                                                                                                                                                                                                                                                                                                                                                                                                                                                                                                                                                                                                                                                                                                                                                                                                                                                                                                                                                                                                                                                                                                             | 1.629402000  | -1.630422000 |              |              |   |              |              |              |   |              |             |              |   |              |              |              |   |              |              |              |   |              |              |              |   |              |              |              |   |              |              |              |   |              |             |              |   |              |              |              |   |              |              |              |   |             |              |              |   |              |              |              |   |              |             |              |   |              |              |              |   |              |              |              |
| H                                                                                                                                                                                          | -1.300751000                                                                                                                                                                                                                                                                                                                                                                                                                                                                                                                                                                                                                                                                                                                                                                                                                                                                                                                                                                                                                                                                                                                                                                                                                                                                                                                                                                                             | -0.817383000 | -2.082824000 |              |              |   |              |              |              |   |              |             |              |   |              |              |              |   |              |              |              |   |              |              |              |   |              |              |              |   |              |              |              |   |              |             |              |   |              |              |              |   |              |              |              |   |             |              |              |   |              |              |              |   |              |             |              |   |              |              |              |   |              |              |              |
| H                                                                                                                                                                                          | -0.693990000                                                                                                                                                                                                                                                                                                                                                                                                                                                                                                                                                                                                                                                                                                                                                                                                                                                                                                                                                                                                                                                                                                                                                                                                                                                                                                                                                                                             | -2.448852000 | -0.298624000 |              |              |   |              |              |              |   |              |             |              |   |              |              |              |   |              |              |              |   |              |              |              |   |              |              |              |   |              |              |              |   |              |             |              |   |              |              |              |   |              |              |              |   |             |              |              |   |              |              |              |   |              |             |              |   |              |              |              |   |              |              |              |
| H                                                                                                                                                                                          | 0.031811000                                                                                                                                                                                                                                                                                                                                                                                                                                                                                                                                                                                                                                                                                                                                                                                                                                                                                                                                                                                                                                                                                                                                                                                                                                                                                                                                                                                              | -1.636159000 | 1.942474000  |              |              |   |              |              |              |   |              |             |              |   |              |              |              |   |              |              |              |   |              |              |              |   |              |              |              |   |              |              |              |   |              |             |              |   |              |              |              |   |              |              |              |   |             |              |              |   |              |              |              |   |              |             |              |   |              |              |              |   |              |              |              |
| H                                                                                                                                                                                          | 2.380854000                                                                                                                                                                                                                                                                                                                                                                                                                                                                                                                                                                                                                                                                                                                                                                                                                                                                                                                                                                                                                                                                                                                                                                                                                                                                                                                                                                                              | -0.009447000 | -1.439802000 |              |              |   |              |              |              |   |              |             |              |   |              |              |              |   |              |              |              |   |              |              |              |   |              |              |              |   |              |              |              |   |              |             |              |   |              |              |              |   |              |              |              |   |             |              |              |   |              |              |              |   |              |             |              |   |              |              |              |   |              |              |              |
| O                                                                                                                                                                                          | 2.111873000                                                                                                                                                                                                                                                                                                                                                                                                                                                                                                                                                                                                                                                                                                                                                                                                                                                                                                                                                                                                                                                                                                                                                                                                                                                                                                                                                                                              | 0.013888000  | -0.503072000 |              |              |   |              |              |              |   |              |             |              |   |              |              |              |   |              |              |              |   |              |              |              |   |              |              |              |   |              |              |              |   |              |             |              |   |              |              |              |   |              |              |              |   |             |              |              |   |              |              |              |   |              |             |              |   |              |              |              |   |              |              |              |
| H                                                                                                                                                                                          | 1.508887000                                                                                                                                                                                                                                                                                                                                                                                                                                                                                                                                                                                                                                                                                                                                                                                                                                                                                                                                                                                                                                                                                                                                                                                                                                                                                                                                                                                              | 0.787993000  | -0.334128000 |              |              |   |              |              |              |   |              |             |              |   |              |              |              |   |              |              |              |   |              |              |              |   |              |              |              |   |              |              |              |   |              |             |              |   |              |              |              |   |              |              |              |   |             |              |              |   |              |              |              |   |              |             |              |   |              |              |              |   |              |              |              |
| H                                                                                                                                                                                          | 1.531355000                                                                                                                                                                                                                                                                                                                                                                                                                                                                                                                                                                                                                                                                                                                                                                                                                                                                                                                                                                                                                                                                                                                                                                                                                                                                                                                                                                                              | -0.766280000 | -0.289129000 |              |              |   |              |              |              |   |              |             |              |   |              |              |              |   |              |              |              |   |              |              |              |   |              |              |              |   |              |              |              |   |              |             |              |   |              |              |              |   |              |              |              |   |             |              |              |   |              |              |              |   |              |             |              |   |              |              |              |   |              |              |              |
|  <p style="text-align: center;"><b>BzH<sup>+</sup>-W<sub>1d</sub></b><br/><b>[-308.17599132814]</b></p> | <table border="1"> <tbody> <tr><td>C</td><td>0.253159000</td><td>0.001749000</td><td>0.001040000</td></tr> <tr><td>C</td><td>-0.489321000</td><td>-0.045506000</td><td>-1.241685000</td></tr> <tr><td>C</td><td>-0.491180000</td><td>0.050104000</td><td>1.242608000</td></tr> <tr><td>H</td><td>0.063055000</td><td>-0.084521000</td><td>-2.177439000</td></tr> <tr><td>H</td><td>0.059750000</td><td>0.088778000</td><td>2.179229000</td></tr> <tr><td>C</td><td>-1.872546000</td><td>-0.044785000</td><td>-1.235670000</td></tr> <tr><td>C</td><td>-1.874390000</td><td>0.049684000</td><td>1.234482000</td></tr> <tr><td>H</td><td>-2.437253000</td><td>-0.080833000</td><td>-2.161331000</td></tr> </tbody> </table>                                                                                                                                                                                                                                                                                                                                                                                                                                                                                                                                                                                                                                                                                | C            | 0.253159000  | 0.001749000  | 0.001040000  | C | -0.489321000 | -0.045506000 | -1.241685000 | C | -0.491180000 | 0.050104000 | 1.242608000  | H | 0.063055000  | -0.084521000 | -2.177439000 | H | 0.059750000  | 0.088778000  | 2.179229000  | C | -1.872546000 | -0.044785000 | -1.235670000 | C | -1.874390000 | 0.049684000  | 1.234482000  | H | -2.437253000 | -0.080833000 | -2.161331000 |   |              |             |              |   |              |              |              |   |              |              |              |   |             |              |              |   |              |              |              |   |              |             |              |   |              |              |              |   |              |              |              |
| C                                                                                                                                                                                          | 0.253159000                                                                                                                                                                                                                                                                                                                                                                                                                                                                                                                                                                                                                                                                                                                                                                                                                                                                                                                                                                                                                                                                                                                                                                                                                                                                                                                                                                                              | 0.001749000  | 0.001040000  |              |              |   |              |              |              |   |              |             |              |   |              |              |              |   |              |              |              |   |              |              |              |   |              |              |              |   |              |              |              |   |              |             |              |   |              |              |              |   |              |              |              |   |             |              |              |   |              |              |              |   |              |             |              |   |              |              |              |   |              |              |              |
| C                                                                                                                                                                                          | -0.489321000                                                                                                                                                                                                                                                                                                                                                                                                                                                                                                                                                                                                                                                                                                                                                                                                                                                                                                                                                                                                                                                                                                                                                                                                                                                                                                                                                                                             | -0.045506000 | -1.241685000 |              |              |   |              |              |              |   |              |             |              |   |              |              |              |   |              |              |              |   |              |              |              |   |              |              |              |   |              |              |              |   |              |             |              |   |              |              |              |   |              |              |              |   |             |              |              |   |              |              |              |   |              |             |              |   |              |              |              |   |              |              |              |
| C                                                                                                                                                                                          | -0.491180000                                                                                                                                                                                                                                                                                                                                                                                                                                                                                                                                                                                                                                                                                                                                                                                                                                                                                                                                                                                                                                                                                                                                                                                                                                                                                                                                                                                             | 0.050104000  | 1.242608000  |              |              |   |              |              |              |   |              |             |              |   |              |              |              |   |              |              |              |   |              |              |              |   |              |              |              |   |              |              |              |   |              |             |              |   |              |              |              |   |              |              |              |   |             |              |              |   |              |              |              |   |              |             |              |   |              |              |              |   |              |              |              |
| H                                                                                                                                                                                          | 0.063055000                                                                                                                                                                                                                                                                                                                                                                                                                                                                                                                                                                                                                                                                                                                                                                                                                                                                                                                                                                                                                                                                                                                                                                                                                                                                                                                                                                                              | -0.084521000 | -2.177439000 |              |              |   |              |              |              |   |              |             |              |   |              |              |              |   |              |              |              |   |              |              |              |   |              |              |              |   |              |              |              |   |              |             |              |   |              |              |              |   |              |              |              |   |             |              |              |   |              |              |              |   |              |             |              |   |              |              |              |   |              |              |              |
| H                                                                                                                                                                                          | 0.059750000                                                                                                                                                                                                                                                                                                                                                                                                                                                                                                                                                                                                                                                                                                                                                                                                                                                                                                                                                                                                                                                                                                                                                                                                                                                                                                                                                                                              | 0.088778000  | 2.179229000  |              |              |   |              |              |              |   |              |             |              |   |              |              |              |   |              |              |              |   |              |              |              |   |              |              |              |   |              |              |              |   |              |             |              |   |              |              |              |   |              |              |              |   |             |              |              |   |              |              |              |   |              |             |              |   |              |              |              |   |              |              |              |
| C                                                                                                                                                                                          | -1.872546000                                                                                                                                                                                                                                                                                                                                                                                                                                                                                                                                                                                                                                                                                                                                                                                                                                                                                                                                                                                                                                                                                                                                                                                                                                                                                                                                                                                             | -0.044785000 | -1.235670000 |              |              |   |              |              |              |   |              |             |              |   |              |              |              |   |              |              |              |   |              |              |              |   |              |              |              |   |              |              |              |   |              |             |              |   |              |              |              |   |              |              |              |   |             |              |              |   |              |              |              |   |              |             |              |   |              |              |              |   |              |              |              |
| C                                                                                                                                                                                          | -1.874390000                                                                                                                                                                                                                                                                                                                                                                                                                                                                                                                                                                                                                                                                                                                                                                                                                                                                                                                                                                                                                                                                                                                                                                                                                                                                                                                                                                                             | 0.049684000  | 1.234482000  |              |              |   |              |              |              |   |              |             |              |   |              |              |              |   |              |              |              |   |              |              |              |   |              |              |              |   |              |              |              |   |              |             |              |   |              |              |              |   |              |              |              |   |             |              |              |   |              |              |              |   |              |             |              |   |              |              |              |   |              |              |              |
| H                                                                                                                                                                                          | -2.437253000                                                                                                                                                                                                                                                                                                                                                                                                                                                                                                                                                                                                                                                                                                                                                                                                                                                                                                                                                                                                                                                                                                                                                                                                                                                                                                                                                                                             | -0.080833000 | -2.161331000 |              |              |   |              |              |              |   |              |             |              |   |              |              |              |   |              |              |              |   |              |              |              |   |              |              |              |   |              |              |              |   |              |             |              |   |              |              |              |   |              |              |              |   |             |              |              |   |              |              |              |   |              |             |              |   |              |              |              |   |              |              |              |

|                                                                                                                                                                                            |                                                                                                                                                                                                                                                                                                                                                                                                                                                                                                                                                                                                                                                                                                                                                                                                                                                                                                                                                                                                                                                                                                                                                                                                                                                                                                                                                                                                                                                                                                                                                                                                                                                                                                                                                                                                                                                                                               |              |              |             |             |   |              |              |              |   |              |              |              |   |              |              |              |   |             |              |              |   |             |              |              |   |             |              |              |   |             |              |              |   |             |              |              |   |             |              |              |   |             |              |              |   |              |              |              |   |              |              |             |   |              |              |              |   |              |              |              |   |              |              |              |   |              |              |             |   |              |              |             |   |              |              |              |   |              |             |             |   |              |              |              |   |              |              |             |
|--------------------------------------------------------------------------------------------------------------------------------------------------------------------------------------------|-----------------------------------------------------------------------------------------------------------------------------------------------------------------------------------------------------------------------------------------------------------------------------------------------------------------------------------------------------------------------------------------------------------------------------------------------------------------------------------------------------------------------------------------------------------------------------------------------------------------------------------------------------------------------------------------------------------------------------------------------------------------------------------------------------------------------------------------------------------------------------------------------------------------------------------------------------------------------------------------------------------------------------------------------------------------------------------------------------------------------------------------------------------------------------------------------------------------------------------------------------------------------------------------------------------------------------------------------------------------------------------------------------------------------------------------------------------------------------------------------------------------------------------------------------------------------------------------------------------------------------------------------------------------------------------------------------------------------------------------------------------------------------------------------------------------------------------------------------------------------------------------------|--------------|--------------|-------------|-------------|---|--------------|--------------|--------------|---|--------------|--------------|--------------|---|--------------|--------------|--------------|---|-------------|--------------|--------------|---|-------------|--------------|--------------|---|-------------|--------------|--------------|---|-------------|--------------|--------------|---|-------------|--------------|--------------|---|-------------|--------------|--------------|---|-------------|--------------|--------------|---|--------------|--------------|--------------|---|--------------|--------------|-------------|---|--------------|--------------|--------------|---|--------------|--------------|--------------|---|--------------|--------------|--------------|---|--------------|--------------|-------------|---|--------------|--------------|-------------|---|--------------|--------------|--------------|---|--------------|-------------|-------------|---|--------------|--------------|--------------|---|--------------|--------------|-------------|
| <p style="text-align: center;">1.942</p> <p style="text-align: center;"><b>BzH<sup>+</sup>-W<sub>2a</sub></b><br/><b>[-384.4571672412]</b></p>                                             | <table border="0"> <tr><td>H</td><td>-2.440491000</td><td>0.086110000</td><td>2.159277000</td></tr> <tr><td>C</td><td>-2.549213000</td><td>0.002662000</td><td>-0.001113000</td></tr> <tr><td>H</td><td>-3.637530000</td><td>0.002884000</td><td>-0.001931000</td></tr> <tr><td>H</td><td>1.007456000</td><td>-0.831209000</td><td>0.027563000</td></tr> <tr><td>H</td><td>1.012294000</td><td>0.829869000</td><td>-0.024523000</td></tr> <tr><td>O</td><td>2.338719000</td><td>-2.243783000</td><td>0.035177000</td></tr> <tr><td>H</td><td>3.218942000</td><td>-2.231164000</td><td>-0.353055000</td></tr> <tr><td>H</td><td>2.251238000</td><td>-3.135246000</td><td>0.386702000</td></tr> <tr><td>H</td><td>2.270380000</td><td>3.126965000</td><td>-0.385643000</td></tr> <tr><td>H</td><td>3.233180000</td><td>2.218149000</td><td>0.354566000</td></tr> <tr><td>O</td><td>2.353771000</td><td>2.234629000</td><td>-0.035351000</td></tr> </table>                                                                                                                                                                                                                                                                                                                                                                                                                                                                                                                                                                                                                                                                                                                                                                                                                                                                                                                                      | H            | -2.440491000 | 0.086110000 | 2.159277000 | C | -2.549213000 | 0.002662000  | -0.001113000 | H | -3.637530000 | 0.002884000  | -0.001931000 | H | 1.007456000  | -0.831209000 | 0.027563000  | H | 1.012294000 | 0.829869000  | -0.024523000 | O | 2.338719000 | -2.243783000 | 0.035177000  | H | 3.218942000 | -2.231164000 | -0.353055000 | H | 2.251238000 | -3.135246000 | 0.386702000  | H | 2.270380000 | 3.126965000  | -0.385643000 | H | 3.233180000 | 2.218149000  | 0.354566000  | O | 2.353771000 | 2.234629000  | -0.035351000 |   |              |              |              |   |              |              |             |   |              |              |              |   |              |              |              |   |              |              |              |   |              |              |             |   |              |              |             |   |              |              |              |   |              |             |             |   |              |              |              |   |              |              |             |
| H                                                                                                                                                                                          | -2.440491000                                                                                                                                                                                                                                                                                                                                                                                                                                                                                                                                                                                                                                                                                                                                                                                                                                                                                                                                                                                                                                                                                                                                                                                                                                                                                                                                                                                                                                                                                                                                                                                                                                                                                                                                                                                                                                                                                  | 0.086110000  | 2.159277000  |             |             |   |              |              |              |   |              |              |              |   |              |              |              |   |             |              |              |   |             |              |              |   |             |              |              |   |             |              |              |   |             |              |              |   |             |              |              |   |             |              |              |   |              |              |              |   |              |              |             |   |              |              |              |   |              |              |              |   |              |              |              |   |              |              |             |   |              |              |             |   |              |              |              |   |              |             |             |   |              |              |              |   |              |              |             |
| C                                                                                                                                                                                          | -2.549213000                                                                                                                                                                                                                                                                                                                                                                                                                                                                                                                                                                                                                                                                                                                                                                                                                                                                                                                                                                                                                                                                                                                                                                                                                                                                                                                                                                                                                                                                                                                                                                                                                                                                                                                                                                                                                                                                                  | 0.002662000  | -0.001113000 |             |             |   |              |              |              |   |              |              |              |   |              |              |              |   |             |              |              |   |             |              |              |   |             |              |              |   |             |              |              |   |             |              |              |   |             |              |              |   |             |              |              |   |              |              |              |   |              |              |             |   |              |              |              |   |              |              |              |   |              |              |              |   |              |              |             |   |              |              |             |   |              |              |              |   |              |             |             |   |              |              |              |   |              |              |             |
| H                                                                                                                                                                                          | -3.637530000                                                                                                                                                                                                                                                                                                                                                                                                                                                                                                                                                                                                                                                                                                                                                                                                                                                                                                                                                                                                                                                                                                                                                                                                                                                                                                                                                                                                                                                                                                                                                                                                                                                                                                                                                                                                                                                                                  | 0.002884000  | -0.001931000 |             |             |   |              |              |              |   |              |              |              |   |              |              |              |   |             |              |              |   |             |              |              |   |             |              |              |   |             |              |              |   |             |              |              |   |             |              |              |   |             |              |              |   |              |              |              |   |              |              |             |   |              |              |              |   |              |              |              |   |              |              |              |   |              |              |             |   |              |              |             |   |              |              |              |   |              |             |             |   |              |              |              |   |              |              |             |
| H                                                                                                                                                                                          | 1.007456000                                                                                                                                                                                                                                                                                                                                                                                                                                                                                                                                                                                                                                                                                                                                                                                                                                                                                                                                                                                                                                                                                                                                                                                                                                                                                                                                                                                                                                                                                                                                                                                                                                                                                                                                                                                                                                                                                   | -0.831209000 | 0.027563000  |             |             |   |              |              |              |   |              |              |              |   |              |              |              |   |             |              |              |   |             |              |              |   |             |              |              |   |             |              |              |   |             |              |              |   |             |              |              |   |             |              |              |   |              |              |              |   |              |              |             |   |              |              |              |   |              |              |              |   |              |              |              |   |              |              |             |   |              |              |             |   |              |              |              |   |              |             |             |   |              |              |              |   |              |              |             |
| H                                                                                                                                                                                          | 1.012294000                                                                                                                                                                                                                                                                                                                                                                                                                                                                                                                                                                                                                                                                                                                                                                                                                                                                                                                                                                                                                                                                                                                                                                                                                                                                                                                                                                                                                                                                                                                                                                                                                                                                                                                                                                                                                                                                                   | 0.829869000  | -0.024523000 |             |             |   |              |              |              |   |              |              |              |   |              |              |              |   |             |              |              |   |             |              |              |   |             |              |              |   |             |              |              |   |             |              |              |   |             |              |              |   |             |              |              |   |              |              |              |   |              |              |             |   |              |              |              |   |              |              |              |   |              |              |              |   |              |              |             |   |              |              |             |   |              |              |              |   |              |             |             |   |              |              |              |   |              |              |             |
| O                                                                                                                                                                                          | 2.338719000                                                                                                                                                                                                                                                                                                                                                                                                                                                                                                                                                                                                                                                                                                                                                                                                                                                                                                                                                                                                                                                                                                                                                                                                                                                                                                                                                                                                                                                                                                                                                                                                                                                                                                                                                                                                                                                                                   | -2.243783000 | 0.035177000  |             |             |   |              |              |              |   |              |              |              |   |              |              |              |   |             |              |              |   |             |              |              |   |             |              |              |   |             |              |              |   |             |              |              |   |             |              |              |   |             |              |              |   |              |              |              |   |              |              |             |   |              |              |              |   |              |              |              |   |              |              |              |   |              |              |             |   |              |              |             |   |              |              |              |   |              |             |             |   |              |              |              |   |              |              |             |
| H                                                                                                                                                                                          | 3.218942000                                                                                                                                                                                                                                                                                                                                                                                                                                                                                                                                                                                                                                                                                                                                                                                                                                                                                                                                                                                                                                                                                                                                                                                                                                                                                                                                                                                                                                                                                                                                                                                                                                                                                                                                                                                                                                                                                   | -2.231164000 | -0.353055000 |             |             |   |              |              |              |   |              |              |              |   |              |              |              |   |             |              |              |   |             |              |              |   |             |              |              |   |             |              |              |   |             |              |              |   |             |              |              |   |             |              |              |   |              |              |              |   |              |              |             |   |              |              |              |   |              |              |              |   |              |              |              |   |              |              |             |   |              |              |             |   |              |              |              |   |              |             |             |   |              |              |              |   |              |              |             |
| H                                                                                                                                                                                          | 2.251238000                                                                                                                                                                                                                                                                                                                                                                                                                                                                                                                                                                                                                                                                                                                                                                                                                                                                                                                                                                                                                                                                                                                                                                                                                                                                                                                                                                                                                                                                                                                                                                                                                                                                                                                                                                                                                                                                                   | -3.135246000 | 0.386702000  |             |             |   |              |              |              |   |              |              |              |   |              |              |              |   |             |              |              |   |             |              |              |   |             |              |              |   |             |              |              |   |             |              |              |   |             |              |              |   |             |              |              |   |              |              |              |   |              |              |             |   |              |              |              |   |              |              |              |   |              |              |              |   |              |              |             |   |              |              |             |   |              |              |              |   |              |             |             |   |              |              |              |   |              |              |             |
| H                                                                                                                                                                                          | 2.270380000                                                                                                                                                                                                                                                                                                                                                                                                                                                                                                                                                                                                                                                                                                                                                                                                                                                                                                                                                                                                                                                                                                                                                                                                                                                                                                                                                                                                                                                                                                                                                                                                                                                                                                                                                                                                                                                                                   | 3.126965000  | -0.385643000 |             |             |   |              |              |              |   |              |              |              |   |              |              |              |   |             |              |              |   |             |              |              |   |             |              |              |   |             |              |              |   |             |              |              |   |             |              |              |   |             |              |              |   |              |              |              |   |              |              |             |   |              |              |              |   |              |              |              |   |              |              |              |   |              |              |             |   |              |              |             |   |              |              |              |   |              |             |             |   |              |              |              |   |              |              |             |
| H                                                                                                                                                                                          | 3.233180000                                                                                                                                                                                                                                                                                                                                                                                                                                                                                                                                                                                                                                                                                                                                                                                                                                                                                                                                                                                                                                                                                                                                                                                                                                                                                                                                                                                                                                                                                                                                                                                                                                                                                                                                                                                                                                                                                   | 2.218149000  | 0.354566000  |             |             |   |              |              |              |   |              |              |              |   |              |              |              |   |             |              |              |   |             |              |              |   |             |              |              |   |             |              |              |   |             |              |              |   |             |              |              |   |             |              |              |   |              |              |              |   |              |              |             |   |              |              |              |   |              |              |              |   |              |              |              |   |              |              |             |   |              |              |             |   |              |              |              |   |              |             |             |   |              |              |              |   |              |              |             |
| O                                                                                                                                                                                          | 2.353771000                                                                                                                                                                                                                                                                                                                                                                                                                                                                                                                                                                                                                                                                                                                                                                                                                                                                                                                                                                                                                                                                                                                                                                                                                                                                                                                                                                                                                                                                                                                                                                                                                                                                                                                                                                                                                                                                                   | 2.234629000  | -0.035351000 |             |             |   |              |              |              |   |              |              |              |   |              |              |              |   |             |              |              |   |             |              |              |   |             |              |              |   |             |              |              |   |             |              |              |   |             |              |              |   |             |              |              |   |              |              |              |   |              |              |             |   |              |              |              |   |              |              |              |   |              |              |              |   |              |              |             |   |              |              |             |   |              |              |              |   |              |             |             |   |              |              |              |   |              |              |             |
| 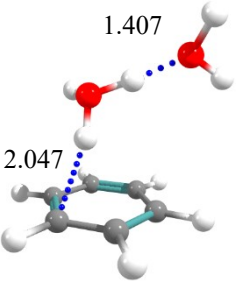 <p style="text-align: center;"><b>BzH<sup>+</sup>-W<sub>2b</sub></b><br/><b>[-384.49611131223]</b></p>   | <table border="0"> <tr><td>C</td><td>0.766966000</td><td>0.070789000</td><td>1.463294000</td></tr> <tr><td>C</td><td>0.382760000</td><td>1.250743000</td><td>0.803786000</td></tr> <tr><td>C</td><td>1.481892000</td><td>-0.920859000</td><td>0.767034000</td></tr> <tr><td>H</td><td>-0.126104000</td><td>2.036298000</td><td>1.356818000</td></tr> <tr><td>H</td><td>1.810640000</td><td>-1.817628000</td><td>1.285897000</td></tr> <tr><td>C</td><td>0.711011000</td><td>1.439122000</td><td>-0.546210000</td></tr> <tr><td>C</td><td>1.811627000</td><td>-0.728046000</td><td>-0.586788000</td></tr> <tr><td>H</td><td>0.442419000</td><td>2.365175000</td><td>-1.047615000</td></tr> <tr><td>H</td><td>2.395599000</td><td>-1.478390000</td><td>-1.113265000</td></tr> <tr><td>C</td><td>1.423433000</td><td>0.449586000</td><td>-1.241812000</td></tr> <tr><td>H</td><td>1.703537000</td><td>0.610556000</td><td>-2.279274000</td></tr> <tr><td>H</td><td>0.544343000</td><td>-0.063214000</td><td>2.518747000</td></tr> <tr><td>H</td><td>-0.471890000</td><td>-1.095065000</td><td>0.178735000</td></tr> <tr><td>O</td><td>-1.292695000</td><td>-1.355661000</td><td>-0.320479000</td></tr> <tr><td>H</td><td>-1.047732000</td><td>-1.473555000</td><td>-1.251336000</td></tr> <tr><td>H</td><td>-2.060851000</td><td>-0.643968000</td><td>-0.220267000</td></tr> <tr><td>H</td><td>-3.069463000</td><td>1.181495000</td><td>0.035835000</td></tr> <tr><td>H</td><td>-4.008353000</td><td>-0.040036000</td><td>0.218544000</td></tr> <tr><td>O</td><td>-3.154590000</td><td>0.236951000</td><td>-0.134352000</td></tr> </table>                                                                                                                                                                                                                                                       | C            | 0.766966000  | 0.070789000 | 1.463294000 | C | 0.382760000  | 1.250743000  | 0.803786000  | C | 1.481892000  | -0.920859000 | 0.767034000  | H | -0.126104000 | 2.036298000  | 1.356818000  | H | 1.810640000 | -1.817628000 | 1.285897000  | C | 0.711011000 | 1.439122000  | -0.546210000 | C | 1.811627000 | -0.728046000 | -0.586788000 | H | 0.442419000 | 2.365175000  | -1.047615000 | H | 2.395599000 | -1.478390000 | -1.113265000 | C | 1.423433000 | 0.449586000  | -1.241812000 | H | 1.703537000 | 0.610556000  | -2.279274000 | H | 0.544343000  | -0.063214000 | 2.518747000  | H | -0.471890000 | -1.095065000 | 0.178735000 | O | -1.292695000 | -1.355661000 | -0.320479000 | H | -1.047732000 | -1.473555000 | -1.251336000 | H | -2.060851000 | -0.643968000 | -0.220267000 | H | -3.069463000 | 1.181495000  | 0.035835000 | H | -4.008353000 | -0.040036000 | 0.218544000 | O | -3.154590000 | 0.236951000  | -0.134352000 |   |              |             |             |   |              |              |              |   |              |              |             |
| C                                                                                                                                                                                          | 0.766966000                                                                                                                                                                                                                                                                                                                                                                                                                                                                                                                                                                                                                                                                                                                                                                                                                                                                                                                                                                                                                                                                                                                                                                                                                                                                                                                                                                                                                                                                                                                                                                                                                                                                                                                                                                                                                                                                                   | 0.070789000  | 1.463294000  |             |             |   |              |              |              |   |              |              |              |   |              |              |              |   |             |              |              |   |             |              |              |   |             |              |              |   |             |              |              |   |             |              |              |   |             |              |              |   |             |              |              |   |              |              |              |   |              |              |             |   |              |              |              |   |              |              |              |   |              |              |              |   |              |              |             |   |              |              |             |   |              |              |              |   |              |             |             |   |              |              |              |   |              |              |             |
| C                                                                                                                                                                                          | 0.382760000                                                                                                                                                                                                                                                                                                                                                                                                                                                                                                                                                                                                                                                                                                                                                                                                                                                                                                                                                                                                                                                                                                                                                                                                                                                                                                                                                                                                                                                                                                                                                                                                                                                                                                                                                                                                                                                                                   | 1.250743000  | 0.803786000  |             |             |   |              |              |              |   |              |              |              |   |              |              |              |   |             |              |              |   |             |              |              |   |             |              |              |   |             |              |              |   |             |              |              |   |             |              |              |   |             |              |              |   |              |              |              |   |              |              |             |   |              |              |              |   |              |              |              |   |              |              |              |   |              |              |             |   |              |              |             |   |              |              |              |   |              |             |             |   |              |              |              |   |              |              |             |
| C                                                                                                                                                                                          | 1.481892000                                                                                                                                                                                                                                                                                                                                                                                                                                                                                                                                                                                                                                                                                                                                                                                                                                                                                                                                                                                                                                                                                                                                                                                                                                                                                                                                                                                                                                                                                                                                                                                                                                                                                                                                                                                                                                                                                   | -0.920859000 | 0.767034000  |             |             |   |              |              |              |   |              |              |              |   |              |              |              |   |             |              |              |   |             |              |              |   |             |              |              |   |             |              |              |   |             |              |              |   |             |              |              |   |             |              |              |   |              |              |              |   |              |              |             |   |              |              |              |   |              |              |              |   |              |              |              |   |              |              |             |   |              |              |             |   |              |              |              |   |              |             |             |   |              |              |              |   |              |              |             |
| H                                                                                                                                                                                          | -0.126104000                                                                                                                                                                                                                                                                                                                                                                                                                                                                                                                                                                                                                                                                                                                                                                                                                                                                                                                                                                                                                                                                                                                                                                                                                                                                                                                                                                                                                                                                                                                                                                                                                                                                                                                                                                                                                                                                                  | 2.036298000  | 1.356818000  |             |             |   |              |              |              |   |              |              |              |   |              |              |              |   |             |              |              |   |             |              |              |   |             |              |              |   |             |              |              |   |             |              |              |   |             |              |              |   |             |              |              |   |              |              |              |   |              |              |             |   |              |              |              |   |              |              |              |   |              |              |              |   |              |              |             |   |              |              |             |   |              |              |              |   |              |             |             |   |              |              |              |   |              |              |             |
| H                                                                                                                                                                                          | 1.810640000                                                                                                                                                                                                                                                                                                                                                                                                                                                                                                                                                                                                                                                                                                                                                                                                                                                                                                                                                                                                                                                                                                                                                                                                                                                                                                                                                                                                                                                                                                                                                                                                                                                                                                                                                                                                                                                                                   | -1.817628000 | 1.285897000  |             |             |   |              |              |              |   |              |              |              |   |              |              |              |   |             |              |              |   |             |              |              |   |             |              |              |   |             |              |              |   |             |              |              |   |             |              |              |   |             |              |              |   |              |              |              |   |              |              |             |   |              |              |              |   |              |              |              |   |              |              |              |   |              |              |             |   |              |              |             |   |              |              |              |   |              |             |             |   |              |              |              |   |              |              |             |
| C                                                                                                                                                                                          | 0.711011000                                                                                                                                                                                                                                                                                                                                                                                                                                                                                                                                                                                                                                                                                                                                                                                                                                                                                                                                                                                                                                                                                                                                                                                                                                                                                                                                                                                                                                                                                                                                                                                                                                                                                                                                                                                                                                                                                   | 1.439122000  | -0.546210000 |             |             |   |              |              |              |   |              |              |              |   |              |              |              |   |             |              |              |   |             |              |              |   |             |              |              |   |             |              |              |   |             |              |              |   |             |              |              |   |             |              |              |   |              |              |              |   |              |              |             |   |              |              |              |   |              |              |              |   |              |              |              |   |              |              |             |   |              |              |             |   |              |              |              |   |              |             |             |   |              |              |              |   |              |              |             |
| C                                                                                                                                                                                          | 1.811627000                                                                                                                                                                                                                                                                                                                                                                                                                                                                                                                                                                                                                                                                                                                                                                                                                                                                                                                                                                                                                                                                                                                                                                                                                                                                                                                                                                                                                                                                                                                                                                                                                                                                                                                                                                                                                                                                                   | -0.728046000 | -0.586788000 |             |             |   |              |              |              |   |              |              |              |   |              |              |              |   |             |              |              |   |             |              |              |   |             |              |              |   |             |              |              |   |             |              |              |   |             |              |              |   |             |              |              |   |              |              |              |   |              |              |             |   |              |              |              |   |              |              |              |   |              |              |              |   |              |              |             |   |              |              |             |   |              |              |              |   |              |             |             |   |              |              |              |   |              |              |             |
| H                                                                                                                                                                                          | 0.442419000                                                                                                                                                                                                                                                                                                                                                                                                                                                                                                                                                                                                                                                                                                                                                                                                                                                                                                                                                                                                                                                                                                                                                                                                                                                                                                                                                                                                                                                                                                                                                                                                                                                                                                                                                                                                                                                                                   | 2.365175000  | -1.047615000 |             |             |   |              |              |              |   |              |              |              |   |              |              |              |   |             |              |              |   |             |              |              |   |             |              |              |   |             |              |              |   |             |              |              |   |             |              |              |   |             |              |              |   |              |              |              |   |              |              |             |   |              |              |              |   |              |              |              |   |              |              |              |   |              |              |             |   |              |              |             |   |              |              |              |   |              |             |             |   |              |              |              |   |              |              |             |
| H                                                                                                                                                                                          | 2.395599000                                                                                                                                                                                                                                                                                                                                                                                                                                                                                                                                                                                                                                                                                                                                                                                                                                                                                                                                                                                                                                                                                                                                                                                                                                                                                                                                                                                                                                                                                                                                                                                                                                                                                                                                                                                                                                                                                   | -1.478390000 | -1.113265000 |             |             |   |              |              |              |   |              |              |              |   |              |              |              |   |             |              |              |   |             |              |              |   |             |              |              |   |             |              |              |   |             |              |              |   |             |              |              |   |             |              |              |   |              |              |              |   |              |              |             |   |              |              |              |   |              |              |              |   |              |              |              |   |              |              |             |   |              |              |             |   |              |              |              |   |              |             |             |   |              |              |              |   |              |              |             |
| C                                                                                                                                                                                          | 1.423433000                                                                                                                                                                                                                                                                                                                                                                                                                                                                                                                                                                                                                                                                                                                                                                                                                                                                                                                                                                                                                                                                                                                                                                                                                                                                                                                                                                                                                                                                                                                                                                                                                                                                                                                                                                                                                                                                                   | 0.449586000  | -1.241812000 |             |             |   |              |              |              |   |              |              |              |   |              |              |              |   |             |              |              |   |             |              |              |   |             |              |              |   |             |              |              |   |             |              |              |   |             |              |              |   |             |              |              |   |              |              |              |   |              |              |             |   |              |              |              |   |              |              |              |   |              |              |              |   |              |              |             |   |              |              |             |   |              |              |              |   |              |             |             |   |              |              |              |   |              |              |             |
| H                                                                                                                                                                                          | 1.703537000                                                                                                                                                                                                                                                                                                                                                                                                                                                                                                                                                                                                                                                                                                                                                                                                                                                                                                                                                                                                                                                                                                                                                                                                                                                                                                                                                                                                                                                                                                                                                                                                                                                                                                                                                                                                                                                                                   | 0.610556000  | -2.279274000 |             |             |   |              |              |              |   |              |              |              |   |              |              |              |   |             |              |              |   |             |              |              |   |             |              |              |   |             |              |              |   |             |              |              |   |             |              |              |   |             |              |              |   |              |              |              |   |              |              |             |   |              |              |              |   |              |              |              |   |              |              |              |   |              |              |             |   |              |              |             |   |              |              |              |   |              |             |             |   |              |              |              |   |              |              |             |
| H                                                                                                                                                                                          | 0.544343000                                                                                                                                                                                                                                                                                                                                                                                                                                                                                                                                                                                                                                                                                                                                                                                                                                                                                                                                                                                                                                                                                                                                                                                                                                                                                                                                                                                                                                                                                                                                                                                                                                                                                                                                                                                                                                                                                   | -0.063214000 | 2.518747000  |             |             |   |              |              |              |   |              |              |              |   |              |              |              |   |             |              |              |   |             |              |              |   |             |              |              |   |             |              |              |   |             |              |              |   |             |              |              |   |             |              |              |   |              |              |              |   |              |              |             |   |              |              |              |   |              |              |              |   |              |              |              |   |              |              |             |   |              |              |             |   |              |              |              |   |              |             |             |   |              |              |              |   |              |              |             |
| H                                                                                                                                                                                          | -0.471890000                                                                                                                                                                                                                                                                                                                                                                                                                                                                                                                                                                                                                                                                                                                                                                                                                                                                                                                                                                                                                                                                                                                                                                                                                                                                                                                                                                                                                                                                                                                                                                                                                                                                                                                                                                                                                                                                                  | -1.095065000 | 0.178735000  |             |             |   |              |              |              |   |              |              |              |   |              |              |              |   |             |              |              |   |             |              |              |   |             |              |              |   |             |              |              |   |             |              |              |   |             |              |              |   |             |              |              |   |              |              |              |   |              |              |             |   |              |              |              |   |              |              |              |   |              |              |              |   |              |              |             |   |              |              |             |   |              |              |              |   |              |             |             |   |              |              |              |   |              |              |             |
| O                                                                                                                                                                                          | -1.292695000                                                                                                                                                                                                                                                                                                                                                                                                                                                                                                                                                                                                                                                                                                                                                                                                                                                                                                                                                                                                                                                                                                                                                                                                                                                                                                                                                                                                                                                                                                                                                                                                                                                                                                                                                                                                                                                                                  | -1.355661000 | -0.320479000 |             |             |   |              |              |              |   |              |              |              |   |              |              |              |   |             |              |              |   |             |              |              |   |             |              |              |   |             |              |              |   |             |              |              |   |             |              |              |   |             |              |              |   |              |              |              |   |              |              |             |   |              |              |              |   |              |              |              |   |              |              |              |   |              |              |             |   |              |              |             |   |              |              |              |   |              |             |             |   |              |              |              |   |              |              |             |
| H                                                                                                                                                                                          | -1.047732000                                                                                                                                                                                                                                                                                                                                                                                                                                                                                                                                                                                                                                                                                                                                                                                                                                                                                                                                                                                                                                                                                                                                                                                                                                                                                                                                                                                                                                                                                                                                                                                                                                                                                                                                                                                                                                                                                  | -1.473555000 | -1.251336000 |             |             |   |              |              |              |   |              |              |              |   |              |              |              |   |             |              |              |   |             |              |              |   |             |              |              |   |             |              |              |   |             |              |              |   |             |              |              |   |             |              |              |   |              |              |              |   |              |              |             |   |              |              |              |   |              |              |              |   |              |              |              |   |              |              |             |   |              |              |             |   |              |              |              |   |              |             |             |   |              |              |              |   |              |              |             |
| H                                                                                                                                                                                          | -2.060851000                                                                                                                                                                                                                                                                                                                                                                                                                                                                                                                                                                                                                                                                                                                                                                                                                                                                                                                                                                                                                                                                                                                                                                                                                                                                                                                                                                                                                                                                                                                                                                                                                                                                                                                                                                                                                                                                                  | -0.643968000 | -0.220267000 |             |             |   |              |              |              |   |              |              |              |   |              |              |              |   |             |              |              |   |             |              |              |   |             |              |              |   |             |              |              |   |             |              |              |   |             |              |              |   |             |              |              |   |              |              |              |   |              |              |             |   |              |              |              |   |              |              |              |   |              |              |              |   |              |              |             |   |              |              |             |   |              |              |              |   |              |             |             |   |              |              |              |   |              |              |             |
| H                                                                                                                                                                                          | -3.069463000                                                                                                                                                                                                                                                                                                                                                                                                                                                                                                                                                                                                                                                                                                                                                                                                                                                                                                                                                                                                                                                                                                                                                                                                                                                                                                                                                                                                                                                                                                                                                                                                                                                                                                                                                                                                                                                                                  | 1.181495000  | 0.035835000  |             |             |   |              |              |              |   |              |              |              |   |              |              |              |   |             |              |              |   |             |              |              |   |             |              |              |   |             |              |              |   |             |              |              |   |             |              |              |   |             |              |              |   |              |              |              |   |              |              |             |   |              |              |              |   |              |              |              |   |              |              |              |   |              |              |             |   |              |              |             |   |              |              |              |   |              |             |             |   |              |              |              |   |              |              |             |
| H                                                                                                                                                                                          | -4.008353000                                                                                                                                                                                                                                                                                                                                                                                                                                                                                                                                                                                                                                                                                                                                                                                                                                                                                                                                                                                                                                                                                                                                                                                                                                                                                                                                                                                                                                                                                                                                                                                                                                                                                                                                                                                                                                                                                  | -0.040036000 | 0.218544000  |             |             |   |              |              |              |   |              |              |              |   |              |              |              |   |             |              |              |   |             |              |              |   |             |              |              |   |             |              |              |   |             |              |              |   |             |              |              |   |             |              |              |   |              |              |              |   |              |              |             |   |              |              |              |   |              |              |              |   |              |              |              |   |              |              |             |   |              |              |             |   |              |              |              |   |              |             |             |   |              |              |              |   |              |              |             |
| O                                                                                                                                                                                          | -3.154590000                                                                                                                                                                                                                                                                                                                                                                                                                                                                                                                                                                                                                                                                                                                                                                                                                                                                                                                                                                                                                                                                                                                                                                                                                                                                                                                                                                                                                                                                                                                                                                                                                                                                                                                                                                                                                                                                                  | 0.236951000  | -0.134352000 |             |             |   |              |              |              |   |              |              |              |   |              |              |              |   |             |              |              |   |             |              |              |   |             |              |              |   |             |              |              |   |             |              |              |   |             |              |              |   |             |              |              |   |              |              |              |   |              |              |             |   |              |              |              |   |              |              |              |   |              |              |              |   |              |              |             |   |              |              |             |   |              |              |              |   |              |             |             |   |              |              |              |   |              |              |             |
|  <p style="text-align: center;"><b>BzH<sup>+</sup>-W<sub>3a</sub></b><br/><b>[-460.75522639266]</b></p> | <table border="0"> <tr><td>C</td><td>0.538921000</td><td>0.000328000</td><td>0.001663000</td></tr> <tr><td>C</td><td>1.268980000</td><td>-0.062415000</td><td>-1.238030000</td></tr> <tr><td>C</td><td>1.271793000</td><td>0.062819000</td><td>1.239713000</td></tr> <tr><td>H</td><td>0.713609000</td><td>-0.109862000</td><td>-2.171417000</td></tr> <tr><td>H</td><td>0.718625000</td><td>0.110476000</td><td>2.174399000</td></tr> <tr><td>C</td><td>2.654195000</td><td>-0.062307000</td><td>-1.233169000</td></tr> <tr><td>C</td><td>2.656984000</td><td>0.062128000</td><td>1.231711000</td></tr> <tr><td>H</td><td>3.217173000</td><td>-0.109208000</td><td>-2.159444000</td></tr> <tr><td>H</td><td>3.222075000</td><td>0.108803000</td><td>2.156711000</td></tr> <tr><td>C</td><td>3.332680000</td><td>-0.000223000</td><td>-0.001497000</td></tr> <tr><td>H</td><td>4.420793000</td><td>-0.000447000</td><td>-0.002717000</td></tr> <tr><td>H</td><td>-0.269683000</td><td>0.791464000</td><td>-0.036833000</td></tr> <tr><td>H</td><td>-0.269610000</td><td>-0.790871000</td><td>0.041528000</td></tr> <tr><td>O</td><td>-1.853774000</td><td>1.746519000</td><td>-0.072191000</td></tr> <tr><td>H</td><td>-2.720004000</td><td>1.314319000</td><td>-0.055421000</td></tr> <tr><td>H</td><td>-2.036277000</td><td>2.689105000</td><td>-0.119143000</td></tr> <tr><td>H</td><td>-2.035842000</td><td>-2.688687000</td><td>0.124065000</td></tr> <tr><td>H</td><td>-2.719427000</td><td>-1.314050000</td><td>0.055865000</td></tr> <tr><td>O</td><td>-1.853265000</td><td>-1.746488000</td><td>0.070159000</td></tr> <tr><td>H</td><td>-4.767909000</td><td>0.033041000</td><td>0.758937000</td></tr> <tr><td>H</td><td>-4.767163000</td><td>-0.033952000</td><td>-0.758134000</td></tr> <tr><td>O</td><td>-4.173920000</td><td>-0.000294000</td><td>0.000689000</td></tr> </table> | C            | 0.538921000  | 0.000328000 | 0.001663000 | C | 1.268980000  | -0.062415000 | -1.238030000 | C | 1.271793000  | 0.062819000  | 1.239713000  | H | 0.713609000  | -0.109862000 | -2.171417000 | H | 0.718625000 | 0.110476000  | 2.174399000  | C | 2.654195000 | -0.062307000 | -1.233169000 | C | 2.656984000 | 0.062128000  | 1.231711000  | H | 3.217173000 | -0.109208000 | -2.159444000 | H | 3.222075000 | 0.108803000  | 2.156711000  | C | 3.332680000 | -0.000223000 | -0.001497000 | H | 4.420793000 | -0.000447000 | -0.002717000 | H | -0.269683000 | 0.791464000  | -0.036833000 | H | -0.269610000 | -0.790871000 | 0.041528000 | O | -1.853774000 | 1.746519000  | -0.072191000 | H | -2.720004000 | 1.314319000  | -0.055421000 | H | -2.036277000 | 2.689105000  | -0.119143000 | H | -2.035842000 | -2.688687000 | 0.124065000 | H | -2.719427000 | -1.314050000 | 0.055865000 | O | -1.853265000 | -1.746488000 | 0.070159000  | H | -4.767909000 | 0.033041000 | 0.758937000 | H | -4.767163000 | -0.033952000 | -0.758134000 | O | -4.173920000 | -0.000294000 | 0.000689000 |
| C                                                                                                                                                                                          | 0.538921000                                                                                                                                                                                                                                                                                                                                                                                                                                                                                                                                                                                                                                                                                                                                                                                                                                                                                                                                                                                                                                                                                                                                                                                                                                                                                                                                                                                                                                                                                                                                                                                                                                                                                                                                                                                                                                                                                   | 0.000328000  | 0.001663000  |             |             |   |              |              |              |   |              |              |              |   |              |              |              |   |             |              |              |   |             |              |              |   |             |              |              |   |             |              |              |   |             |              |              |   |             |              |              |   |             |              |              |   |              |              |              |   |              |              |             |   |              |              |              |   |              |              |              |   |              |              |              |   |              |              |             |   |              |              |             |   |              |              |              |   |              |             |             |   |              |              |              |   |              |              |             |
| C                                                                                                                                                                                          | 1.268980000                                                                                                                                                                                                                                                                                                                                                                                                                                                                                                                                                                                                                                                                                                                                                                                                                                                                                                                                                                                                                                                                                                                                                                                                                                                                                                                                                                                                                                                                                                                                                                                                                                                                                                                                                                                                                                                                                   | -0.062415000 | -1.238030000 |             |             |   |              |              |              |   |              |              |              |   |              |              |              |   |             |              |              |   |             |              |              |   |             |              |              |   |             |              |              |   |             |              |              |   |             |              |              |   |             |              |              |   |              |              |              |   |              |              |             |   |              |              |              |   |              |              |              |   |              |              |              |   |              |              |             |   |              |              |             |   |              |              |              |   |              |             |             |   |              |              |              |   |              |              |             |
| C                                                                                                                                                                                          | 1.271793000                                                                                                                                                                                                                                                                                                                                                                                                                                                                                                                                                                                                                                                                                                                                                                                                                                                                                                                                                                                                                                                                                                                                                                                                                                                                                                                                                                                                                                                                                                                                                                                                                                                                                                                                                                                                                                                                                   | 0.062819000  | 1.239713000  |             |             |   |              |              |              |   |              |              |              |   |              |              |              |   |             |              |              |   |             |              |              |   |             |              |              |   |             |              |              |   |             |              |              |   |             |              |              |   |             |              |              |   |              |              |              |   |              |              |             |   |              |              |              |   |              |              |              |   |              |              |              |   |              |              |             |   |              |              |             |   |              |              |              |   |              |             |             |   |              |              |              |   |              |              |             |
| H                                                                                                                                                                                          | 0.713609000                                                                                                                                                                                                                                                                                                                                                                                                                                                                                                                                                                                                                                                                                                                                                                                                                                                                                                                                                                                                                                                                                                                                                                                                                                                                                                                                                                                                                                                                                                                                                                                                                                                                                                                                                                                                                                                                                   | -0.109862000 | -2.171417000 |             |             |   |              |              |              |   |              |              |              |   |              |              |              |   |             |              |              |   |             |              |              |   |             |              |              |   |             |              |              |   |             |              |              |   |             |              |              |   |             |              |              |   |              |              |              |   |              |              |             |   |              |              |              |   |              |              |              |   |              |              |              |   |              |              |             |   |              |              |             |   |              |              |              |   |              |             |             |   |              |              |              |   |              |              |             |
| H                                                                                                                                                                                          | 0.718625000                                                                                                                                                                                                                                                                                                                                                                                                                                                                                                                                                                                                                                                                                                                                                                                                                                                                                                                                                                                                                                                                                                                                                                                                                                                                                                                                                                                                                                                                                                                                                                                                                                                                                                                                                                                                                                                                                   | 0.110476000  | 2.174399000  |             |             |   |              |              |              |   |              |              |              |   |              |              |              |   |             |              |              |   |             |              |              |   |             |              |              |   |             |              |              |   |             |              |              |   |             |              |              |   |             |              |              |   |              |              |              |   |              |              |             |   |              |              |              |   |              |              |              |   |              |              |              |   |              |              |             |   |              |              |             |   |              |              |              |   |              |             |             |   |              |              |              |   |              |              |             |
| C                                                                                                                                                                                          | 2.654195000                                                                                                                                                                                                                                                                                                                                                                                                                                                                                                                                                                                                                                                                                                                                                                                                                                                                                                                                                                                                                                                                                                                                                                                                                                                                                                                                                                                                                                                                                                                                                                                                                                                                                                                                                                                                                                                                                   | -0.062307000 | -1.233169000 |             |             |   |              |              |              |   |              |              |              |   |              |              |              |   |             |              |              |   |             |              |              |   |             |              |              |   |             |              |              |   |             |              |              |   |             |              |              |   |             |              |              |   |              |              |              |   |              |              |             |   |              |              |              |   |              |              |              |   |              |              |              |   |              |              |             |   |              |              |             |   |              |              |              |   |              |             |             |   |              |              |              |   |              |              |             |
| C                                                                                                                                                                                          | 2.656984000                                                                                                                                                                                                                                                                                                                                                                                                                                                                                                                                                                                                                                                                                                                                                                                                                                                                                                                                                                                                                                                                                                                                                                                                                                                                                                                                                                                                                                                                                                                                                                                                                                                                                                                                                                                                                                                                                   | 0.062128000  | 1.231711000  |             |             |   |              |              |              |   |              |              |              |   |              |              |              |   |             |              |              |   |             |              |              |   |             |              |              |   |             |              |              |   |             |              |              |   |             |              |              |   |             |              |              |   |              |              |              |   |              |              |             |   |              |              |              |   |              |              |              |   |              |              |              |   |              |              |             |   |              |              |             |   |              |              |              |   |              |             |             |   |              |              |              |   |              |              |             |
| H                                                                                                                                                                                          | 3.217173000                                                                                                                                                                                                                                                                                                                                                                                                                                                                                                                                                                                                                                                                                                                                                                                                                                                                                                                                                                                                                                                                                                                                                                                                                                                                                                                                                                                                                                                                                                                                                                                                                                                                                                                                                                                                                                                                                   | -0.109208000 | -2.159444000 |             |             |   |              |              |              |   |              |              |              |   |              |              |              |   |             |              |              |   |             |              |              |   |             |              |              |   |             |              |              |   |             |              |              |   |             |              |              |   |             |              |              |   |              |              |              |   |              |              |             |   |              |              |              |   |              |              |              |   |              |              |              |   |              |              |             |   |              |              |             |   |              |              |              |   |              |             |             |   |              |              |              |   |              |              |             |
| H                                                                                                                                                                                          | 3.222075000                                                                                                                                                                                                                                                                                                                                                                                                                                                                                                                                                                                                                                                                                                                                                                                                                                                                                                                                                                                                                                                                                                                                                                                                                                                                                                                                                                                                                                                                                                                                                                                                                                                                                                                                                                                                                                                                                   | 0.108803000  | 2.156711000  |             |             |   |              |              |              |   |              |              |              |   |              |              |              |   |             |              |              |   |             |              |              |   |             |              |              |   |             |              |              |   |             |              |              |   |             |              |              |   |             |              |              |   |              |              |              |   |              |              |             |   |              |              |              |   |              |              |              |   |              |              |              |   |              |              |             |   |              |              |             |   |              |              |              |   |              |             |             |   |              |              |              |   |              |              |             |
| C                                                                                                                                                                                          | 3.332680000                                                                                                                                                                                                                                                                                                                                                                                                                                                                                                                                                                                                                                                                                                                                                                                                                                                                                                                                                                                                                                                                                                                                                                                                                                                                                                                                                                                                                                                                                                                                                                                                                                                                                                                                                                                                                                                                                   | -0.000223000 | -0.001497000 |             |             |   |              |              |              |   |              |              |              |   |              |              |              |   |             |              |              |   |             |              |              |   |             |              |              |   |             |              |              |   |             |              |              |   |             |              |              |   |             |              |              |   |              |              |              |   |              |              |             |   |              |              |              |   |              |              |              |   |              |              |              |   |              |              |             |   |              |              |             |   |              |              |              |   |              |             |             |   |              |              |              |   |              |              |             |
| H                                                                                                                                                                                          | 4.420793000                                                                                                                                                                                                                                                                                                                                                                                                                                                                                                                                                                                                                                                                                                                                                                                                                                                                                                                                                                                                                                                                                                                                                                                                                                                                                                                                                                                                                                                                                                                                                                                                                                                                                                                                                                                                                                                                                   | -0.000447000 | -0.002717000 |             |             |   |              |              |              |   |              |              |              |   |              |              |              |   |             |              |              |   |             |              |              |   |             |              |              |   |             |              |              |   |             |              |              |   |             |              |              |   |             |              |              |   |              |              |              |   |              |              |             |   |              |              |              |   |              |              |              |   |              |              |              |   |              |              |             |   |              |              |             |   |              |              |              |   |              |             |             |   |              |              |              |   |              |              |             |
| H                                                                                                                                                                                          | -0.269683000                                                                                                                                                                                                                                                                                                                                                                                                                                                                                                                                                                                                                                                                                                                                                                                                                                                                                                                                                                                                                                                                                                                                                                                                                                                                                                                                                                                                                                                                                                                                                                                                                                                                                                                                                                                                                                                                                  | 0.791464000  | -0.036833000 |             |             |   |              |              |              |   |              |              |              |   |              |              |              |   |             |              |              |   |             |              |              |   |             |              |              |   |             |              |              |   |             |              |              |   |             |              |              |   |             |              |              |   |              |              |              |   |              |              |             |   |              |              |              |   |              |              |              |   |              |              |              |   |              |              |             |   |              |              |             |   |              |              |              |   |              |             |             |   |              |              |              |   |              |              |             |
| H                                                                                                                                                                                          | -0.269610000                                                                                                                                                                                                                                                                                                                                                                                                                                                                                                                                                                                                                                                                                                                                                                                                                                                                                                                                                                                                                                                                                                                                                                                                                                                                                                                                                                                                                                                                                                                                                                                                                                                                                                                                                                                                                                                                                  | -0.790871000 | 0.041528000  |             |             |   |              |              |              |   |              |              |              |   |              |              |              |   |             |              |              |   |             |              |              |   |             |              |              |   |             |              |              |   |             |              |              |   |             |              |              |   |             |              |              |   |              |              |              |   |              |              |             |   |              |              |              |   |              |              |              |   |              |              |              |   |              |              |             |   |              |              |             |   |              |              |              |   |              |             |             |   |              |              |              |   |              |              |             |
| O                                                                                                                                                                                          | -1.853774000                                                                                                                                                                                                                                                                                                                                                                                                                                                                                                                                                                                                                                                                                                                                                                                                                                                                                                                                                                                                                                                                                                                                                                                                                                                                                                                                                                                                                                                                                                                                                                                                                                                                                                                                                                                                                                                                                  | 1.746519000  | -0.072191000 |             |             |   |              |              |              |   |              |              |              |   |              |              |              |   |             |              |              |   |             |              |              |   |             |              |              |   |             |              |              |   |             |              |              |   |             |              |              |   |             |              |              |   |              |              |              |   |              |              |             |   |              |              |              |   |              |              |              |   |              |              |              |   |              |              |             |   |              |              |             |   |              |              |              |   |              |             |             |   |              |              |              |   |              |              |             |
| H                                                                                                                                                                                          | -2.720004000                                                                                                                                                                                                                                                                                                                                                                                                                                                                                                                                                                                                                                                                                                                                                                                                                                                                                                                                                                                                                                                                                                                                                                                                                                                                                                                                                                                                                                                                                                                                                                                                                                                                                                                                                                                                                                                                                  | 1.314319000  | -0.055421000 |             |             |   |              |              |              |   |              |              |              |   |              |              |              |   |             |              |              |   |             |              |              |   |             |              |              |   |             |              |              |   |             |              |              |   |             |              |              |   |             |              |              |   |              |              |              |   |              |              |             |   |              |              |              |   |              |              |              |   |              |              |              |   |              |              |             |   |              |              |             |   |              |              |              |   |              |             |             |   |              |              |              |   |              |              |             |
| H                                                                                                                                                                                          | -2.036277000                                                                                                                                                                                                                                                                                                                                                                                                                                                                                                                                                                                                                                                                                                                                                                                                                                                                                                                                                                                                                                                                                                                                                                                                                                                                                                                                                                                                                                                                                                                                                                                                                                                                                                                                                                                                                                                                                  | 2.689105000  | -0.119143000 |             |             |   |              |              |              |   |              |              |              |   |              |              |              |   |             |              |              |   |             |              |              |   |             |              |              |   |             |              |              |   |             |              |              |   |             |              |              |   |             |              |              |   |              |              |              |   |              |              |             |   |              |              |              |   |              |              |              |   |              |              |              |   |              |              |             |   |              |              |             |   |              |              |              |   |              |             |             |   |              |              |              |   |              |              |             |
| H                                                                                                                                                                                          | -2.035842000                                                                                                                                                                                                                                                                                                                                                                                                                                                                                                                                                                                                                                                                                                                                                                                                                                                                                                                                                                                                                                                                                                                                                                                                                                                                                                                                                                                                                                                                                                                                                                                                                                                                                                                                                                                                                                                                                  | -2.688687000 | 0.124065000  |             |             |   |              |              |              |   |              |              |              |   |              |              |              |   |             |              |              |   |             |              |              |   |             |              |              |   |             |              |              |   |             |              |              |   |             |              |              |   |             |              |              |   |              |              |              |   |              |              |             |   |              |              |              |   |              |              |              |   |              |              |              |   |              |              |             |   |              |              |             |   |              |              |              |   |              |             |             |   |              |              |              |   |              |              |             |
| H                                                                                                                                                                                          | -2.719427000                                                                                                                                                                                                                                                                                                                                                                                                                                                                                                                                                                                                                                                                                                                                                                                                                                                                                                                                                                                                                                                                                                                                                                                                                                                                                                                                                                                                                                                                                                                                                                                                                                                                                                                                                                                                                                                                                  | -1.314050000 | 0.055865000  |             |             |   |              |              |              |   |              |              |              |   |              |              |              |   |             |              |              |   |             |              |              |   |             |              |              |   |             |              |              |   |             |              |              |   |             |              |              |   |             |              |              |   |              |              |              |   |              |              |             |   |              |              |              |   |              |              |              |   |              |              |              |   |              |              |             |   |              |              |             |   |              |              |              |   |              |             |             |   |              |              |              |   |              |              |             |
| O                                                                                                                                                                                          | -1.853265000                                                                                                                                                                                                                                                                                                                                                                                                                                                                                                                                                                                                                                                                                                                                                                                                                                                                                                                                                                                                                                                                                                                                                                                                                                                                                                                                                                                                                                                                                                                                                                                                                                                                                                                                                                                                                                                                                  | -1.746488000 | 0.070159000  |             |             |   |              |              |              |   |              |              |              |   |              |              |              |   |             |              |              |   |             |              |              |   |             |              |              |   |             |              |              |   |             |              |              |   |             |              |              |   |             |              |              |   |              |              |              |   |              |              |             |   |              |              |              |   |              |              |              |   |              |              |              |   |              |              |             |   |              |              |             |   |              |              |              |   |              |             |             |   |              |              |              |   |              |              |             |
| H                                                                                                                                                                                          | -4.767909000                                                                                                                                                                                                                                                                                                                                                                                                                                                                                                                                                                                                                                                                                                                                                                                                                                                                                                                                                                                                                                                                                                                                                                                                                                                                                                                                                                                                                                                                                                                                                                                                                                                                                                                                                                                                                                                                                  | 0.033041000  | 0.758937000  |             |             |   |              |              |              |   |              |              |              |   |              |              |              |   |             |              |              |   |             |              |              |   |             |              |              |   |             |              |              |   |             |              |              |   |             |              |              |   |             |              |              |   |              |              |              |   |              |              |             |   |              |              |              |   |              |              |              |   |              |              |              |   |              |              |             |   |              |              |             |   |              |              |              |   |              |             |             |   |              |              |              |   |              |              |             |
| H                                                                                                                                                                                          | -4.767163000                                                                                                                                                                                                                                                                                                                                                                                                                                                                                                                                                                                                                                                                                                                                                                                                                                                                                                                                                                                                                                                                                                                                                                                                                                                                                                                                                                                                                                                                                                                                                                                                                                                                                                                                                                                                                                                                                  | -0.033952000 | -0.758134000 |             |             |   |              |              |              |   |              |              |              |   |              |              |              |   |             |              |              |   |             |              |              |   |             |              |              |   |             |              |              |   |             |              |              |   |             |              |              |   |             |              |              |   |              |              |              |   |              |              |             |   |              |              |              |   |              |              |              |   |              |              |              |   |              |              |             |   |              |              |             |   |              |              |              |   |              |             |             |   |              |              |              |   |              |              |             |
| O                                                                                                                                                                                          | -4.173920000                                                                                                                                                                                                                                                                                                                                                                                                                                                                                                                                                                                                                                                                                                                                                                                                                                                                                                                                                                                                                                                                                                                                                                                                                                                                                                                                                                                                                                                                                                                                                                                                                                                                                                                                                                                                                                                                                  | -0.000294000 | 0.000689000  |             |             |   |              |              |              |   |              |              |              |   |              |              |              |   |             |              |              |   |             |              |              |   |             |              |              |   |             |              |              |   |             |              |              |   |             |              |              |   |             |              |              |   |              |              |              |   |              |              |             |   |              |              |              |   |              |              |              |   |              |              |              |   |              |              |             |   |              |              |             |   |              |              |              |   |              |             |             |   |              |              |              |   |              |              |             |

|                                                                                                                                                                                          |                                                                                                                                                                                                                                                                                                                                                                                                                                                                                                                                                                                                                                                                                                                                                                                                                                                                                                                                                                                                                                                                                                                                                                                                                                                                                                                                                                                                                                                                                                                                                                                                                                                                                                                                                                                                                                                                                                                   |              |              |              |             |   |              |              |             |   |              |              |              |   |              |              |             |   |              |              |              |   |              |              |              |   |              |             |              |   |              |              |              |   |              |             |              |   |              |             |              |   |              |             |              |   |              |              |             |   |              |              |              |   |             |              |              |   |             |              |              |   |             |              |              |   |             |              |              |   |             |              |             |   |             |              |              |   |             |             |              |   |             |             |              |   |             |             |              |
|------------------------------------------------------------------------------------------------------------------------------------------------------------------------------------------|-------------------------------------------------------------------------------------------------------------------------------------------------------------------------------------------------------------------------------------------------------------------------------------------------------------------------------------------------------------------------------------------------------------------------------------------------------------------------------------------------------------------------------------------------------------------------------------------------------------------------------------------------------------------------------------------------------------------------------------------------------------------------------------------------------------------------------------------------------------------------------------------------------------------------------------------------------------------------------------------------------------------------------------------------------------------------------------------------------------------------------------------------------------------------------------------------------------------------------------------------------------------------------------------------------------------------------------------------------------------------------------------------------------------------------------------------------------------------------------------------------------------------------------------------------------------------------------------------------------------------------------------------------------------------------------------------------------------------------------------------------------------------------------------------------------------------------------------------------------------------------------------------------------------|--------------|--------------|--------------|-------------|---|--------------|--------------|-------------|---|--------------|--------------|--------------|---|--------------|--------------|-------------|---|--------------|--------------|--------------|---|--------------|--------------|--------------|---|--------------|-------------|--------------|---|--------------|--------------|--------------|---|--------------|-------------|--------------|---|--------------|-------------|--------------|---|--------------|-------------|--------------|---|--------------|--------------|-------------|---|--------------|--------------|--------------|---|-------------|--------------|--------------|---|-------------|--------------|--------------|---|-------------|--------------|--------------|---|-------------|--------------|--------------|---|-------------|--------------|-------------|---|-------------|--------------|--------------|---|-------------|-------------|--------------|---|-------------|-------------|--------------|---|-------------|-------------|--------------|
| 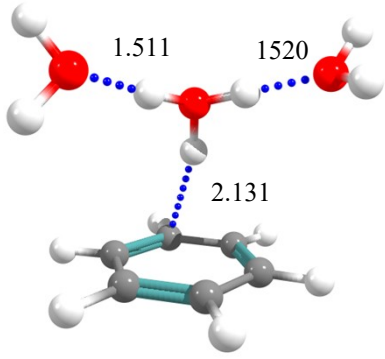 <p style="text-align: center;"><b>BzH<sup>+</sup>-W<sub>3b</sub></b><br/><b>[-460.8059125737]</b></p>  | <table border="0"> <tbody> <tr><td>C</td><td>-1.771563000</td><td>-1.011837000</td><td>0.438798000</td></tr> <tr><td>C</td><td>-1.698022000</td><td>0.131352000</td><td>1.252445000</td></tr> <tr><td>C</td><td>-1.476773000</td><td>-0.916494000</td><td>-0.928607000</td></tr> <tr><td>H</td><td>-1.956221000</td><td>0.067253000</td><td>2.306250000</td></tr> <tr><td>H</td><td>-1.576875000</td><td>-1.790627000</td><td>-1.567732000</td></tr> <tr><td>C</td><td>-1.333900000</td><td>1.368357000</td><td>0.692595000</td></tr> <tr><td>C</td><td>-1.109643000</td><td>0.317343000</td><td>-1.486948000</td></tr> <tr><td>H</td><td>-1.308480000</td><td>2.258473000</td><td>1.315749000</td></tr> <tr><td>H</td><td>-0.911238000</td><td>0.393215000</td><td>-2.552725000</td></tr> <tr><td>C</td><td>-1.039190000</td><td>1.459232000</td><td>-0.677355000</td></tr> <tr><td>H</td><td>-0.785628000</td><td>2.422014000</td><td>-1.112471000</td></tr> <tr><td>H</td><td>1.468353000</td><td>-1.076752000</td><td>0.480619000</td></tr> <tr><td>H</td><td>-2.089024000</td><td>-1.959414000</td><td>0.865901000</td></tr> <tr><td>O</td><td>1.367434000</td><td>-0.168010000</td><td>0.927666000</td></tr> <tr><td>H</td><td>1.877668000</td><td>0.558561000</td><td>0.434891000</td></tr> <tr><td>H</td><td>0.416155000</td><td>0.077265000</td><td>0.989444000</td></tr> <tr><td>H</td><td>1.045659000</td><td>-2.862252000</td><td>-0.699869000</td></tr> <tr><td>H</td><td>2.242493000</td><td>-3.106382000</td><td>0.237411000</td></tr> <tr><td>O</td><td>1.719439000</td><td>-2.412645000</td><td>-0.179434000</td></tr> <tr><td>O</td><td>2.656787000</td><td>1.702902000</td><td>-0.192930000</td></tr> <tr><td>H</td><td>3.402424000</td><td>2.121632000</td><td>0.250747000</td></tr> <tr><td>H</td><td>2.799978000</td><td>1.831325000</td><td>-1.136205000</td></tr> </tbody> </table>       | C            | -1.771563000 | -1.011837000 | 0.438798000 | C | -1.698022000 | 0.131352000  | 1.252445000 | C | -1.476773000 | -0.916494000 | -0.928607000 | H | -1.956221000 | 0.067253000  | 2.306250000 | H | -1.576875000 | -1.790627000 | -1.567732000 | C | -1.333900000 | 1.368357000  | 0.692595000  | C | -1.109643000 | 0.317343000 | -1.486948000 | H | -1.308480000 | 2.258473000  | 1.315749000  | H | -0.911238000 | 0.393215000 | -2.552725000 | C | -1.039190000 | 1.459232000 | -0.677355000 | H | -0.785628000 | 2.422014000 | -1.112471000 | H | 1.468353000  | -1.076752000 | 0.480619000 | H | -2.089024000 | -1.959414000 | 0.865901000  | O | 1.367434000 | -0.168010000 | 0.927666000  | H | 1.877668000 | 0.558561000  | 0.434891000  | H | 0.416155000 | 0.077265000  | 0.989444000  | H | 1.045659000 | -2.862252000 | -0.699869000 | H | 2.242493000 | -3.106382000 | 0.237411000 | O | 1.719439000 | -2.412645000 | -0.179434000 | O | 2.656787000 | 1.702902000 | -0.192930000 | H | 3.402424000 | 2.121632000 | 0.250747000  | H | 2.799978000 | 1.831325000 | -1.136205000 |
| C                                                                                                                                                                                        | -1.771563000                                                                                                                                                                                                                                                                                                                                                                                                                                                                                                                                                                                                                                                                                                                                                                                                                                                                                                                                                                                                                                                                                                                                                                                                                                                                                                                                                                                                                                                                                                                                                                                                                                                                                                                                                                                                                                                                                                      | -1.011837000 | 0.438798000  |              |             |   |              |              |             |   |              |              |              |   |              |              |             |   |              |              |              |   |              |              |              |   |              |             |              |   |              |              |              |   |              |             |              |   |              |             |              |   |              |             |              |   |              |              |             |   |              |              |              |   |             |              |              |   |             |              |              |   |             |              |              |   |             |              |              |   |             |              |             |   |             |              |              |   |             |             |              |   |             |             |              |   |             |             |              |
| C                                                                                                                                                                                        | -1.698022000                                                                                                                                                                                                                                                                                                                                                                                                                                                                                                                                                                                                                                                                                                                                                                                                                                                                                                                                                                                                                                                                                                                                                                                                                                                                                                                                                                                                                                                                                                                                                                                                                                                                                                                                                                                                                                                                                                      | 0.131352000  | 1.252445000  |              |             |   |              |              |             |   |              |              |              |   |              |              |             |   |              |              |              |   |              |              |              |   |              |             |              |   |              |              |              |   |              |             |              |   |              |             |              |   |              |             |              |   |              |              |             |   |              |              |              |   |             |              |              |   |             |              |              |   |             |              |              |   |             |              |              |   |             |              |             |   |             |              |              |   |             |             |              |   |             |             |              |   |             |             |              |
| C                                                                                                                                                                                        | -1.476773000                                                                                                                                                                                                                                                                                                                                                                                                                                                                                                                                                                                                                                                                                                                                                                                                                                                                                                                                                                                                                                                                                                                                                                                                                                                                                                                                                                                                                                                                                                                                                                                                                                                                                                                                                                                                                                                                                                      | -0.916494000 | -0.928607000 |              |             |   |              |              |             |   |              |              |              |   |              |              |             |   |              |              |              |   |              |              |              |   |              |             |              |   |              |              |              |   |              |             |              |   |              |             |              |   |              |             |              |   |              |              |             |   |              |              |              |   |             |              |              |   |             |              |              |   |             |              |              |   |             |              |              |   |             |              |             |   |             |              |              |   |             |             |              |   |             |             |              |   |             |             |              |
| H                                                                                                                                                                                        | -1.956221000                                                                                                                                                                                                                                                                                                                                                                                                                                                                                                                                                                                                                                                                                                                                                                                                                                                                                                                                                                                                                                                                                                                                                                                                                                                                                                                                                                                                                                                                                                                                                                                                                                                                                                                                                                                                                                                                                                      | 0.067253000  | 2.306250000  |              |             |   |              |              |             |   |              |              |              |   |              |              |             |   |              |              |              |   |              |              |              |   |              |             |              |   |              |              |              |   |              |             |              |   |              |             |              |   |              |             |              |   |              |              |             |   |              |              |              |   |             |              |              |   |             |              |              |   |             |              |              |   |             |              |              |   |             |              |             |   |             |              |              |   |             |             |              |   |             |             |              |   |             |             |              |
| H                                                                                                                                                                                        | -1.576875000                                                                                                                                                                                                                                                                                                                                                                                                                                                                                                                                                                                                                                                                                                                                                                                                                                                                                                                                                                                                                                                                                                                                                                                                                                                                                                                                                                                                                                                                                                                                                                                                                                                                                                                                                                                                                                                                                                      | -1.790627000 | -1.567732000 |              |             |   |              |              |             |   |              |              |              |   |              |              |             |   |              |              |              |   |              |              |              |   |              |             |              |   |              |              |              |   |              |             |              |   |              |             |              |   |              |             |              |   |              |              |             |   |              |              |              |   |             |              |              |   |             |              |              |   |             |              |              |   |             |              |              |   |             |              |             |   |             |              |              |   |             |             |              |   |             |             |              |   |             |             |              |
| C                                                                                                                                                                                        | -1.333900000                                                                                                                                                                                                                                                                                                                                                                                                                                                                                                                                                                                                                                                                                                                                                                                                                                                                                                                                                                                                                                                                                                                                                                                                                                                                                                                                                                                                                                                                                                                                                                                                                                                                                                                                                                                                                                                                                                      | 1.368357000  | 0.692595000  |              |             |   |              |              |             |   |              |              |              |   |              |              |             |   |              |              |              |   |              |              |              |   |              |             |              |   |              |              |              |   |              |             |              |   |              |             |              |   |              |             |              |   |              |              |             |   |              |              |              |   |             |              |              |   |             |              |              |   |             |              |              |   |             |              |              |   |             |              |             |   |             |              |              |   |             |             |              |   |             |             |              |   |             |             |              |
| C                                                                                                                                                                                        | -1.109643000                                                                                                                                                                                                                                                                                                                                                                                                                                                                                                                                                                                                                                                                                                                                                                                                                                                                                                                                                                                                                                                                                                                                                                                                                                                                                                                                                                                                                                                                                                                                                                                                                                                                                                                                                                                                                                                                                                      | 0.317343000  | -1.486948000 |              |             |   |              |              |             |   |              |              |              |   |              |              |             |   |              |              |              |   |              |              |              |   |              |             |              |   |              |              |              |   |              |             |              |   |              |             |              |   |              |             |              |   |              |              |             |   |              |              |              |   |             |              |              |   |             |              |              |   |             |              |              |   |             |              |              |   |             |              |             |   |             |              |              |   |             |             |              |   |             |             |              |   |             |             |              |
| H                                                                                                                                                                                        | -1.308480000                                                                                                                                                                                                                                                                                                                                                                                                                                                                                                                                                                                                                                                                                                                                                                                                                                                                                                                                                                                                                                                                                                                                                                                                                                                                                                                                                                                                                                                                                                                                                                                                                                                                                                                                                                                                                                                                                                      | 2.258473000  | 1.315749000  |              |             |   |              |              |             |   |              |              |              |   |              |              |             |   |              |              |              |   |              |              |              |   |              |             |              |   |              |              |              |   |              |             |              |   |              |             |              |   |              |             |              |   |              |              |             |   |              |              |              |   |             |              |              |   |             |              |              |   |             |              |              |   |             |              |              |   |             |              |             |   |             |              |              |   |             |             |              |   |             |             |              |   |             |             |              |
| H                                                                                                                                                                                        | -0.911238000                                                                                                                                                                                                                                                                                                                                                                                                                                                                                                                                                                                                                                                                                                                                                                                                                                                                                                                                                                                                                                                                                                                                                                                                                                                                                                                                                                                                                                                                                                                                                                                                                                                                                                                                                                                                                                                                                                      | 0.393215000  | -2.552725000 |              |             |   |              |              |             |   |              |              |              |   |              |              |             |   |              |              |              |   |              |              |              |   |              |             |              |   |              |              |              |   |              |             |              |   |              |             |              |   |              |             |              |   |              |              |             |   |              |              |              |   |             |              |              |   |             |              |              |   |             |              |              |   |             |              |              |   |             |              |             |   |             |              |              |   |             |             |              |   |             |             |              |   |             |             |              |
| C                                                                                                                                                                                        | -1.039190000                                                                                                                                                                                                                                                                                                                                                                                                                                                                                                                                                                                                                                                                                                                                                                                                                                                                                                                                                                                                                                                                                                                                                                                                                                                                                                                                                                                                                                                                                                                                                                                                                                                                                                                                                                                                                                                                                                      | 1.459232000  | -0.677355000 |              |             |   |              |              |             |   |              |              |              |   |              |              |             |   |              |              |              |   |              |              |              |   |              |             |              |   |              |              |              |   |              |             |              |   |              |             |              |   |              |             |              |   |              |              |             |   |              |              |              |   |             |              |              |   |             |              |              |   |             |              |              |   |             |              |              |   |             |              |             |   |             |              |              |   |             |             |              |   |             |             |              |   |             |             |              |
| H                                                                                                                                                                                        | -0.785628000                                                                                                                                                                                                                                                                                                                                                                                                                                                                                                                                                                                                                                                                                                                                                                                                                                                                                                                                                                                                                                                                                                                                                                                                                                                                                                                                                                                                                                                                                                                                                                                                                                                                                                                                                                                                                                                                                                      | 2.422014000  | -1.112471000 |              |             |   |              |              |             |   |              |              |              |   |              |              |             |   |              |              |              |   |              |              |              |   |              |             |              |   |              |              |              |   |              |             |              |   |              |             |              |   |              |             |              |   |              |              |             |   |              |              |              |   |             |              |              |   |             |              |              |   |             |              |              |   |             |              |              |   |             |              |             |   |             |              |              |   |             |             |              |   |             |             |              |   |             |             |              |
| H                                                                                                                                                                                        | 1.468353000                                                                                                                                                                                                                                                                                                                                                                                                                                                                                                                                                                                                                                                                                                                                                                                                                                                                                                                                                                                                                                                                                                                                                                                                                                                                                                                                                                                                                                                                                                                                                                                                                                                                                                                                                                                                                                                                                                       | -1.076752000 | 0.480619000  |              |             |   |              |              |             |   |              |              |              |   |              |              |             |   |              |              |              |   |              |              |              |   |              |             |              |   |              |              |              |   |              |             |              |   |              |             |              |   |              |             |              |   |              |              |             |   |              |              |              |   |             |              |              |   |             |              |              |   |             |              |              |   |             |              |              |   |             |              |             |   |             |              |              |   |             |             |              |   |             |             |              |   |             |             |              |
| H                                                                                                                                                                                        | -2.089024000                                                                                                                                                                                                                                                                                                                                                                                                                                                                                                                                                                                                                                                                                                                                                                                                                                                                                                                                                                                                                                                                                                                                                                                                                                                                                                                                                                                                                                                                                                                                                                                                                                                                                                                                                                                                                                                                                                      | -1.959414000 | 0.865901000  |              |             |   |              |              |             |   |              |              |              |   |              |              |             |   |              |              |              |   |              |              |              |   |              |             |              |   |              |              |              |   |              |             |              |   |              |             |              |   |              |             |              |   |              |              |             |   |              |              |              |   |             |              |              |   |             |              |              |   |             |              |              |   |             |              |              |   |             |              |             |   |             |              |              |   |             |             |              |   |             |             |              |   |             |             |              |
| O                                                                                                                                                                                        | 1.367434000                                                                                                                                                                                                                                                                                                                                                                                                                                                                                                                                                                                                                                                                                                                                                                                                                                                                                                                                                                                                                                                                                                                                                                                                                                                                                                                                                                                                                                                                                                                                                                                                                                                                                                                                                                                                                                                                                                       | -0.168010000 | 0.927666000  |              |             |   |              |              |             |   |              |              |              |   |              |              |             |   |              |              |              |   |              |              |              |   |              |             |              |   |              |              |              |   |              |             |              |   |              |             |              |   |              |             |              |   |              |              |             |   |              |              |              |   |             |              |              |   |             |              |              |   |             |              |              |   |             |              |              |   |             |              |             |   |             |              |              |   |             |             |              |   |             |             |              |   |             |             |              |
| H                                                                                                                                                                                        | 1.877668000                                                                                                                                                                                                                                                                                                                                                                                                                                                                                                                                                                                                                                                                                                                                                                                                                                                                                                                                                                                                                                                                                                                                                                                                                                                                                                                                                                                                                                                                                                                                                                                                                                                                                                                                                                                                                                                                                                       | 0.558561000  | 0.434891000  |              |             |   |              |              |             |   |              |              |              |   |              |              |             |   |              |              |              |   |              |              |              |   |              |             |              |   |              |              |              |   |              |             |              |   |              |             |              |   |              |             |              |   |              |              |             |   |              |              |              |   |             |              |              |   |             |              |              |   |             |              |              |   |             |              |              |   |             |              |             |   |             |              |              |   |             |             |              |   |             |             |              |   |             |             |              |
| H                                                                                                                                                                                        | 0.416155000                                                                                                                                                                                                                                                                                                                                                                                                                                                                                                                                                                                                                                                                                                                                                                                                                                                                                                                                                                                                                                                                                                                                                                                                                                                                                                                                                                                                                                                                                                                                                                                                                                                                                                                                                                                                                                                                                                       | 0.077265000  | 0.989444000  |              |             |   |              |              |             |   |              |              |              |   |              |              |             |   |              |              |              |   |              |              |              |   |              |             |              |   |              |              |              |   |              |             |              |   |              |             |              |   |              |             |              |   |              |              |             |   |              |              |              |   |             |              |              |   |             |              |              |   |             |              |              |   |             |              |              |   |             |              |             |   |             |              |              |   |             |             |              |   |             |             |              |   |             |             |              |
| H                                                                                                                                                                                        | 1.045659000                                                                                                                                                                                                                                                                                                                                                                                                                                                                                                                                                                                                                                                                                                                                                                                                                                                                                                                                                                                                                                                                                                                                                                                                                                                                                                                                                                                                                                                                                                                                                                                                                                                                                                                                                                                                                                                                                                       | -2.862252000 | -0.699869000 |              |             |   |              |              |             |   |              |              |              |   |              |              |             |   |              |              |              |   |              |              |              |   |              |             |              |   |              |              |              |   |              |             |              |   |              |             |              |   |              |             |              |   |              |              |             |   |              |              |              |   |             |              |              |   |             |              |              |   |             |              |              |   |             |              |              |   |             |              |             |   |             |              |              |   |             |             |              |   |             |             |              |   |             |             |              |
| H                                                                                                                                                                                        | 2.242493000                                                                                                                                                                                                                                                                                                                                                                                                                                                                                                                                                                                                                                                                                                                                                                                                                                                                                                                                                                                                                                                                                                                                                                                                                                                                                                                                                                                                                                                                                                                                                                                                                                                                                                                                                                                                                                                                                                       | -3.106382000 | 0.237411000  |              |             |   |              |              |             |   |              |              |              |   |              |              |             |   |              |              |              |   |              |              |              |   |              |             |              |   |              |              |              |   |              |             |              |   |              |             |              |   |              |             |              |   |              |              |             |   |              |              |              |   |             |              |              |   |             |              |              |   |             |              |              |   |             |              |              |   |             |              |             |   |             |              |              |   |             |             |              |   |             |             |              |   |             |             |              |
| O                                                                                                                                                                                        | 1.719439000                                                                                                                                                                                                                                                                                                                                                                                                                                                                                                                                                                                                                                                                                                                                                                                                                                                                                                                                                                                                                                                                                                                                                                                                                                                                                                                                                                                                                                                                                                                                                                                                                                                                                                                                                                                                                                                                                                       | -2.412645000 | -0.179434000 |              |             |   |              |              |             |   |              |              |              |   |              |              |             |   |              |              |              |   |              |              |              |   |              |             |              |   |              |              |              |   |              |             |              |   |              |             |              |   |              |             |              |   |              |              |             |   |              |              |              |   |             |              |              |   |             |              |              |   |             |              |              |   |             |              |              |   |             |              |             |   |             |              |              |   |             |             |              |   |             |             |              |   |             |             |              |
| O                                                                                                                                                                                        | 2.656787000                                                                                                                                                                                                                                                                                                                                                                                                                                                                                                                                                                                                                                                                                                                                                                                                                                                                                                                                                                                                                                                                                                                                                                                                                                                                                                                                                                                                                                                                                                                                                                                                                                                                                                                                                                                                                                                                                                       | 1.702902000  | -0.192930000 |              |             |   |              |              |             |   |              |              |              |   |              |              |             |   |              |              |              |   |              |              |              |   |              |             |              |   |              |              |              |   |              |             |              |   |              |             |              |   |              |             |              |   |              |              |             |   |              |              |              |   |             |              |              |   |             |              |              |   |             |              |              |   |             |              |              |   |             |              |             |   |             |              |              |   |             |             |              |   |             |             |              |   |             |             |              |
| H                                                                                                                                                                                        | 3.402424000                                                                                                                                                                                                                                                                                                                                                                                                                                                                                                                                                                                                                                                                                                                                                                                                                                                                                                                                                                                                                                                                                                                                                                                                                                                                                                                                                                                                                                                                                                                                                                                                                                                                                                                                                                                                                                                                                                       | 2.121632000  | 0.250747000  |              |             |   |              |              |             |   |              |              |              |   |              |              |             |   |              |              |              |   |              |              |              |   |              |             |              |   |              |              |              |   |              |             |              |   |              |             |              |   |              |             |              |   |              |              |             |   |              |              |              |   |             |              |              |   |             |              |              |   |             |              |              |   |             |              |              |   |             |              |             |   |             |              |              |   |             |             |              |   |             |             |              |   |             |             |              |
| H                                                                                                                                                                                        | 2.799978000                                                                                                                                                                                                                                                                                                                                                                                                                                                                                                                                                                                                                                                                                                                                                                                                                                                                                                                                                                                                                                                                                                                                                                                                                                                                                                                                                                                                                                                                                                                                                                                                                                                                                                                                                                                                                                                                                                       | 1.831325000  | -1.136205000 |              |             |   |              |              |             |   |              |              |              |   |              |              |             |   |              |              |              |   |              |              |              |   |              |             |              |   |              |              |              |   |              |             |              |   |              |             |              |   |              |             |              |   |              |              |             |   |              |              |              |   |             |              |              |   |             |              |              |   |             |              |              |   |             |              |              |   |             |              |             |   |             |              |              |   |             |             |              |   |             |             |              |   |             |             |              |
|  <p style="text-align: center;"><b>BzH<sup>+</sup>-W<sub>3c</sub></b><br/><b>[-460.7999350202]</b></p> | <table border="0"> <tbody> <tr><td>C</td><td>-1.791681000</td><td>-0.557001000</td><td>1.295853000</td></tr> <tr><td>C</td><td>-2.461113000</td><td>-1.056602000</td><td>0.166714000</td></tr> <tr><td>C</td><td>-1.299439000</td><td>0.758843000</td><td>1.295328000</td></tr> <tr><td>H</td><td>-2.863468000</td><td>-2.065762000</td><td>0.176542000</td></tr> <tr><td>H</td><td>-0.810644000</td><td>1.154842000</td><td>2.181544000</td></tr> <tr><td>C</td><td>-2.627102000</td><td>-0.244786000</td><td>-0.964967000</td></tr> <tr><td>C</td><td>-1.467473000</td><td>1.569425000</td><td>0.163560000</td></tr> <tr><td>H</td><td>-3.163769000</td><td>-0.624170000</td><td>-1.830130000</td></tr> <tr><td>H</td><td>-1.111195000</td><td>2.595914000</td><td>0.172833000</td></tr> <tr><td>C</td><td>-2.130959000</td><td>1.067274000</td><td>-0.965720000</td></tr> <tr><td>H</td><td>-2.286968000</td><td>1.705196000</td><td>-1.831785000</td></tr> <tr><td>H</td><td>-1.688948000</td><td>-1.175648000</td><td>2.183685000</td></tr> <tr><td>H</td><td>-0.091786000</td><td>-0.829023000</td><td>-0.131363000</td></tr> <tr><td>O</td><td>0.650206000</td><td>-0.947757000</td><td>-0.754341000</td></tr> <tr><td>H</td><td>0.425799000</td><td>-0.412112000</td><td>-1.524393000</td></tr> <tr><td>H</td><td>1.873628000</td><td>-0.961632000</td><td>-0.263597000</td></tr> <tr><td>H</td><td>3.280490000</td><td>-1.911204000</td><td>-0.003212000</td></tr> <tr><td>H</td><td>3.514297000</td><td>-0.300862000</td><td>0.054618000</td></tr> <tr><td>O</td><td>2.863357000</td><td>-1.062652000</td><td>0.190047000</td></tr> <tr><td>H</td><td>4.833863000</td><td>1.342569000</td><td>0.703513000</td></tr> <tr><td>H</td><td>5.023553000</td><td>1.121436000</td><td>-0.807727000</td></tr> <tr><td>O</td><td>4.452906000</td><td>0.902601000</td><td>-0.063847000</td></tr> </tbody> </table> | C            | -1.791681000 | -0.557001000 | 1.295853000 | C | -2.461113000 | -1.056602000 | 0.166714000 | C | -1.299439000 | 0.758843000  | 1.295328000  | H | -2.863468000 | -2.065762000 | 0.176542000 | H | -0.810644000 | 1.154842000  | 2.181544000  | C | -2.627102000 | -0.244786000 | -0.964967000 | C | -1.467473000 | 1.569425000 | 0.163560000  | H | -3.163769000 | -0.624170000 | -1.830130000 | H | -1.111195000 | 2.595914000 | 0.172833000  | C | -2.130959000 | 1.067274000 | -0.965720000 | H | -2.286968000 | 1.705196000 | -1.831785000 | H | -1.688948000 | -1.175648000 | 2.183685000 | H | -0.091786000 | -0.829023000 | -0.131363000 | O | 0.650206000 | -0.947757000 | -0.754341000 | H | 0.425799000 | -0.412112000 | -1.524393000 | H | 1.873628000 | -0.961632000 | -0.263597000 | H | 3.280490000 | -1.911204000 | -0.003212000 | H | 3.514297000 | -0.300862000 | 0.054618000 | O | 2.863357000 | -1.062652000 | 0.190047000  | H | 4.833863000 | 1.342569000 | 0.703513000  | H | 5.023553000 | 1.121436000 | -0.807727000 | O | 4.452906000 | 0.902601000 | -0.063847000 |
| C                                                                                                                                                                                        | -1.791681000                                                                                                                                                                                                                                                                                                                                                                                                                                                                                                                                                                                                                                                                                                                                                                                                                                                                                                                                                                                                                                                                                                                                                                                                                                                                                                                                                                                                                                                                                                                                                                                                                                                                                                                                                                                                                                                                                                      | -0.557001000 | 1.295853000  |              |             |   |              |              |             |   |              |              |              |   |              |              |             |   |              |              |              |   |              |              |              |   |              |             |              |   |              |              |              |   |              |             |              |   |              |             |              |   |              |             |              |   |              |              |             |   |              |              |              |   |             |              |              |   |             |              |              |   |             |              |              |   |             |              |              |   |             |              |             |   |             |              |              |   |             |             |              |   |             |             |              |   |             |             |              |
| C                                                                                                                                                                                        | -2.461113000                                                                                                                                                                                                                                                                                                                                                                                                                                                                                                                                                                                                                                                                                                                                                                                                                                                                                                                                                                                                                                                                                                                                                                                                                                                                                                                                                                                                                                                                                                                                                                                                                                                                                                                                                                                                                                                                                                      | -1.056602000 | 0.166714000  |              |             |   |              |              |             |   |              |              |              |   |              |              |             |   |              |              |              |   |              |              |              |   |              |             |              |   |              |              |              |   |              |             |              |   |              |             |              |   |              |             |              |   |              |              |             |   |              |              |              |   |             |              |              |   |             |              |              |   |             |              |              |   |             |              |              |   |             |              |             |   |             |              |              |   |             |             |              |   |             |             |              |   |             |             |              |
| C                                                                                                                                                                                        | -1.299439000                                                                                                                                                                                                                                                                                                                                                                                                                                                                                                                                                                                                                                                                                                                                                                                                                                                                                                                                                                                                                                                                                                                                                                                                                                                                                                                                                                                                                                                                                                                                                                                                                                                                                                                                                                                                                                                                                                      | 0.758843000  | 1.295328000  |              |             |   |              |              |             |   |              |              |              |   |              |              |             |   |              |              |              |   |              |              |              |   |              |             |              |   |              |              |              |   |              |             |              |   |              |             |              |   |              |             |              |   |              |              |             |   |              |              |              |   |             |              |              |   |             |              |              |   |             |              |              |   |             |              |              |   |             |              |             |   |             |              |              |   |             |             |              |   |             |             |              |   |             |             |              |
| H                                                                                                                                                                                        | -2.863468000                                                                                                                                                                                                                                                                                                                                                                                                                                                                                                                                                                                                                                                                                                                                                                                                                                                                                                                                                                                                                                                                                                                                                                                                                                                                                                                                                                                                                                                                                                                                                                                                                                                                                                                                                                                                                                                                                                      | -2.065762000 | 0.176542000  |              |             |   |              |              |             |   |              |              |              |   |              |              |             |   |              |              |              |   |              |              |              |   |              |             |              |   |              |              |              |   |              |             |              |   |              |             |              |   |              |             |              |   |              |              |             |   |              |              |              |   |             |              |              |   |             |              |              |   |             |              |              |   |             |              |              |   |             |              |             |   |             |              |              |   |             |             |              |   |             |             |              |   |             |             |              |
| H                                                                                                                                                                                        | -0.810644000                                                                                                                                                                                                                                                                                                                                                                                                                                                                                                                                                                                                                                                                                                                                                                                                                                                                                                                                                                                                                                                                                                                                                                                                                                                                                                                                                                                                                                                                                                                                                                                                                                                                                                                                                                                                                                                                                                      | 1.154842000  | 2.181544000  |              |             |   |              |              |             |   |              |              |              |   |              |              |             |   |              |              |              |   |              |              |              |   |              |             |              |   |              |              |              |   |              |             |              |   |              |             |              |   |              |             |              |   |              |              |             |   |              |              |              |   |             |              |              |   |             |              |              |   |             |              |              |   |             |              |              |   |             |              |             |   |             |              |              |   |             |             |              |   |             |             |              |   |             |             |              |
| C                                                                                                                                                                                        | -2.627102000                                                                                                                                                                                                                                                                                                                                                                                                                                                                                                                                                                                                                                                                                                                                                                                                                                                                                                                                                                                                                                                                                                                                                                                                                                                                                                                                                                                                                                                                                                                                                                                                                                                                                                                                                                                                                                                                                                      | -0.244786000 | -0.964967000 |              |             |   |              |              |             |   |              |              |              |   |              |              |             |   |              |              |              |   |              |              |              |   |              |             |              |   |              |              |              |   |              |             |              |   |              |             |              |   |              |             |              |   |              |              |             |   |              |              |              |   |             |              |              |   |             |              |              |   |             |              |              |   |             |              |              |   |             |              |             |   |             |              |              |   |             |             |              |   |             |             |              |   |             |             |              |
| C                                                                                                                                                                                        | -1.467473000                                                                                                                                                                                                                                                                                                                                                                                                                                                                                                                                                                                                                                                                                                                                                                                                                                                                                                                                                                                                                                                                                                                                                                                                                                                                                                                                                                                                                                                                                                                                                                                                                                                                                                                                                                                                                                                                                                      | 1.569425000  | 0.163560000  |              |             |   |              |              |             |   |              |              |              |   |              |              |             |   |              |              |              |   |              |              |              |   |              |             |              |   |              |              |              |   |              |             |              |   |              |             |              |   |              |             |              |   |              |              |             |   |              |              |              |   |             |              |              |   |             |              |              |   |             |              |              |   |             |              |              |   |             |              |             |   |             |              |              |   |             |             |              |   |             |             |              |   |             |             |              |
| H                                                                                                                                                                                        | -3.163769000                                                                                                                                                                                                                                                                                                                                                                                                                                                                                                                                                                                                                                                                                                                                                                                                                                                                                                                                                                                                                                                                                                                                                                                                                                                                                                                                                                                                                                                                                                                                                                                                                                                                                                                                                                                                                                                                                                      | -0.624170000 | -1.830130000 |              |             |   |              |              |             |   |              |              |              |   |              |              |             |   |              |              |              |   |              |              |              |   |              |             |              |   |              |              |              |   |              |             |              |   |              |             |              |   |              |             |              |   |              |              |             |   |              |              |              |   |             |              |              |   |             |              |              |   |             |              |              |   |             |              |              |   |             |              |             |   |             |              |              |   |             |             |              |   |             |             |              |   |             |             |              |
| H                                                                                                                                                                                        | -1.111195000                                                                                                                                                                                                                                                                                                                                                                                                                                                                                                                                                                                                                                                                                                                                                                                                                                                                                                                                                                                                                                                                                                                                                                                                                                                                                                                                                                                                                                                                                                                                                                                                                                                                                                                                                                                                                                                                                                      | 2.595914000  | 0.172833000  |              |             |   |              |              |             |   |              |              |              |   |              |              |             |   |              |              |              |   |              |              |              |   |              |             |              |   |              |              |              |   |              |             |              |   |              |             |              |   |              |             |              |   |              |              |             |   |              |              |              |   |             |              |              |   |             |              |              |   |             |              |              |   |             |              |              |   |             |              |             |   |             |              |              |   |             |             |              |   |             |             |              |   |             |             |              |
| C                                                                                                                                                                                        | -2.130959000                                                                                                                                                                                                                                                                                                                                                                                                                                                                                                                                                                                                                                                                                                                                                                                                                                                                                                                                                                                                                                                                                                                                                                                                                                                                                                                                                                                                                                                                                                                                                                                                                                                                                                                                                                                                                                                                                                      | 1.067274000  | -0.965720000 |              |             |   |              |              |             |   |              |              |              |   |              |              |             |   |              |              |              |   |              |              |              |   |              |             |              |   |              |              |              |   |              |             |              |   |              |             |              |   |              |             |              |   |              |              |             |   |              |              |              |   |             |              |              |   |             |              |              |   |             |              |              |   |             |              |              |   |             |              |             |   |             |              |              |   |             |             |              |   |             |             |              |   |             |             |              |
| H                                                                                                                                                                                        | -2.286968000                                                                                                                                                                                                                                                                                                                                                                                                                                                                                                                                                                                                                                                                                                                                                                                                                                                                                                                                                                                                                                                                                                                                                                                                                                                                                                                                                                                                                                                                                                                                                                                                                                                                                                                                                                                                                                                                                                      | 1.705196000  | -1.831785000 |              |             |   |              |              |             |   |              |              |              |   |              |              |             |   |              |              |              |   |              |              |              |   |              |             |              |   |              |              |              |   |              |             |              |   |              |             |              |   |              |             |              |   |              |              |             |   |              |              |              |   |             |              |              |   |             |              |              |   |             |              |              |   |             |              |              |   |             |              |             |   |             |              |              |   |             |             |              |   |             |             |              |   |             |             |              |
| H                                                                                                                                                                                        | -1.688948000                                                                                                                                                                                                                                                                                                                                                                                                                                                                                                                                                                                                                                                                                                                                                                                                                                                                                                                                                                                                                                                                                                                                                                                                                                                                                                                                                                                                                                                                                                                                                                                                                                                                                                                                                                                                                                                                                                      | -1.175648000 | 2.183685000  |              |             |   |              |              |             |   |              |              |              |   |              |              |             |   |              |              |              |   |              |              |              |   |              |             |              |   |              |              |              |   |              |             |              |   |              |             |              |   |              |             |              |   |              |              |             |   |              |              |              |   |             |              |              |   |             |              |              |   |             |              |              |   |             |              |              |   |             |              |             |   |             |              |              |   |             |             |              |   |             |             |              |   |             |             |              |
| H                                                                                                                                                                                        | -0.091786000                                                                                                                                                                                                                                                                                                                                                                                                                                                                                                                                                                                                                                                                                                                                                                                                                                                                                                                                                                                                                                                                                                                                                                                                                                                                                                                                                                                                                                                                                                                                                                                                                                                                                                                                                                                                                                                                                                      | -0.829023000 | -0.131363000 |              |             |   |              |              |             |   |              |              |              |   |              |              |             |   |              |              |              |   |              |              |              |   |              |             |              |   |              |              |              |   |              |             |              |   |              |             |              |   |              |             |              |   |              |              |             |   |              |              |              |   |             |              |              |   |             |              |              |   |             |              |              |   |             |              |              |   |             |              |             |   |             |              |              |   |             |             |              |   |             |             |              |   |             |             |              |
| O                                                                                                                                                                                        | 0.650206000                                                                                                                                                                                                                                                                                                                                                                                                                                                                                                                                                                                                                                                                                                                                                                                                                                                                                                                                                                                                                                                                                                                                                                                                                                                                                                                                                                                                                                                                                                                                                                                                                                                                                                                                                                                                                                                                                                       | -0.947757000 | -0.754341000 |              |             |   |              |              |             |   |              |              |              |   |              |              |             |   |              |              |              |   |              |              |              |   |              |             |              |   |              |              |              |   |              |             |              |   |              |             |              |   |              |             |              |   |              |              |             |   |              |              |              |   |             |              |              |   |             |              |              |   |             |              |              |   |             |              |              |   |             |              |             |   |             |              |              |   |             |             |              |   |             |             |              |   |             |             |              |
| H                                                                                                                                                                                        | 0.425799000                                                                                                                                                                                                                                                                                                                                                                                                                                                                                                                                                                                                                                                                                                                                                                                                                                                                                                                                                                                                                                                                                                                                                                                                                                                                                                                                                                                                                                                                                                                                                                                                                                                                                                                                                                                                                                                                                                       | -0.412112000 | -1.524393000 |              |             |   |              |              |             |   |              |              |              |   |              |              |             |   |              |              |              |   |              |              |              |   |              |             |              |   |              |              |              |   |              |             |              |   |              |             |              |   |              |             |              |   |              |              |             |   |              |              |              |   |             |              |              |   |             |              |              |   |             |              |              |   |             |              |              |   |             |              |             |   |             |              |              |   |             |             |              |   |             |             |              |   |             |             |              |
| H                                                                                                                                                                                        | 1.873628000                                                                                                                                                                                                                                                                                                                                                                                                                                                                                                                                                                                                                                                                                                                                                                                                                                                                                                                                                                                                                                                                                                                                                                                                                                                                                                                                                                                                                                                                                                                                                                                                                                                                                                                                                                                                                                                                                                       | -0.961632000 | -0.263597000 |              |             |   |              |              |             |   |              |              |              |   |              |              |             |   |              |              |              |   |              |              |              |   |              |             |              |   |              |              |              |   |              |             |              |   |              |             |              |   |              |             |              |   |              |              |             |   |              |              |              |   |             |              |              |   |             |              |              |   |             |              |              |   |             |              |              |   |             |              |             |   |             |              |              |   |             |             |              |   |             |             |              |   |             |             |              |
| H                                                                                                                                                                                        | 3.280490000                                                                                                                                                                                                                                                                                                                                                                                                                                                                                                                                                                                                                                                                                                                                                                                                                                                                                                                                                                                                                                                                                                                                                                                                                                                                                                                                                                                                                                                                                                                                                                                                                                                                                                                                                                                                                                                                                                       | -1.911204000 | -0.003212000 |              |             |   |              |              |             |   |              |              |              |   |              |              |             |   |              |              |              |   |              |              |              |   |              |             |              |   |              |              |              |   |              |             |              |   |              |             |              |   |              |             |              |   |              |              |             |   |              |              |              |   |             |              |              |   |             |              |              |   |             |              |              |   |             |              |              |   |             |              |             |   |             |              |              |   |             |             |              |   |             |             |              |   |             |             |              |
| H                                                                                                                                                                                        | 3.514297000                                                                                                                                                                                                                                                                                                                                                                                                                                                                                                                                                                                                                                                                                                                                                                                                                                                                                                                                                                                                                                                                                                                                                                                                                                                                                                                                                                                                                                                                                                                                                                                                                                                                                                                                                                                                                                                                                                       | -0.300862000 | 0.054618000  |              |             |   |              |              |             |   |              |              |              |   |              |              |             |   |              |              |              |   |              |              |              |   |              |             |              |   |              |              |              |   |              |             |              |   |              |             |              |   |              |             |              |   |              |              |             |   |              |              |              |   |             |              |              |   |             |              |              |   |             |              |              |   |             |              |              |   |             |              |             |   |             |              |              |   |             |             |              |   |             |             |              |   |             |             |              |
| O                                                                                                                                                                                        | 2.863357000                                                                                                                                                                                                                                                                                                                                                                                                                                                                                                                                                                                                                                                                                                                                                                                                                                                                                                                                                                                                                                                                                                                                                                                                                                                                                                                                                                                                                                                                                                                                                                                                                                                                                                                                                                                                                                                                                                       | -1.062652000 | 0.190047000  |              |             |   |              |              |             |   |              |              |              |   |              |              |             |   |              |              |              |   |              |              |              |   |              |             |              |   |              |              |              |   |              |             |              |   |              |             |              |   |              |             |              |   |              |              |             |   |              |              |              |   |             |              |              |   |             |              |              |   |             |              |              |   |             |              |              |   |             |              |             |   |             |              |              |   |             |             |              |   |             |             |              |   |             |             |              |
| H                                                                                                                                                                                        | 4.833863000                                                                                                                                                                                                                                                                                                                                                                                                                                                                                                                                                                                                                                                                                                                                                                                                                                                                                                                                                                                                                                                                                                                                                                                                                                                                                                                                                                                                                                                                                                                                                                                                                                                                                                                                                                                                                                                                                                       | 1.342569000  | 0.703513000  |              |             |   |              |              |             |   |              |              |              |   |              |              |             |   |              |              |              |   |              |              |              |   |              |             |              |   |              |              |              |   |              |             |              |   |              |             |              |   |              |             |              |   |              |              |             |   |              |              |              |   |             |              |              |   |             |              |              |   |             |              |              |   |             |              |              |   |             |              |             |   |             |              |              |   |             |             |              |   |             |             |              |   |             |             |              |
| H                                                                                                                                                                                        | 5.023553000                                                                                                                                                                                                                                                                                                                                                                                                                                                                                                                                                                                                                                                                                                                                                                                                                                                                                                                                                                                                                                                                                                                                                                                                                                                                                                                                                                                                                                                                                                                                                                                                                                                                                                                                                                                                                                                                                                       | 1.121436000  | -0.807727000 |              |             |   |              |              |             |   |              |              |              |   |              |              |             |   |              |              |              |   |              |              |              |   |              |             |              |   |              |              |              |   |              |             |              |   |              |             |              |   |              |             |              |   |              |              |             |   |              |              |              |   |             |              |              |   |             |              |              |   |             |              |              |   |             |              |              |   |             |              |             |   |             |              |              |   |             |             |              |   |             |             |              |   |             |             |              |
| O                                                                                                                                                                                        | 4.452906000                                                                                                                                                                                                                                                                                                                                                                                                                                                                                                                                                                                                                                                                                                                                                                                                                                                                                                                                                                                                                                                                                                                                                                                                                                                                                                                                                                                                                                                                                                                                                                                                                                                                                                                                                                                                                                                                                                       | 0.902601000  | -0.063847000 |              |             |   |              |              |             |   |              |              |              |   |              |              |             |   |              |              |              |   |              |              |              |   |              |             |              |   |              |              |              |   |              |             |              |   |              |             |              |   |              |             |              |   |              |              |             |   |              |              |              |   |             |              |              |   |             |              |              |   |             |              |              |   |             |              |              |   |             |              |             |   |             |              |              |   |             |             |              |   |             |             |              |   |             |             |              |

**Table S6:** Calculated total energy (TE), relative energies (RE) and thermal corrected energies. All values are in a.u. (bare protonated surface (CorH<sup>+</sup>). we have computed at PBE0/6-311++G\*\* level. Case (i): A  $\sigma$  complex where the proton is attached to an external carbon of the aromatic compound (i.e. aliphatic sp<sup>3</sup> C-H<sup>+</sup>). Case (ii) A  $\pi$  complex where the proton interacts with the  $\pi$  orbital of these aromatics. Case3 (iii) A  $\sigma$  complex where the proton is attached to an internal carbon of PAHs possessing more than one aromatic ring.

| Energies in                             | Case (i)         | Case (ii)                    | Case (iii)                   |
|-----------------------------------------|------------------|------------------------------|------------------------------|
| Total Energy (TE)                       | <b>-921.3588</b> | -921.3286                    | -921.3286                    |
| Relative Energy (RE)                    | <b>0</b>         | 0.0302 a.u.<br>(18 kcal/mol) | 0.0302 a.u.<br>(18 kcal/mol) |
| Zero Point Energy (ZPE)<br>Corrected TE | <b>-921.067</b>  | -921.0372                    | -921.0372                    |
| G corrected TE                          | <b>-921.1076</b> | -921.0774                    | -921.0218                    |
| H Corrected TE                          | <b>-921.0514</b> | -921.0774                    | -921.0218                    |

**Table S7:** Calculated total energy (TE), relative energies (RE) and thermal corrected energies (a.u) of CorH<sup>+</sup>-W<sub>1</sub> cluster. we have computed at PBE0/6-311++G\*\* level. Case (i): A  $\sigma$  complex where the proton is attached to an external carbon of the aromatic compound (i.e. aliphatic sp<sup>3</sup> C-H<sup>+</sup>). Case (ii) A  $\pi$  complex where the proton interacts with the  $\pi$  orbital of these aromatics. Case3 (iii) A  $\sigma$  complex where the proton is attached to an internal carbon of PAHs possessing more than one aromatic ring.

| Energies in (a.u)                       | Case (i)         | Case (ii)                    | Case (iii)                   |
|-----------------------------------------|------------------|------------------------------|------------------------------|
| Total Energy (TE)                       | <b>-997.7430</b> | -997.7189                    | -997.7189                    |
| Relative Energy (RE)                    | <b>0</b>         | 0.0242 a.u.<br>(15 kcal/mol) | 0.0242 a.u.<br>(15 kcal/mol) |
| Zero Point Energy (ZPE)<br>Corrected TE | <b>-997.4277</b> | -997.4048                    | -997.0372                    |
| G corrected TE                          | <b>-997.4748</b> | -997.4519                    | -997.4519                    |
| H Corrected TE                          | <b>-997.4081</b> | -997.3854                    | -997.3854                    |



**Table S8:** Singlet electronic states of BzH<sup>+</sup>-W<sub>n</sub>, CorH<sup>+</sup>-W<sub>n</sub> and DbcH<sup>+</sup>-W<sub>n</sub> (n=0-3) clusters with excitation energies (E, in eV), transition wavelength ( $\lambda$ , in nm) and oscillator strength (f). We give also the corresponding electron promotion. These computations are done using the TD-DFT method at the PBE0/6-311++G\*\* level.

| Compound                         | State | E    | $\lambda$ | Electron promotion | f      |
|----------------------------------|-------|------|-----------|--------------------|--------|
| BZH <sup>+</sup>                 | S1    | 4.24 | 292       | HOMO to LUMO       | 0.12   |
|                                  | S2    | 5.13 | 241       | HOMO-2 to LUMO     | 0.00   |
|                                  | S3    | 5.45 | 227       | HOMO-3 to LUMO     | 0.0047 |
|                                  | S4    | 5.78 | 214       | HOMO-1 to LUMO     | 0.075  |
| BZH <sup>+</sup> -W <sub>1</sub> | S1    | 4.40 | 281       | HOMO to LUMO       | 0.1085 |
|                                  | S2    | 4.83 | 257       | HOMO-1 to LUMO     | 0.0041 |
|                                  | S3    | 5.43 | 228       | HOMO-3 to LUMO     | 0.0039 |
|                                  | S4    | 5.53 | 223       | HOMO to LUMO+1     | 0.074  |
|                                  | S5    | 5.77 | 214       | HOMO to LUMO+1     | 0.0596 |
| BZH <sup>+</sup> -W <sub>2</sub> | S1    | 4.38 | 282       | HOMO to LUMO       | 0.1069 |
|                                  | S2    | 4.67 | 265       | HOMO-2 to LUMO     | 0.0    |
|                                  | S3    | 4.68 | 264       | HOMO-1 to LUMO     | 0.0061 |
|                                  | S4    | 5.37 | 230       | HOMO-5 to LUMO     | 0.0    |
|                                  | S5    | 5.48 | 226       | HOMO-4 to LUMO     | 0.023  |
|                                  | S6    | 5.65 | 219       | HOMO to LUMO+1     | 0.1588 |
| BZH <sup>+</sup> -W <sub>3</sub> | S1    | 4.45 | 278       | HOMO to LUMO       | 0.1028 |
|                                  | S2    | 4.68 | 264       | HOMO-1 to LUMO     | 0.006  |
|                                  | S3    | 4.73 | 262       | HOMO-2 to LUMO     | 0.0    |
|                                  | S4    | 5.51 | 225       | HOMO-6 to LUMO     | 0.0    |
|                                  | S5    | 5.52 | 225       | HOMO-5 to LUMO     | 0.021  |
|                                  | S6    | 5.55 | 223       | HOMO to LUMO+1     | 0.2276 |
| CORH <sup>+</sup>                | S1    | 2.08 | 595       | HOMO to LUMO       | 0.0788 |
|                                  | S2    | 2.49 | 496       | HOMO-1 to LUMO     | 0.1377 |
|                                  | S3    | 3.09 | 400       | HOMO to LUMO+1     | 0.0367 |
|                                  | S4    | 3.38 | 366       | HOMO to LUMO+1     | 0.0229 |
|                                  | S5    | 3.83 | 323       | HOMO to LUMO+1     | 0.0086 |
|                                  | S6    | 3.95 | 313       | HOMO-1 to LUMO+1   | 0.0378 |
|                                  | S7    | 4.06 | 305       | HOMO-1 to LUMO+1   | 0.215  |
|                                  | S8    | 4.44 | 279       | HOMO to LUMO+1     | 0.1165 |
|                                  | S9    | 4.46 | 277       | HOMO-1 to LUMO+1   | 0.1014 |
|                                  | S10   | 4.57 | 271       | HOMO-6 to LUMO+1   | 0.0002 |
|                                  | S11   | 4.59 | 270       | HOMO-1 to LUMO+1   | 0.1373 |
|                                  | S12   | 4.17 | 263       | HOMO-7 to LUMO+1   | 0.0002 |

|                                   |     |      |     |                   |        |
|-----------------------------------|-----|------|-----|-------------------|--------|
|                                   | S13 | 4.81 | 257 | HOMO-1 to LUMO+2  | 0.2727 |
|                                   | S14 | 4.88 | 253 | HOMO-1 to LUMO+2  | 0.0143 |
|                                   | S15 | 4.95 | 250 | HOMO-2 to LUMO+1  | 0.0809 |
|                                   | S16 | 5.09 | 243 | HOMO-1 to LUMO+2  | 0.1568 |
|                                   | S17 | 5.11 | 242 | HOMO-1 to LUMO+2  | 0.043  |
|                                   | S18 | 5.26 | 235 | HOMO-3 to LUMO+1  | 0.0231 |
|                                   | S19 | 5.30 | 234 | HOMO-2 to LUMO+1  | 0.1196 |
|                                   | S20 | 5.48 | 226 | HOMO-4 to LUMO+1  | 0.0036 |
|                                   | S21 | 5.52 | 224 | HOMO-3 to LUMO+1  | 0.0295 |
|                                   | S22 | 5.59 | 222 | HOMO-3 to LUMO+1  | 0.0464 |
|                                   | S23 | 5.71 | 217 | HOMO-3 to LUMO+1  | 0.0368 |
|                                   | S24 | 5.73 | 216 | HOMO-10 to LUMO+1 | 0.0003 |
|                                   | S25 | 5.75 | 215 | HOMO-10 to LUMO+1 | 0.0001 |
|                                   | S26 | 5.76 | 215 | HOMO-3 to LUMO+2  | 0.0193 |
|                                   | S27 | 5.92 | 209 | HOMO-7 to LUMO+1  | 0.0003 |
|                                   | S28 | 5.93 | 208 | HOMO-4 to LUMO+1  | 0.0328 |
|                                   | S29 | 5.96 | 207 | HOMO-4 to LUMO+1  | 0.0298 |
|                                   | S30 | 6.02 | 205 | HOMO to HOMO+6    | 0      |
|                                   |     |      |     |                   |        |
| CORH <sup>+</sup> -W <sub>1</sub> | S1  | 2.16 | 573 | HOMO to LUMO      | 0.0826 |
|                                   | S2  | 2.53 | 488 | HOMO-1 to LUMO    | 0.139  |
|                                   | S3  | 3.16 | 391 | HOMO to LUMO+1    | 0.0341 |
|                                   | S4  | 3.45 | 358 | HOMO to LUMO+1    | 0.0173 |
|                                   | S5  | 3.87 | 320 | HOMO to LUMO+1    | 0.0246 |
|                                   | S6  | 3.94 | 314 | HOMO-1 to LUMO+1  | 0.0313 |
|                                   | S7  | 4.08 | 303 | HOMO to LUMO+1    | 0.229  |
|                                   | S8  | 4.45 | 278 | HOMO-1 to LUMO+1  | 0.1581 |
|                                   | S9  | 4.46 | 278 | HOMO-1 to LUMO+1  | 0.0657 |
|                                   | S10 | 4.58 | 270 | HOMO-1 to LUMO+1  | 0.1283 |
|                                   | S11 | 4.65 | 266 | HOMO-7 to LUMO    | 0.0001 |
|                                   | S12 | 4.76 | 260 | HOMO-6 to LUMO    | 0.002  |
|                                   | S13 | 4.72 | 259 | HOMO-6 to LUMO    | 0.0001 |
|                                   | S14 | 4.81 | 258 | HOMO-1 to LUMO+2  | 0.3063 |
|                                   | S15 | 4.86 | 254 | HOMO-1 to LUMO+2  | 0.008  |
|                                   | S16 | 4.95 | 250 | HOMO-2 to LUMO+1  | 0.1005 |
|                                   | S17 | 5.08 | 243 | HOMO-2 to LUMO+1  | 0.1064 |
|                                   | S18 | 5.16 | 240 | HOMO-2 to LUMO+1  | 0.104  |
|                                   | S19 | 5.25 | 236 | HOMO-4 to LUMO+1  | 0.0036 |
|                                   | S20 | 5.30 | 233 | HOMO-1 to LUMO+2  | 0.0974 |
|                                   | S21 | 5.49 | 225 | HOMO-2 to LUMO+2  | 0.0153 |
|                                   | S22 | 5.55 | 223 | HOMO-3 to LUMO+2  | 0.0243 |

|                                   |     |      |     |                  |        |
|-----------------------------------|-----|------|-----|------------------|--------|
|                                   | S23 | 5.59 | 221 | HOMO-2 to LUMO+2 | 0.0421 |
|                                   | S24 | 5.72 | 217 | HOMO-3 to LUMO+2 | 0.0277 |
|                                   | S25 | 5.76 | 215 | HOMO-3 to LUMO+2 | 0.0266 |
|                                   | S26 | 5.79 | 214 | HOMO-11 to LUMO  | 0.002  |
|                                   | S27 | 5.80 | 213 | HOMO-12 to LUMO  | 0.0003 |
|                                   | S28 | 5.86 | 211 | HOMO to HOMO+6   | 0.0001 |
|                                   | S29 | 5.93 | 208 | HOMO-4 to LUMO+1 | 0.0292 |
|                                   | S30 | 5.96 | 208 | HOMO-3 to LUMO+2 | 0.0293 |
|                                   |     |      |     |                  |        |
| CORH <sup>+</sup> -W <sub>2</sub> | S1  | 2.23 | 555 | HOMO to LUMO     | 0.086  |
|                                   | S2  | 2.57 | 481 | HOMO-1 to LUMO   | 0.1393 |
|                                   | S3  | 3.23 | 384 | HOMO to LUMO+1   | 0.0309 |
|                                   | S4  | 3.52 | 352 | HOMO to LUMO+1   | 0.0127 |
|                                   | S5  | 3.91 | 317 | HOMO to LUMO+1   | 0.048  |
|                                   | S6  | 3.94 | 314 | HOMO-1 to LUMO+1 | 0.0372 |
|                                   | S7  | 4.10 | 302 | HOMO-1 to LUMO   | 0.2252 |
|                                   | S8  | 4.45 | 278 | HOMO-5 to LUMO   | 0.1926 |
|                                   | S9  | 4.46 | 278 | HOMO-1 to LUMO+1 | 0.0434 |
|                                   | S10 | 4.59 | 270 | HOMO-5 to LUMO   | 0.1065 |
|                                   | S11 | 4.71 | 263 | HOMO-8 to LUMO   | 0.0002 |
|                                   | S12 | 4.80 | 258 | HOMO-6 to LUMO   | 0.0711 |
|                                   | S13 | 4.81 | 258 | HOMO-1 to LUMO+2 | 0.2698 |
|                                   | S14 | 4.85 | 255 | HOMO-1 to LUMO+3 | 0.0037 |
|                                   | S15 | 4.88 | 254 | HOMO-6 to LUMO   | 0.0003 |
|                                   | S16 | 4.89 | 253 | HOMO-6 to LUMO   | 0.0001 |
|                                   | S17 | 4.95 | 250 | HOMO-2 to LUMO+1 | 0.1155 |
|                                   | S18 | 5.08 | 244 | HOMO-3 to LUMO+1 | 0.0884 |
|                                   | S19 | 5.19 | 239 | HOMO-2 to LUMO+2 | 0.1233 |
|                                   | S20 | 5.25 | 236 | HOMO-1 to LUMO+4 | 0.0183 |
|                                   | S21 | 5.33 | 232 | HOMO-3 to LUMO+1 | 0.0528 |
|                                   | S22 | 5.49 | 225 | HOMO-4 to LUMO+1 | 0.0185 |
|                                   | S23 | 5.59 | 222 | HOMO-4 to LUMO+1 | 0.0617 |
|                                   | S24 | 5.60 | 221 | HOMO-3 to LUMO+2 | 0.0066 |
|                                   | S25 | 5.72 | 216 | HOMO-3 to LUMO+2 | 0.0058 |
|                                   | S26 | 5.73 | 216 | HOMO-3 to LUMO+2 | 0.0107 |
|                                   | S27 | 5.77 | 214 | HOMO-3 to LUMO+2 | 0.0348 |
|                                   | S28 | 5.81 | 213 | HOMO-12 to LUMO  | 0.0037 |
|                                   | S29 | 5.84 | 211 | HOMO-12 to LUMO  | 0      |
|                                   | S30 | 5.93 | 208 | HOMO-2 to LUMO+2 | 0.0251 |
|                                   |     |      |     |                  |        |
| CORH <sup>+</sup> -W <sub>3</sub> | S1  | 2.25 | 549 | HOMO to LUMO     | 0.0851 |

|                   |     |      |     |                  |        |
|-------------------|-----|------|-----|------------------|--------|
|                   | S2  | 2.57 | 481 | HOMO-1 to LUMO   | 0.1406 |
|                   | S3  | 3.24 | 382 | HOMO to LUMO+1   | 0.0315 |
|                   | S4  | 3.54 | 354 | HOMO to LUMO+1   | 0      |
|                   | S5  | 3.91 | 316 | HOMO to LUMO+1   | 0.0498 |
|                   | S6  | 3.93 | 314 | HOMO-1 to LUMO+1 | 0.0528 |
|                   | S7  | 4.11 | 301 | HOMO-1 to LUMO   | 0.2247 |
|                   | S8  | 4.43 | 287 | HOMO-1 to LUMO+1 | 0.191  |
|                   | S9  | 4.46 | 277 | HOMO-1 to LUMO+2 | 0.0084 |
|                   | S10 | 4.57 | 271 | HOMO-1 to LUMO+1 | 0.1703 |
|                   | S11 | 4.62 | 268 | HOMO-6 to LUMO   | 0.0024 |
|                   | S12 | 4.70 | 264 | HOMO-1 to LUMO+2 | 0.0343 |
|                   | S13 | 4.73 | 262 | HOMO-8 to LUMO   | 0.0041 |
|                   | S14 | 4.80 | 258 | HOMO-3 to LUMO   | 0.2436 |
|                   | S15 | 4.83 | 256 | HOMO-2 to LUMO+1 | 0.0442 |
|                   | S16 | 4.84 | 256 | HOMO-2 to LUMO+1 | 0.002  |
|                   | S17 | 4.94 | 251 | HOMO-2 to LUMO+1 | 0.1356 |
|                   | S18 | 5.07 | 244 | HOMO-2 to LUMO+1 | 0.0726 |
|                   | S19 | 5.19 | 239 | HOMO-2 to LUMO+1 | 0.126  |
|                   | S20 | 5.25 | 236 | HOMO-2 to LUMO+1 | 0.0367 |
|                   | S21 | 5.33 | 232 | HOMO-3 to LUMO+1 | 0.0396 |
|                   | S22 | 5.43 | 228 | HOMO to LUMO+4   | 0.0001 |
|                   | S23 | 5.48 | 226 | HOMO-2 to LUMO+2 | 0.018  |
|                   | S24 | 5.58 | 222 | HOMO-2 to LUMO+2 | 0.0681 |
|                   | S25 | 5.61 | 220 | HOMO-3 to LUMO+2 | 0.0013 |
|                   | S26 | 5.72 | 216 | HOMO-2 to LUMO+2 | 0.012  |
|                   | S27 | 5.75 | 215 | HOMO-1 to LUMO+4 | 0.0004 |
|                   | S28 | 5.77 | 214 | HOMO-3 to LUMO+2 | 0.0452 |
|                   | S29 | 5.79 | 213 | HOMO-12 to LUMO  | 0.0019 |
|                   | S30 | 5.87 | 211 | HOMO-14 to LUMO  | 0.0007 |
|                   |     |      |     |                  |        |
| DBCH <sup>+</sup> | S1  | 1.48 | 836 | HOMO to LUMO     | 0.1379 |
|                   | S2  | 1.96 | 360 | HOMO-1 to LUMO   | 0.2152 |
|                   | S3  | 2.24 | 553 | HOMO to LUMO     | 0.131  |
|                   | S4  | 2.30 | 539 | HOMO-3 to LUMO   | 0.0047 |
|                   | S5  | 2.86 | 432 | HOMO to LUMO+1   | 0.508  |
|                   | S6  | 2.92 | 423 | HOMO-1 to LUMO+1 | 0.0014 |
|                   | S7  | 3.02 | 410 | HOMO to LUMO+1   | 0.0665 |
|                   | S8  | 3.04 | 407 | HOMO-1 to LUMO+1 | 0.0003 |
|                   | S9  | 3.21 | 386 | HOMO-2 to LUMO+1 | 0.0567 |
|                   | S10 | 3.23 | 383 | HOMO-1 to LUMO+1 | 0.1114 |
|                   | S11 | 3.26 | 379 | HOMO-2 to LUMO+1 | 0.0014 |

|                                   |     |      |     |                  |        |
|-----------------------------------|-----|------|-----|------------------|--------|
|                                   | S12 | 3.31 | 374 | HOMO-1 to LUMO+1 | 0.133  |
|                                   | S13 | 3.35 | 369 | HOMO-3 to LUMO+1 | 0.0284 |
|                                   | S14 | 3.49 | 354 | HOMO-1 to LUMO+1 | 0.1311 |
|                                   | S15 | 3.53 | 351 | HOMO-2 to LUMO+1 | 0.0096 |
|                                   | S16 | 3.56 | 347 | HOMO-2 to LUMO+1 | 0.0627 |
|                                   | S17 | 3.62 | 342 | HOMO-1 to LUMO+1 | 0.0132 |
|                                   | S18 | 3.65 | 339 | HOMO-2 to LUMO+2 | 0.2008 |
|                                   | S19 | 3.67 | 337 | HOMO-2 to LUMO+1 | 0.0612 |
|                                   | S20 | 3.78 | 327 | HOMO-1 to LUMO+3 | 0.0046 |
|                                   | S21 | 3.84 | 322 | HOMO-3 to LUMO+2 | 0      |
|                                   | S22 | 3.89 | 318 | HOMO-2 to LUMO+2 | 0.0412 |
|                                   | S23 | 3.90 | 318 | HOMO-1 to LUMO+2 | 0.0271 |
|                                   | S24 | 4.03 | 307 | HOMO-2 to LUMO+2 | 0.0492 |
|                                   | S25 | 4.10 | 302 | HOMO-2 to LUMO+1 | 0.0206 |
|                                   | S26 | 4.11 | 301 | HOMO-2 to LUMO+2 | 0.0211 |
|                                   | S27 | 4.15 | 298 | HOMO-3 to LUMO+2 | 0.015  |
|                                   | S28 | 4.21 | 294 | HOMO-4 to LUMO+1 | 0.0002 |
|                                   | S29 | 4.22 | 294 | HOMO-2 to LUMO+2 | 0.0719 |
|                                   | S30 | 4.28 | 289 | HOMO-3 to LUMO+3 | 0.0346 |
|                                   |     |      |     |                  |        |
| DBCH <sup>+</sup> -W <sub>1</sub> | S1  | 1.51 | 816 | HOMO to LUMO     | 0.1436 |
|                                   | S2  | 1.98 | 624 | HOMO to LUMO+1   | 0.2116 |
|                                   | S3  | 2.26 | 547 | HOMO to LUMO     | 0.1273 |
|                                   | S4  | 2.33 | 530 | HOMO-3 to LUMO+2 | 0.0054 |
|                                   | S5  | 2.87 | 432 | HOMO to LUMO+1   | 0.5419 |
|                                   | S6  | 2.92 | 424 | HOMO-1 to LUMO+1 | 0.0046 |
|                                   | S7  | 3.03 | 408 | HOMO-4 to LUMO   | 0.0525 |
|                                   | S8  | 3.07 | 403 | HOMO-3 to LUMO   | 0.0011 |
|                                   | S9  | 3.22 | 384 | HOMO-2 to LUMO+1 | 0.0468 |
|                                   | S10 | 3.25 | 380 | HOMO-4 to LUMO   | 0.1733 |
|                                   | S11 | 3.28 | 377 | HOMO-2 to LUMO+1 | 0.0068 |
|                                   | S12 | 3.32 | 373 | HOMO-3 to LUMO+1 | 0.0779 |
|                                   | S13 | 3.38 | 366 | HOMO-3 to LUMO+1 | 0.0303 |
|                                   | S14 | 3.51 | 353 | HOMO-1 to LUMO+1 | 0.1303 |
|                                   | S15 | 3.53 | 350 | HOMO-2 to LUMO+1 | 0.0002 |
|                                   | S16 | 3.58 | 346 | HOMO-2 to LUMO+1 | 0.0746 |
|                                   | S17 | 3.63 | 341 | HOMO-1 to LUMO+1 | 0.0159 |
|                                   | S18 | 3.65 | 339 | HOMO-3 to LUMO+1 | 0.1847 |
|                                   | S19 | 3.68 | 336 | HOMO-1 to LUMO+2 | 0.0565 |
|                                   | S20 | 3.79 | 327 | HOMO-1 to LUMO+3 | 0.0023 |
|                                   | S21 | 3.84 | 322 | HOMO-3 to LUMO+2 | 0.0001 |

|                                   |     |      |     |                  |        |
|-----------------------------------|-----|------|-----|------------------|--------|
|                                   | S22 | 3.88 | 319 | HOMO-2 to LUMO+2 | 0.0389 |
|                                   | S23 | 3.89 | 318 | HOMO-1 to LUMO+2 | 0.0284 |
|                                   | S24 | 4.04 | 306 | HOMO-2 to LUMO+2 | 0.0582 |
|                                   | S25 | 4.11 | 301 | HOMO-2 to LUMO+1 | 0.0227 |
|                                   | S26 | 4.13 | 300 | HOMO-2 to LUMO+2 | 0.0201 |
|                                   | S27 | 4.15 | 298 | HOMO-3 to LUMO+2 | 0.0125 |
|                                   | S28 | 4.22 | 294 | HOMO-3 to LUMO+2 | 0.0031 |
|                                   | S29 | 4.23 | 293 | HOMO-2 to LUMO+2 | 0.0597 |
|                                   | S30 | 4.28 | 289 | HOMO-2 to LUMO+2 | 0.0591 |
|                                   |     |      |     |                  |        |
| DBCH <sup>+</sup> -W <sub>2</sub> | S1  | 1.56 | 791 | HOMO to LUMO     | 0.1509 |
|                                   | S2  | 2.00 | 617 | HOMO to LUMO+1   | 0.2061 |
|                                   | S3  | 2.30 | 538 | HOMO to LUMO     | 0.1211 |
|                                   | S4  | 2.38 | 519 | HOMO-3 to LUMO   | 0.0061 |
|                                   | S5  | 2.87 | 432 | HOMO to LUMO+1   | 0.5795 |
|                                   | S6  | 2.92 | 424 | HOMO-1 to LUMO+1 | 0.012  |
|                                   | S7  | 3.05 | 405 | HOMO-4 to LUMO   | 0.0342 |
|                                   | S8  | 3.11 | 399 | HOMO-5 to LUMO   | 0.0003 |
|                                   | S9  | 3.23 | 383 | HOMO-4 to LUMO   | 0.0353 |
|                                   | S10 | 3.27 | 378 | HOMO-1 to LUMO+1 | 0.2536 |
|                                   | S11 | 3.31 | 373 | HOMO-2 to LUMO+1 | 0.0141 |
|                                   | S12 | 3.34 | 371 | HOMO-1 to LUMO+1 | 0.0111 |
|                                   | S13 | 3.41 | 363 | HOMO-3 to LUMO+1 | 0.0261 |
|                                   | S14 | 3.52 | 352 | HOMO-1 to LUMO+1 | 0.1286 |
|                                   | S15 | 3.53 | 351 | HOMO-2 to LUMO+1 | 0.0023 |
|                                   | S16 | 3.60 | 344 | HOMO-1 to LUMO+2 | 0.077  |
|                                   | S17 | 3.63 | 341 | HOMO-1 to LUMO+1 | 0.0178 |
|                                   | S18 | 3.64 | 340 | HOMO-2 to LUMO+2 | 0.1742 |
|                                   | S19 | 3.68 | 337 | HOMO-2 to LUMO+1 | 0.0486 |
|                                   | S20 | 3.79 | 326 | HOMO-1 to LUMO+3 | 0.0008 |
|                                   | S21 | 3.84 | 323 | HOMO-3 to LUMO+2 | 0      |
|                                   | S22 | 3.88 | 319 | HOMO-2 to LUMO+2 | 0.0349 |
|                                   | S23 | 3.89 | 318 | HOMO-1 to LUMO+2 | 0.0303 |
|                                   | S24 | 4.05 | 306 | HOMO-2 to LUMO+2 | 0.0634 |
|                                   | S25 | 4.12 | 301 | HOMO-3 to LUMO+2 | 0.0266 |
|                                   | S26 | 4.16 | 298 | HOMO-3 to LUMO+2 | 0.0092 |
|                                   | S27 | 4.17 | 298 | HOMO-3 to LUMO+2 | 0.0166 |
|                                   | S28 | 4.21 | 293 | HOMO-3 to LUMO+2 | 0.0069 |
|                                   | S29 | 4.23 | 293 | HOMO-2 to LUMO+2 | 0.0426 |
|                                   | S30 | 4.27 | 290 | HOMO-4 to LUMO+1 | 0.0802 |
|                                   |     |      |     |                  |        |

|                                   |     |      |     |                  |        |
|-----------------------------------|-----|------|-----|------------------|--------|
| DBCH <sup>+</sup> -W <sub>3</sub> | S1  | 1.57 | 785 | HOMO to LUMO     | 0.1528 |
|                                   | S2  | 2.01 | 614 | HOMO to LUMO+1   | 0.2061 |
|                                   | S3  | 2.30 | 537 | HOMO to LUMO     | 0.1201 |
|                                   | S4  | 2.40 | 516 | HOMO-3 to LUMO   | 0.0063 |
|                                   | S5  | 2.87 | 431 | HOMO to LUMO+1   | 0.588  |
|                                   | S6  | 2.92 | 424 | HOMO-1 to LUMO+1 | 0.0128 |
|                                   | S7  | 3.05 | 406 | HOMO-4 to LUMO   | 0.0388 |
|                                   | S8  | 3.11 | 398 | HOMO-5 to LUMO   | 0      |
|                                   | S9  | 3.24 | 382 | HOMO-2 to LUMO   | 0.031  |
|                                   | S10 | 3.27 | 378 | HOMO-1 to LUMO+1 | 0.2647 |
|                                   | S11 | 3.32 | 373 | HOMO-2 to LUMO+1 | 0.0144 |
|                                   | S12 | 3.34 | 370 | HOMO-1 to LUMO+1 | 0.006  |
|                                   | S13 | 3.42 | 362 | HOMO-2 to LUMO+1 | 0.0269 |
|                                   | S14 | 3.52 | 351 | HOMO-1 to LUMO+1 | 0.1345 |
|                                   | S15 | 3.53 | 351 | HOMO-2 to LUMO+1 | 0.0028 |
|                                   | S16 | 3.61 | 343 | HOMO-1 to LUMO+2 | 0.0798 |
|                                   | S17 | 3.63 | 341 | HOMO-3 to LUMO+1 | 0.0215 |
|                                   | S18 | 3.65 | 339 | HOMO-3 to LUMO+1 | 0.1519 |
|                                   | S19 | 3.68 | 336 | HOMO-2 to LUMO+1 | 0.0481 |
|                                   | S20 | 3.81 | 325 | HOMO-1 to LUMO+3 | 0.0002 |
|                                   | S21 | 3.84 | 323 | HOMO-3 to LUMO+2 | 0.0001 |
|                                   | S22 | 3.88 | 319 | HOMO-2 to LUMO+2 | 0.0354 |
|                                   | S23 | 3.89 | 318 | HOMO-1 to LUMO+2 | 0.0301 |
|                                   | S24 | 4.04 | 306 | HOMO-2 to LUMO+2 | 0.0706 |
|                                   | S25 | 4.13 | 300 | HOMO-2 to LUMO+1 | 0.0222 |
|                                   | S26 | 4.16 | 297 | HOMO-3 to LUMO+2 | 0.0089 |
|                                   | S27 | 4.17 | 297 | HOMO-2 to LUMO+2 | 0.0197 |
|                                   | S28 | 4.22 | 293 | HOMO-3 to LUMO+2 | 0.0098 |
|                                   | S29 | 4.24 | 292 | HOMO-2 to LUMO+2 | 0.0441 |
|                                   | S30 | 4.27 | 290 | HOMO-4 to LUMO+1 | 0.0642 |

**Table S9:** Triplet electronic states of BzH<sup>+</sup>-W<sub>n</sub>, CorH<sup>+</sup>-W<sub>n</sub> and DbcH<sup>+</sup>-W<sub>n</sub> (n=0-3) clusters with excitation energies (E, in eV), transition wavelength (λ, in nm) and oscillator strength (f). We give also the corresponding electron promotion. These computations are done using the TD-DFT method at the PBE0/6-311++G\*\* level.

| Compound                         | State | E    | λ    | Electron promotion |
|----------------------------------|-------|------|------|--------------------|
| BZH <sup>+</sup>                 | T1    | 2.21 | 560  | HOMO to LUMO       |
|                                  | T2    | 3.82 | 324  | HOMO-1 to LUMO     |
|                                  | T3    | 4.48 | 276  | HOMO to LUMO+1     |
|                                  | T4    | 4.82 | 257  | HOMO-2 to LUMO     |
|                                  | T5    | 4.95 | 250  | HOMO-3 to LUMO     |
| BZH <sup>+</sup> -W <sub>1</sub> | T1    | 2.51 | 493  | HOMO to LUMO       |
|                                  | T2    | 3.84 | 322  | HOMO-2 to LUMO     |
|                                  | T3    | 4.35 | 285  | HOMO to LUMO+1     |
|                                  | T4    | 4.77 | 260  | HOMO-1 to LUMO     |
|                                  | T5    | 5.11 | 242  | HOMO-3 to LUMO     |
|                                  | T6    | 5.16 | 240  | HOMO-4 to LUMO     |
| BZH <sup>+</sup> -W <sub>2</sub> | T1    | 2.52 | 492  | HOMO to LUMO       |
|                                  | T2    | 3.85 | 322  | HOMO-3 to LUMO     |
|                                  | T3    | 4.36 | 284  | HOMO to LUMO+1     |
|                                  | T4    | 4.64 | 267  | HOMO-1 to LUMO     |
|                                  | T5    | 4.65 | 266  | HOMO-2 to LUMO     |
|                                  | T6    | 4.96 | 249  | HOMO-4 to LUMO     |
|                                  | T7    | 5.07 | 244  | HOMO-5 to LUMO     |
| BZH <sup>+</sup> -W <sub>3</sub> | T1    | 2.65 | 467  | HOMO to LUMO       |
|                                  | T2    | 3.78 | 328  | HOMO to LUMO+1     |
|                                  | T3    | 4.35 | 284  | HOMO to LUMO+1     |
|                                  | T4    | 4.63 | 267  | HOMO-1 to LUMO     |
|                                  | T5    | 4.70 | 264  | HOMO-2 to LUMO     |
|                                  | T6    | 5.00 | 248  | HOMO-5 to LUMO     |
|                                  | T7    | 5.21 | 238  | HOMO-6 to LUMO     |
|                                  | T8    | 5.86 | 211  | HOMO-3 to LUMO     |
| CORH <sup>+</sup>                | T1    | 1.20 | 1031 | HOMO to LUMO       |
|                                  | T2    | 1.75 | 704  | HOMO to LUMO       |
|                                  | T3    | 2.59 | 477  | HOMO to LUMO+1     |
|                                  | T4    | 2.65 | 467  | HOMO-2 to LUMO     |
|                                  | T5    | 2.87 | 430  | HOMO to LUMO+1     |
|                                  | T6    | 2.97 | 416  | HOMO-1 to LUMO+1   |
|                                  | T7    | 3.50 | 353  | HOMO to LUMO+1     |



|                                   |     |      |     |                  |
|-----------------------------------|-----|------|-----|------------------|
|                                   | T8  | 3.66 | 338 | HOMO to LUMO+1   |
|                                   | T9  | 3.75 | 330 | HOMO-3 to LUMO+1 |
|                                   | T10 | 3.84 | 322 | HOMO-1 to LUMO+1 |
|                                   | T11 | 3.96 | 312 | HOMO to LUMO+1   |
|                                   | T12 | 4.04 | 306 | HOMO-1 to LUMO+1 |
|                                   | T13 | 4.30 | 288 | HOMO-2 to LUMO+2 |
|                                   | T14 | 4.40 | 281 | HOMO-1 to LUMO+3 |
|                                   | T15 | 4.46 | 278 | HOMO-6 to LUMO   |
|                                   | T16 | 4.50 | 275 | HOMO-1 to LUMO+3 |
|                                   | T17 | 4.57 | 271 | HOMO-2 to LUMO+1 |
|                                   | T18 | 4.58 | 271 | HOMO-2 to LUMO+1 |
|                                   | T19 | 4.68 | 264 | HOMO-2 to LUMO+1 |
|                                   | T20 | 4.73 | 262 | HOMO-2 to LUMO+2 |
|                                   | T21 | 4.83 | 256 | HOMO-2 to LUMO+2 |
|                                   | T22 | 4.94 | 250 | HOMO-2 to LUMO+1 |
|                                   | T23 | 5.05 | 245 | HOMO-2 to LUMO+2 |
|                                   | T24 | 5.13 | 242 | HOMO-3 to LUMO+1 |
|                                   | T25 | 5.15 | 241 | HOMO-2 to LUMO+2 |
|                                   | T26 | 5.26 | 235 | HOMO-2 to LUMO+2 |
|                                   | T27 | 5.36 | 231 | HOMO-3 to LUMO+1 |
|                                   | T28 | 5.56 | 223 | HOMO-10 to LUMO  |
|                                   | T29 | 5.57 | 222 | HOMO-4 to LUMO+1 |
|                                   | T30 | 5.60 | 221 | HOMO-6 to LUMO+1 |
|                                   |     |      |     |                  |
| CORH <sup>+</sup> -W <sub>1</sub> | T1  | 1.28 | 961 | HOMO to LUMO     |
|                                   | T2  | 1.82 | 678 | HOMO-1 to LUMO   |
|                                   | T3  | 2.61 | 473 | HOMO to LUMO+1   |
|                                   | T4  | 2.73 | 453 | HOMO-1 to LUMO   |
|                                   | T5  | 2.92 | 423 | HOMO to LUMO+1   |
|                                   | T6  | 3.03 | 407 | HOMO-1 to LUMO   |
|                                   | T7  | 3.50 | 353 | HOMO to LUMO+1   |
|                                   | T8  | 3.66 | 338 | HOMO-1 to LUMO+1 |
|                                   | T9  | 3.77 | 328 | HOMO-1 to LUMO+1 |
|                                   | T10 | 3.84 | 322 | HOMO-1 to LUMO+1 |
|                                   | T11 | 3.97 | 312 | HOMO-1 to LUMO+2 |
|                                   | T12 | 4.04 | 306 | HOMO-1 to LUMO+1 |
|                                   | T13 | 4.31 | 288 | HOMO to LUMO+3   |
|                                   | T14 | 4.43 | 280 | HOMO-2 to LUMO+1 |
|                                   | T15 | 4.49 | 275 | HOMO-2 to LUMO+1 |
|                                   | T16 | 4.53 | 273 | HOMO-7 to LUMO   |
|                                   | T17 | 4.57 | 271 | HOMO-2 to LUMO+1 |

|                                   |     |      |     |                  |
|-----------------------------------|-----|------|-----|------------------|
|                                   | T18 | 4.61 | 268 | HOMO-8 to LUMO   |
|                                   | T19 | 4.69 | 264 | HOMO-2 to LUMO+2 |
|                                   | T20 | 4.76 | 260 | HOMO-2 to LUMO+3 |
|                                   | T21 | 4.77 | 259 | HOMO-2 to LUMO+3 |
|                                   | T22 | 4.84 | 256 | HOMO-2 to LUMO+3 |
|                                   | T23 | 4.95 | 250 | HOMO-3 to LUMO+1 |
|                                   | T24 | 5.05 | 245 | HOMO-3 to LUMO+1 |
|                                   | T25 | 5.11 | 242 | HOMO-3 to LUMO+2 |
|                                   | T26 | 5.16 | 240 | HOMO-2 to LUMO+2 |
|                                   | T27 | 5.27 | 235 | HOMO-3 to LUMO+2 |
|                                   | T28 | 5.36 | 231 | HOMO-3 to LUMO+2 |
|                                   | T29 | 5.57 | 222 | HOMO-3 to LUMO+2 |
|                                   | T30 | 5.60 | 221 | HOMO-3 to LUMO+2 |
|                                   |     |      |     |                  |
| CORH <sup>+</sup> -W <sub>2</sub> | T1  | 1.36 | 905 | HOMO to LUMO     |
|                                   | T2  | 1.88 | 657 | HOMO-1 to LUMO   |
|                                   | T3  | 2.62 | 472 | HOMO to LUMO+1   |
|                                   | T4  | 2.80 | 442 | HOMO-2 to LUMO   |
|                                   | T5  | 2.98 | 415 | HOMO to LUMO+1   |
|                                   | T6  | 3.09 | 401 | HOMO-1 to LUMO+1 |
|                                   | T7  | 3.50 | 354 | HOMO to LUMO+1   |
|                                   | T8  | 3.66 | 338 | HOMO to LUMO+1   |
|                                   | T9  | 3.78 | 327 | HOMO-1 to LUMO+1 |
|                                   | T10 | 3.84 | 322 | HOMO-1 to LUMO+1 |
|                                   | T11 | 3.99 | 310 | HOMO to LUMO+1   |
|                                   | T12 | 4.04 | 306 | HOMO-1 to LUMO+1 |
|                                   | T13 | 4.31 | 287 | HOMO-3 to LUMO+1 |
|                                   | T14 | 4.45 | 278 | HOMO-4 to LUMO+2 |
|                                   | T15 | 4.49 | 275 | HOMO-1 to LUMO+2 |
|                                   | T16 | 4.57 | 271 | HOMO-2 to LUMO+1 |
|                                   | T17 | 4.59 | 270 | HOMO-9 to LUMO   |
|                                   | T18 | 4.65 | 266 | HOMO-7 to LUMO   |
|                                   | T19 | 4.69 | 264 | HOMO-4 to LUMO+1 |
|                                   | T20 | 4.78 | 259 | HOMO to LUMO+1   |
|                                   | T21 | 4.86 | 255 | HOMO-2 to LUMO+2 |
|                                   | T22 | 4.87 | 254 | HOMO-6 to LUMO   |
|                                   | T23 | 4.88 | 254 | HOMO-6 to LUMO   |
|                                   | T24 | 4.95 | 250 | HOMO-2 to LUMO+1 |
|                                   | T25 | 5.06 | 245 | HOMO-3 to LUMO+1 |
|                                   | T26 | 5.10 | 243 | HOMO-3 to LUMO+1 |
|                                   | T27 | 5.18 | 239 | HOMO-2 to LUMO+2 |

|                                   |     |      |      |                  |
|-----------------------------------|-----|------|------|------------------|
|                                   | T28 | 5.28 | 235  | HOMO-3 to LUMO+2 |
|                                   | T29 | 5.36 | 231  | HOMO-3 to LUMO+2 |
|                                   | T30 | 5.59 | 222  | HOMO-2 to LUMO+2 |
|                                   |     |      |      |                  |
| CORH <sup>+</sup> -W <sub>3</sub> | T1  | 1.39 | 889  | HOMO to LUMO     |
|                                   | T2  | 1.89 | 653  | HOMO-1 to LUMO   |
|                                   | T3  | 2.63 | 471  | HOMO to LUMO+1   |
|                                   | T4  | 2.81 | 441  | HOMO-2 to LUMO   |
|                                   | T5  | 3.00 | 413  | HOMO to LUMO+1   |
|                                   | T6  | 3.10 | 399  | HOMO-1 to LUMO+1 |
|                                   | T7  | 3.49 | 354  | HOMO-1 to LUMO+2 |
|                                   | T8  | 3.64 | 340  | HOMO-1 to LUMO+1 |
|                                   | T9  | 3.78 | 327  | HOMO-1 to LUMO+1 |
|                                   | T10 | 3.84 | 323  | HOMO-1 to LUMO+1 |
|                                   | T11 | 3.99 | 311  | HOMO-2 to LUMO+1 |
|                                   | T12 | 4.04 | 306  | HOMO-1 to LUMO+1 |
|                                   | T13 | 4.31 | 287  | HOMO-3 to LUMO+1 |
|                                   | T14 | 4.45 | 278  | HOMO-2 to LUMO+1 |
|                                   | T15 | 4.47 | 277  | HOMO-2 to LUMO+1 |
|                                   | T16 | 4.54 | 273  | HOMO-2 to LUMO+1 |
|                                   | T17 | 4.58 | 271  | HOMO-1 to LUMO+1 |
|                                   | T18 | 4.58 | 270  | HOMO-6 to LUMO   |
|                                   | T19 | 4.60 | 269  | HOMO-6 to LUMO   |
|                                   | T20 | 4.62 | 267  | HOMO-6 to LUMO   |
|                                   | T21 | 4.68 | 265  | HOMO-2 to LUMO   |
|                                   | T22 | 4.73 | 262  | HOMO-2 to LUMO+1 |
|                                   | T23 | 4.79 | 259  | HOMO-1 to LUMO+2 |
|                                   | T24 | 4.88 | 254  | HOMO-2 to LUMO+2 |
|                                   | T25 | 4.95 | 250  | HOMO-2 to LUMO+1 |
|                                   | T26 | 5.06 | 245  | HOMO-2 to LUMO+2 |
|                                   | T27 | 5.09 | 243  | HOMO-1 to LUMO+2 |
|                                   | T28 | 5.17 | 239  | HOMO-2 to LUMO+1 |
|                                   | T29 | 5.27 | 235  | HOMO-3 to LUMO+2 |
|                                   | T30 | 5.35 | 231  | HOMO-3 to LUMO+2 |
|                                   | T31 | 5.42 | 228  | HOMO to LUMO+4   |
|                                   |     |      |      |                  |
| DBCH <sup>+</sup>                 | T1  | 0.87 | 1411 | HOMO to LUMO     |
|                                   | T2  | 1.32 | 935  | HOMO-1 to LUMO   |
|                                   | T3  | 1.76 | 703  | HOMO to LUMO+1   |
|                                   | T4  | 1.93 | 640  | HOMO to LUMO     |
|                                   | T5  | 2.10 | 589  | HOMO to LUMO+1   |

|                                   |     |      |      |                  |
|-----------------------------------|-----|------|------|------------------|
|                                   | T6  | 2.43 | 509  | HOMO-1 to LUMO+1 |
|                                   | T7  | 2.48 | 499  | HOMO-2 to LUMO   |
|                                   | T8  | 2.56 | 483  | HOMO-4 to LUMO   |
|                                   | T9  | 2.79 | 444  | HOMO to LUMO+1   |
|                                   | T10 | 2.81 | 440  | HOMO-1 to LUMO+1 |
|                                   | T11 | 2.88 | 429  | HOMO-1 to LUMO   |
|                                   | T12 | 2.89 | 429  | HOMO-1 to LUMO+1 |
|                                   | T13 | 2.96 | 418  | HOMO-4 to LUMO   |
|                                   | T14 | 3.04 | 406  | HOMO-1 to LUMO+2 |
|                                   | T15 | 3.12 | 396  | HOMO-2 to LUMO+2 |
|                                   | T16 | 3.19 | 388  | HOMO-2 to LUMO+1 |
|                                   | T17 | 3.28 | 378  | HOMO-2 to LUMO+1 |
|                                   | T18 | 3.31 | 374  | HOMO-1 to LUMO+1 |
|                                   | T19 | 3.38 | 366  | HOMO-1 to LUMO+3 |
|                                   | T20 | 3.39 | 366  | HOMO to LUMO+1   |
|                                   | T21 | 3.50 | 354  | HOMO-2 to LUMO+1 |
|                                   | T22 | 3.51 | 353  | HOMO-3 to LUMO+1 |
|                                   | T23 | 3.56 | 348  | HOMO-1 to LUMO+2 |
|                                   | T24 | 3.58 | 346  | HOMO-1 to LUMO+3 |
|                                   | T25 | 3.61 | 343  | HOMO-2 to LUMO+3 |
|                                   | T26 | 3.62 | 342  | HOMO-1 to LUMO+3 |
|                                   | T27 | 3.71 | 334  | HOMO-2 to LUMO+1 |
|                                   | T28 | 3.75 | 330  | HOMO-2 to LUMO+1 |
|                                   | T29 | 3.81 | 324  | HOMO-2 to LUMO+2 |
|                                   | T30 | 3.85 | 322  | HOMO-2 to LUMO+2 |
|                                   |     |      |      |                  |
| DBCH <sup>+</sup> -W <sub>1</sub> | T1  | 0.91 | 1356 | HOMO to LUMO     |
|                                   | T2  | 1.35 | 912  | HOMO-1 to LUMO   |
|                                   | T3  | 1.77 | 700  | HOMO to LUMO+1   |
|                                   | T4  | 1.95 | 633  | HOMO to LUMO     |
|                                   | T5  | 2.13 | 158  | HOMO to LUMO+1   |
|                                   | T6  | 2.43 | 508  | HOMO-1 to LUMO+1 |
|                                   | T7  | 2.48 | 499  | HOMO-2 to LUMO+1 |
|                                   | T8  | 2.57 | 480  | HOMO to LUMO+2   |
|                                   | T9  | 2.80 | 441  | HOMO to LUMO+1   |
|                                   | T10 | 2.83 | 438  | HOMO-1 to LUMO+1 |
|                                   | T11 | 2.89 | 429  | HOMO-1 to LUMO+1 |
|                                   | T12 | 2.90 | 427  | HOMO-1 to LUMO   |
|                                   | T13 | 2.99 | 414  | HOMO to LUMO+2   |
|                                   | T14 | 3.06 | 405  | HOMO to LUMO+1   |
|                                   | T15 | 3.14 | 394  | HOMO-1 to LUMO+3 |

|                                   |     |      |      |                  |
|-----------------------------------|-----|------|------|------------------|
|                                   | T16 | 3.20 | 386  | HOMO-2 to LUMO+1 |
|                                   | T17 | 3.28 | 377  | HOMO-2 to LUMO+1 |
|                                   | T18 | 3.32 | 373  | HOMO-1 to LUMO+3 |
|                                   | T19 | 3.39 | 366  | HOMO to LUMO+1   |
|                                   | T20 | 3.40 | 364  | HOMO-1 to LUMO+3 |
|                                   | T21 | 3.50 | 354  | HOMO-1 to LUMO+4 |
|                                   | T22 | 3.51 | 353  | HOMO-3 to LUMO+1 |
|                                   | T23 | 3.56 | 348  | HOMO-2 to LUMO+3 |
|                                   | T24 | 3.59 | 345  | HOMO-3 to LUMO+1 |
|                                   | T25 | 3.62 | 342  | HOMO-2 to LUMO+3 |
|                                   | T26 | 3.63 | 341  | HOMO-1 to LUMO+3 |
|                                   | T27 | 3.72 | 333  | HOMO-2 to LUMO+1 |
|                                   | T28 | 3.75 | 330  | HOMO-1 to LUMO+4 |
|                                   | T29 | 3.82 | 324  | HOMO-1 to LUMO+3 |
|                                   | T30 | 3.86 | 321  | HOMO-2 to LUMO+2 |
|                                   |     |      |      |                  |
| DBCH <sup>+</sup> -W <sub>2</sub> | T1  | 0.96 | 1287 | HOMO to LUMO+1   |
|                                   | T2  | 1.39 | 886  | HOMO-1 to LUMO   |
|                                   | T3  | 1.77 | 697  | HOMO to LUMO+1   |
|                                   | T4  | 1.99 | 621  | HOMO to LUMO     |
|                                   | T5  | 2.17 | 571  | HOMO to LUMO+1   |
|                                   | T6  | 2.44 | 508  | HOMO-1 to LUMO+1 |
|                                   | T7  | 2.48 | 498  | HOMO-1 to LUMO+1 |
|                                   | T8  | 2.59 | 477  | HOMO-1 to LUMO+1 |
|                                   | T9  | 2.83 | 438  | HOMO to LUMO+1   |
|                                   | T10 | 2.84 | 435  | HOMO-1 to LUMO+1 |
|                                   | T11 | 2.89 | 429  | HOMO-1 to LUMO+1 |
|                                   | T12 | 2.91 | 425  | HOMO to LUMO+1   |
|                                   | T13 | 3.02 | 410  | HOMO to LUMO+2   |
|                                   | T14 | 3.07 | 402  | HOMO to LUMO+1   |
|                                   | T15 | 3.17 | 391  | HOMO-2 to LUMO+2 |
|                                   | T16 | 3.21 | 385  | HOMO-2 to LUMO+1 |
|                                   | T17 | 3.29 | 377  | HOMO-2 to LUMO+1 |
|                                   | T18 | 3.33 | 372  | HOMO-1 to LUMO+1 |
|                                   | T19 | 3.38 | 366  | HOMO to LUMO+1   |
|                                   | T20 | 3.40 | 346  | HOMO-2 to LUMO+2 |
|                                   | T21 | 3.49 | 354  | HOMO-2 to LUMO+1 |
|                                   | T22 | 3.51 | 352  | HOMO-3 to LUMO+1 |
|                                   | T23 | 3.56 | 348  | HOMO-1 to LUMO+2 |
|                                   | T24 | 3.59 | 354  | HOMO-3 to LUMO+1 |
|                                   | T25 | 3.63 | 341  | HOMO-1 to LUMO+2 |

|                                   |     |      |      |                  |
|-----------------------------------|-----|------|------|------------------|
|                                   | T26 | 3.64 | 340  | HOMO-2 to LUMO+2 |
|                                   | T27 | 3.72 | 332  | HOMO-2 to LUMO+1 |
|                                   | T28 | 3.75 | 330  | HOMO-1 to LUMO+2 |
|                                   | T29 | 3.82 | 324  | HOMO-2 to LUMO+2 |
|                                   | T30 | 3.87 | 320  | HOMO-2 to LUMO+2 |
|                                   |     |      |      |                  |
| DBCH <sup>+</sup> -W <sub>3</sub> | T1  | 0.97 | 1273 | HOMO to LUMO     |
|                                   | T2  | 1.41 | 879  | HOMO-1 to LUMO   |
|                                   | T3  | 1.78 | 696  | HOMO to LUMO+1   |
|                                   | T4  | 1.99 | 621  | HOMO to LUMO     |
|                                   | T5  | 2.18 | 568  | HOMO to LUMO+1   |
|                                   | T6  | 2.44 | 507  | HOMO-1 to LUMO+1 |
|                                   | T7  | 2.47 | 500  | HOMO-1 to LUMO+2 |
|                                   | T8  | 2.59 | 477  | HOMO-1 to LUMO+1 |
|                                   | T9  | 2.83 | 438  | HOMO to LUMO+1   |
|                                   | T10 | 2.84 | 435  | HOMO-1 to LUMO+1 |
|                                   | T11 | 2.89 | 429  | HOMO-1 to LUMO+1 |
|                                   | T12 | 2.92 | 424  | HOMO-1 to LUMO+1 |
|                                   | T13 | 3.03 | 409  | HOMO to LUMO+2   |
|                                   | T14 | 3.08 | 402  | HOMO to LUMO+1   |
|                                   | T15 | 3.17 | 390  | HOMO-2 to LUMO+2 |
|                                   | T16 | 3.22 | 384  | HOMO-2 to LUMO+1 |
|                                   | T17 | 3.29 | 376  | HOMO-2 to LUMO+1 |
|                                   | T18 | 3.34 | 371  | HOMO-1 to LUMO+1 |
|                                   | T19 | 3.38 | 366  | HOMO to LUMO+1   |
|                                   | T20 | 3.41 | 363  | HOMO-2 to LUMO+2 |
|                                   | T21 | 3.49 | 354  | HOMO-2 to LUMO+1 |
|                                   | T22 | 3.52 | 352  | HOMO to LUMO+4   |
|                                   | T23 | 3.59 | 345  | HOMO-3 to LUMO+1 |
|                                   | T24 | 3.63 | 341  | HOMO-1 to LUMO+2 |
|                                   | T25 | 3.65 | 340  | HOMO-2 to LUMO+2 |
|                                   | T26 | 3.72 | 333  | HOMO-2 to LUMO+1 |
|                                   | T27 | 3.76 | 329  | HOMO-1 to LUMO+2 |
|                                   | T28 | 3.82 | 324  | HOMO-1 to LUMO+3 |
|                                   | T39 | 3.87 | 320  | HOMO-2 to LUMO+2 |
